# Supplementary material for: The Negative Effect of Protein Phosphatase Z1 Deletion on the Oxidative Stress Tolerance of Candida albicans Is Synergistic with Betamethasone Exposure
Source: MDPI journal article supplement (doi:10.3390/jof7070540), 2021-07-06
Supplement: s1 [file s1]

**Supplementary Table S1. Oligonucleotide primers used in RT-qPCR analysis**

| cDNA name Gene / ID              | Function                         | Forward primer (5'-3') | Reverse primer (5'-3') |
|----------------------------------|----------------------------------|------------------------|------------------------|
| <b>Controls</b>                  |                                  |                        |                        |
| <i>PP2I</i> (CR_06420W)          | Ser/Thr protein phosphatase      | TCACAACAACGTCCACAACCA  | GACAACGGTGAACCTGGC     |
| <i>ACT1</i> (C1_13700W)          | Actin                            | GTTGCTCCAGAAGAACATCC   | ACCATCACCAGAATCCAAAAC  |
| <i>RIP1</i> (C3_04430W)          | Ubiquinol cytochrome c-reductase | ACAACCACCACCACCTTATC   | AGCCATAGCCAAAACATCAG   |
| <i>EFG1</i> (CR_07890W)          | Transcription factor             | TTGCTGCTGCTACTACTACTG  | CTGACCATACTGTTGAGGATAC |
| <b>Oxidative stress response</b> |                                  |                        |                        |
| <i>CAT1</i> (C1_06810W)          | Catalase                         | TTTCTCTTTTGGGTGTGGATG  | GGTGGTGAATTAGGTTCTGC   |
| <i>SOD1</i> (C4_02320C)          | Superoxide dismutase             | TTGAACAAGAATCCGAATCCG  | GAAATGAGGACCAGCAGAAG   |
| <i>SOD3</i> (C7_00110W)          | Superoxide dismutase             | TGCTCAGTATGGGTCTGTTTC  | ATCCTGATTGGCAGTAGTGAC  |
| <i>GLR1</i> (C5_01520C)          | Glutathione reductase            | TTTTCCGCTGACAAGACTTTG  | ATTCAACCCCAATGTAACCAG  |
| <i>TRR1</i> (C5_02710W)          | Thioredoxin reductase            | CGAAGGTATGTTGGCTAATG   | CTTTGGAGATGGTTTCAGTG   |
| <b>Membrane transport</b>        |                                  |                        |                        |
| <i>CDR1</i> (C3_05220W)          | Drug transmembrane transporter   | GTCGCTGGTGAAGGTTTG     | AAGTGCTGATGGTTGATGG    |
| <i>MDR1</i> (C6_03170C)          | Drug transmembrane transporter   | TGCCCATCCAGAAGAAG      | ACCATCCCAAGTGACAAC     |
| <i>PMA1</i> (C3_00720W)          | Plasma membrane H(+)-ATPase      | TGAAGACGAAGACATTGACC   | CTAAACCAGCAGCCAAAAC    |
| <i>HGT17</i> (C4_01070W)         | Hexose transmembrane transporter | GTGATTGCCGAGAAGGAAG    | CAGCCGACATTTTCAAAGTC   |
| <b>Metabolism</b>                |                                  |                        |                        |
| <i>PCK1</i> (CR_00200W)          | Gluconeogenesis                  | GTTGTTGACGCTTATGCTG    | ACCTTTAGTGTGGATGTTGG   |
| <i>PXP2</i> (C3_01930W)          | Fatty acid beta-oxidation        | CGGTTCCCTTTGGTATGAC    | TGTGAGTGGCAGAATGAG     |
| <i>CFL4</i> (C5_01360W)          | Ferric reductase                 | TGAGTTGGGTCTTTTTCGC    | ACGGCTGTAGTTGTGTTTCG   |
| <i>FTR1</i> (C1_14130W)          | Iron permease                    | TAGTCCAGCCACCTCTTTC    | AACCAGCAGCAATCAAGTAC   |
