# Supplementary material for: The Negative Effect of Protein Phosphatase Z1 Deletion on the Oxidative Stress Tolerance of Candida albicans Is Synergistic with Betamethasone Exposure
Source: MDPI journal article supplement (doi:10.3390/jof7070540), 2021-07-06
Supplement: s1 [file s1]

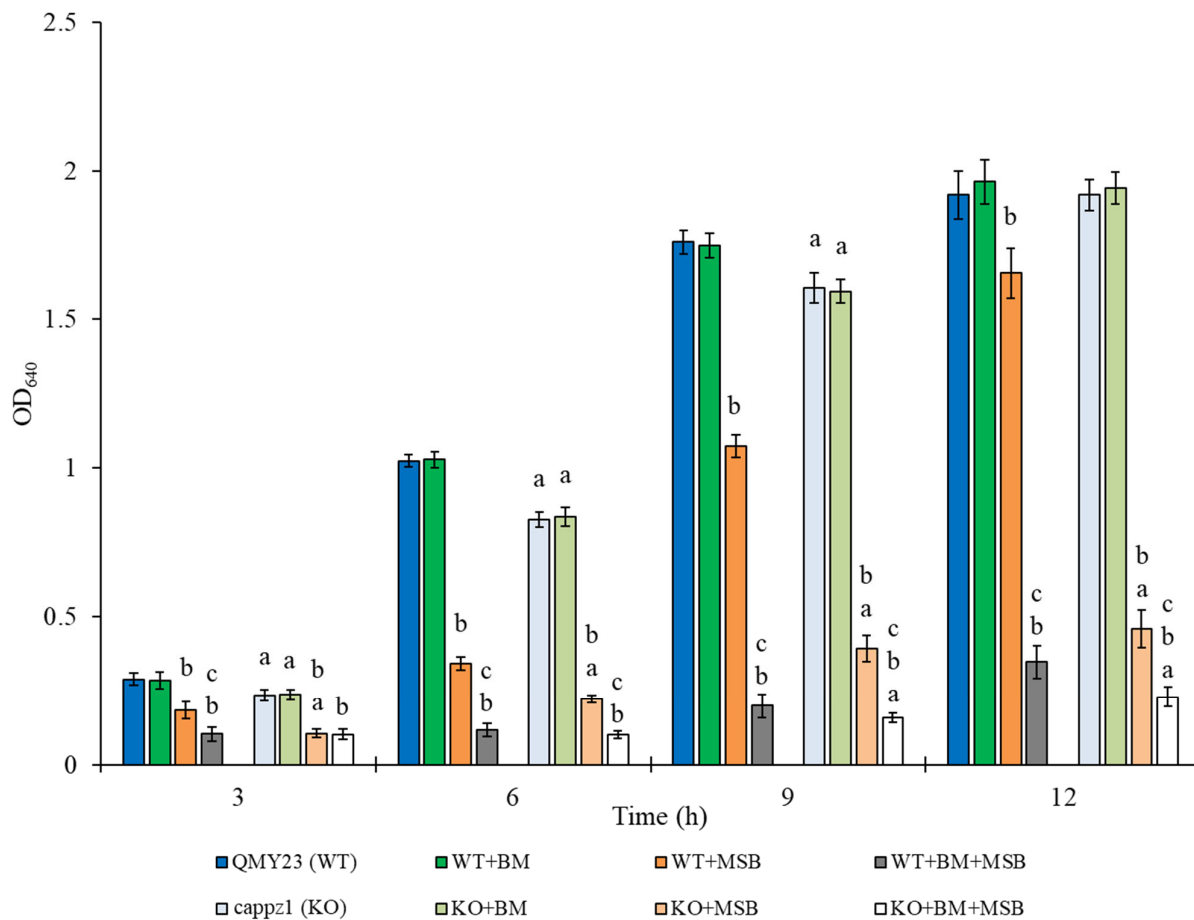

**Supplementary Figure S1. Effect of BM and/or MSB on microbial growth.** Growth of WT or KO in YPD broth with or without 12 h 2 mM BM treatment was monitored based on OD<sub>640</sub> measurements. MSB was added at 0 h in 0.5 mM final concentration to half of the samples. Data represent mean  $\pm$  SD values calculated from 3 independent experiments.

<sup>a</sup> Significant difference between untreated KO vs untreated WT and treated KO vs treated WT

<sup>b</sup> Significant difference between treated WT vs untreated WT and treated KO vs untreated KO

<sup>c</sup> Significant interaction between the effects of BM and MSB according to two-way ANOVA.
