# Supplementary material for: The Negative Effect of Protein Phosphatase Z1 Deletion on the Oxidative Stress Tolerance of Candida albicans Is Synergistic with Betamethasone Exposure
Source: J Fungi (Basel). 2021 Jul 6;7(7):540. doi: 10.3390/jof7070540 (PMC8305657; doi:10.3390/jof7070540)
Supplement: Supplementary file 1 [file jof-07-00540-s001.zip]

Archive with 6 entries (6 files):
- jof-1267055-supplementary/FigureS1_Growth assay.pdf
- jof-1267055-supplementary/FigureS2_PCA_New.pdf
- jof-1267055-supplementary/TableS1_Primer list.pdf
- jof-1267055-supplementary/TableS2_Enrichment analysis.xlsx
- jof-1267055-supplementary/TableS3_ Transcription data.xlsx
- jof-1267055-supplementary/TableS4_RT-PCR vs RNAseq.xlsx
