# Supplementary material for: The Negative Effect of Protein Phosphatase Z1 Deletion on the Oxidative Stress Tolerance of Candida albicans Is Synergistic with Betamethasone Exposure
Source: J Fungi (Basel). 2021 Jul 6;7(7):540. doi: 10.3390/jof7070540 (PMC8305657; doi:10.3390/jof7070540)
Supplement: Supplementary file 1 [file jof-07-00540-s001.zip › jof-1267055-supplementary/TableS2_Enrichment analysis.xlsx]

## Sheet: Overview
Supplementary Table S2 Results of the gene set enrichment analysis
Significant shared GO terms (p < 0.05) were determined with Candida Genome Database Gene Ontology Term Finder (http://www.candidagenome.org/cgi-bin/GO/goTermFinder).
Biological processes, molecular function and cellular component categories were tested.
Part 1 – cappz1 strain untreated vs. QMY23 strain untreated
Part 2 – cappz1 strain MSB treated vs. QMY23 strain MSB treated
Part 3 – cappz1 strain BM+MSB treated vs. QMY23 strain BM+MSB treated
Part 4 – QMY23 strain MSB treated vs. QMY23 strain untreated
Part 5 – QMY23 strain BM+MSB treated vs. QMY23 strain untreated
Part 6– cappz1 strain MSB treated vs. cappz1 strain untreated
Part 7 – cappz1 strain BM+MSB treated vs. cappz1 strain untreated

## Sheet: Part 1
Supplementary Table 2 Results of the gene set enrichment analysis
Part 1– cappz1 strain untreated vs. QMY23 strain untreated
Upregulated gene set
Biological process
GOID	GO_term	Cluster frequency	Background frequency	Corrected P-value	False discovery rate	Gene(s) annotated to the term	Directly Annotated GOID List
6826	iron ion transport	7 out of 150 genes, 4.7%	29 out of 6473 background genes, 0.4%	0.00141	0	FTH1:SIT1:FRP1:RBT5:FRE10:CFL4:CFL5	55114:44011:55085:34755:43709:6826:6879:20028:35690:15677:33215:15891:10106:6897:42928:44718
22610	biological adhesion	10 out of 150 genes, 6.7%	89 out of 6473 background genes, 1.4%	0.01567	0.04	CSH1:PBR1:WOR1:HYR1:RBT5:SAP10:C5_02110W_A:SAP5:ALS4:ALS2	44406:1900239:30448:44182:43709:7155:44010:71470:45944:44270:1900461:2000220:6355:7009:1900231:34599:1990277:30163:1900241:44011:98609:1903614:20028:71502:34605:6807:44413:6950:31505:10972:7160:6508:6879:9405:44407:36166
6811	ion transport	19 out of 150 genes, 12.7%	293 out of 6473 background genes, 4.5%	0.01823	0.0267	C1_06000W_A:FTH1:RTA2:SIT1:MEP1:FRP1:RBT5:SUL2:C4_03700W_A:FRE10:AGP3:VPS2:CFL4:CFL5:FAT1:FGR2:CR_01320C_A:SEO1:CR_06790C_A	6623:6791:1903714:90517:36180:45324:43709:19740:15802:15677:70676:33215:15891:30447:15696:55085:98713:1990591:34204:6820:10106:43328:9267:71216:55114:46519:72488:44539:44011:34755:6826:20028:8272:8152:6995:44718:42928:6897:3333:45053:1990961:6950:6865:1905329:45332:36170:38:15695:6879:35690:1904669
55114	oxidation-reduction process	23 out of 150 genes, 15.3%	405 out of 6473 background genes, 6.3%	0.02218	0.025	GCV2:AOX2:SER33:EBP7:AMO1:AMO2:FRP1:C4_03340C_A:C4_03720C_A:FRE10:CFL2:GDH3:SOU1:IFG3:CFL4:CFL5:FET99:FET31:YMX6:SOD3:GAC1:IDP2:YHB1	1902170:46416:10230:7094:44182:5977:19676:15677:19430:15891:33215:30447:6801:15671:36267:52565:9070:6102:10106:34599:55114:6520:6537:71500:34755:1324:46436:6826:1902114:71218:9636:9408:6546:9308:19464:51321:42850:46456:6730:46210:6879:9405:70458:35690:6878:9310
41	transition metal ion transport	7 out of 150 genes, 4.7%	45 out of 6473 background genes, 0.7%	0.03023	0.024	FTH1:SIT1:FRP1:RBT5:FRE10:CFL4:CFL5	43709:15677:33215:15891:55085:10106:55114:44011:34755:6826:20028:44718:42928:6897:6879:35690
Molecular function
GOID	GO_term	Cluster frequency	Background frequency	Corrected P-value	False discovery rate	Gene(s) annotated to the term	Directly Annotated GOID List
16638	oxidoreductase activity, acting on the CH-NH2 group of donors	6 out of 150 genes, 4.0%	12 out of 6473 background genes, 0.2%	1.38e-05	0	GCV2:AMO1:AMO2:GDH3:IFG3:GCV1	3824:4047:3884:8131:4354:48038:5507:4375:30170:16491
16491	oxidoreductase activity	27 out of 150 genes, 18.0%	429 out of 6473 background genes, 6.6%	0.00016	0	CSH1:GCV2:AOX2:SER33:EBP7:AMO1:AMO2:PST1:PST2:FRP1:C4_03340C_A:C4_03720C_A:FRE10:CFL2:GDH3:SOU1:IFG3:CFL4:CFL5:C5_02990W_A:FET99:FET31:GCV1:YMX6:SOD3:IDP2:YHB1	50660:3884:3955:8131:18456:5506:51287:5507:4090:16616:50625:16722:61759:16491:4617:32115:50085:9055:8941:3824:19825:9916:4354:46872:4450:30145:8823:4784:10181:4047:16655:48038:16706:16966:4375:8137:20037:30170:293
293	ferric-chelate reductase activity	4 out of 150 genes, 2.7%	6 out of 6473 background genes, 0.1%	0.00048	0.0067	FRP1:FRE10:CFL4:CFL5	16722:16491:8823:293
16723	oxidoreductase activity, oxidizing metal ions, NAD or NADP as acceptor	4 out of 150 genes, 2.7%	7 out of 6473 background genes, 0.1%	0.0011	0.005	FRP1:FRE10:CFL4:CFL5	16722:16491:8823:293
16722	oxidoreductase activity, oxidizing metal ions	4 out of 150 genes, 2.7%	11 out of 6473 background genes, 0.2%	0.00966	0.028	FRP1:FRE10:CFL4:CFL5	16722:16491:8823:293
16641	oxidoreductase activity, acting on the CH-NH2 group of donors, oxygen as acceptor	3 out of 150 genes, 2.0%	5 out of 6473 background genes, 0.1%	0.01414	0.0233	AMO1:AMO2:IFG3	3884:8131:5507:16491:48038
Cellular component
GOID	GO_term	Cluster frequency	Background frequency	Corrected P-value	False discovery rate	Gene(s) annotated to the term	Directly Annotated GOID List
9986	cell surface	22 out of 150 genes, 14.7%	203 out of 6473 background genes, 3.1%	8.84e-08	0	CSH1:COI1:PLB5:HYR1:HSP21:SIT1:PIR1:DDR48:PGA7:RBT5:CRH11:PGA31:FRE10:SAP10:ECM331:FET99:ALS4:ALS2:PGA23:PHO112:RBR1:PGA13	5737:131:5768:9986:5829:31410:46658:16021:5621:5886:30287:9277:16020:30445:34399:5576:30446
71944	cell periphery	43 out of 150 genes, 28.7%	754 out of 6473 background genes, 11.6%	7.16e-07	0	CSH1:PLB5:AOX2:FTH1:HYR1:C2_00750W_A:HGT8:HGT20:WH11:RTA3:RTA2:PST1:SIT1:PHM7:PST2:PIR1:DDR48:MEP1:GLX3:RBT5:C4_00860C_A:SUL2:C4_02720C_A:CRH11:C4_03700W_A:PGA31:FRE10:SAP10:CFL4:CFL5:C5_01440C_A:HSP12:C5_02110W_A:ECM331:FET99:FET31:FAT1:ALS4:ALS2:AQY1:SEO1:CR_06790C_A:PGA13	33573:9986:46658:324:16021:329:5621:5886:5887:5811:5935:30445:30446:62040:5737:5768:131:5829:31410:5739:5783:5777:932:71944:31235:9277:16020:5634:34399:10494:5576:45121
5618	cell wall	18 out of 150 genes, 12.0%	163 out of 6473 background genes, 2.5%	2.47e-06	0	CSH1:PLB5:HYR1:WH11:PST2:PIR1:DDR48:GLX3:RBT5:CRH11:PGA31:SAP10:HSP12:C5_02110W_A:ECM331:ALS4:ALS2:PGA13	9986:46658:5621:5886:30445:30446:62040:5737:5768:131:5829:932:9277:5634:10494:34399:5576
9277	fungal-type cell wall	18 out of 150 genes, 12.0%	163 out of 6473 background genes, 2.5%	2.47e-06	0	CSH1:PLB5:HYR1:WH11:PST2:PIR1:DDR48:GLX3:RBT5:CRH11:PGA31:SAP10:HSP12:C5_02110W_A:ECM331:ALS4:ALS2:PGA13	9986:46658:5621:5886:30445:30446:62040:5737:5768:131:5829:932:9277:5634:10494:34399:5576
30312	external encapsulating structure	18 out of 150 genes, 12.0%	164 out of 6473 background genes, 2.5%	2.72e-06	0	CSH1:PLB5:HYR1:WH11:PST2:PIR1:DDR48:GLX3:RBT5:CRH11:PGA31:SAP10:HSP12:C5_02110W_A:ECM331:ALS4:ALS2:PGA13	9986:46658:5621:5886:30445:30446:62040:5737:5768:131:5829:932:9277:5634:10494:34399:5576
5886	plasma membrane	32 out of 150 genes, 21.3%	509 out of 6473 background genes, 7.9%	1.04e-05	0	AOX2:FTH1:HYR1:C2_00750W_A:HGT8:HGT20:RTA3:RTA2:PST1:SIT1:PHM7:PST2:MEP1:RBT5:C4_00860C_A:SUL2:C4_02720C_A:CRH11:C4_03700W_A:FRE10:SAP10:CFL4:CFL5:C5_01440C_A:C5_02110W_A:ECM331:FET99:FET31:FAT1:AQY1:SEO1:CR_06790C_A	33573:9986:46658:324:16021:329:5886:5887:5811:5935:30445:30446:5737:131:5768:5829:31410:5777:5783:5739:71944:31235:9277:16020:5634:5576:45121
30446	hyphal cell wall	10 out of 150 genes, 6.7%	69 out of 6473 background genes, 1.1%	0.00029	0	CSH1:PLB5:HYR1:WH11:PST2:DDR48:GLX3:CRH11:HSP12:C5_02110W_A	9986:46658:5886:30445:30446:62040:5737:5768:131:5829:932:9277:5634:10494:5576
30445	yeast-form cell wall	9 out of 150 genes, 6.0%	56 out of 6473 background genes, 0.9%	0.00038	0	WH11:PIR1:GLX3:RBT5:CRH11:PGA31:HSP12:C5_02110W_A:ALS4	9986:46658:5886:5621:30445:30446:62040:5737:5768:131:5829:932:9277:5634:10494:34399:5576
16020	membrane	50 out of 150 genes, 33.3%	1309 out of 6473 background genes, 20.2%	0.00817	0.0022	C1_06000W_A:C1_08780W_A:AOX2:FTH1:CHO1:HYR1:C2_00750W_A:HGT8:HGT20:MDJ2:RTA3:RTA2:PST1:SIT1:PHM7:PST2:C2_09870W_A:MEP1:AAP1:RCT1:RBT5:C4_00860C_A:SUL2:C4_02720C_A:CRH11:C4_03700W_A:FRE10:SAP10:AGP3:C4_06910W_A:VPS2:CFL4:CFL5:C5_01440C_A:C5_02110W_A:ECM331:C5_02990W_A:FET99:FET31:FAT1:FGR2:NUP:CR_01320C_A:PHO112:AQY1:CR_03350C_A:HXT5:CR_03580C_A:SEO1:CR_06790C_A	33573:9986:5789:46658:324:16021:329:5886:5887:5811:5935:30445:815:30446:5737:131:5768:1405:5829:31410:5777:5783:5739:19867:71944:30287:5743:31235:9277:16020:5634:5576:45121:5741
5576	extracellular region	13 out of 150 genes, 8.7%	191 out of 6473 background genes, 3.0%	0.03795	0.006	SAP7:COI1:C1_08780W_A:HYR1:PIR1:GLX3:RBT5:CRH11:SAP10:GDH3:SAP5:ALS4:PHO112	9986:46658:329:5886:5621:30445:30446:62040:5622:5737:131:5829:932:30287:9277:16020:5634:10494:34399:5576
Downregulated gene set
Biological process
GOID	GO_term	Cluster frequency	Background frequency	Corrected P-value	False discovery rate	Gene(s) annotated to the term	Directly Annotated GOID List
6090	pyruvate metabolic process	10 out of 75 genes, 13.3%	26 out of 6473 background genes, 0.4%	4.5e-11	0	ENO1:PDX1:GPM1:CDC19:TDH3:PYC2:PGK1:LAT1:PFK2:PGI1	6096:44406:6006:30448:32889:36180:51701:61621:44409:30447:6002:44416:48315:42866:30388:71852:71216:9267:55114:44011:7035:70072:6094:7163:8152:15976:7160:36170:6086:51453:72593:6915:51211:42867:6090:15886
6096	glycolytic process	7 out of 75 genes, 9.3%	17 out of 6473 background genes, 0.3%	1.56e-07	0	ENO1:GPM1:CDC19:TDH3:PGK1:PFK2:PGI1	6096:44406:6006:30448:32889:36180:51701:61621:44409:30447:6002:44416:48315:42866:30388:71852:55114:9267:71216:70072:7035:6094:7163:7160:15976:36170:51453:72593:6915:51211:6090:15886
6757	ATP generation from ADP	7 out of 75 genes, 9.3%	17 out of 6473 background genes, 0.3%	1.56e-07	0	ENO1:GPM1:CDC19:TDH3:PGK1:PFK2:PGI1	6096:44406:6006:30448:32889:36180:51701:61621:44409:30447:6002:44416:48315:42866:30388:71852:55114:9267:71216:70072:7035:6094:7163:7160:15976:36170:51453:72593:6915:51211:6090:15886
46031	ADP metabolic process	7 out of 75 genes, 9.3%	18 out of 6473 background genes, 0.3%	2.53e-07	0	ENO1:GPM1:CDC19:TDH3:PGK1:PFK2:PGI1	6096:44406:6006:30448:32889:36180:51701:61621:44409:30447:6002:44416:48315:42866:30388:71852:55114:9267:71216:70072:7035:6094:7163:7160:15976:36170:51453:72593:6915:51211:6090:15886
6006	glucose metabolic process	7 out of 75 genes, 9.3%	19 out of 6473 background genes, 0.3%	3.98e-07	0	ENO1:GPM1:CDC19:TDH3:PYC2:PGK1:PGI1	6096:44406:6006:30448:32889:36180:51701:61621:44409:30447:44416:48315:42866:71852:55114:9267:71216:6094:7163:8152:7160:15976:36170:72593:6915:51211:6090:15886
6165	nucleoside diphosphate phosphorylation	7 out of 75 genes, 9.3%	19 out of 6473 background genes, 0.3%	3.98e-07	0	ENO1:GPM1:CDC19:TDH3:PGK1:PFK2:PGI1	6096:44406:6006:30448:32889:36180:51701:61621:44409:30447:6002:44416:48315:42866:30388:71852:55114:9267:71216:70072:7035:6094:7163:7160:15976:36170:51453:72593:6915:51211:6090:15886
9135	purine nucleoside diphosphate metabolic process	7 out of 75 genes, 9.3%	19 out of 6473 background genes, 0.3%	3.98e-07	0	ENO1:GPM1:CDC19:TDH3:PGK1:PFK2:PGI1	6096:44406:6006:30448:32889:36180:51701:61621:44409:30447:6002:44416:48315:42866:30388:71852:55114:9267:71216:70072:7035:6094:7163:7160:15976:36170:51453:72593:6915:51211:6090:15886
9179	purine ribonucleoside diphosphate metabolic process	7 out of 75 genes, 9.3%	19 out of 6473 background genes, 0.3%	3.98e-07	0	ENO1:GPM1:CDC19:TDH3:PGK1:PFK2:PGI1	6096:44406:6006:30448:32889:36180:51701:61621:44409:30447:6002:44416:48315:42866:30388:71852:55114:9267:71216:70072:7035:6094:7163:7160:15976:36170:51453:72593:6915:51211:6090:15886
19752	carboxylic acid metabolic process	20 out of 75 genes, 26.7%	350 out of 6473 background genes, 5.4%	5.82e-07	0	LEU4:ENO1:GLY1:PDX1:GPM1:BAT21:CDC19:GDH2:LEU42:TDH3:PYC2:TRP4:PGK1:ILV5:LAT1:PFK2:ECM42:PGI1:ARO10:FDH3	6096:6006:30448:32889:51701:162:61621:30447:6002:44416:48315:45454:9097:71852:55114:71216:6520:6559:70072:7035:6094:7163:6546:8152:6807:6552:19551:7160:15976:6086:51453:949:6915:9082:51211:6090:15886:46294:44406:6526:2:36180:6069:44409:6544:6592:33859:42866:34599:30388:9267:9099:44011:8652:9081:9083:9098:951:950:6730:36170:6569:72593:9405:35690:947:42867
9185	ribonucleoside diphosphate metabolic process	7 out of 75 genes, 9.3%	21 out of 6473 background genes, 0.3%	9.02e-07	0	ENO1:GPM1:CDC19:TDH3:PGK1:PFK2:PGI1	6096:6006:30448:32889:51701:61621:30447:6002:44416:48315:71852:55114:71216:70072:7035:6094:7163:7160:15976:51453:6915:51211:6090:15886:44406:36180:44409:42866:30388:9267:36170:72593
43436	oxoacid metabolic process	20 out of 75 genes, 26.7%	362 out of 6473 background genes, 5.6%	1.05e-06	0	LEU4:ENO1:GLY1:PDX1:GPM1:BAT21:CDC19:GDH2:LEU42:TDH3:PYC2:TRP4:PGK1:ILV5:LAT1:PFK2:ECM42:PGI1:ARO10:FDH3	6096:6006:30448:32889:51701:162:61621:30447:6002:44416:48315:45454:9097:71852:55114:71216:6520:6559:70072:7035:6094:7163:6546:8152:6807:6552:19551:7160:15976:6086:51453:949:6915:9082:51211:6090:15886:46294:6526:44406:2:36180:6069:44409:6544:6592:33859:42866:34599:30388:9267:9099:44011:8652:9083:9081:9098:950:951:6730:36170:6569:72593:9405:947:35690:42867
6082	organic acid metabolic process	20 out of 75 genes, 26.7%	363 out of 6473 background genes, 5.6%	1.1e-06	0	LEU4:ENO1:GLY1:PDX1:GPM1:BAT21:CDC19:GDH2:LEU42:TDH3:PYC2:TRP4:PGK1:ILV5:LAT1:PFK2:ECM42:PGI1:ARO10:FDH3	6096:6006:30448:32889:51701:162:61621:30447:6002:44416:48315:45454:9097:71852:55114:71216:6520:6559:70072:7035:6094:7163:6546:8152:6807:6552:19551:7160:15976:6086:51453:949:6915:9082:51211:6090:15886:46294:6526:44406:2:36180:6069:44409:6544:6592:33859:42866:34599:30388:9267:9099:44011:8652:9083:9081:9098:950:951:6730:36170:6569:72593:9405:947:35690:42867
46939	nucleotide phosphorylation	7 out of 75 genes, 9.3%	22 out of 6473 background genes, 0.3%	1.31e-06	0	ENO1:GPM1:CDC19:TDH3:PGK1:PFK2:PGI1	6096:6006:30448:32889:51701:61621:30447:6002:44416:48315:71852:55114:71216:70072:7035:6094:7163:7160:15976:51453:6915:51211:6090:15886:44406:36180:44409:42866:30388:9267:36170:72593
9132	nucleoside diphosphate metabolic process	7 out of 75 genes, 9.3%	24 out of 6473 background genes, 0.4%	2.61e-06	0	ENO1:GPM1:CDC19:TDH3:PGK1:PFK2:PGI1	6096:6006:30448:32889:51701:61621:30447:6002:44416:48315:71852:55114:71216:70072:7035:6094:7163:7160:15976:51453:6915:51211:6090:15886:44406:36180:44409:42866:30388:9267:36170:72593
6094	gluconeogenesis	5 out of 75 genes, 6.7%	9 out of 6473 background genes, 0.1%	9.29e-06	0	ENO1:GPM1:PYC2:PGK1:PGI1	6096:30448:32889:51701:30447:44416:48315:71852:71216:6094:7163:8152:15976:51211:6090:36180:44409
19319	hexose biosynthetic process	5 out of 75 genes, 6.7%	10 out of 6473 background genes, 0.2%	1.84e-05	0	ENO1:GPM1:PYC2:PGK1:PGI1	6096:30448:32889:51701:30447:44416:48315:71852:71216:6094:7163:8152:15976:51211:6090:36180:44409
46364	monosaccharide biosynthetic process	5 out of 75 genes, 6.7%	10 out of 6473 background genes, 0.2%	1.84e-05	0	ENO1:GPM1:PYC2:PGK1:PGI1	6096:30448:32889:51701:30447:44416:48315:71852:71216:6094:7163:8152:15976:51211:6090:36180:44409
19318	hexose metabolic process	7 out of 75 genes, 9.3%	35 out of 6473 background genes, 0.5%	4.58e-05	0	ENO1:GPM1:CDC19:TDH3:PYC2:PGK1:PGI1	6096:6006:30448:32889:51701:61621:30447:44416:48315:71852:55114:71216:6094:7163:8152:7160:15976:6915:51211:6090:15886:44406:36180:44409:42866:9267:36170:72593
5996	monosaccharide metabolic process	7 out of 75 genes, 9.3%	41 out of 6473 background genes, 0.6%	0.00014	0	ENO1:GPM1:CDC19:TDH3:PYC2:PGK1:PGI1	6096:6006:30448:32889:51701:61621:30447:44416:48315:71852:55114:71216:6094:7163:8152:7160:15976:6915:51211:6090:15886:44406:36180:44409:42866:9267:36170:72593
9150	purine ribonucleotide metabolic process	9 out of 75 genes, 12.0%	83 out of 6473 background genes, 1.3%	0.00015	0	ENO1:PDX1:GPM1:CDC19:TDH3:PGK1:LAT1:PFK2:PGI1	6096:6006:30448:32889:51701:61621:30447:6002:44416:48315:71852:55114:71216:70072:7035:6094:7163:8152:7160:15976:6086:51453:6915:51211:6090:15886:44406:36180:44409:42866:30388:9267:44011:36170:72593:42867
6163	purine nucleotide metabolic process	9 out of 75 genes, 12.0%	84 out of 6473 background genes, 1.3%	0.00017	0	ENO1:PDX1:GPM1:CDC19:TDH3:PGK1:LAT1:PFK2:PGI1	6096:6006:30448:32889:51701:61621:30447:6002:44416:48315:71852:55114:71216:70072:7035:6094:7163:8152:7160:15976:6086:51453:6915:51211:6090:15886:44406:36180:44409:42866:30388:9267:44011:36170:72593:42867
9259	ribonucleotide metabolic process	9 out of 75 genes, 12.0%	89 out of 6473 background genes, 1.4%	0.00029	0	ENO1:PDX1:GPM1:CDC19:TDH3:PGK1:LAT1:PFK2:PGI1	6096:6006:30448:32889:51701:61621:30447:6002:44416:48315:71852:55114:71216:70072:7035:6094:7163:8152:7160:15976:6086:51453:6915:51211:6090:15886:44406:36180:44409:42866:30388:9267:44011:36170:72593:42867
9081	branched-chain amino acid metabolic process	5 out of 75 genes, 6.7%	17 out of 6473 background genes, 0.3%	0.00042	0	LEU4:BAT21:LEU42:ILV5:ARO10	9097:55114:6559:8152:6552:949:9082:2:9099:8652:9083:9081:9098:950:951:6569:35690
6551	leucine metabolic process	4 out of 75 genes, 5.3%	8 out of 6473 background genes, 0.1%	0.00047	0	LEU4:BAT21:LEU42:ARO10	9097:6559:8152:6552:949:9082:9099:9083:9081:9098:950:951:6569:35690
19693	ribose phosphate metabolic process	9 out of 75 genes, 12.0%	95 out of 6473 background genes, 1.5%	0.00051	0	ENO1:PDX1:GPM1:CDC19:TDH3:PGK1:LAT1:PFK2:PGI1	6096:6006:30448:32889:51701:61621:30447:6002:44416:48315:71852:55114:71216:70072:7035:6094:7163:8152:7160:15976:6086:51453:6915:51211:6090:15886:44406:36180:44409:42866:30388:9267:44011:36170:72593:42867
46034	ATP metabolic process	8 out of 75 genes, 10.7%	71 out of 6473 background genes, 1.1%	0.00055	0	ENO1:GPM1:CDC19:NDE1:TDH3:PGK1:PFK2:PGI1	6096:6006:30448:32889:51701:61621:30447:6002:44416:48315:6116:71852:55114:71216:70072:7035:6094:7163:7160:15976:51453:6915:51211:1300:6090:15886:44406:36180:44409:19655:6355:42866:30388:9267:36170:72593
72521	purine-containing compound metabolic process	9 out of 75 genes, 12.0%	103 out of 6473 background genes, 1.6%	0.00101	0	ENO1:PDX1:GPM1:CDC19:TDH3:PGK1:LAT1:PFK2:PGI1	6096:6006:30448:32889:51701:61621:30447:6002:44416:48315:71852:55114:71216:70072:7035:6094:7163:8152:7160:15976:6086:51453:6915:51211:6090:15886:44406:36180:44409:42866:30388:9267:44011:36170:72593:42867
44281	small molecule metabolic process	21 out of 75 genes, 28.0%	602 out of 6473 background genes, 9.3%	0.00109	0	LEU4:ENO1:GLY1:PDX1:GPM1:BAT21:CDC19:GDH2:LEU42:RAD53:TDH3:PYC2:TRP4:PGK1:ILV5:LAT1:PFK2:ECM42:PGI1:ARO10:FDH3	6096:6006:30448:32889:1900439:51701:162:6270:61621:70887:30447:6002:44416:6281:48315:45454:9097:71852:55114:71216:6468:6520:6559:70072:7035:6094:7163:9202:77:6546:8152:6807:6552:19551:7160:15976:6086:51453:949:6915:9082:42326:51211:6090:15886:46294:6526:44406:33315:2:36180:6069:44409:6544:75:6592:33859:42866:34599:30388:9267:9099:44011:8652:8104:9083:9081:31573:46826:9098:950:951:1903466:36171:67…
16052	carbohydrate catabolic process	7 out of 75 genes, 9.3%	55 out of 6473 background genes, 0.8%	0.00115	0	ENO1:GPM1:CDC19:TDH3:PGK1:PFK2:PGI1	6096:6006:30448:32889:51701:61621:30447:6002:44416:48315:71852:55114:71216:70072:7035:6094:7163:7160:15976:51453:6915:51211:6090:15886:44406:36180:44409:42866:30388:9267:36170:72593
6753	nucleoside phosphate metabolic process	10 out of 75 genes, 13.3%	135 out of 6473 background genes, 2.1%	0.00122	0	ENO1:PDX1:GPM1:CDC19:RAD53:TDH3:PGK1:LAT1:PFK2:PGI1	6096:6006:30448:32889:1900439:51701:6270:61621:70887:30447:6002:44416:6281:48315:71852:55114:71216:6468:70072:7035:6094:7163:9202:77:8152:7160:15976:6086:51453:6915:42326:51211:6090:15886:44406:33315:36180:44409:75:42866:30388:9267:44011:8104:31573:46826:1903466:36171:36170:72593:42867:33314
44283	small molecule biosynthetic process	14 out of 75 genes, 18.7%	280 out of 6473 background genes, 4.3%	0.00126	0	LEU4:ENO1:GPM1:BAT21:CDC19:LEU42:PYC2:TRP4:PGK1:ILV5:ECM42:PGI1:ARO10:FDH3	6096:30448:32889:51701:162:61621:30447:44416:48315:45454:9097:71852:55114:71216:6559:6094:7163:6546:8152:6552:15976:949:9082:51211:6090:46294:6526:2:36180:6069:44409:6592:33859:42866:34599:9267:9099:8652:9083:9081:9098:950:951:36170:6569:9405:947:35690
32787	monocarboxylic acid metabolic process	10 out of 75 genes, 13.3%	144 out of 6473 background genes, 2.2%	0.00219	0	ENO1:PDX1:GPM1:CDC19:TDH3:PYC2:PGK1:LAT1:PFK2:PGI1	6096:6006:30448:32889:51701:61621:30447:6002:44416:48315:71852:55114:71216:70072:7035:6094:7163:8152:7160:15976:6086:51453:6915:51211:6090:15886:44406:36180:44409:42866:30388:9267:44011:36170:72593:42867
9082	branched-chain amino acid biosynthetic process	4 out of 75 genes, 5.3%	12 out of 6473 background genes, 0.2%	0.00321	0	LEU4:BAT21:LEU42:ILV5	9097:55114:8152:9082:2:9099:8652:9083:9081:9098:35690
9098	leucine biosynthetic process	3 out of 75 genes, 4.0%	5 out of 6473 background genes, 0.1%	0.00615	0	LEU4:BAT21:LEU42	9097:8152:9082:9099:9083:9081:9098:35690
9117	nucleotide metabolic process	9 out of 75 genes, 12.0%	130 out of 6473 background genes, 2.0%	0.00691	0	ENO1:PDX1:GPM1:CDC19:TDH3:PGK1:LAT1:PFK2:PGI1	6096:6006:30448:32889:51701:61621:30447:6002:44416:48315:71852:55114:71216:70072:7035:6094:7163:8152:7160:15976:6086:51453:6915:51211:6090:15886:44406:36180:44409:42866:30388:9267:44011:36170:72593:42867
1901605	alpha-amino acid metabolic process	9 out of 75 genes, 12.0%	132 out of 6473 background genes, 2.0%	0.00782	0	LEU4:GLY1:BAT21:GDH2:LEU42:TRP4:ECM42:ARO10:FDH3	162:45454:9097:55114:6520:6559:6546:8152:6807:6552:19551:949:9082:46294:6526:6069:6544:6592:33859:34599:9099:9083:9081:9098:950:951:6730:6569:9405:947:35690
55086	nucleobase-containing small molecule metabolic process	10 out of 75 genes, 13.3%	168 out of 6473 background genes, 2.6%	0.00859	0	ENO1:PDX1:GPM1:CDC19:RAD53:TDH3:PGK1:LAT1:PFK2:PGI1	6096:6006:30448:32889:1900439:51701:6270:61621:70887:30447:6002:44416:6281:48315:71852:55114:71216:6468:70072:7035:6094:7163:9202:77:8152:7160:15976:6086:51453:6915:42326:51211:6090:15886:44406:33315:36180:44409:75:42866:30388:9267:44011:8104:31573:46826:1903466:36171:36170:72593:42867:33314
6091	generation of precursor metabolites and energy	9 out of 75 genes, 12.0%	139 out of 6473 background genes, 2.1%	0.01184	0	ENO1:GPM1:CDC19:NDE1:TDH3:PGK1:PFK2:PGI1:FDH3	6096:6006:30448:32889:51701:61621:30447:6002:44416:48315:45454:6116:71852:55114:71216:70072:7035:6094:7163:6546:7160:15976:51453:6915:51211:1300:6090:15886:46294:44406:36180:6069:44409:19655:6355:33859:42866:34599:30388:9267:36170:72593:9405:947
16051	carbohydrate biosynthetic process	6 out of 75 genes, 8.0%	59 out of 6473 background genes, 0.9%	0.02293	0	ENO1:GPM1:PYC2:MNN22:PGK1:PGI1	6096:30448:32889:51701:30447:44416:48315:71852:71216:6094:7163:8152:15976:51211:6090:36180:44409:35268:46354
5975	carbohydrate metabolic process	10 out of 75 genes, 13.3%	193 out of 6473 background genes, 3.0%	0.02828	0	ENO1:GPM1:CDC19:TDH3:PYC2:MNN22:PGK1:PFK2:PGI1:HSP104	6096:6006:30448:32889:19538:51701:61621:30447:6002:44416:48315:71852:1319:55114:71216:70370:70072:7035:6094:7163:34605:8152:7160:15976:51453:43335:6915:51211:6090:15886:70414:44406:34975:36180:44409:35268:42026:51085:42866:35617:30388:9267:44011:46354:71218:36170:72593:9405
31349	positive regulation of defense response	4 out of 75 genes, 5.3%	20 out of 6473 background genes, 0.3%	0.02932	0	ENO1:CDC19:TDH3:PGK1	6096:6006:32889:51701:61621:30447:44416:71852:55114:71216:6094:7160:15976:6915:6090:15886:44406:36180:44409:42866:9267:36170:72593
44416	induction by symbiont of host defense response	4 out of 75 genes, 5.3%	20 out of 6473 background genes, 0.3%	0.02932	0	ENO1:CDC19:TDH3:PGK1	6096:6006:32889:51701:61621:30447:44416:71852:55114:71216:6094:7160:15976:6915:6090:15886:44406:36180:44409:42866:9267:36170:72593
52251	induction by organism of defense response of other organism involved in symbiotic interaction	4 out of 75 genes, 5.3%	20 out of 6473 background genes, 0.3%	0.02932	0	ENO1:CDC19:TDH3:PGK1	6096:6006:32889:51701:61621:30447:44416:71852:55114:71216:6094:7160:15976:6915:6090:15886:44406:36180:44409:42866:9267:36170:72593
52509	positive regulation by symbiont of host defense response	4 out of 75 genes, 5.3%	20 out of 6473 background genes, 0.3%	0.02932	0	ENO1:CDC19:TDH3:PGK1	6096:6006:32889:51701:61621:30447:44416:71852:55114:71216:6094:7160:15976:6915:6090:15886:44406:36180:44409:42866:9267:36170:72593
52510	positive regulation by organism of defense response of other organism involved in symbiotic interaction	4 out of 75 genes, 5.3%	20 out of 6473 background genes, 0.3%	0.02932	0	ENO1:CDC19:TDH3:PGK1	6096:6006:32889:51701:61621:30447:44416:71852:55114:71216:6094:7160:15976:6915:6090:15886:44406:36180:44409:42866:9267:36170:72593
6520	cellular amino acid metabolic process	10 out of 75 genes, 13.3%	196 out of 6473 background genes, 3.0%	0.03221	0	LEU4:GLY1:BAT21:GDH2:LEU42:TRP4:ILV5:ECM42:ARO10:FDH3	162:45454:9097:55114:6520:6559:6546:8152:6807:6552:19551:949:9082:46294:6526:2:6069:6544:6592:33859:34599:9099:8652:9083:9081:9098:950:951:6730:6569:9405:947:35690
31347	regulation of defense response	4 out of 75 genes, 5.3%	21 out of 6473 background genes, 0.3%	0.03591	0	ENO1:CDC19:TDH3:PGK1	6096:6006:32889:51701:61621:30447:44416:71852:55114:71216:6094:7160:15976:6915:6090:15886:44406:36180:44409:42866:9267:36170:72593
51701	interaction with host	6 out of 75 genes, 8.0%	65 out of 6473 background genes, 1.0%	0.0398	0	ENO1:GPM1:CDC19:TDH3:GPR1:PGK1	6096:10255:6006:32889:1900439:51701:61621:70887:30447:44416:1402:71852:55114:71216:6094:34605:71333:7160:15976:6915:1900432:6090:15886:44406:36168:7186:44182:9745:36180:20012:44409:9731:42866:51594:7124:9267:9593:1302:1403:36171:36170:9757:72593
Molecular function
GOID	GO_term	Cluster frequency	Background frequency	Corrected P-value	False discovery rate	Gene(s) annotated to the term	Directly Annotated GOID List
3852	2-isopropylmalate synthase activity	2 out of 75 genes, 2.7%	2 out of 6473 background genes, 0.0%	0.01099	0.1	LEU4:LEU42	3824:3852

## Sheet: Part 2
Supplementary Table 2 Results of the gene set enrichment analysis
Part 2 – cappz1 strain MSB treated vs. QMY23 strain MSB treated
Upregulated gene set
Biological process
GOID	GO_term	Cluster frequency	Background frequency	Corrected P-value	False discovery rate	Gene(s) annotated to the term	Directly Annotated GOID List
55114	oxidation-reduction process	54 out of 444 genes, 12.2%	405 out of 6473 background genes, 6.3%	0.00104	0	C1_00410C_A:C1_00630W_A:GOR1:GLT1:CAT1:ZWF1:AOX2:AOX1:MRF1:OSM2:SMP2:C2_05130W_A:IFM3:C2_08100W_A:C2_08850C_A:IFR1:DOT5:FOX2:SGA1:ALI1:CCP1:MET13:C4_02230C_A:C4_03340C_A:CFL2:GDH3:GUT2:OYE32:IFG3:CFL4:GLR1:C5_02690W_A:TRR1:FET99:C6_00850W_A:OYE2:OYE23:YMX6:POX1:GAC1:C7_02010C_A:C7_03350C_A:C7_03780C_A:C7_04310C_A:OYE22:LYS12:ADH5:IDP2:IFE2:ALK8:CR_07250C_A:YHB1:ECI1:XYL2	1902170:42180:46416:9060:6006:97054:51701:6081:6635:15677:42760:42144:36245:30447:36267:19432:52565:45454:6102:6116:46443:1315:55114:6520:6744:6537:9062:32180:10430:6979:6553:9064:8152:6807:9085:45329:51321:6555:34389:10731:304:6740:6072:6665:46210:302:6725:6915:70458:7029:19615:9051:6749:42744:10230:45333:7094:44182:5977:34975:6071:98869:19676:71763:19430:7005:48252:15671:34614:9436:42743:43603:…
6979	response to oxidative stress	27 out of 444 genes, 6.1%	153 out of 6473 background genes, 2.4%	0.00388	0.08	GAL10:CAT1:GCS1:ZWF1:HSP21:C2_05060C_A:GRE2:PST1:C2_08100W_A:PST2:DDR48:DOT5:CCP1:GLX3:POS5:GST2:ATG1:GLR1:C5_02110W_A:TRR1:C6_00850W_A:CIP1:MDR1:CCZ1:C7_03350C_A:PTC6:YHB1	1902170:42180:6006:1901098:71248:51701:44237:36245:19243:30447:6281:52565:43547:15903:45454:9272:48278:61709:19674:1315:71216:55114:6468:1904184:7034:46777:70370:42149:1903614:44395:6979:34605:6995:8152:1903715:422:10731:304:6740:6950:10972:1900436:6970:46210:45892:61191:6741:302:70458:6725:45:46686:9051:42125:6749:6623:70414:34727:42744:44182:33554:36180:98869:7155:6750:71470:19430:1900429:15671…
8643	carbohydrate transport	11 out of 444 genes, 2.5%	34 out of 6473 background genes, 0.5%	0.00903	0.0667	HGT2:GAL1:GUP1:HGT20:ITR1:C2_09280C_A:HGT5:STD1:HGT17:HXT5:HGT14	15798:30447:1904679:71216:19563:44182:36180:1904659:1900429:33499:19631:8645:19388:15757:15793:6506:8643:9267:44011:7165:46835:36170:411:15756:6012
15749	monosaccharide transmembrane transport	10 out of 444 genes, 2.3%	29 out of 6473 background genes, 0.4%	0.01221	0.06	HGT2:GAL1:HGT20:ITR1:C2_09280C_A:HGT5:STD1:HGT17:HXT5:HGT14	15798:30447:1904679:44182:1904659:1900429:33499:19631:8645:19388:15757:8643:7165:46835:411:15756:6012
8645	hexose transmembrane transport	10 out of 444 genes, 2.3%	29 out of 6473 background genes, 0.4%	0.01221	0.048	HGT2:GAL1:HGT20:ITR1:C2_09280C_A:HGT5:STD1:HGT17:HXT5:HGT14	15798:30447:1904679:44182:1904659:1900429:33499:19631:8645:19388:15757:8643:7165:46835:411:15756:6012
34219	carbohydrate transmembrane transport	10 out of 444 genes, 2.3%	30 out of 6473 background genes, 0.5%	0.01721	0.04	HGT2:GAL1:HGT20:ITR1:C2_09280C_A:HGT5:STD1:HGT17:HXT5:HGT14	15798:30447:1904679:44182:1904659:1900429:33499:19631:8645:19388:15757:8643:7165:46835:411:15756:6012
55085	transmembrane transport	46 out of 444 genes, 10.4%	365 out of 6473 background genes, 5.6%	0.03082	0.0343	HGT2:GAL1:DUR3:C1_06980C_A:CDR4:CTR2:C1_09210C_A:DUR7:HGT20:ITR1:PEX6:MDJ2:C2_09280C_A:C2_09590C_A:YOR1:DAL5:DAL9:AAP1:CDR11:C3_04360W_A:HGT5:OAC1:STD1:HGT17:SUL2:C4_04250W_A:PEX7:QDR3:MDR1:OPT8:C6_04110W_A:ATM1:C7_00630C_A:NUP:YCF1:TPO2:CR_00420W_A:GEF2:OPT4:HXT5:CR_03580C_A:CR_03730C_A:LYP1:HGT14:SSU1:CR_10770W_A	15798:90517:15840:44550:19740:35434:15677:35672:42144:90518:30447:6631:71996:6821:55085:1904679:316:15903:42710:45454:32974:6820:32975:90516:71216:30476:55088:10038:34659:8272:90515:15719:42938:15718:30150:15847:15858:43335:15680:98849:16226:10509:6749:16560:44182:36180:48250:1904659:15723:1900429:16562:33499:19631:8645:35435:19388:1765:36246:1901481:90514:15757:71214:34599:8643:9267:15729:42908:…
34599	cellular response to oxidative stress	24 out of 444 genes, 5.4%	144 out of 6473 background genes, 2.2%	0.03584	0.03	GAL10:CAT1:HSP21:C2_05060C_A:GRE2:PST1:PST2:DDR48:DOT5:CCP1:GLX3:POS5:GST2:ATG1:GLR1:C5_02110W_A:TRR1:C6_00850W_A:CIP1:MDR1:CCZ1:C7_03350C_A:PTC6:YHB1	1902170:42180:1901098:71248:51701:44237:36245:19243:30447:6281:52565:43547:15903:45454:9272:48278:61709:19674:1315:71216:55114:6468:1904184:7034:46777:70370:42149:1903614:44395:6979:34605:6995:8152:1903715:422:10731:6950:10972:1900436:6970:46210:45892:61191:6741:302:70458:6725:45:42125:6749:6623:70414:34727:42744:44182:33554:36180:98869:7155:71470:19430:1900429:15671:97352:34614:33499:6914:19388:…
Molecular function
GOID	GO_term	Cluster frequency	Background frequency	Corrected P-value	False discovery rate	Gene(s) annotated to the term	Directly Annotated GOID List
16491	oxidoreductase activity	64 out of 444 genes, 14.4%	429 out of 6473 background genes, 6.6%	2.88e-07	0	C1_00410C_A:C1_00630W_A:GOR1:CSH1:IFD6:C1_04460C_A:GLT1:CAT1:ZWF1:AOX2:AOX1:C1_09780C_A:MRF1:CYB2:OSM2:YIM1:C2_05060C_A:C2_05130W_A:GRE2:PST1:IFM3:C2_08100W_A:PST2:C2_08850C_A:IFR1:DOT5:FOX2:ALI1:CCP1:MET13:GTT12:C4_02230C_A:C4_03340C_A:CFL2:GDH3:GUT2:OYE32:IFG3:CFL4:GLR1:C5_02690W_A:TRR1:FET99:C6_00850W_A:OYE2:OYE23:YMX6:POX1:C7_02010C_A:C7_03350C_A:C7_03780C_A:C7_04310C_A:OYE22:LYS12:ADH5:IDP2:…	51536:4460:16652:3955:18456:5506:51287:8270:5507:4090:47018:8198:4032:50625:16722:16491:50236:16614:4368:16747:16620:8379:47770:4364:4791:8762:18685:51269:3997:4489:9916:32542:4033:4096:15930:18576:18484:5515:8199:16655:47046:3857:16966:8137:51268:4362:4300:20037:293:50660:4175:4601:16639:3884:16616:47964:50661:3959:51539:47019:3995:16712:4130:16040:9055:3677:47066:4602:8941:104:3824:8336:19825:1…
48037	cofactor binding	38 out of 444 genes, 8.6%	233 out of 6473 background genes, 3.6%	9.58e-05	0	C1_00630W_A:GAL10:GOR1:GLT1:CAT1:ZWF1:CYB2:OSM2:C2_00390C_A:BNA32:BNA31:BIO32:C2_06710W_A:GRE2:PST1:IFM3:PST2:C2_08850C_A:CCP1:PGA7:RBT5:PDC12:LYS4:ARO9:OYE32:GLR1:OYE2:OYE23:YMX6:POX1:SHM2:LEU1:OYE22:LYS12:DRE2:ALK8:CR_07250C_A:YHB1	51536:8483:4460:3955:5506:51287:16212:50625:16491:4409:16614:8762:18685:3997:287:4096:15930:5515:36137:16655:47046:16966:8793:4362:20037:4034:50660:4601:16639:3978:30246:47964:16616:50661:3959:3995:51539:4121:16712:4130:16040:9055:47804:8941:104:3824:19825:3861:30976:47536:4061:4345:16627:10181:4372:50662:16156:51537:30170
16614	oxidoreductase activity, acting on CH-OH group of donors	17 out of 444 genes, 3.8%	73 out of 6473 background genes, 1.1%	0.00161	0	C1_00630W_A:GOR1:CSH1:IFD6:ZWF1:CYB2:IFM3:C2_08850C_A:FOX2:GUT2:C7_03350C_A:LYS12:ADH5:IDP2:CR_07250C_A:CR_09100C_A:XYL2	4460:16652:18456:51287:8270:4090:47018:4032:16491:50236:16614:4368:16747:8762:51269:4033:47046:3857:51268:4300:20037:50660:47964:16616:50661:47019:3824:3939:4450:4345
50662	coenzyme binding	26 out of 444 genes, 5.9%	152 out of 6473 background genes, 2.3%	0.00299	0	C1_00630W_A:GAL10:GOR1:ZWF1:C2_00390C_A:BNA32:BNA31:BIO32:C2_06710W_A:GRE2:PST1:IFM3:PST2:C2_08850C_A:PDC12:ARO9:OYE32:GLR1:OYE2:OYE23:YMX6:POX1:SHM2:OYE22:LYS12:CR_07250C_A	8483:3955:51287:16212:50625:16491:16614:8762:3997:287:36137:16655:47046:8793:4362:4034:50660:3978:30246:47964:16616:50661:3959:3995:4121:47804:3824:30976:47536:4061:4345:16627:10181:4372:50662:30170
15103	inorganic anion transmembrane transporter activity	10 out of 444 genes, 2.3%	34 out of 6473 background genes, 0.5%	0.01661	0.004	DAL5:DAL9:C3_04360W_A:OAC1:SUL2:C7_04160W_A:CR_01320C_A:GEF2:SSU1:CR_10770W_A	15131:5247:15296:5216:15116:22857:8271:71916:15124:319:1901239:34658
3700	DNA-binding transcription factor activity	31 out of 444 genes, 7.0%	219 out of 6473 background genes, 3.4%	0.0213	0.0033	C1_04560W_A:SIP5:MDM34:ZCF23:CAT8:LYS142:WOR1:STP2:OFI1:C1_13880C_A:ZCF9:ZCF6:STP4:THI20:STB3:C2_10540W_A:ZCF8:ZCF16:ZCF32:TRY4:CTA4:ZCF21:ADR1:ARG83:RGT1:ZNC1:ZCF13:GLN3:CRZ2:UGA33:SUC1	8270:981:978:8972:1094:1093:8902:4842:3714:43565:3713:3677:3700:3676:44212:1228:1102:1227:50334
5215	transporter activity	47 out of 444 genes, 10.6%	393 out of 6473 background genes, 6.1%	0.02694	0.0029	HGT2:PDR16:DUR3:GPT1:C1_06980C_A:C1_07440W_A:CDR4:CTR2:C1_09210C_A:DUR7:HGT20:ITR1:C2_09280C_A:C2_09590C_A:YOR1:DAL5:DAL9:PEP8:CDR11:C3_04360W_A:HGT5:OAC1:HGT17:SUL2:C4_04250W_A:QDR3:MDR1:OPT8:C6_04110W_A:ATM1:MDM12:NUP:YCF1:C7_04160W_A:TPO2:PXA1:CR_01320C_A:CR_01630C_A:HNM3:GEF2:OPT4:HXT5:CR_03580C_A:ADP1:HGT14:SSU1:CR_10770W_A	5365:5375:5313:61459:15131:5247:15296:32934:51119:15203:15204:5216:5355:5290:15116:120013:15606:17111:44604:35673:140318:8429:15194:15431:8028:5524:22857:120015:8271:42626:15127:42910:71916:15535:15124:166:15181:8559:15489:15244:15562:319:15183:16887:15506:1901239:5315:19829:8526:19531:15185:15189:5302:31210:1901611:34658
22857	transmembrane transporter activity	43 out of 444 genes, 9.7%	354 out of 6473 background genes, 5.5%	0.03792	0.015	HGT2:DUR3:GPT1:C1_06980C_A:CDR4:CTR2:C1_09210C_A:DUR7:HGT20:ITR1:C2_09280C_A:C2_09590C_A:YOR1:DAL5:DAL9:CDR11:C3_04360W_A:HGT5:OAC1:HGT17:SUL2:C4_04250W_A:QDR3:MDR1:OPT8:C6_04110W_A:ATM1:NUP:YCF1:C7_04160W_A:TPO2:PXA1:CR_01320C_A:CR_01630C_A:HNM3:GEF2:OPT4:HXT5:CR_03580C_A:ADP1:HGT14:SSU1:CR_10770W_A	5365:5375:5313:61459:15131:5247:15296:51119:15203:15204:5216:5355:5290:15116:15606:17111:44604:35673:15194:15431:8028:5524:22857:8271:42626:15127:42910:71916:15535:15124:166:15181:8559:15489:15244:15562:319:15183:16887:15506:1901239:5315:19829:19531:15185:15189:5302:34658
51119	sugar transmembrane transporter activity	8 out of 444 genes, 1.8%	25 out of 6473 background genes, 0.4%	0.04779	0.0133	HGT2:HGT20:ITR1:C2_09280C_A:HGT5:HGT17:HXT5:HGT14	5365:51119:5355:15535
Cellular component
GOID	GO_term	Cluster frequency	Background frequency	Corrected P-value	False discovery rate	Gene(s) annotated to the term	Directly Annotated GOID List
42579	microbody	18 out of 444 genes, 4.1%	70 out of 6473 background genes, 1.1%	0.00011	0	C1_04560W_A:CAT1:PEX3:ZWF1:MLS1:C1_11010C_A:C2_00390C_A:PEX6:FOX2:CTN3:C3_04800C_A:C5_01350W_A:C6_00850W_A:PEX7:C6_02410W_A:POX1:PXA1:ECI1	5622:5829:5758:9277:5739:5783:5777:5778:5782:5779:16021:34657:5759
5777	peroxisome	18 out of 444 genes, 4.1%	70 out of 6473 background genes, 1.1%	0.00011	0	C1_04560W_A:CAT1:PEX3:ZWF1:MLS1:C1_11010C_A:C2_00390C_A:PEX6:FOX2:CTN3:C3_04800C_A:C5_01350W_A:C6_00850W_A:PEX7:C6_02410W_A:POX1:PXA1:ECI1	5622:5829:5758:9277:5739:5783:5777:5778:5782:5779:16021:5759:34657
5887	integral component of plasma membrane	18 out of 444 genes, 4.1%	105 out of 6473 background genes, 1.6%	0.0439	0.02	HGT2:C1_06980C_A:C1_09210C_A:HGT20:ITR1:C2_09280C_A:DAL5:DAL9:HGT5:HGT17:C4_04250W_A:QDR3:MDR1:TPO2:CR_00420W_A:STE2:HGT14:CR_10770W_A	9986:5739:16020:5887:16021:5886
5811	lipid droplet	10 out of 444 genes, 2.3%	40 out of 6473 background genes, 0.6%	0.04923	0.015	C1_00410C_A:PDR16:C1_04110W_A:SMP2:YIM1:C2_08170W_A:C3_00400C_A:C3_03760W_A:C4_00950C_A:C4_01300W_A	5788:5743:5829:71561:19898:31965:5783:5811:71595:16021:71944:5773:31307
Downregulated gene set
Biological process
GOID	GO_term	Cluster frequency	Background frequency	Corrected P-value	False discovery rate	Gene(s) annotated to the term	Directly Annotated GOID List
6412	translation	78 out of 421 genes, 18.5%	404 out of 6473 background genes, 6.2%	1.82e-16	0	RPL16A:TIF:RPS21B:RPS21:MRP20:RPP1A:RPL13:RPS16A:RPS1:RPL6:C1_03620C_A:C1_04820C_A:C1_05720W_A:RPS14B:RPS22A:C1_06470W_A:RPS23A:C1_06890C_A:DRG1:RPL42:RPS17B:WRS1:RPL27A:RPL14:RPL38:C2_01030W_A:C2_02270C_A:RPL21A:RPS9B:RPL39:RPL17B:C2_04700C_A:C2_05410W_A:C2_05710C_A:RPL11:RPL12:RPL9B:SES1:RPS15:RPP2B:CAM1:RPS12:GCD2:RPS6A:ZUO1:C4_04390W_A:EFB1:RPL30:UBI3:MRP17:tE(UUC)4:C5_01050C_A:C5_01540W_A:RP…	51083:32232:470:6431:469:36180:51726:6413:2000640:44237:1903833:16567:45944:6414:2109:6449:27:30447:32543:28:463:42274:30490:184:6446:6434:447:6422:2182:462:2183:34599:6421:42254:71216:9267:6436:6452:6364:6433:2181:6412:45903:48025:461:6606:1990145:479:45860:42273:1900153:6407:6418:36170:6450:448:56:35690:16236:71456:54
43043	peptide biosynthetic process	78 out of 421 genes, 18.5%	408 out of 6473 background genes, 6.3%	3.4e-16	0	RPL16A:TIF:RPS21B:RPS21:MRP20:RPP1A:RPL13:RPS16A:RPS1:RPL6:C1_03620C_A:C1_04820C_A:C1_05720W_A:RPS14B:RPS22A:C1_06470W_A:RPS23A:C1_06890C_A:DRG1:RPL42:RPS17B:WRS1:RPL27A:RPL14:RPL38:C2_01030W_A:C2_02270C_A:RPL21A:RPS9B:RPL39:RPL17B:C2_04700C_A:C2_05410W_A:C2_05710C_A:RPL11:RPL12:RPL9B:SES1:RPS15:RPP2B:CAM1:RPS12:GCD2:RPS6A:ZUO1:C4_04390W_A:EFB1:RPL30:UBI3:MRP17:tE(UUC)4:C5_01050C_A:C5_01540W_A:RP…	51083:32232:470:6431:469:36180:51726:6413:2000640:44237:1903833:16567:45944:6414:2109:6449:27:30447:32543:28:463:42274:30490:184:6446:6434:447:6422:2182:462:2183:34599:6421:42254:6436:9267:71216:6452:6364:6433:2181:6412:45903:48025:461:6606:1990145:479:45860:42273:1900153:6418:6407:6450:36170:448:56:35690:16236:71456:54
6518	peptide metabolic process	80 out of 421 genes, 19.0%	434 out of 6473 background genes, 6.7%	1.12e-15	0	RPL16A:TIF:RPS21B:RPS21:MRP20:RPP1A:RPL13:RPS16A:RPS1:RPL6:C1_03620C_A:APE2:C1_04820C_A:C1_05720W_A:RPS14B:RPS22A:C1_06470W_A:RPS23A:C1_06890C_A:DRG1:RPL42:RPS17B:WRS1:RPL27A:RPL14:RPL38:C2_01030W_A:C2_02270C_A:RPL21A:RPS9B:RPL39:RPL17B:C2_04700C_A:C2_05410W_A:C2_05710C_A:RPL11:RPL12:RPL9B:SES1:RPS15:RPP2B:CAM1:RPS12:GCD2:RPS6A:ZUO1:C4_04390W_A:EFB1:RPL30:UBI3:MRP17:tE(UUC)4:C5_01050C_A:C5_01540W…	51083:51726:43171:6413:2000640:44237:45944:6449:27:30447:463:42274:6434:447:2182:462:6421:42254:71216:6433:8152:1990145:6450:56:54:32232:470:6431:36180:469:1903833:16567:6414:2109:32543:28:30490:184:6446:6422:120113:2183:34599:9267:6436:6452:6364:2181:6412:45903:461:48025:6606:479:45860:42273:1900153:6407:6418:36170:448:6751:35690:16236:71456
10467	gene expression	144 out of 421 genes, 34.2%	1142 out of 6473 background genes, 17.6%	1.87e-14	0	RPL16A:TIF:RPS21B:RPS21:MRP20:C1_01860W_A:RPP1A:RPL13:RPS16A:RPS1:RPL6:C1_03620C_A:C1_04820C_A:C1_05230W_A:C1_05720W_A:RPS14B:RPS22A:C1_06470W_A:C1_06540C_A:RPS23A:C1_06890C_A:C1_07280C_A:DRG1:BUD31:RPL42:TBP1:RPS17B:C1_11160C_A:C1_11280W_A:WRS1:RPL27A:C1_12440W_A:C1_12820C_A:RPL14:C1_14080W_A:C1_14240W_A:RPC10:RPL38:C2_01030W_A:C2_01510C_A:C2_02270C_A:C2_02630W_A:C2_02710C_A:RPL21A:RPS9B:RPL39:T…	398:60261:6363:32889:36178:51726:70893:44237:6361:45944:1193:55:61408:27:30447:463:42274:31119:42797:6434:70525:6338:45292:6325:42254:6468:71038:8612:294:9113:45899:17183:7114:1990145:100036:226:6450:34427:2001209:71035:6360:6368:44182:1902626:6383:7059:1903833:16567:9249:2109:32543:30490:6355:70898:6351:184:6366:915:90262:2183:34599:9267:44011:16573:30488:282:2181:6412:6342:1990481:17198:48025:4…
43604	amide biosynthetic process	79 out of 421 genes, 18.8%	456 out of 6473 background genes, 7.0%	8.82e-14	0	RPL16A:TIF:RPS21B:RPS21:MRP20:RPP1A:RPL13:RPS16A:RPS1:RPL6:C1_03620C_A:C1_04820C_A:C1_05720W_A:RPS14B:RPS22A:C1_06470W_A:RPS23A:C1_06890C_A:DRG1:RPL42:RPS17B:WRS1:RPL27A:RPL14:RPL38:C2_01030W_A:C2_02270C_A:RPL21A:RPS9B:RPL39:RPL17B:C2_04700C_A:C2_05410W_A:C2_05710C_A:RPL11:RPL12:RPL9B:SES1:RPS15:RPP2B:CAM1:RPS12:GCD2:RPS6A:ZUO1:C4_04390W_A:EFB1:RPL30:UBI3:MRP17:SPE2:tE(UUC)4:C5_01050C_A:C5_01540W…	51726:44237:45944:27:30447:463:42274:6434:42254:1990145:8295:6450:1903833:16567:2109:32543:30490:184:2183:34599:9267:2181:6412:48025:6606:479:42273:6407:36170:448:16236:51083:6597:6413:2000640:6449:447:2182:462:6421:71216:6433:56:54:32232:470:6431:469:36180:6414:28:6446:6422:6436:6452:6364:45903:461:45860:1900153:6418:35690:15940:71456
43603	cellular amide metabolic process	83 out of 421 genes, 19.7%	511 out of 6473 background genes, 7.9%	6.86e-13	0	RPL16A:TIF:RPS21B:RPS21:MRP20:RPP1A:RPL13:RPS16A:RPS1:RPL6:C1_03620C_A:APE2:C1_04820C_A:C1_05720W_A:RPS14B:RPS22A:C1_06470W_A:RPS23A:C1_06890C_A:DRG1:ERG12:RPL42:RPS17B:WRS1:RPL27A:RPL14:RPL38:C2_01030W_A:C2_02270C_A:RPL21A:RPS9B:RPL39:RPL17B:C2_04700C_A:C2_05410W_A:C2_05710C_A:RPL11:RPL12:RPL9B:SES1:RPS15:RPP2B:CAM1:RPS12:GCD2:RPS6A:ZUO1:C4_04390W_A:EFB1:RPL30:UBI3:MRP17:SPE2:tE(UUC)4:C5_01050C_…	51726:43171:44237:45944:27:30447:6084:463:42274:6434:42254:8152:1990145:8295:6450:1903833:16567:2109:6696:32543:30490:184:2183:34599:9267:2181:6412:48025:6606:479:42273:6407:36170:448:6751:16236:51083:10142:6597:6413:2000640:6449:447:2182:462:6421:71216:8299:6433:56:54:32232:470:6431:469:36180:6414:28:6446:6422:120113:6436:6452:6364:45903:461:19287:45860:1900153:6418:35690:15940:71456
44271	cellular nitrogen compound biosynthetic process	117 out of 421 genes, 27.8%	883 out of 6473 background genes, 13.6%	1.88e-12	0	RPL16A:TIF:RPS21B:RPS21:MRP20:C1_01860W_A:RPP1A:RPL13:RPS16A:RPS1:RPL6:C1_03620C_A:C1_04820C_A:C1_05230W_A:C1_05720W_A:RPS14B:RPS22A:C1_06470W_A:RPS23A:C1_06890C_A:C1_07280C_A:DRG1:RPL42:TBP1:RPS17B:WRS1:RPL27A:C1_12820C_A:RPL14:C1_14240W_A:RPC10:RPL38:C2_01030W_A:C2_02270C_A:C2_02630W_A:HPT1:RPL21A:RPS9B:RPL39:TBF1:RPL17B:C2_04700C_A:RPC40:C2_05410W_A:C2_05710C_A:IMH3:RPL11:AAH1:RPA12:PMI1:FCY21…	398:32:60261:6363:9116:43504:1900439:10947:51726:70893:44237:6361:6270:45944:730:1193:61408:27:30447:6281:463:42274:55085:43409:7004:42797:6434:9272:6754:43103:6338:722:71479:6486:42254:6468:72530:19858:6163:9113:45899:34636:1990145:8295:34087:100036:70914:6450:51453:724:1903459:36166:6301:6360:6368:44182:33315:6383:6312:727:6177:1903833:16567:6273:2109:42276:32543:710:30490:6355:70898:6351:184:4…
34645	cellular macromolecule biosynthetic process	119 out of 421 genes, 28.3%	910 out of 6473 background genes, 14.1%	2.71e-12	0	RPL16A:TIF:RPS21B:RPS21:MRP20:C1_01860W_A:RPP1A:RPL13:RPS16A:RPS1:RPL6:C1_03620C_A:C1_04820C_A:C1_05230W_A:C1_05720W_A:RPS14B:RPS22A:C1_06470W_A:RPS23A:C1_06890C_A:C1_07280C_A:DRG1:RPL42:TBP1:RPS17B:WRS1:RPL27A:C1_12820C_A:RPL14:MSH6:C1_14240W_A:RPC10:RPL38:C2_01030W_A:KAR2:C2_02270C_A:C2_02630W_A:RPL21A:RPS9B:RPL39:TBF1:RPL17B:C2_04700C_A:RPC40:C2_05410W_A:C2_05710C_A:RPL11:RPA12:CDC47:PMI1:RPL1…	45861:398:32:60261:6261:6363:43504:36178:1900439:10947:51726:70893:44237:6361:6270:45944:730:1193:61408:27:30447:31589:6281:463:42274:43409:7004:42797:6434:9272:6338:722:71479:6486:42254:71712:6468:43111:9113:45899:742:1900101:34636:1990145:34087:100036:70914:6450:724:1903459:36166:36244:6301:6360:6368:44182:33315:6383:6312:727:35269:1903833:16567:6273:2109:42276:32543:31204:710:30490:6355:70898:…
9059	macromolecule biosynthetic process	119 out of 421 genes, 28.3%	926 out of 6473 background genes, 14.3%	1.03e-11	0	RPL16A:TIF:RPS21B:RPS21:MRP20:C1_01860W_A:RPP1A:RPL13:RPS16A:RPS1:RPL6:C1_03620C_A:C1_04820C_A:C1_05230W_A:C1_05720W_A:RPS14B:RPS22A:C1_06470W_A:RPS23A:C1_06890C_A:C1_07280C_A:DRG1:RPL42:TBP1:RPS17B:WRS1:RPL27A:C1_12820C_A:RPL14:MSH6:C1_14240W_A:RPC10:RPL38:C2_01030W_A:KAR2:C2_02270C_A:C2_02630W_A:RPL21A:RPS9B:RPL39:TBF1:RPL17B:C2_04700C_A:RPC40:C2_05410W_A:C2_05710C_A:RPL11:RPA12:CDC47:PMI1:RPL1…	45861:398:32:60261:6261:6363:43504:36178:1900439:10947:51726:70893:44237:6361:6270:45944:730:1193:61408:27:30447:31589:6281:463:42274:43409:7004:42797:6434:9272:6338:722:71479:6486:42254:71712:6468:43111:9113:45899:742:1900101:34636:1990145:34087:100036:70914:6450:724:1903459:36166:36244:6301:6360:6368:44182:33315:6383:6312:727:35269:1903833:16567:6273:2109:42276:32543:31204:710:30490:6355:70898:…
42254	ribosome biogenesis	57 out of 421 genes, 13.5%	305 out of 6473 background genes, 4.7%	1.15e-10	0	RPS21B:RPS21:C1_02450C_A:RPS16A:RPS1:RPL6:C1_04820C_A:C1_05720W_A:RPS14B:C1_06540C_A:RPS23A:RPS17B:C1_12440W_A:C1_14080W_A:C2_02710C_A:RPS9B:RPL17B:C2_04700C_A:RPF2:RPL11:NOC4:RPS10:MTR2:UTP8:RPL12:C3_04380C_A:RPS15:RPL8B:CAM1:RLP24:RPS6A:ZUO1:RRP42:RPL30:C4_06170C_A:UBI3:FYV5:C5_01540W_A:RPS5:RPS13:RPL25:NIP7:POP4:NOP15:RPS28B:RPS18:LSM6:CR_01710W_A:NHP2:RPS3:CR_07030C_A:CR_07080W_A:RPS27:IMP4:R…	398:45944:55:27:30447:463:42274:42254:71038:294:6450:34427:71035:1902626:16567:2109:30490:915:9267:2181:6412:48025:42256:71042:6606:479:42273:6407:36170:448:16075:51083:45943:2000640:6449:447:462:71216:480:31120:467:56:31118:54:470:469:36180:6406:42255:6414:466:16973:28:8033:6452:6364:45903:34965:461:6409:1900153:6379:472:35690:71456
34641	cellular nitrogen compound metabolic process	175 out of 421 genes, 41.6%	1662 out of 6473 background genes, 25.7%	1.44e-10	0	RPL16A:CDC13:CDC5:TIF:RPS21B:RPS21:MRP20:C1_01860W_A:RPP1A:RPL13:RPS16A:RPS1:RPL6:C1_03620C_A:APE2:C1_04820C_A:C1_05230W_A:C1_05720W_A:RPS14B:RPS22A:C1_06470W_A:C1_06540C_A:RPS23A:C1_06890C_A:C1_07280C_A:DRG1:SAM4:ERG12:BUD31:RPL42:TBP1:RPS17B:C1_11160C_A:C1_11280W_A:WRS1:RPL27A:C1_12440W_A:C1_12820C_A:RPL14:MSH6:C1_14080W_A:C1_14240W_A:RPC10:RPL38:C2_01030W_A:C2_01510C_A:C2_02270C_A:C2_02630W_A:…	32:60261:6261:10947:19284:70893:43171:44237:6361:1903490:45944:730:1193:30447:6281:463:55085:43409:7004:6434:9272:1902542:1402:43103:70525:45292:722:6325:71479:42254:72530:9113:45899:34636:7114:1990145:8295:100036:2001209:1903459:33315:6334:1902626:44182:45793:6312:727:46827:6177:1903833:6273:70481:42276:7127:6351:184:6366:10696:30466:6812:2183:34599:6267:6302:1903469:71042:31936:479:950:10973:20…
44249	cellular biosynthetic process	150 out of 421 genes, 35.6%	1374 out of 6473 background genes, 21.2%	1.45e-09	0	RPL16A:ERG2:TIF:RPS21B:RPS21:MRP20:C1_01860W_A:CYS4:RPP1A:RPL13:RPS16A:RPS1:RPL6:C1_03620C_A:ERG3:C1_04820C_A:C1_05230W_A:C1_05720W_A:RPS14B:RPS22A:C1_06470W_A:RPS23A:C1_06890C_A:C1_07280C_A:DRG1:SAM4:ERG12:RPL42:LKH1:TBP1:RPS17B:WRS1:RPL27A:C1_12820C_A:RPL14:MSH6:C1_14240W_A:RPC10:RPL38:C2_01030W_A:KAR2:C2_01160W_A:C2_02270C_A:C2_02630W_A:HPT1:RPL21A:RPS9B:C2_03830W_A:RPL39:TBF1:ERG10:RPL17B:C2_…	32:60261:6261:70485:10947:19284:70893:44237:6361:6535:45944:730:1193:30447:31589:6281:463:55085:43409:7004:6434:9272:6116:43103:19343:722:19280:71479:42254:71712:72530:9113:45899:742:1900101:34636:1990145:8295:100036:6673:1903459:33315:44182:6312:727:6177:1903833:6273:42276:6351:184:6366:30466:6812:2183:34599:7089:30163:6267:6302:1903469:46354:6616:31936:479:950:1015:6508:9405:33314:51083:6269:72…
9058	biosynthetic process	151 out of 421 genes, 35.9%	1426 out of 6473 background genes, 22.0%	1.5e-08	0	RPL16A:ERG2:TIF:RPS21B:RPS21:MRP20:C1_01860W_A:CYS4:RPP1A:RPL13:RPS16A:RPS1:RPL6:C1_03620C_A:ERG3:C1_04820C_A:C1_05230W_A:C1_05720W_A:RPS14B:RPS22A:C1_06470W_A:RPS23A:C1_06890C_A:C1_07280C_A:DRG1:SAM4:ERG12:RPL42:LKH1:TBP1:RPS17B:WRS1:RPL27A:C1_12820C_A:RPL14:MSH6:C1_14240W_A:RPC10:RPL38:C2_01030W_A:KAR2:C2_01160W_A:C2_02270C_A:C2_02630W_A:HPT1:RPL21A:RPS9B:C2_03830W_A:RPL39:TBF1:ERG10:RPL17B:C2_…	32:60261:6261:70485:10947:19284:70893:44237:6361:6535:45944:730:1193:30447:31589:6281:463:55085:43409:7004:6434:9272:6116:43103:19343:722:19280:71479:42254:71712:72530:9113:45899:742:1900101:34636:1990145:8295:100036:6673:226:1903459:33315:44182:6312:727:6177:1903833:6273:42276:6351:184:6366:30466:6812:2183:34599:7089:30163:6267:6302:1903469:46354:6616:31936:479:950:1015:6508:9405:33314:51083:626…
1901576	organic substance biosynthetic process	147 out of 421 genes, 34.9%	1385 out of 6473 background genes, 21.4%	2.82e-08	0	RPL16A:ERG2:TIF:RPS21B:RPS21:MRP20:C1_01860W_A:CYS4:RPP1A:RPL13:RPS16A:RPS1:RPL6:C1_03620C_A:ERG3:C1_04820C_A:C1_05230W_A:C1_05720W_A:RPS14B:RPS22A:C1_06470W_A:RPS23A:C1_06890C_A:C1_07280C_A:DRG1:SAM4:ERG12:RPL42:LKH1:TBP1:RPS17B:WRS1:RPL27A:C1_12820C_A:RPL14:MSH6:C1_14240W_A:RPC10:RPL38:C2_01030W_A:KAR2:C2_01160W_A:C2_02270C_A:C2_02630W_A:HPT1:RPL21A:RPS9B:RPL39:TBF1:ERG10:RPL17B:C2_04700C_A:RPC…	32:60261:6261:70485:10947:19284:70893:44237:6361:6535:45944:730:1193:30447:31589:6281:463:55085:43409:7004:6434:9272:6116:43103:19343:722:19280:71479:42254:71712:72530:9113:45899:742:1900101:34636:1990145:8295:100036:6673:1903459:33315:44182:6312:727:6177:1903833:6273:42276:6351:184:6366:30466:6812:2183:34599:7089:30163:6267:6302:1903469:46354:6616:31936:479:950:1015:6508:9405:33314:51083:6269:72…
34660	ncRNA metabolic process	58 out of 421 genes, 13.8%	373 out of 6473 background genes, 5.8%	1.94e-07	0	RPS21B:RPS16A:RPS1:C1_05720W_A:RPS14B:C1_06540C_A:RPS23A:C1_11160C_A:WRS1:C1_12440W_A:C1_14080W_A:C2_01510C_A:C2_02710C_A:RPS9B:TBF1:RPL17B:C2_04700C_A:RPF2:KTI11:C2_05670C_A:C2_06480W_A:NOC4:C2_09310C_A:SMM1:UTP8:SES1:C3_04380C_A:RPL8B:RPS6A:SEN2:ZUO1:RRP42:C4_04810C_A:RPL30:UBI3:FYV5:C5_01540W_A:C5_01610W_A:MES1:RPS13:NIP7:POP4:C7_00330C_A:NOP15:RPS28B:RPS18:C7_03660C_A:DED81:LSM6:DPS1-1:NHP2:C…	45944:463:6434:70525:42254:7114:1902626:34599:71042:31936:479:1015:98787:51083:2143:34227:723:2000640:2939:447:379:6421:480:6388:9303:467:10833:6400:31118:6431:1522:6422:6452:32211:106004:45903:1403:6409:1900153:6379:472:71456:398:27:42274:31119:71038:294:70681:17183:6450:34427:71035:16567:2109:30490:915:30488:2181:6412:1990481:48025:42256:6606:2949:42273:6407:448:16075:45943:32447:462:55114:6433…
43170	macromolecule metabolic process	197 out of 421 genes, 46.8%	2109 out of 6473 background genes, 32.6%	2.76e-07	0	RPL16A:CDC13:CDC5:TIF:RPS21B:RPS21:MRP20:C1_01860W_A:RPP1A:RPL13:RPS16A:RPS1:RPL6:C1_03620C_A:ELA1:SSA2:C1_04820C_A:C1_05230W_A:C1_05720W_A:RPS14B:RPS22A:C1_06470W_A:C1_06540C_A:RPS23A:C1_06890C_A:C1_07280C_A:DRG1:BUD31:C1_09910C_A:RPL42:LKH1:TBP1:RPS17B:C1_11160C_A:C1_11280W_A:WRS1:RPL27A:C1_12440W_A:C1_12820C_A:RPL14:MSH6:C1_14080W_A:C1_14240W_A:RPC10:RPL38:SAS2:C2_01030W_A:KAR2:C2_01510C_A:C2_…	32:60261:6261:32889:10947:45324:70893:1903338:44237:6361:1903490:45944:730:1193:55:30447:31589:6281:463:43409:7004:6434:9272:1902542:1402:70525:45292:722:6325:71479:42254:71712:18027:9113:45899:742:1900101:34636:7114:1990145:100036:226:2001209:1903459:33315:6334:1902626:35719:44182:34975:45793:6312:727:46827:1903833:6511:6273:71470:70481:42276:34629:7127:1900190:6351:184:6366:10696:42026:30466:21…
22613	ribonucleoprotein complex biogenesis	57 out of 421 genes, 13.5%	376 out of 6473 background genes, 5.8%	7.8e-07	0	RPS21B:RPS21:C1_02450C_A:RPS16A:RPS1:RPL6:C1_04820C_A:C1_05720W_A:RPS14B:C1_06540C_A:RPS23A:RPS17B:C1_12440W_A:C1_14080W_A:C2_02710C_A:RPS9B:RPL17B:C2_04700C_A:RPF2:RPL11:NOC4:RPS10:MTR2:UTP8:RPL12:C3_04380C_A:RPS15:RPL8B:CAM1:RLP24:RPS6A:ZUO1:RRP42:RPL30:C4_06170C_A:UBI3:FYV5:C5_01540W_A:RPS5:RPS13:RPL25:NIP7:POP4:NOP15:RPS28B:RPS18:LSM6:CR_01710W_A:NHP2:RPS3:CR_07030C_A:CR_07080W_A:RPS27:IMP4:R…	45944:55:30447:463:42254:1902626:71042:479:51083:2000640:447:480:467:31118:6414:6452:45903:6409:1900153:6379:472:71456:398:27:42274:71038:294:6450:34427:71035:16567:2109:30490:915:9267:2181:6412:48025:42256:6606:42273:6407:36170:448:16075:45943:6449:462:71216:31120:56:54:470:469:36180:6406:42255:466:16973:28:8033:6364:34965:461:35690
6364	rRNA processing	40 out of 421 genes, 9.5%	218 out of 6473 background genes, 3.4%	1.31e-06	0	RPS21B:RPS16A:RPS1:C1_05720W_A:RPS14B:C1_06540C_A:RPS23A:C1_12440W_A:C1_14080W_A:C2_02710C_A:RPS9B:RPL17B:C2_04700C_A:RPF2:NOC4:UTP8:C3_04380C_A:RPL8B:RPS6A:ZUO1:RRP42:RPL30:UBI3:FYV5:C5_01540W_A:RPS13:NIP7:POP4:NOP15:RPS28B:RPS18:LSM6:NHP2:CR_07030C_A:CR_07080W_A:RPS27:IMP4:RPS20:CR_09740W_A:POP3	463:42254:1902626:71042:479:51083:2000640:447:480:467:31118:6452:45903:6409:1900153:6379:472:71456:398:27:42274:71038:294:6450:34427:71035:16567:2109:30490:915:2181:6412:48025:42256:6606:42273:6407:448:16075:45943:462:31120:56:54:470:469:42255:466:16973:28:8033:6364:34965:461:35690
42797	tRNA transcription by RNA polymerase III	11 out of 421 genes, 2.6%	18 out of 6473 background genes, 0.3%	1.81e-06	0	C1_01860W_A:C1_05230W_A:C1_12820C_A:RPC10:RPC40:C4_03040W_A:RPO26:C6_03210C_A:C7_01210C_A:RPC19:CR_02890C_A	70893:1193:45899:6351:6366:31440:6384:6362:42797:6360:6368:6383:6355:31564:32968:6367:42493
9304	tRNA transcription	11 out of 421 genes, 2.6%	18 out of 6473 background genes, 0.3%	1.81e-06	0	C1_01860W_A:C1_05230W_A:C1_12820C_A:RPC10:RPC40:C4_03040W_A:RPO26:C6_03210C_A:C7_01210C_A:RPC19:CR_02890C_A	70893:1193:45899:6351:6366:31440:6384:6362:42797:6360:6368:6383:6355:31564:32968:6367:42493
34470	ncRNA processing	50 out of 421 genes, 11.9%	316 out of 6473 background genes, 4.9%	2.2e-06	0	RPS21B:RPS16A:RPS1:C1_05720W_A:RPS14B:C1_06540C_A:RPS23A:C1_11160C_A:C1_12440W_A:C1_14080W_A:C2_01510C_A:C2_02710C_A:RPS9B:RPL17B:C2_04700C_A:RPF2:KTI11:C2_05670C_A:C2_06480W_A:NOC4:SMM1:UTP8:C3_04380C_A:RPL8B:RPS6A:SEN2:ZUO1:RRP42:C4_04810C_A:RPL30:UBI3:FYV5:C5_01540W_A:C5_01610W_A:RPS13:NIP7:POP4:C7_00330C_A:NOP15:RPS28B:RPS18:LSM6:NHP2:CR_07030C_A:CR_07080W_A:RPS27:IMP4:RPS20:CR_09740W_A:POP3	463:70525:42254:7114:1902626:34599:71042:479:98787:51083:2143:34227:723:2000640:2939:447:379:480:6388:467:6400:31118:1522:6452:106004:45903:1403:6409:1900153:6379:472:71456:398:27:42274:31119:71038:294:17183:6450:34427:71035:16567:2109:30490:915:30488:2181:6412:1990481:48025:42256:6606:2949:42273:6407:448:16075:45943:32447:462:55114:31120:56:54:470:469:42255:466:16973:28:8033:2098:6364:34965:461:…
16070	RNA metabolic process	92 out of 421 genes, 21.9%	776 out of 6473 background genes, 12.0%	2.51e-06	0	RPS21B:C1_01860W_A:RPS16A:RPS1:C1_05230W_A:C1_05720W_A:RPS14B:C1_06540C_A:RPS23A:C1_07280C_A:BUD31:TBP1:C1_11160C_A:C1_11280W_A:WRS1:C1_12440W_A:C1_12820C_A:C1_14080W_A:C1_14240W_A:RPC10:C2_01510C_A:C2_02630W_A:C2_02710C_A:RPS9B:TBF1:RPL17B:C2_04700C_A:RPF2:RPC40:KTI11:C2_05670C_A:SMD2:C2_06480W_A:RPA12:NOC4:C2_09310C_A:SMM1:UTP8:SES1:HTA3:C3_04380C_A:RPL8B:SUB2:RPS6A:HFL2:SEN2:ZUO1:C4_03040W_A:R…	60261:70893:6361:45944:1193:30447:6281:463:6434:70525:45292:722:6325:42254:9113:45899:7114:100036:2001209:44182:6334:1902626:70481:6351:184:6366:30466:34599:6302:1903469:71042:31936:479:2001208:1015:98787:51083:2143:6269:34227:723:2000640:6353:2939:6337:6286:35753:2000679:447:6348:379:6421:6303:480:6388:6260:9303:467:10833:18105:6400:31118:43486:6431:734:1522:46084:6422:31440:6452:32211:106004:12…
44260	cellular macromolecule metabolic process	164 out of 421 genes, 39.0%	1707 out of 6473 background genes, 26.4%	3.98e-06	0	RPL16A:CDC13:CDC5:TIF:RPS21B:RPS21:MRP20:C1_01860W_A:RPP1A:RPL13:RPS16A:RPS1:RPL6:C1_03620C_A:ELA1:SSA2:C1_04820C_A:C1_05230W_A:C1_05720W_A:RPS14B:RPS22A:C1_06470W_A:C1_06540C_A:RPS23A:C1_06890C_A:C1_07280C_A:DRG1:C1_09910C_A:RPL42:TBP1:RPS17B:C1_11160C_A:WRS1:RPL27A:C1_12820C_A:RPL14:MSH6:C1_14240W_A:RPC10:RPL38:SAS2:C2_01030W_A:KAR2:C2_02270C_A:C2_02630W_A:C2_03130W_A:RPL21A:RPS9B:C2_03830W_A:R…	32:60261:6261:32889:10947:45324:70893:1903338:44237:6361:1903490:45944:730:1193:30447:31589:6281:463:43409:7004:6434:9272:1902542:1402:70525:722:6325:71479:42254:71712:18027:9113:45899:742:1900101:34636:7114:1990145:100036:226:1903459:33315:6334:35719:44182:34975:45793:6312:727:46827:1903833:6511:6273:71470:70481:42276:34629:7127:1900190:6351:184:6366:10696:42026:30466:2183:34599:6267:34517:6302:…
42274	ribosomal small subunit biogenesis	27 out of 421 genes, 6.4%	118 out of 6473 background genes, 1.8%	5.63e-06	0	RPS21B:RPS16A:RPS1:RPS14B:RPS23A:RPS17B:C1_14080W_A:C2_02710C_A:RPS9B:C2_04700C_A:NOC4:UTP8:C3_04380C_A:RPS6A:UBI3:FYV5:C5_01540W_A:RPS13:RPS28B:RPS18:LSM6:CR_01710W_A:CR_07030C_A:RPS27:IMP4:RPS20:CR_09740W_A	42254:479:2000640:447:480:45903:6409:1900153:472:71456:398:42274:6450:16567:2109:30490:6412:6606:6407:45943:462:56:469:28:6364:461:35690
16072	rRNA metabolic process	40 out of 421 genes, 9.5%	230 out of 6473 background genes, 3.6%	6.67e-06	0	RPS21B:RPS16A:RPS1:C1_05720W_A:RPS14B:C1_06540C_A:RPS23A:C1_12440W_A:C1_14080W_A:C2_02710C_A:RPS9B:RPL17B:C2_04700C_A:RPF2:NOC4:UTP8:C3_04380C_A:RPL8B:RPS6A:ZUO1:RRP42:RPL30:UBI3:FYV5:C5_01540W_A:RPS13:NIP7:POP4:NOP15:RPS28B:RPS18:LSM6:NHP2:CR_07030C_A:CR_07080W_A:RPS27:IMP4:RPS20:CR_09740W_A:POP3	463:42254:1902626:71042:479:51083:2000640:447:480:467:31118:6452:45903:6409:1900153:6379:472:71456:398:27:42274:71038:294:6450:34427:71035:16567:2109:30490:915:2181:6412:48025:42256:6606:42273:6407:448:16075:45943:462:31120:56:54:470:469:42255:466:16973:28:8033:6364:34965:461:35690
44238	primary metabolic process	229 out of 421 genes, 54.4%	2654 out of 6473 background genes, 41.0%	7.71e-06	0	RPL16A:CDC13:ERG2:CDC5:TIF:RPS21B:RPS21:MRP20:C1_01860W_A:CYS4:RPP1A:RPL13:RPS16A:RPS1:RPL6:C1_03620C_A:ELA1:SSA2:ERG3:C1_04820C_A:C1_05230W_A:C1_05720W_A:RPS14B:RPS22A:C1_06470W_A:C1_06540C_A:RPS23A:C1_06890C_A:C1_07280C_A:DRG1:SAM4:ERG12:BUD31:C1_09910C_A:RPL42:GLY1:LKH1:TBP1:RPS17B:C1_10960W_A:C1_11160C_A:C1_11280W_A:WRS1:RPL27A:C1_12440W_A:C1_12820C_A:RPL14:MSH6:C1_14080W_A:C1_14240W_A:RPC10:…	32:60261:6261:32889:10947:19284:45324:70893:1903338:44237:6361:6535:1903490:45944:730:1193:30447:31589:6281:463:55085:43409:7004:6434:9272:1902542:1402:6116:43103:70525:45292:19343:722:6325:19280:71479:42254:71712:72530:18027:9113:45899:742:1900101:34636:7114:1990145:100036:226:6673:2001209:1903459:6090:33315:6334:1902626:35719:44182:34975:45793:6312:727:46827:6177:1903833:6511:6273:71470:70481:4…
1901566	organonitrogen compound biosynthetic process	96 out of 421 genes, 22.8%	846 out of 6473 background genes, 13.1%	1.06e-05	0	RPL16A:TIF:RPS21B:RPS21:MRP20:CYS4:RPP1A:RPL13:RPS16A:RPS1:RPL6:C1_03620C_A:C1_04820C_A:C1_05720W_A:RPS14B:RPS22A:C1_06470W_A:RPS23A:C1_06890C_A:DRG1:SAM4:RPL42:RPS17B:WRS1:RPL27A:RPL14:RPL38:C2_01030W_A:C2_01160W_A:C2_02270C_A:HPT1:RPL21A:RPS9B:RPL39:RPL17B:C2_04700C_A:C2_05410W_A:C2_05710C_A:IMH3:RPL11:AAH1:PMI1:PMA1:RPL12:RPL9B:SES1:RPS15:RPP2B:CAM1:GDA1:RPS12:GCD2:RPS6A:ZUO1:C4_04390W_A:EFB1:…	32:19284:44237:6535:45944:30447:31589:463:55085:6434:9272:43103:19343:19280:42254:71712:9113:1900101:1990145:8295:100036:6673:44182:6177:1903833:184:6812:2183:34599:7089:46354:479:9405:51083:2000640:44416:2000679:447:2182:6421:36187:6665:32232:30148:6431:44249:36164:6414:6534:1904263:46084:9168:50667:6493:6422:9298:6506:6452:45903:32264:1900153:70814:71456:45861:9116:36178:51726:27:42274:6754:633…
6807	nitrogen compound metabolic process	215 out of 421 genes, 51.1%	2462 out of 6473 background genes, 38.0%	1.44e-05	0	RPL16A:CDC13:CDC5:TIF:RPS21B:RPS21:MRP20:C1_01860W_A:CYS4:RPP1A:RPL13:RPS16A:RPS1:RPL6:C1_03620C_A:ELA1:SSA2:APE2:C1_04820C_A:C1_05230W_A:C1_05720W_A:RPS14B:RPS22A:C1_06470W_A:C1_06540C_A:RPS23A:C1_06890C_A:C1_07280C_A:DRG1:SAM4:ERG12:BUD31:C1_09910C_A:RPL42:GLY1:LKH1:TBP1:RPS17B:C1_10960W_A:C1_11160C_A:C1_11280W_A:WRS1:RPL27A:C1_12440W_A:C1_12820C_A:RPL14:MSH6:C1_14080W_A:C1_14240W_A:RPC10:RPL38…	32:60261:6261:32889:10947:19284:45324:70893:43171:1903338:44237:6361:6535:1903490:45944:730:1193:30447:31589:6281:463:55085:43409:7004:6434:9272:1902542:1402:43103:70525:45292:19343:722:6325:19280:71479:42254:71712:72530:18027:9113:45899:742:1900101:34636:7114:1990145:8295:100036:226:6673:2001209:1903459:6090:33315:6334:1902626:35719:44182:34975:45793:6312:727:46827:6177:1903833:6511:6273:71470:7…
44267	cellular protein metabolic process	118 out of 421 genes, 28.0%	1147 out of 6473 background genes, 17.7%	4.62e-05	0	RPL16A:CDC5:TIF:RPS21B:RPS21:MRP20:RPP1A:RPL13:RPS16A:RPS1:RPL6:C1_03620C_A:ELA1:SSA2:C1_04820C_A:C1_05720W_A:RPS14B:RPS22A:C1_06470W_A:RPS23A:C1_06890C_A:C1_07280C_A:DRG1:C1_09910C_A:RPL42:RPS17B:C1_11160C_A:WRS1:RPL27A:RPL14:RPL38:SAS2:C2_01030W_A:KAR2:C2_02270C_A:C2_03130W_A:RPL21A:RPS9B:C2_03830W_A:RPL39:RPL17B:C2_04700C_A:C2_05410W_A:KTI11:C2_05710C_A:RPL11:C2_07290W_A:C2_07920W_A:CCT2:PMI1:…	32:32889:45324:1903338:44237:1903490:45944:30447:31589:6281:463:6434:9272:1902542:1402:70525:722:42254:71712:18027:742:1900101:7114:1990145:226:33315:35719:44182:34975:45793:46827:1903833:6511:71470:34629:1900190:184:6366:10696:42026:2183:34599:34517:46354:17198:6616:10570:479:18364:10973:34613:9405:33314:51083:2143:1903353:90344:51568:34227:723:2000640:433:70887:2000220:30433:6464:18013:447:2182…
71704	organic substance metabolic process	236 out of 421 genes, 56.1%	2828 out of 6473 background genes, 43.7%	0.0001	0	RPL16A:CDC13:ERG2:CDC5:TIF:RPS21B:RPS21:MRP20:C1_01860W_A:CYS4:RPP1A:RPL13:RPS16A:RPS1:RPL6:C1_03620C_A:ELA1:SSA2:APE2:ERG3:C1_04820C_A:C1_05230W_A:C1_05720W_A:RPS14B:RPS22A:C1_06470W_A:C1_06540C_A:RPS23A:C1_06890C_A:C1_07280C_A:DRG1:SAM4:ERG12:BUD31:C1_09910C_A:RPL42:GLY1:LKH1:TBP1:RPS17B:C1_10960W_A:C1_11160C_A:C1_11280W_A:WRS1:RPL27A:C1_12440W_A:C1_12820C_A:RPL14:MSH6:C1_14080W_A:C1_14240W_A:R…	32:60261:6261:32889:70485:10947:19284:45324:70893:43171:1903338:44237:6361:6535:1903490:45944:730:1193:55:30447:31589:6281:463:55085:43409:7004:6434:9272:1902542:1402:6116:43103:70525:45292:19343:722:6325:19280:71479:42254:71712:72530:18027:9113:45899:742:1900101:34636:7114:1990145:8295:100036:226:6673:2001209:1903459:6090:33315:6334:1902626:35719:44182:34975:6662:45793:6312:727:46827:6177:190383…
30490	maturation of SSU-rRNA	23 out of 421 genes, 5.5%	102 out of 6473 background genes, 1.6%	0.0001	0	RPS21B:RPS16A:RPS1:RPS14B:RPS23A:C1_14080W_A:RPS9B:C2_04700C_A:NOC4:UTP8:C3_04380C_A:RPS6A:UBI3:FYV5:C5_01540W_A:RPS13:RPS28B:RPS18:LSM6:CR_07030C_A:RPS27:RPS20:CR_09740W_A	42254:479:2000640:447:480:45903:6409:1900153:472:71456:398:42274:6450:16567:2109:30490:6412:6606:6407:45943:462:56:469:28:6364:461:35690
6396	RNA processing	59 out of 421 genes, 14.0%	451 out of 6473 background genes, 7.0%	0.0001	0	RPS21B:RPS16A:RPS1:C1_05720W_A:RPS14B:C1_06540C_A:RPS23A:BUD31:C1_11160C_A:C1_11280W_A:C1_12440W_A:C1_14080W_A:C2_01510C_A:C2_02710C_A:RPS9B:RPL17B:C2_04700C_A:RPF2:KTI11:C2_05670C_A:SMD2:C2_06480W_A:NOC4:SMM1:UTP8:C3_04380C_A:RPL8B:SUB2:RPS6A:SEN2:ZUO1:RRP42:C4_04810C_A:RPL30:UBI3:C5_00920W_A:FYV5:SMD3:C5_01540W_A:C5_01610W_A:C5_04630W_A:C6_00530C_A:RPS13:NIP7:POP4:C7_00330C_A:NOP15:RPS28B:RPS18…	463:70525:45292:6325:42254:7114:2001209:1902626:34599:71042:479:2001208:98787:51083:2143:34227:723:2000640:2939:447:6348:379:480:6388:467:6400:31118:1522:6452:106004:45903:1403:6409:1900153:6379:31124:472:71456:6370:398:27:42274:31119:71038:294:17183:6450:34427:71035:6368:7059:16567:2109:30490:6355:915:90262:30488:282:2181:6412:6342:1990481:48025:42256:6283:6606:2949:42273:6407:448:16075:45943:83…
98781	ncRNA transcription	16 out of 421 genes, 3.8%	53 out of 6473 background genes, 0.8%	0.00013	0	C1_01860W_A:C1_05230W_A:TBP1:C1_12820C_A:RPC10:C2_02630W_A:TBF1:RPC40:RPA12:C4_03040W_A:RPO26:C6_03210C_A:C7_01210C_A:CR_01950W_A:RPC19:CR_02890C_A	60261:70893:6361:45944:1193:45899:6351:6366:31936:1015:6353:9303:10833:31440:32211:122:6384:42790:6362:6363:42797:6360:6368:6383:6355:70898:31564:51123:32968:6367:42493
6383	transcription by RNA polymerase III	12 out of 421 genes, 2.9%	30 out of 6473 background genes, 0.5%	0.00016	0	C1_01860W_A:C1_05230W_A:TBP1:C1_12820C_A:RPC10:RPC40:C4_03040W_A:RPO26:C6_03210C_A:C7_01210C_A:RPC19:CR_02890C_A	70893:6361:1193:45899:6351:6366:31440:6384:42790:6362:42797:6360:6368:6383:6355:70898:31564:51123:32968:6367:42493
90304	nucleic acid metabolic process	107 out of 421 genes, 25.4%	1038 out of 6473 background genes, 16.0%	0.00023	0	CDC13:CDC5:RPS21B:C1_01860W_A:RPS16A:RPS1:C1_05230W_A:C1_05720W_A:RPS14B:C1_06540C_A:RPS23A:C1_07280C_A:BUD31:TBP1:C1_11160C_A:C1_11280W_A:WRS1:C1_12440W_A:C1_12820C_A:MSH6:C1_14080W_A:C1_14240W_A:RPC10:C2_01510C_A:C2_02630W_A:C2_02710C_A:RPS9B:TBF1:RPL17B:C2_04700C_A:RPF2:RPC40:KTI11:C2_05670C_A:SMD2:C2_06480W_A:RPA12:NOC4:CDC47:C2_09310C_A:SMM1:UTP8:SES1:HTA3:RAD53:C3_04380C_A:RPL8B:SUB2:RPS6A:…	60261:6261:10947:70893:6361:1903490:45944:730:1193:30447:6281:463:43409:7004:6434:1902542:1402:70525:45292:722:6325:71479:42254:9113:45899:34636:7114:100036:2001209:1903459:33315:6334:1902626:44182:45793:6312:727:46827:6273:70481:42276:7127:6351:184:6366:10696:30466:34599:6267:6302:1903469:71042:31936:479:10973:2001208:1015:98787:9405:33314:51083:2143:6269:1903353:34227:723:1902394:2000640:70887:…
44237	cellular metabolic process	235 out of 421 genes, 55.8%	2841 out of 6473 background genes, 43.9%	0.00027	0	RPL16A:CDC13:ERG2:CDC5:TIF:RPS21B:RPS21:MRP20:C1_01860W_A:CYS4:RPP1A:RPL13:RPS16A:RPS1:RPL6:C1_03620C_A:ELA1:SSA2:APE2:ERG3:C1_04820C_A:C1_05230W_A:C1_05720W_A:RPS14B:RPS22A:C1_06470W_A:C1_06540C_A:RPS23A:C1_06890C_A:C1_07280C_A:DRG1:SAM4:ERG12:BUD31:C1_09910C_A:RPL42:GLY1:LKH1:TBP1:RPS17B:C1_10960W_A:C1_11160C_A:C1_11280W_A:EGD1:WRS1:RPL27A:C1_12440W_A:C1_12820C_A:RPL14:MSH6:C1_14080W_A:C1_14240…	32:60261:6261:32889:70485:10947:19284:45324:70893:43171:1903338:44237:6361:6535:1903490:45944:730:1193:30447:31589:6281:463:55085:43409:7004:6434:9272:1902542:1402:6116:43103:70525:45292:19343:722:6325:19280:71479:42254:71712:72530:18027:9113:45899:742:1900101:34636:7114:1990145:8295:100036:226:6673:2001209:1903459:6090:33315:6334:1902626:35719:44182:34975:45793:6312:727:46827:6177:1903833:6511:6…
42255	ribosome assembly	15 out of 421 genes, 3.6%	50 out of 6473 background genes, 0.8%	0.00037	0	RPL6:RPS14B:RPS17B:C1_12440W_A:C2_02710C_A:RPF2:RPL11:RPL12:UBI3:C5_01540W_A:RPL25:NIP7:RPS28B:CR_07080W_A:RPS27	30447:463:42254:1902626:479:1900153:27:16567:2109:30490:9267:2181:6412:42256:42273:6407:36170:462:71216:56:54:469:36180:42255:466:28:6364:35690
6139	nucleobase-containing compound metabolic process	119 out of 421 genes, 28.3%	1205 out of 6473 background genes, 18.6%	0.00041	0	CDC13:CDC5:RPS21B:C1_01860W_A:RPS16A:RPS1:C1_05230W_A:C1_05720W_A:RPS14B:C1_06540C_A:RPS23A:C1_07280C_A:SAM4:ERG12:BUD31:TBP1:C1_11160C_A:C1_11280W_A:WRS1:C1_12440W_A:C1_12820C_A:MSH6:C1_14080W_A:C1_14240W_A:RPC10:C2_01510C_A:C2_02630W_A:C2_02710C_A:HPT1:RPS9B:TBF1:RPL17B:C2_04700C_A:RPF2:RPC40:KTI11:C2_05670C_A:SMD2:IMH3:C2_06480W_A:AAH1:RPA12:NOC4:CDC47:C2_09310C_A:PMI1:SMM1:FCY21:UTP8:PMA1:SES…	32:60261:6261:10947:19284:70893:6361:1903490:45944:730:1193:30447:6281:463:55085:43409:7004:6434:9272:1902542:1402:43103:70525:45292:722:6325:71479:42254:72530:9113:45899:34636:7114:100036:2001209:1903459:33315:6334:1902626:44182:45793:6312:727:46827:6177:6273:70481:42276:7127:6351:184:6366:10696:30466:6812:34599:6267:6302:1903469:71042:31936:479:10973:2001208:1015:98787:9405:33314:51083:2143:626…
19538	protein metabolic process	119 out of 421 genes, 28.3%	1215 out of 6473 background genes, 18.8%	0.00065	0	RPL16A:CDC5:TIF:RPS21B:RPS21:MRP20:RPP1A:RPL13:RPS16A:RPS1:RPL6:C1_03620C_A:ELA1:SSA2:C1_04820C_A:C1_05720W_A:RPS14B:RPS22A:C1_06470W_A:RPS23A:C1_06890C_A:C1_07280C_A:DRG1:C1_09910C_A:RPL42:LKH1:RPS17B:C1_11160C_A:WRS1:RPL27A:RPL14:RPL38:SAS2:C2_01030W_A:KAR2:C2_02270C_A:C2_03130W_A:RPL21A:RPS9B:C2_03830W_A:RPL39:RPL17B:C2_04700C_A:C2_05410W_A:KTI11:C2_05710C_A:RPL11:C2_07290W_A:C2_07920W_A:CCT2:…	32:32889:45324:1903338:44237:1903490:45944:30447:31589:6281:463:6434:9272:1902542:1402:70525:722:42254:71712:18027:742:1900101:7114:1990145:226:33315:35719:44182:34975:45793:46827:1903833:6511:71470:34629:1900190:184:6366:10696:42026:2183:34599:30163:34517:46354:17198:6616:10570:479:18364:10973:34613:6508:9405:33314:51083:2143:1903353:90344:51568:34227:723:2000640:433:70887:2000220:30433:6464:180…
462	maturation of SSU-rRNA from tricistronic rRNA transcript (SSU-rRNA, 5.8S rRNA, LSU-rRNA)	20 out of 421 genes, 4.8%	91 out of 6473 background genes, 1.4%	0.00114	0	RPS21B:RPS16A:RPS1:RPS14B:RPS23A:C1_14080W_A:RPS9B:C2_04700C_A:NOC4:UTP8:C3_04380C_A:RPS6A:FYV5:C5_01540W_A:RPS13:RPS18:CR_07030C_A:RPS27:RPS20:CR_09740W_A	42254:479:2000640:447:480:45903:6409:472:71456:398:42274:6450:6412:6606:6407:45943:462:469:28:6364:461:35690
1901360	organic cyclic compound metabolic process	127 out of 421 genes, 30.2%	1353 out of 6473 background genes, 20.9%	0.00251	0	CDC13:ERG2:CDC5:RPS21B:C1_01860W_A:RPS16A:RPS1:ERG3:C1_05230W_A:C1_05720W_A:RPS14B:C1_06540C_A:RPS23A:C1_07280C_A:SAM4:ERG12:BUD31:TBP1:C1_11160C_A:C1_11280W_A:WRS1:C1_12440W_A:C1_12820C_A:MSH6:C1_14080W_A:C1_14240W_A:RPC10:C2_01510C_A:C2_02630W_A:C2_02710C_A:HPT1:RPS9B:TBF1:ERG10:RPL17B:C2_04700C_A:RPF2:RPC40:KTI11:C2_05670C_A:SMD2:IMH3:C2_06480W_A:AAH1:RPA12:NOC4:CDC47:C2_09310C_A:ERG24:PMI1:SM…	32:60261:6261:70485:10947:19284:70893:6361:1903490:45944:730:1193:30447:6281:463:55085:43409:7004:6434:9272:1902542:1402:43103:70525:45292:722:6325:71479:42254:72530:9113:45899:34636:7114:100036:2001209:1903459:33315:6334:1902626:44182:45793:6312:727:46827:6177:6273:70481:42276:7127:6351:184:6366:10696:30466:6812:34599:6267:6302:1903469:71042:31936:479:950:10973:2001208:1015:98787:9405:33314:5108…
51029	rRNA transport	7 out of 421 genes, 1.7%	12 out of 6473 background genes, 0.2%	0.0031	0	RPS21:RPS10:RPS15:RPS5:RPS28B:RPS18:RPS3	447:45903:1900153:30490:6412:6407:56:469:28
6407	rRNA export from nucleus	7 out of 421 genes, 1.7%	12 out of 6473 background genes, 0.2%	0.0031	0	RPS21:RPS10:RPS15:RPS5:RPS28B:RPS18:RPS3	447:45903:1900153:30490:6412:6407:56:469:28
6360	transcription by RNA polymerase I	11 out of 421 genes, 2.6%	33 out of 6473 background genes, 0.5%	0.0045	0	C1_01860W_A:TBP1:C1_12820C_A:RPC10:C2_02630W_A:RPC40:RPA12:C4_03040W_A:RPO26:CR_01950W_A:RPC19	60261:70893:6361:1193:45899:6351:6366:6353:31440:122:42790:6362:6363:42797:6360:6368:6383:6355:70898:31564:51123:32968:6367:42493
46483	heterocycle metabolic process	121 out of 421 genes, 28.7%	1298 out of 6473 background genes, 20.1%	0.00708	0.0004	CDC13:CDC5:RPS21B:C1_01860W_A:RPS16A:RPS1:C1_05230W_A:C1_05720W_A:RPS14B:C1_06540C_A:RPS23A:C1_07280C_A:SAM4:ERG12:BUD31:TBP1:C1_11160C_A:C1_11280W_A:WRS1:C1_12440W_A:C1_12820C_A:MSH6:C1_14080W_A:C1_14240W_A:RPC10:C2_01510C_A:C2_02630W_A:C2_02710C_A:HPT1:RPS9B:TBF1:RPL17B:C2_04700C_A:RPF2:RPC40:KTI11:C2_05670C_A:SMD2:IMH3:C2_06480W_A:AAH1:RPA12:NOC4:CDC47:C2_09310C_A:PMI1:SMM1:FCY21:UTP8:PMA1:SES…	32:60261:6261:70485:10947:19284:70893:6361:1903490:45944:730:1193:30447:6281:463:55085:43409:7004:6434:9272:1902542:1402:43103:70525:45292:722:6325:71479:42254:72530:9113:45899:34636:7114:100036:2001209:1903459:33315:6334:1902626:44182:45793:6312:727:46827:6177:6273:70481:42276:7127:6351:184:6366:10696:30466:6812:34599:6267:6302:1903469:71042:31936:479:950:10973:2001208:1015:98787:9405:33314:5108…
6725	cellular aromatic compound metabolic process	120 out of 421 genes, 28.5%	1285 out of 6473 background genes, 19.9%	0.00721	0.0004	CDC13:CDC5:RPS21B:C1_01860W_A:RPS16A:RPS1:C1_05230W_A:C1_05720W_A:RPS14B:C1_06540C_A:RPS23A:C1_07280C_A:SAM4:ERG12:BUD31:TBP1:C1_11160C_A:C1_11280W_A:WRS1:C1_12440W_A:C1_12820C_A:MSH6:C1_14080W_A:C1_14240W_A:RPC10:C2_01510C_A:C2_02630W_A:C2_02710C_A:HPT1:RPS9B:TBF1:RPL17B:C2_04700C_A:RPF2:RPC40:KTI11:C2_05670C_A:SMD2:IMH3:C2_06480W_A:AAH1:RPA12:NOC4:CDC47:C2_09310C_A:PMI1:SMM1:FCY21:UTP8:PMA1:SES…	32:60261:6261:10947:19284:70893:6361:1903490:45944:730:1193:30447:6281:463:55085:43409:7004:6434:9272:1902542:1402:43103:70525:45292:722:6325:71479:42254:72530:9113:45899:34636:7114:100036:2001209:1903459:33315:6334:1902626:44182:45793:6312:727:46827:6177:6273:70481:42276:7127:6351:184:6366:10696:30466:6812:34599:6267:6302:1903469:71042:31936:479:950:10973:2001208:1015:98787:9405:33314:51083:2143…
28	ribosomal small subunit assembly	7 out of 421 genes, 1.7%	14 out of 6473 background genes, 0.2%	0.01198	0.0004	RPS14B:RPS17B:C2_02710C_A:UBI3:C5_01540W_A:RPS28B:RPS27	42254:479:1900153:16567:2109:30490:6412:6407:462:56:469:28:6364
97064	ncRNA export from nucleus	9 out of 421 genes, 2.1%	26 out of 6473 background genes, 0.4%	0.02455	0.0004	RPS21:RPS10:UTP8:RPS15:RPS5:RPS28B:RPS18:CEX1:RPS3	447:45903:6409:1900153:30490:6412:6407:45943:462:56:469:28
Molecular function
GOID	GO_term	Cluster frequency	Background frequency	Corrected P-value	False discovery rate	Gene(s) annotated to the term	Directly Annotated GOID List
3735	structural constituent of ribosome	68 out of 421 genes, 16.2%	164 out of 6473 background genes, 2.5%	1.61e-36	0	RPL16A:RPS21B:RPS21:MRP20:C1_01680C_A:RPP1A:RPL13:RPS16A:RPS1:RPL6:C1_03620C_A:C1_04820C_A:C1_05720W_A:RPS14B:RPS22A:C1_06470W_A:RPS23A:C1_06890C_A:C1_08520C_A:RPL42:RPS17B:RPL27A:RPL14:RPL38:C2_01030W_A:C2_02270C_A:RPL21A:RPS9B:RPL39:RPL17B:C2_04700C_A:C2_05410W_A:C2_05710C_A:RPL11:C2_07030C_A:RPL12:RPL9B:RPS15:RPP2B:C3_06240C_A:RPS12:C3_07390C_A:RPS6A:C4_04390W_A:RPL30:UBI3:MRP17:C5_01050C_A:C5…	3906:3735:19843:31386:166:70181:30295:30627:34236:3723
5198	structural molecule activity	71 out of 421 genes, 16.9%	230 out of 6473 background genes, 3.6%	1.84e-28	0	RPL16A:RPS21B:RPS21:MRP20:C1_01680C_A:RPP1A:RPL13:RPS16A:RPS1:RPL6:CDC12:C1_03620C_A:C1_04820C_A:C1_05720W_A:RPS14B:RPS22A:C1_06470W_A:RPS23A:C1_06890C_A:C1_08520C_A:RPL42:RPS17B:RPL27A:RPL14:RPL38:C2_01030W_A:C2_02270C_A:RPL21A:RPS9B:RPL39:RPL17B:C2_04700C_A:C2_05410W_A:C2_05710C_A:RPL11:C2_07030C_A:RPL12:RPL9B:RPS15:RPP2B:C3_06240C_A:RPS12:C3_07390C_A:RPS6A:C4_04390W_A:RPL30:UBI3:MRP17:C5_01050…	3906:3735:19843:5200:166:10314:30295:70181:34236:60090:70273:5525:5198:31386:5545:3924:30627:3723
1056	RNA polymerase III activity	10 out of 421 genes, 2.4%	17 out of 6473 background genes, 0.3%	4.57e-06	0	C1_05230W_A:C1_12820C_A:RPC10:RPC40:C4_03040W_A:RPO26:C6_03210C_A:C7_01210C_A:RPC19:CR_02890C_A	1055:8270:1056:3968:46983:1054:3677:3899
3899	DNA-directed 5'-3' RNA polymerase activity	13 out of 421 genes, 3.1%	34 out of 6473 background genes, 0.5%	2.38e-05	0	C1_05230W_A:C1_12820C_A:RPC10:RPC40:RPA12:C4_03040W_A:PRI2:RPO26:C6_03210C_A:C7_01210C_A:CR_01950W_A:RPC19:CR_02890C_A	61629:3676:1055:8270:1056:3968:46983:3697:3896:1054:3677:3899
34062	5'-3' RNA polymerase activity	13 out of 421 genes, 3.1%	35 out of 6473 background genes, 0.5%	3.56e-05	0	C1_05230W_A:C1_12820C_A:RPC10:RPC40:RPA12:C4_03040W_A:PRI2:RPO26:C6_03210C_A:C7_01210C_A:CR_01950W_A:RPC19:CR_02890C_A	61629:3676:1055:8270:1056:3968:46983:3697:3896:1054:3677:3899
97747	RNA polymerase activity	13 out of 421 genes, 3.1%	35 out of 6473 background genes, 0.5%	3.56e-05	0	C1_05230W_A:C1_12820C_A:RPC10:RPC40:RPA12:C4_03040W_A:PRI2:RPO26:C6_03210C_A:C7_01210C_A:CR_01950W_A:RPC19:CR_02890C_A	61629:3676:1055:8270:1056:3968:46983:3697:3896:1054:3677:3899
1054	RNA polymerase I activity	8 out of 421 genes, 1.9%	13 out of 6473 background genes, 0.2%	8.41e-05	0	C1_12820C_A:RPC10:RPC40:RPA12:C4_03040W_A:RPO26:CR_01950W_A:RPC19	61629:3676:1055:8270:1056:3968:46983:1054:3677:3899
19843	rRNA binding	12 out of 421 genes, 2.9%	40 out of 6473 background genes, 0.6%	0.00149	0	RPS21:RPS14B:C2_01030W_A:C2_02710C_A:RPS9B:RPF2:RPL9B:MRP17:RPS13:POP4:NOP15:IMP4	3735:19843:3676:43047:42134:4526:166:70181:8312:4540:30515:3723:171:8097
140098	catalytic activity, acting on RNA	31 out of 421 genes, 7.4%	225 out of 6473 background genes, 3.5%	0.01401	0	TIF:C1_05230W_A:WRS1:C1_12820C_A:RPC10:RPC40:C2_05670C_A:C2_06480W_A:RPA12:CDC47:C2_09310C_A:SMM1:SES1:SUB2:SEN2:C4_03040W_A:C4_04810C_A:PRI2:RPO26:MES1:POP4:C6_03210C_A:C7_01210C_A:C7_03660C_A:DED81:CR_01950W_A:RPC19:CR_02890C_A:DPS1-1:CR_09740W_A:POP3	17116:16423:50660:1055:8270:166:4816:9378:8186:4828:3724:3697:3727:4825:3896:3677:4386:17111:3743:3899:16887:4518:3824:61629:1904931:4815:52905:33679:3676:42134:4526:1056:3678:1990518:43138:2161:3968:46983:3682:4830:213:4827:5524:1054:3688:4540:17150:50567:4812:3723:171:8176
Cellular component
GOID	GO_term	Cluster frequency	Background frequency	Corrected P-value	False discovery rate	Gene(s) annotated to the term	Directly Annotated GOID List
5840	ribosome	76 out of 421 genes, 18.1%	194 out of 6473 background genes, 3.0%	4.6e-39	0	RPL16A:RPS21B:RPS21:MRP20:C1_01680C_A:RPP1A:RPL13:RPS16A:RPS1:RPL6:C1_03620C_A:C1_04820C_A:C1_05720W_A:RPS14B:RPS22A:C1_06470W_A:RPS23A:C1_06890C_A:C1_08520C_A:RPL42:RPS17B:EGD1:RPL27A:RPL14:RPL38:C2_01030W_A:C2_02270C_A:RPL21A:RPS9B:RPL39:RPL17B:C2_04700C_A:C2_05410W_A:C2_05710C_A:RPL11:C2_07030C_A:RPL12:RPL9B:EGD2:RPS15:RPP2B:RPL18:RPL8B:C3_06240C_A:RPS12:C3_07390C_A:RPS6A:ZUO1:C4_04390W_A:EFB1…	5622:5737:5763:5829:9986:32040:5840:5739:5854:5762:42788:30687:15934:5844:30688:5730:16020:22625:5634:30686:22627:30445:15935:5576:5853:30446:62040
22626	cytosolic ribosome	49 out of 421 genes, 11.6%	86 out of 6473 background genes, 1.3%	4.32e-34	0	RPL16A:RPS21B:RPS21:RPP1A:RPL13:RPS1:RPL6:C1_05720W_A:RPS22A:C1_06470W_A:RPS23A:C1_06890C_A:RPL42:RPL27A:RPL14:RPL38:RPL21A:RPS9B:RPL39:RPL17B:C2_05410W_A:C2_05710C_A:RPL11:RPL12:RPL9B:RPP2B:RPL18:RPL8B:RPS12:RPS6A:C4_04390W_A:RPL24A:RPL30:UBI3:C5_01540W_A:RPS5:RPL43A:RPS13:RPL32:RPL25:RPL23A:RPL10A:RPS28B:ASC1:RPL15A:RPS3:RPS27:RPS20:CR_08480C_A	5622:5737:5829:9986:32040:5840:30687:15934:30688:5730:16020:5634:22625:30445:22627:15935:5576:30446:62040
44391	ribosomal subunit	65 out of 421 genes, 15.4%	164 out of 6473 background genes, 2.5%	2.39e-33	0	RPL16A:RPS21B:RPS21:MRP20:C1_01680C_A:RPP1A:RPL13:RPS1:RPL6:C1_05720W_A:RPS22A:C1_06470W_A:RPS23A:C1_06890C_A:C1_08520C_A:RPL42:RPL27A:RPL14:RPL38:C2_01030W_A:C2_02270C_A:RPL21A:RPS9B:RPL39:RPL17B:C2_04700C_A:C2_05410W_A:C2_05710C_A:RPL11:C2_07030C_A:RPL12:RPL9B:RPS15:RPP2B:RPL18:RPL8B:C3_06240C_A:RPS12:C3_07390C_A:RPS6A:C4_04390W_A:RPL24A:RPL30:UBI3:MRP17:C5_01050C_A:C5_01540W_A:RPS5:C5_03410C_A…	5622:5737:5763:5829:9986:32040:5840:5739:5762:30687:15934:30688:5730:16020:5634:22625:30686:30445:22627:15935:5576:30446:62040
1990904	ribonucleoprotein complex	115 out of 421 genes, 27.3%	592 out of 6473 background genes, 9.1%	4.1e-27	0	RPL16A:TIF:RPS21B:RPS21:MRP20:C1_01680C_A:CYS4:C1_02450C_A:RPP1A:RPL13:RPS16A:RPS1:RPL6:C1_03620C_A:SSA2:C1_04820C_A:C1_05630C_A:C1_05720W_A:RPS14B:RPS22A:C1_06470W_A:RPS23A:C1_06890C_A:DRG1:C1_08520C_A:C1_09560C_A:BUD31:RPL42:RPS17B:C1_11280W_A:EGD1:C1_11780W_A:RPL27A:RPL14:C1_14080W_A:RPL38:C2_01030W_A:C2_02270C_A:C2_02710C_A:RPL21A:RPS9B:RPL39:RPL17B:C2_04700C_A:C2_05410W_A:C2_05710C_A:SMD2:RP…	5763:5655:5684:9986:30692:5732:5762:329:42788:5886:15934:31429:71006:16282:5688:22625:243:30686:71004:22627:5622:5737:5681:5840:932:5854:71007:1990726:71014:30688:9277:32545:784:30532:5853:30677:33553:32040:1990861:5934:30687:5844:46540:5935:172:30445:34455:15935:30446:5686:62040:5829:5739:974:5682:34456:34457:5685:5852:31428:16020:5730:5634:34399:10494:5576:781:16281
44445	cytosolic part	51 out of 421 genes, 12.1%	145 out of 6473 background genes, 2.2%	8.49e-23	0	RPL16A:RPS21B:RPS21:RPP1A:RPL13:RPS1:RPL6:C1_05720W_A:RPS22A:C1_06470W_A:RPS23A:C1_06890C_A:RPL42:RPL27A:RPL14:RPL38:RPL21A:RPS9B:RPL39:RPL17B:C2_05410W_A:C2_05710C_A:RPL11:CCT2:RPL12:RPL9B:RPP2B:RPL18:RPL8B:RPS12:RPS6A:C4_02780W_A:C4_04390W_A:RPL24A:RPL30:UBI3:C5_01540W_A:RPS5:RPL43A:RPS13:RPL32:RPL25:RPL23A:RPL10A:RPS28B:ASC1:RPL15A:RPS3:RPS27:RPS20:CR_08480C_A	9986:15934:22625:22627:5622:5737:5840:30688:32040:30687:5832:30445:15935:30446:62040:5829:5730:16020:5634:5576
22625	cytosolic large ribosomal subunit	31 out of 421 genes, 7.4%	50 out of 6473 background genes, 0.8%	1.53e-22	0	RPL16A:RPP1A:RPL13:RPL6:C1_05720W_A:C1_06470W_A:C1_06890C_A:RPL42:RPL27A:RPL14:RPL38:RPL21A:RPL39:RPL17B:C2_05410W_A:C2_05710C_A:RPL11:RPL12:RPL9B:RPP2B:RPL18:RPL8B:C4_04390W_A:RPL24A:RPL30:RPL43A:RPL32:RPL25:RPL23A:RPL10A:RPL15A	9986:15934:22625:5622:5737:5840:32040:30687:30445:30446:5829:16020:5634:5576
15934	large ribosomal subunit	40 out of 421 genes, 9.5%	100 out of 6473 background genes, 1.5%	6.07e-20	0	RPL16A:MRP20:RPP1A:RPL13:RPL6:C1_05720W_A:C1_06470W_A:C1_06890C_A:C1_08520C_A:RPL42:RPL27A:RPL14:RPL38:C2_01030W_A:RPL21A:RPL39:RPL17B:C2_04700C_A:C2_05410W_A:C2_05710C_A:RPL11:C2_07030C_A:RPL12:RPL9B:RPP2B:RPL18:RPL8B:C3_06240C_A:C4_04390W_A:RPL24A:RPL30:C5_01050C_A:C5_03410C_A:RPL43A:RPL32:RPL25:RPL23A:RPL10A:RPL15A:CR_05150W_A	9986:5762:15934:22625:30686:5622:5737:5840:32040:30687:30445:30446:5829:5730:16020:5634:5576
43228	non-membrane-bounded organelle	149 out of 421 genes, 35.4%	1125 out of 6473 background genes, 17.4%	6.9e-18	0	RPL16A:CDC13:CDC5:TIF:RPS21B:RPS21:MRP20:C1_01680C_A:CYS4:RPP1A:RPL13:RPS16A:RPS1:RPL6:CDC12:C1_03620C_A:C1_04820C_A:C1_05230W_A:C1_05630C_A:C1_05720W_A:RPS14B:RPS22A:C1_06470W_A:C1_06540C_A:RPS23A:C1_06890C_A:DRG1:C1_08520C_A:C1_09560C_A:HCM1:RPL42:TBP1:RPS17B:TOS4:EGD1:C1_11780W_A:RPL27A:C1_12820C_A:RPL14:C1_14080W_A:C1_14240W_A:RPC10:RPL38:SAS2:C2_01030W_A:C2_02270C_A:C2_02630W_A:C2_02710C_A:R…	5666:5628:5724:5763:5655:5669:9986:30692:5881:5816:5826:5621:70860:31261:1990023:5688:22625:22627:31560:31298:5940:5840:42764:36391:932:5635:1990726:30688:33255:31982:5667:1400:5853:72687:812:346:31011:1990861:42555:30687:811:228:31105:172:5935:776:34455:30445:15935:62040:131:16586:5938:34456:71341:5656:126:32152:31428:5819:16020:5634:176:10494:5576:16281:32160:5654:110085:5658:120155:5732:5762:4…
43232	intracellular non-membrane-bounded organelle	149 out of 421 genes, 35.4%	1125 out of 6473 background genes, 17.4%	6.9e-18	0	RPL16A:CDC13:CDC5:TIF:RPS21B:RPS21:MRP20:C1_01680C_A:CYS4:RPP1A:RPL13:RPS16A:RPS1:RPL6:CDC12:C1_03620C_A:C1_04820C_A:C1_05230W_A:C1_05630C_A:C1_05720W_A:RPS14B:RPS22A:C1_06470W_A:C1_06540C_A:RPS23A:C1_06890C_A:DRG1:C1_08520C_A:C1_09560C_A:HCM1:RPL42:TBP1:RPS17B:TOS4:EGD1:C1_11780W_A:RPL27A:C1_12820C_A:RPL14:C1_14080W_A:C1_14240W_A:RPC10:RPL38:SAS2:C2_01030W_A:C2_02270C_A:C2_02630W_A:C2_02710C_A:R…	5666:5628:5724:5763:5655:5669:9986:30692:5881:5816:5826:5621:70860:31261:1990023:5688:22625:22627:31560:31298:5940:5840:42764:36391:932:5635:1990726:30688:33255:31982:5667:1400:5853:72687:812:346:31011:1990861:42555:30687:811:228:31105:172:5935:776:34455:30445:15935:62040:131:16586:5938:34456:71341:5656:126:32152:31428:5819:16020:5634:176:10494:5576:16281:32160:110085:5654:5658:120155:5732:5762:4…
22627	cytosolic small ribosomal subunit	18 out of 421 genes, 4.3%	30 out of 6473 background genes, 0.5%	3.63e-12	0	RPS21B:RPS21:RPS1:RPS22A:RPS23A:RPS9B:RPS12:RPS6A:UBI3:C5_01540W_A:RPS5:RPS13:RPS28B:ASC1:RPS3:RPS27:RPS20:CR_08480C_A	9986:22627:5840:30688:30445:15935:62040:16020:5634:5576:5737:5622:32040:30446:5730
32991	protein-containing complex	191 out of 421 genes, 45.4%	1855 out of 6473 background genes, 28.7%	9.99e-12	0	RPL16A:TIF:RPS21B:RPS21:MRP20:C1_01680C_A:CYS4:C1_02450C_A:RPP1A:RPL13:RPS16A:RPS1:RPL6:CDC12:C1_03620C_A:ELA1:SSA2:APE2:C1_04820C_A:C1_05230W_A:C1_05630C_A:C1_05720W_A:RPS14B:RPS22A:C1_06470W_A:C1_06540C_A:RPS23A:C1_06890C_A:C1_07280C_A:DRG1:C1_08520C_A:PCL2:C1_09350W_A:C1_09560C_A:BUD31:RPL42:LKH1:TBP1:RPS17B:C1_10960W_A:C1_11110C_A:C1_11280W_A:EGD1:C1_11780W_A:RPL27A:C1_12820C_A:RPL14:MSH6:C1_…	5666:5628:5724:5763:5655:5669:5684:9986:30692:5671:329:5826:5621:70860:31261:71006:5688:5851:22625:243:22627:31560:31463:42272:31298:5940:5681:5840:42764:36391:932:70449:5635:5675:1990726:71014:30688:33255:31982:5667:1400:5853:72687:17102:33573:812:5789:346:31415:31011:1990861:814:42555:30687:811:32301:31105:112:172:5935:776:5832:34455:30445:178:15935:5686:62040:124:131:307:5794:974:16586:5682:59…
15935	small ribosomal subunit	25 out of 421 genes, 5.9%	64 out of 6473 background genes, 1.0%	1.14e-11	0	RPS21B:RPS21:C1_01680C_A:RPS1:RPS22A:RPS23A:C2_02270C_A:RPS9B:RPS15:RPS12:C3_07390C_A:RPS6A:UBI3:MRP17:C5_01540W_A:RPS5:RPS13:RPS28B:C7_01020C_A:ASC1:CR_04140W_A:RPS3:RPS27:RPS20:CR_08480C_A	5763:9986:22627:5840:30688:30445:15935:62040:16020:5634:5576:5737:5622:32040:30446:5739:5730
5829	cytosol	69 out of 421 genes, 16.4%	429 out of 6473 background genes, 6.6%	1.29e-10	0	RPL16A:TIF:RPS21B:RPS21:CYS4:RPP1A:RPL13:RPS1:RPL6:SSA2:PIL1:C1_05720W_A:RPS22A:C1_06470W_A:RPS23A:C1_06890C_A:C1_07280C_A:RPL42:RPL27A:RPL14:RPL38:RPL21A:RPS9B:RPL39:RPL17B:RHO3:C2_05410W_A:C2_05710C_A:RPL11:NOC4:CCT2:GPD1:RPL12:RPL9B:RAD53:RPP2B:RPL18:RPL8B:RPS12:RPS6A:C4_02780W_A:C4_04390W_A:EFB1:RPL24A:RPL30:C4_06170C_A:UBI3:C5_01540W_A:C5_02440C_A:RPS5:RPL43A:GRF10:RPS13:C6_00760W_A:RPL32:RP…	5655:9986:30692:329:32153:22625:22627:5840:5675:30688:5853:30687:172:5832:30445:15935:62040:32126:16020:5634:10494:5576:16281:5886:15934:5737:5622:5777:9277:5933:32040:5844:35861:30446:9331:5829:5739:5730:408:439
5666	RNA polymerase III complex	10 out of 421 genes, 2.4%	17 out of 6473 background genes, 0.3%	4.46e-06	0	C1_05230W_A:C1_12820C_A:RPC10:RPC40:C4_03040W_A:RPO26:C6_03210C_A:C7_01210C_A:RPC19:CR_02890C_A	5666:5634:790:30880:5736:5665:5739
44464	cell part	296 out of 421 genes, 70.3%	3782 out of 6473 background genes, 58.4%	3.64e-05	0	RPL16A:CDC13:ENA2:CNS1:ERG2:NRM1:CDC5:TIF:RPS21B:RPS21:MRP20:C1_01680C_A:C1_01860W_A:CYS4:C1_02450C_A:RPP1A:RPL13:RPS16A:RPS1:RPL6:CDC12:C1_03620C_A:ELA1:SSA2:APE2:PIL1:SYG1:ERG3:C1_04820C_A:C1_04840C_A:YBN5:C1_05230W_A:C1_05630C_A:C1_05720W_A:PGA26:RPS14B:RPS22A:C1_06470W_A:C1_06540C_A:RPS23A:C1_06890C_A:GAP4:C1_07280C_A:DRG1:C1_08520C_A:PCL2:TPO3:PGA6:C1_09350W_A:ERG12:C1_09560C_A:HCM1:BUD31:NT…	5666:5628:5724:5763:5655:5669:5684:9986:30692:31966:30133:5671:30427:5881:329:5816:5826:5759:5621:70860:31261:71006:1990023:5688:5851:32153:5887:22625:243:22627:31560:31463:42272:31298:5940:5681:5840:42764:36391:932:70449:5635:5675:1990726:71014:30688:31227:33255:31982:5667:1400:31520:5853:72687:17102:30176:33573:812:139:5789:346:31415:31011:1990861:814:42555:30687:811:228:32301:31105:112:172:593…
5623	cell	296 out of 421 genes, 70.3%	3782 out of 6473 background genes, 58.4%	3.64e-05	0	RPL16A:CDC13:ENA2:CNS1:ERG2:NRM1:CDC5:TIF:RPS21B:RPS21:MRP20:C1_01680C_A:C1_01860W_A:CYS4:C1_02450C_A:RPP1A:RPL13:RPS16A:RPS1:RPL6:CDC12:C1_03620C_A:ELA1:SSA2:APE2:PIL1:SYG1:ERG3:C1_04820C_A:C1_04840C_A:YBN5:C1_05230W_A:C1_05630C_A:C1_05720W_A:PGA26:RPS14B:RPS22A:C1_06470W_A:C1_06540C_A:RPS23A:C1_06890C_A:GAP4:C1_07280C_A:DRG1:C1_08520C_A:PCL2:TPO3:PGA6:C1_09350W_A:ERG12:C1_09560C_A:HCM1:BUD31:NT…	5666:5628:5724:5763:5655:5669:5684:9986:30692:31966:30133:5671:30427:5881:329:5816:5826:5759:5621:70860:31261:71006:1990023:5688:5851:32153:5887:22625:243:22627:31560:31463:42272:31298:5940:5681:5840:42764:36391:932:70449:5635:5675:1990726:71014:30688:31227:33255:31982:5667:1400:31520:5853:72687:17102:30176:33573:812:139:5789:346:31415:31011:1990861:814:42555:30687:811:228:32301:31105:112:172:593…
5736	RNA polymerase I complex	8 out of 421 genes, 1.9%	13 out of 6473 background genes, 0.2%	8.21e-05	0	C1_12820C_A:RPC10:RPC40:RPA12:C4_03040W_A:RPO26:CR_01950W_A:RPC19	5666:5634:30880:5736:5665
44424	intracellular part	262 out of 421 genes, 62.2%	3370 out of 6473 background genes, 52.1%	0.0025	0	RPL16A:CDC13:ENA2:CNS1:ERG2:NRM1:CDC5:TIF:RPS21B:RPS21:MRP20:C1_01680C_A:C1_01860W_A:CYS4:C1_02450C_A:RPP1A:RPL13:RPS16A:RPS1:RPL6:CDC12:C1_03620C_A:ELA1:SSA2:APE2:PIL1:ERG3:C1_04820C_A:C1_04840C_A:YBN5:C1_05230W_A:C1_05630C_A:C1_05720W_A:RPS14B:RPS22A:C1_06470W_A:C1_06540C_A:RPS23A:C1_06890C_A:C1_07280C_A:DRG1:C1_08520C_A:PCL2:TPO3:C1_09350W_A:ERG12:C1_09560C_A:HCM1:BUD31:NTF2:RPL42:LKH1:TBP1:C1…	5666:5628:5724:5763:5655:5669:5684:9986:30692:31966:30133:5671:30427:5881:329:5816:5826:5759:5621:70860:31261:71006:1990023:5688:5851:32153:5887:22625:243:22627:31560:31463:42272:31298:5940:5681:5840:42764:36391:932:70449:5635:5675:1990726:71014:30688:31227:33255:31982:5667:1400:5853:72687:17102:30176:812:139:5789:346:31415:31011:1990861:814:42555:30687:811:228:32301:31105:112:172:5935:776:5832:3…
5622	intracellular	264 out of 421 genes, 62.7%	3407 out of 6473 background genes, 52.6%	0.00294	0	RPL16A:CDC13:ENA2:CNS1:ERG2:NRM1:CDC5:TIF:RPS21B:RPS21:MRP20:C1_01680C_A:C1_01860W_A:CYS4:C1_02450C_A:RPP1A:RPL13:RPS16A:RPS1:RPL6:CDC12:C1_03620C_A:ELA1:SSA2:APE2:PIL1:ERG3:C1_04820C_A:C1_04840C_A:YBN5:C1_05230W_A:C1_05630C_A:C1_05720W_A:RPS14B:RPS22A:C1_06470W_A:C1_06540C_A:RPS23A:C1_06890C_A:C1_07280C_A:DRG1:C1_08520C_A:PCL2:TPO3:C1_09350W_A:ERG12:C1_09560C_A:HCM1:BUD31:NTF2:RPL42:LKH1:TBP1:C1…	5666:5628:5724:5763:5655:5669:5684:9986:30692:31966:30133:5671:30427:5881:329:5816:5826:5759:5621:70860:31261:71006:1990023:5688:5851:32153:5887:22625:243:22627:31560:31463:42272:31298:5940:5681:5840:42764:36391:932:70449:5635:5675:1990726:71014:30688:31227:33255:31982:5667:1400:5853:72687:17102:30176:812:139:5789:346:31415:31011:1990861:814:42555:30687:811:228:32301:31105:112:172:5935:776:5832:3…
55029	nuclear DNA-directed RNA polymerase complex	16 out of 421 genes, 3.8%	73 out of 6473 background genes, 1.1%	0.00369	0	C1_05230W_A:C1_07280C_A:TBP1:C1_12820C_A:RPC10:RPC40:RPA12:C4_03040W_A:PRI2:RPO26:C6_00640C_A:C6_03210C_A:C7_01210C_A:CR_01950W_A:RPC19:CR_02890C_A	5666:5669:5635:5675:5667:112:126:5634:5658:790:30880:5736:5665:120:5829:5739:439
30880	RNA polymerase complex	16 out of 421 genes, 3.8%	75 out of 6473 background genes, 1.2%	0.0053	0	C1_05230W_A:C1_07280C_A:TBP1:C1_12820C_A:RPC10:RPC40:RPA12:C4_03040W_A:PRI2:RPO26:C6_00640C_A:C6_03210C_A:C7_01210C_A:CR_01950W_A:RPC19:CR_02890C_A	5666:5669:5635:5675:5667:112:126:5634:5658:790:30880:5736:5665:120:5829:5739:439
428	DNA-directed RNA polymerase complex	16 out of 421 genes, 3.8%	75 out of 6473 background genes, 1.2%	0.0053	0	C1_05230W_A:C1_07280C_A:TBP1:C1_12820C_A:RPC10:RPC40:RPA12:C4_03040W_A:PRI2:RPO26:C6_00640C_A:C6_03210C_A:C7_01210C_A:CR_01950W_A:RPC19:CR_02890C_A	5666:5669:5635:5675:5667:112:126:5634:5658:790:30880:5736:5665:120:5829:5739:439
44452	nucleolar part	21 out of 421 genes, 5.0%	122 out of 6473 background genes, 1.9%	0.00915	0	C1_09560C_A:TBP1:C1_11780W_A:C1_12820C_A:C1_14080W_A:RPC10:C2_02630W_A:C2_02710C_A:RPC40:RPA12:UTP8:C3_04380C_A:C4_03040W_A:C5_02850W_A:RPO26:POP4:CR_01950W_A:RPC19:NHP2:IMP4:POP3	5666:5655:5669:70860:30688:5667:172:34455:34456:126:31428:5634:31429:30686:30880:5736:32545:5665:30677:33553:32040:120:46540:5829:34457:5730
30684	preribosome	22 out of 421 genes, 5.2%	132 out of 6473 background genes, 2.0%	0.00999	0	RPL16A:RPS21:C1_02450C_A:RPS14B:RPL27A:C1_14080W_A:C2_02710C_A:RPS9B:RPL17B:C2_04700C_A:NOC4:UTP8:C3_04380C_A:RLP24:RPS6A:RPL25:NIP7:NOP15:RPS3:CR_07030C_A:CR_07080W_A:IMP4	9986:30692:22625:22627:5840:30688:30687:34455:30445:15935:62040:34456:31428:16020:5634:5576:15934:30686:5622:5737:32545:33553:32040:46540:30446:5829:34457:5730
5730	nucleolus	35 out of 421 genes, 8.3%	271 out of 6473 background genes, 4.2%	0.01765	0	C1_06540C_A:C1_09560C_A:TBP1:C1_11780W_A:C1_12820C_A:C1_14080W_A:RPC10:C2_02630W_A:C2_02710C_A:C2_04700C_A:RPF2:RPC40:RPA12:NOC4:UTP8:C3_04380C_A:RLP24:ZUO1:C4_03040W_A:C5_02850W_A:RPO26:POP4:NOP15:RPS28B:LSM6:CR_01710W_A:CR_01950W_A:RPC19:NHP2:CR_07030C_A:CR_07080W_A:SMX4:IMP4:POP3:CSM1	5666:5655:5669:30692:70860:5688:22627:5840:932:5635:1990726:30688:5667:30687:172:34455:34456:126:31428:5634:176:5654:5732:15934:31429:30686:5737:30880:5736:32545:5665:30677:33553:32040:33551:5844:120:46540:177:5829:34457:5730:781
44446	intracellular organelle part	178 out of 421 genes, 42.3%	2176 out of 6473 background genes, 33.6%	0.02222	0	RPL16A:CDC13:CDC5:RPS21B:RPS21:MRP20:C1_01680C_A:RPP1A:RPL13:RPS1:RPL6:CDC12:ELA1:SSA2:APE2:ERG3:C1_05230W_A:C1_05630C_A:C1_05720W_A:RPS22A:C1_06470W_A:C1_06540C_A:RPS23A:C1_06890C_A:C1_07280C_A:C1_08520C_A:TPO3:C1_09560C_A:HCM1:BUD31:NTF2:RPL42:LKH1:TBP1:C1_10960W_A:C1_11280W_A:TOS4:C1_11780W_A:RPL27A:C1_12820C_A:RPL14:MSH6:C1_13840W_A:C1_14080W_A:C1_14240W_A:RPC10:RPL38:SAS2:C2_01030W_A:KAR2:C2…	5666:5628:5724:5763:5655:5669:5684:9986:30692:31966:30133:5671:30427:5881:329:5816:5826:5759:5621:70860:31261:71006:1990023:5688:5887:22625:243:22627:31560:31463:42272:31298:5940:5681:5840:42764:36391:932:70449:5635:5675:1990726:71014:30688:31227:33255:31982:5667:1400:72687:30176:812:139:5789:346:31011:814:42555:30687:811:228:32301:31105:112:172:5935:776:30445:34455:178:15935:5686:62040:124:131:5…
44422	organelle part	178 out of 421 genes, 42.3%	2191 out of 6473 background genes, 33.8%	0.03386	0	RPL16A:CDC13:CDC5:RPS21B:RPS21:MRP20:C1_01680C_A:RPP1A:RPL13:RPS1:RPL6:CDC12:ELA1:SSA2:APE2:ERG3:C1_05230W_A:C1_05630C_A:C1_05720W_A:RPS22A:C1_06470W_A:C1_06540C_A:RPS23A:C1_06890C_A:C1_07280C_A:C1_08520C_A:TPO3:C1_09560C_A:HCM1:BUD31:NTF2:RPL42:LKH1:TBP1:C1_10960W_A:C1_11280W_A:TOS4:C1_11780W_A:RPL27A:C1_12820C_A:RPL14:MSH6:C1_13840W_A:C1_14080W_A:C1_14240W_A:RPC10:RPL38:SAS2:C2_01030W_A:KAR2:C2…	5666:5628:5724:5763:5655:5669:5684:9986:30692:31966:30133:5671:30427:5881:329:5816:5826:5759:5621:70860:31261:71006:1990023:5688:5887:22625:243:22627:31560:31463:42272:31298:5940:5681:5840:42764:36391:932:70449:5635:5675:1990726:71014:30688:31227:33255:31982:5667:1400:72687:30176:812:139:5789:346:31011:814:42555:30687:811:228:32301:31105:112:172:5935:776:30445:34455:178:15935:5686:62040:124:131:5…
5737	cytoplasm	186 out of 421 genes, 44.2%	2310 out of 6473 background genes, 35.7%	0.03529	0	RPL16A:ENA2:CNS1:ERG2:NRM1:TIF:RPS21B:RPS21:MRP20:C1_01680C_A:CYS4:C1_02450C_A:RPP1A:RPL13:RPS16A:RPS1:RPL6:CDC12:C1_03620C_A:SSA2:APE2:PIL1:ERG3:C1_04820C_A:C1_04840C_A:YBN5:C1_05630C_A:C1_05720W_A:RPS14B:RPS22A:C1_06470W_A:C1_06540C_A:RPS23A:C1_06890C_A:C1_07280C_A:DRG1:C1_08520C_A:TPO3:ERG12:HCM1:RPL42:LKH1:C1_10690W_A:RPS17B:C1_10960W_A:C1_11110C_A:C1_11160C_A:FGR39:EGD1:WRS1:RPL27A:RPL14:C1_…	5666:5628:5763:5655:9986:30692:31966:30133:30427:5881:329:5816:5826:5759:5621:31261:5688:5851:32153:5887:22625:22627:31560:31298:5940:5840:42764:36391:932:5675:1990726:30688:31227:31982:1400:5853:72687:17102:30176:139:5789:31415:1990861:814:42555:30687:31105:172:5935:5832:30445:178:15935:62040:5768:131:5794:5782:5938:71341:5656:61957:32126:30287:32152:16020:5634:176:10494:5576:5741:16281:97583:33…
43229	intracellular organelle	229 out of 421 genes, 54.4%	2961 out of 6473 background genes, 45.7%	0.04079	0	RPL16A:CDC13:ENA2:ERG2:NRM1:CDC5:TIF:RPS21B:RPS21:MRP20:C1_01680C_A:C1_01860W_A:CYS4:C1_02450C_A:RPP1A:RPL13:RPS16A:RPS1:RPL6:CDC12:C1_03620C_A:ELA1:SSA2:APE2:ERG3:C1_04820C_A:C1_04840C_A:C1_05230W_A:C1_05630C_A:C1_05720W_A:RPS14B:RPS22A:C1_06470W_A:C1_06540C_A:RPS23A:C1_06890C_A:C1_07280C_A:DRG1:C1_08520C_A:PCL2:TPO3:C1_09560C_A:HCM1:BUD31:NTF2:RPL42:LKH1:TBP1:C1_10690W_A:RPS17B:C1_10960W_A:FGR3…	5666:5628:5724:5763:5655:5669:5684:9986:30692:31966:30133:5671:30427:5881:329:5816:5826:5759:5621:70860:31261:71006:1990023:5688:5887:22625:243:22627:31560:31463:42272:31298:5940:5681:5840:42764:36391:932:70449:5635:5675:1990726:71014:30688:31227:33255:31982:5667:1400:5853:72687:30176:812:139:5789:346:31011:1990861:814:42555:30687:811:228:32301:31105:112:172:5935:776:34455:30445:178:15935:5686:62…

## Sheet: Part 3
Supplementary Table 2 Results of the gene set enrichment analysis
Part 3– cappz1 strain BM+MSB treated vs. QMY23 strain BM+MSB treated
Upregulated gene set
Biological process
GOID	GO_term	Cluster frequency	Background frequency	Corrected P-value	False discovery rate	Gene(s) annotated to the term	Directly Annotated GOID List
44282	small molecule catabolic process	51 out of 1090 genes, 4.7%	113 out of 6473 background genes, 1.7%	2.6e-09	0	UGA2:GAL1:GOR1:ICL1:ANT1:CAT8:GCV2:MLS1:C1_10240C_A:ARO8:THI20:C2_04340C_A:C2_05980C_A:ZCF10:C2_07430C_A:MDH1-3:FOX2:PXP2:POX1-3:GLX3:AIP2:PNP1:ALT1:C3_06280W_A:DLD2:C3_07490W_A:PEX5:CAR2:SPS20:CAT2:AMS1:ARG83:XKS1:ARO9:SOU1:C5_00800C_A:C5_02220C_A:GRE3:SFC1:ARD:C6_00210W_A:POX1:C6_03620C_A:PAD1:POT1:LAP3:MIS11:LPD1:HGT14:ECI1:UGA3	15961:9313:9116:1901907:9437:1900445:19619:19740:6574:42760:1900443:45944:30447:6084:9072:55085:5998:6567:45454:15741:46177:6520:19439:9113:61688:9074:34356:15867:8152:6546:19441:15976:34354:1300:6090:6564:19358:35948:44182:46855:70785:1080:19309:71470:1904659:9450:6355:19631:6351:42758:61414:42843:6735:34599:8643:1901911:35959:44011:1901906:1901909:19477:42850:7031:9228:6798:70783:46835:46456:36…
16054	organic acid catabolic process	39 out of 1090 genes, 3.6%	76 out of 6473 background genes, 1.2%	8.36e-09	0	UGA2:GOR1:ICL1:ANT1:CAT8:GCV2:MLS1:C1_10240C_A:ARO8:C2_04340C_A:C2_05980C_A:ZCF10:MDH1-3:FOX2:PXP2:POX1-3:AIP2:ALT1:C3_06280W_A:DLD2:PEX5:CAR2:SPS20:CAT2:ARG83:ARO9:C5_00800C_A:SFC1:C6_00210W_A:POX1:C6_03620C_A:PAD1:POT1:LAP3:MIS11:LPD1:HGT14:ECI1:UGA3	9437:1900445:19619:19740:6574:42760:1900443:45944:30447:6084:9072:55085:6567:45454:15741:46177:6520:19439:9113:61688:9074:15867:8152:6546:19441:15976:34354:1300:6090:6564:35948:44182:70785:1080:1904659:9450:6355:19631:6351:42758:61414:6735:8643:35959:44011:19477:7031:70783:46456:36171:6730:6508:6625:9405:5975:6635:10121:9073:15744:6099:6631:9257:19878:19674:6591:71216:46656:55114:6744:16558:19034…
46395	carboxylic acid catabolic process	39 out of 1090 genes, 3.6%	76 out of 6473 background genes, 1.2%	8.36e-09	0	UGA2:GOR1:ICL1:ANT1:CAT8:GCV2:MLS1:C1_10240C_A:ARO8:C2_04340C_A:C2_05980C_A:ZCF10:MDH1-3:FOX2:PXP2:POX1-3:AIP2:ALT1:C3_06280W_A:DLD2:PEX5:CAR2:SPS20:CAT2:ARG83:ARO9:C5_00800C_A:SFC1:C6_00210W_A:POX1:C6_03620C_A:PAD1:POT1:LAP3:MIS11:LPD1:HGT14:ECI1:UGA3	9437:1900445:19619:19740:6574:42760:1900443:45944:30447:6084:9072:55085:6567:45454:15741:46177:6520:19439:9113:61688:9074:15867:8152:6546:19441:15976:34354:1300:6090:6564:35948:44182:70785:1080:1904659:9450:6355:19631:6351:42758:61414:6735:8643:35959:44011:19477:7031:70783:46456:36171:6730:6508:6625:9405:5975:6635:10121:9073:15744:6099:6631:9257:19878:19674:6591:71216:46656:55114:6744:16558:19034…
16042	lipid catabolic process	29 out of 1090 genes, 2.7%	47 out of 6473 background genes, 0.7%	1.09e-08	0	ICL1:ANT1:PLB5:LIP1:MLS1:LIP3:C2_05980C_A:MDH1-3:C3_00400C_A:FOX2:PXP2:POX1-3:PEX5:SPS20:C4_00950C_A:CAT2:YDC1:SFC1:C5_05360C_A:ATG15:PLB1:POX1:LIP4:LIP5:LIP8:POT1:CR_08300C_A:ECI1:LIP7	9437:42760:71071:30447:6084:55085:15741:46461:6642:7114:15867:8152:15976:34638:6914:42758:6735:9267:6644:44011:7031:46456:6624:36170:46514:6625:9405:16236:6660:5975:6635:30397:1904462:15744:6099:6631:6672:9395:44001:71216:55114:16042:6629:16558:9062:45733:34496:44255:19433:30437:44117:34727:45333:16560:36180:6097:19395:42318:6108:46513
72329	monocarboxylic acid catabolic process	27 out of 1090 genes, 2.5%	42 out of 6473 background genes, 0.6%	1.46e-08	0	UGA2:GOR1:ICL1:ANT1:CAT8:MLS1:C1_10240C_A:C2_04340C_A:C2_05980C_A:ZCF10:MDH1-3:FOX2:PXP2:POX1-3:AIP2:DLD2:PEX5:SPS20:CAT2:SFC1:POX1:C6_03620C_A:PAD1:POT1:HGT14:ECI1:UGA3	9437:1900445:19619:19740:42760:1900443:45944:30447:6084:55085:15741:46177:19439:61688:15867:8152:15976:35948:70785:1080:1904659:9450:6355:19631:6351:42758:61414:6735:8643:35959:44011:7031:70783:46456:6625:9405:5975:6635:15744:6099:6631:55114:6744:16558:1903457:9062:45733:30437:44117:45333:16560:36180:51188:9436:6097:19395:46281:33494:42318:6108
55114	oxidation-reduction process	120 out of 1090 genes, 11.0%	405 out of 6473 background genes, 6.3%	5.6e-08	0	C1_00410C_A:C1_00630W_A:C1_01360C_A:SOD2:UGA2:LYS2:GOR1:COQ6:DAO1:SDH1:GLT1:ANT1:CCS1:OLE1:GCV2:AOX2:AOX1:C1_09440W_A:URA1:C1_10280C_A:C1_11290W_A:MRF1:C1_11890W_A:RIB3:OSM2:SOD6:SOD4:C2_01540W_A:SMP2:EBP7:ALD5:DLD1:AMO1:C2_04480W_A:C2_05130W_A:OSM1:C2_05980C_A:ECM17:C2_07070W_A:IFM3:C2_08100W_A:C2_08850C_A:MET10:IFR1:ACS1:MDH1-3:ETR1:DOT5:FOX2:PXP2:POX1-3:MET13:AIP2:C3_03570C_A:HGT4:C3_07330W_A:…	6096:43936:6006:10255:1410:36178:1320:9437:6636:6081:6574:42760:33215:6784:9231:30447:6084:6002:19432:45454:6102:6116:6222:6486:8615:6520:32180:1324:9113:34605:6553:15867:6546:8152:6807:45329:6555:9085:6740:6121:6673:15976:46210:71285:6725:7029:46686:19615:36244:6090:6564:42744:7094:19660:44182:5977:34975:6071:19676:71470:71451:1904659:48252:9450:15671:42758:42843:43603:6735:51594:34599:8643:9267…
9062	fatty acid catabolic process	15 out of 1090 genes, 1.4%	18 out of 6473 background genes, 0.3%	2.27e-06	0	ICL1:ANT1:MLS1:C2_05980C_A:MDH1-3:FOX2:PXP2:POX1-3:PEX5:SPS20:CAT2:SFC1:POX1:POT1:ECI1	9437:42760:30447:6084:55085:15741:15867:8152:15976:42758:6735:44011:7031:46456:6625:9405:5975:6635:15744:6099:6631:55114:16558:9062:45733:30437:45333:16560:6097:19395:42318:6108
32787	monocarboxylic acid metabolic process	54 out of 1090 genes, 5.0%	144 out of 6473 background genes, 2.2%	3.06e-06	0	RIM8:UGA2:GOR1:ICL1:ANT1:CAT8:OLE1:MLS1:C1_10240C_A:CYB2:C1_13880C_A:BNA31:ALD5:C2_04340C_A:PEX6:C2_05980C_A:ZCF10:ACS1:MDH1-3:ETR1:FOX2:PXP2:POX1-3:GLX3:FAA21:AIP2:FAS2:DLD2:PEX5:SPS20:CAT2:C4_02040W_A:SCS7:ACH1:SFC1:DES1:FAT1:PEX7:POX1:C6_03620C_A:PAD1:POT1:ACC1:HNM3:HXK2:MCT1:CR_06070W_A:ALK8:GLK1:LPD1:HGT14:ECI1:PEX13:UGA3	6096:1900535:43936:6006:1410:36178:9437:1900445:19619:6636:19740:6574:42760:1900443:45944:30447:30497:9102:6084:6002:19679:55085:45454:15741:46177:51180:6520:6089:19439:71467:61688:15867:6546:8152:6673:15976:34354:36244:6090:6564:1676:19660:35948:44182:70785:1080:44409:1904659:48252:9450:16562:19631:6355:6351:42758:61414:6735:34599:8643:9267:46208:35959:44539:44011:16573:42761:32445:6606:7031:361…
44242	cellular lipid catabolic process	22 out of 1090 genes, 2.0%	36 out of 6473 background genes, 0.6%	5.51e-06	0	ICL1:ANT1:PLB5:MLS1:C2_05980C_A:MDH1-3:C3_00400C_A:FOX2:PXP2:POX1-3:PEX5:SPS20:C4_00950C_A:CAT2:YDC1:SFC1:ATG15:PLB1:POX1:POT1:CR_08300C_A:ECI1	9437:42760:71071:30447:6084:55085:15741:46461:6642:7114:15867:8152:15976:34638:6914:42758:6735:6644:44011:7031:46456:6624:46514:6625:9405:16236:6660:5975:6635:30397:15744:6099:6631:6672:9395:44001:55114:6629:16558:9062:45733:34496:44255:19433:30437:34727:45333:16560:6097:19395:42318:6108:46513
6635	fatty acid beta-oxidation	11 out of 1090 genes, 1.0%	11 out of 6473 background genes, 0.2%	5.99e-06	0	ANT1:C2_05980C_A:MDH1-3:FOX2:PXP2:POX1-3:PEX5:CAT2:POX1:POT1:ECI1	9437:42760:30447:6084:15867:8152:15976:42758:6735:44011:7031:46456:6625:9405:5975:6635:6099:6631:55114:16558:9062:45733:45333:16560:6097:19395:42318:6108
9056	catabolic process	162 out of 1090 genes, 14.9%	637 out of 6473 background genes, 9.8%	8.39e-06	0	C1_00410C_A:CIS2:SNF7:UGA2:C1_01890C_A:C1_02040C_A:GAL1:RAD16:C1_02910C_A:GOR1:C1_03330C_A:ICL1:C1_04560W_A:CUE5:RPT1:AUT7:PRC3:C1_06390W_A:ANT1:ATC1:C1_08180C_A:CAT8:PLB5:GCV2:LIP1:DOA1:MLS1:LIP3:VPS41:C1_10240C_A:GCA1:CDC48:RPN2:SEC2:DOA4:C1_14170W_A:DDI1:C1_14470W_A:C2_00230W_A:ARO8:C2_00700W_A:C2_01540W_A:PR26:AMO1:THI20:C2_04340C_A:MKK2:C2_05980C_A:SPO72:PRB1:TPK2:ZCF10:APR1:C2_07430C_A:C2_0…	60261:16237:43162:9313:31137:6006:32889:1901907:43171:45324:6574:1900443:45944:6043:71071:6497:31939:30447:6002:9072:48315:55085:6501:5998:6567:1900039:71361:6333:75306:6642:46177:11:71712:1904184:16577:7039:45461:9113:30474:15031:45899:742:5982:7114:15867:43455:16320:6546:6807:1900760:30968:34497:6046:19441:46210:32147:71285:45732:43248:6090:16052:6564:19358:1900239:34638:19660:35948:71211:44182…
15749	monosaccharide transmembrane transport	19 out of 1090 genes, 1.7%	29 out of 6473 background genes, 0.4%	1.28e-05	0	HGT1:HGT2:GAL1:HGT8:HGT6:HGT20:ITR1:C2_09280C_A:HGT19:HGT4:HGT5:STD1:HGT17:NAG6:HGT18:HXT5:HXK2:GLK1:HGT14	15798:6006:30447:6002:16320:7029:19660:44182:8643:46835:1678:9405:15756:6012:1904679:36168:6000:33499:8645:15757:46015:411:6096:10255:36178:34605:36244:61024:45916:1904659:19631:51594:32445:5975:51156:6013:46323:1900429:15761:45835:19388:1302:9749:7165:15755:35690
8645	hexose transmembrane transport	19 out of 1090 genes, 1.7%	29 out of 6473 background genes, 0.4%	1.28e-05	0	HGT1:HGT2:GAL1:HGT8:HGT6:HGT20:ITR1:C2_09280C_A:HGT19:HGT4:HGT5:STD1:HGT17:NAG6:HGT18:HXT5:HXK2:GLK1:HGT14	15798:6006:30447:6002:16320:7029:19660:44182:8643:46835:1678:9405:15756:6012:1904679:36168:6000:33499:8645:15757:46015:411:6096:10255:36178:34605:36244:61024:45916:1904659:19631:51594:32445:5975:51156:6013:46323:1900429:15761:45835:19388:1302:9749:7165:15755:35690
1901575	organic substance catabolic process	141 out of 1090 genes, 12.9%	541 out of 6473 background genes, 8.4%	1.85e-05	0	C1_00410C_A:CIS2:SNF7:UGA2:C1_01890C_A:C1_02040C_A:GAL1:RAD16:GOR1:ICL1:C1_04560W_A:CUE5:RPT1:C1_06390W_A:ANT1:ATC1:CAT8:PLB5:GCV2:LIP1:DOA1:MLS1:LIP3:C1_10240C_A:GCA1:CDC48:RPN2:DOA4:C1_14170W_A:DDI1:C1_14470W_A:C2_00230W_A:ARO8:C2_00700W_A:C2_01540W_A:PR26:AMO1:THI20:C2_04340C_A:C2_05980C_A:PRB1:TPK2:ZCF10:APR1:C2_07430C_A:C2_07610C_A:RSP5:C2_09620W_A:MDH1-3:C2_10630W_A:C2_10670W_A:RPT2:C3_0040…	60261:16237:43162:9313:31137:6006:1901907:43171:45324:6574:1900443:45944:6043:71071:31939:30447:6002:9072:48315:55085:5998:6567:1900039:71361:6333:75306:6642:46177:71712:16577:7039:45461:9113:30474:45899:5982:7114:15867:43455:16320:6546:30968:6807:1900760:6046:19441:71285:45732:43248:6090:16052:6564:19358:1900239:34638:19660:35948:44182:46827:10995:70785:1080:19309:6511:71470:34629:6914:51306:635…
44281	small molecule metabolic process	153 out of 1090 genes, 14.0%	602 out of 6473 background genes, 9.3%	2.57e-05	0	RIM8:C1_00410C_A:UGA2:GAL1:SNZ1:LYS2:GOR1:COQ6:ICL1:GLT1:ANT1:CAT8:OLE1:GCV2:C1_08780W_A:DAK2:MLS1:URA1:C1_10240C_A:C1_10280C_A:C1_11610C_A:RIB3:CYB2:OSM2:C1_13880C_A:STF2:ARO8:C2_00390C_A:MSF1:C2_01530C_A:C2_01540W_A:ERG7:BNA31:ALD5:THI20:C2_04340C_A:LYS22:ARH2:PEX6:C2_05980C_A:ECM17:ARE2:ZCF10:C2_07430C_A:LEU42:ACS1:MDH1-3:C2_10630W_A:ETR1:BNA4:FOX2:PXP2:POX1-3:GLX3:FAA21:THI6:MET13:AIP2:PNP1:A…	1900535:9313:6006:1410:1901907:6535:6574:1900443:45944:9435:70507:30447:6002:9072:55085:5998:6567:6434:6116:19280:46177:8615:9113:6553:15867:6546:6807:9085:19441:6673:1901006:6771:6188:6725:6090:6564:19358:19660:35948:44182:34975:6003:6071:70785:1080:19309:19676:71470:70154:42823:6351:1901673:61414:42843:6735:6020:34599:8643:1901911:1901906:6430:1902114:36177:97237:70783:46835:1678:6730:6508:7030…
34219	carbohydrate transmembrane transport	19 out of 1090 genes, 1.7%	30 out of 6473 background genes, 0.5%	2.94e-05	0	HGT1:HGT2:GAL1:HGT8:HGT6:HGT20:ITR1:C2_09280C_A:HGT19:HGT4:HGT5:STD1:HGT17:NAG6:HGT18:HXT5:HXK2:GLK1:HGT14	15798:6006:30447:6002:16320:7029:19660:44182:8643:46835:1678:9405:15756:6012:1904679:36168:6000:33499:8645:15757:46015:411:6096:10255:36178:34605:36244:61024:45916:1904659:19631:51594:32445:5975:51156:6013:46323:1900429:15761:45835:19388:1302:9749:7165:15755:35690
55085	transmembrane transport	103 out of 1090 genes, 9.4%	365 out of 6473 background genes, 5.6%	3.03e-05	0	HOL4:HGT1:HGT2:GAL1:DIP5:DUR3:C1_06980C_A:CDR4:CTR2:YMC2:C1_09210C_A:C1_09220W_A:FTH1:DAL7:DUR7:LEU5:C2_00540W_A:HGT8:HGT6:HGT20:SSY1:ITR1:PEX6:C2_07580W_A:C2_09280C_A:C2_09590C_A:YOR1:HGT19:PMC1:AFG3:DAL5:DAL4:C3_03230C_A:FUR4:DAL9:AAP1:CDR11:DAL8:C3_04360W_A:HGT4:HGT5:GAP2:OAC1:C3_06710W_A:STD1:C3_07850W_A:CNH1:FRP1:PEX5:C4_00320C_A:TOK1:C4_00680W_A:HGT17:AGP2:SUL2:C4_03700W_A:C4_04250W_A:AGP3:…	15798:6006:33215:30447:6002:55085:316:42710:15691:55088:71805:15743:90515:15719:51515:16320:6814:98849:7029:70588:6749:1903714:19660:44182:71470:70154:30004:1990591:1901481:97623:6812:8643:30163:51604:30001:15848:6430:15809:35725:9651:36376:6865:46835:1678:6508:6879:45041:9405:15756:6012:6791:15840:70778:15677:35672:90518:6631:71996:1904679:32974:6820:90516:902:34486:9062:6855:16031:6873:15718:30…
6631	fatty acid metabolic process	30 out of 1090 genes, 2.8%	64 out of 6473 background genes, 1.0%	4e-05	0	ICL1:ANT1:OLE1:MLS1:PEX6:C2_05980C_A:MDH1-3:ETR1:FOX2:PXP2:POX1-3:FAA21:FAS2:PEX5:SPS20:CAT2:SCS7:ACH1:SFC1:DES1:FAT1:PEX7:POX1:POT1:ACC1:MCT1:CR_06070W_A:ALK8:ECI1:PEX13	1900535:1410:30447:55085:15867:6673:6735:70301:9405:9060:6631:9062:10430:71472:6665:30437:45333:30148:1:42759:71214:6097:19395:43936:36178:9437:6636:42760:30497:6084:19679:15741:8152:15976:36244:1676:48252:16562:42758:9267:44539:44011:42761:6606:7031:6675:46456:36170:6625:71469:5975:6635:15744:6099:55114:71216:16558:45733:34389:6083:43335:16560:46512:7124:1302:42318:38:6108:9059:6633
19752	carboxylic acid metabolic process	99 out of 1090 genes, 9.1%	350 out of 6473 background genes, 5.4%	5.19e-05	0	RIM8:C1_00410C_A:UGA2:SNZ1:LYS2:GOR1:ICL1:GLT1:ANT1:CAT8:OLE1:GCV2:MLS1:C1_10240C_A:C1_10280C_A:C1_11610C_A:CYB2:C1_13880C_A:ARO8:C2_00390C_A:MSF1:BNA31:ALD5:C2_04340C_A:LYS22:PEX6:C2_05980C_A:ECM17:ZCF10:LEU42:ACS1:MDH1-3:ETR1:BNA4:FOX2:PXP2:POX1-3:GLX3:FAA21:MET13:AIP2:ALT1:C3_03680W_A:FAS2:C3_06280W_A:DLD2:PEX5:CAR2:MET15:SPS20:CAT2:C4_02040W_A:ARG83:LYS4:SCS7:C4_04720W_A:ARG8:LYS1:ARO9:GDH3:I…	1900535:6006:1410:6535:6574:1900443:45944:30447:6002:9072:55085:6567:6434:19280:46177:8615:9113:6553:15867:6546:6807:9085:19441:6673:6090:6564:19660:35948:44182:70785:1080:19676:70154:42823:6351:61414:6735:34599:8643:6430:1902114:36177:70783:46835:1678:6730:6508:70301:6790:9405:44208:46416:9060:9073:19243:6631:9257:44416:19878:103:19722:6537:9062:10430:16031:52002:42450:70158:71472:6562:51321:194…
19395	fatty acid oxidation	12 out of 1090 genes, 1.1%	14 out of 6473 background genes, 0.2%	6.52e-05	0	ANT1:C2_05980C_A:MDH1-3:FOX2:PXP2:POX1-3:PEX5:CAT2:POX1:POT1:ALK8:ECI1	30447:15867:6735:9405:6631:9062:10430:45333:6097:19395:9437:42760:6084:8152:15976:48252:42758:44011:7031:46456:6625:5975:6635:6099:55114:16558:45733:16560:42318:6108
34440	lipid oxidation	12 out of 1090 genes, 1.1%	14 out of 6473 background genes, 0.2%	6.52e-05	0	ANT1:C2_05980C_A:MDH1-3:FOX2:PXP2:POX1-3:PEX5:CAT2:POX1:POT1:ALK8:ECI1	30447:15867:6735:9405:6631:9062:10430:45333:6097:19395:9437:42760:6084:8152:15976:48252:42758:44011:7031:46456:6625:5975:6635:6099:55114:16558:45733:16560:42318:6108
8643	carbohydrate transport	20 out of 1090 genes, 1.8%	34 out of 6473 background genes, 0.5%	7.42e-05	0	HGT1:HGT2:GAL1:HGT8:HGT6:HGT20:ITR1:C2_09280C_A:HGT19:HGT4:HGT5:STD1:HGT17:MAL31:NAG6:HGT18:HXT5:HXK2:GLK1:HGT14	15798:6006:30447:6002:55085:16320:7029:19660:44182:8643:46835:1678:9405:15756:6012:1904679:36168:6000:33499:8645:15757:46015:411:6096:10255:36178:34605:36244:61024:45916:1904659:19631:51594:32445:5975:51156:6013:46323:1900429:15761:45835:19388:1302:9749:7165:15755:35690
43436	oxoacid metabolic process	101 out of 1090 genes, 9.3%	362 out of 6473 background genes, 5.6%	8.02e-05	0	RIM8:C1_00410C_A:UGA2:SNZ1:LYS2:GOR1:ICL1:GLT1:ANT1:CAT8:OLE1:GCV2:MLS1:C1_10240C_A:C1_10280C_A:C1_11610C_A:CYB2:C1_13880C_A:ARO8:C2_00390C_A:MSF1:BNA31:ALD5:C2_04340C_A:LYS22:PEX6:C2_05980C_A:ECM17:ZCF10:LEU42:ACS1:MDH1-3:ETR1:BNA4:FOX2:PXP2:POX1-3:GLX3:FAA21:MET13:AIP2:ALT1:C3_03680W_A:FAS2:C3_06280W_A:DLD2:PEX5:CAR2:MET15:SPS20:CAT2:C4_02040W_A:ARG83:LYS4:SCS7:C4_04720W_A:ARG8:VPH1:LYS1:ARO9:G…	1900535:6006:1410:1901907:6535:6574:1900443:45944:30447:6002:9072:55085:6567:6434:19280:46177:8615:9113:6553:15867:6546:6807:9085:19441:6673:6090:6564:19660:35948:44182:70785:1080:19676:70154:42823:6351:61414:6735:34599:8643:1901911:1901906:6430:1902114:36177:70783:46835:1678:6730:6508:70301:6790:9405:44208:46416:9060:9073:19243:6631:9257:44416:19878:103:19722:6537:9062:10430:16031:52002:42450:70…
6082	organic acid metabolic process	101 out of 1090 genes, 9.3%	363 out of 6473 background genes, 5.6%	9.35e-05	0	RIM8:C1_00410C_A:UGA2:SNZ1:LYS2:GOR1:ICL1:GLT1:ANT1:CAT8:OLE1:GCV2:MLS1:C1_10240C_A:C1_10280C_A:C1_11610C_A:CYB2:C1_13880C_A:ARO8:C2_00390C_A:MSF1:BNA31:ALD5:C2_04340C_A:LYS22:PEX6:C2_05980C_A:ECM17:ZCF10:LEU42:ACS1:MDH1-3:ETR1:BNA4:FOX2:PXP2:POX1-3:GLX3:FAA21:MET13:AIP2:ALT1:C3_03680W_A:FAS2:C3_06280W_A:DLD2:PEX5:CAR2:MET15:SPS20:CAT2:C4_02040W_A:ARG83:LYS4:SCS7:C4_04720W_A:ARG8:VPH1:LYS1:ARO9:G…	1900535:6006:1410:1901907:6535:6574:1900443:45944:30447:6002:9072:55085:6567:6434:19280:46177:8615:9113:6553:15867:6546:6807:9085:19441:6673:6090:6564:19660:35948:44182:70785:1080:19676:70154:42823:6351:61414:6735:34599:8643:1901911:1901906:6430:1902114:36177:70783:46835:1678:6730:6508:70301:6790:9405:44208:46416:9060:9073:19243:6631:9257:44416:19878:103:19722:6537:9062:10430:16031:52002:42450:70…
1904659	glucose transmembrane transport	15 out of 1090 genes, 1.4%	23 out of 6473 background genes, 0.4%	0.00058	0	HGT1:HGT2:HGT8:HGT6:HGT20:ITR1:HGT19:HGT4:HGT5:STD1:HGT17:HGT18:HXK2:GLK1:HGT14	15798:6006:30447:6002:19660:44182:8643:46835:1678:9405:1904679:36168:6000:46015:6096:10255:36178:34605:36244:45916:1904659:19631:51594:32445:5975:51156:6013:46323:1900429:15761:45835:1302:9749:7165:15755:35690
5975	carbohydrate metabolic process	60 out of 1090 genes, 5.5%	193 out of 6473 background genes, 3.0%	0.00109	0	C1_01360C_A:GAL1:EXG2:TPS2:ICL1:GSL1:ATC1:SMI1:DAK2:MLS1:GCA1:GCA2:C1_14060W_A:MNN42:HSP21:C2_04340C_A:TPK2:MDH1-3:TPS3:FOX2:C3_03410C_A:SKN2:C3_07490W_A:FBP1:PHR3:BGL2:AMS1:RGT1:C4_02620C_A:GDB1:XKS1:SOU1:GUT2:AFL1:ROT2:C5_02220C_A:GRE3:HEX1:C5_05360C_A:PGA4:ARD:DOG1:GLC3:GAC1:GPH1:BMT3:GSY1:HXK2:UGP1:GUT1:CR_06030C_A:SOL3:GLK1:GLK4:HSP104:CR_08550W_A:SUC1:BGL22:INO1:MAL2	9313:31137:6006:1901907:45944:70507:30447:6002:5998:71361:6116:46177:5982:43455:1900760:6046:1904541:16052:1900239:19660:44182:34975:6003:46827:6071:19309:32995:71470:6351:1901673:42026:42843:6735:6020:45721:35617:34599:1901911:60257:1901906:23:6098:97237:46835:1678:9405:6012:70879:2000766:7346:32888:5987:51516:433:1904462:1903759:19571:5978:1900231:70880:1319:902:42149:9062:51321:5991:10607:4611…
6629	lipid metabolic process	80 out of 1090 genes, 7.3%	284 out of 6473 background genes, 4.4%	0.00147	0	C1_00410C_A:PSD1:PDR16:ICL1:ANT1:PLB5:OLE1:C1_08540C_A:LIP1:MLS1:LIP3:C1_11140W_A:PLD1:DPP2:NCR1:MUQ1:SMP2:BMT5:ERG7:FGR22:SCT2:PLC2:C2_03140C_A:PEX6:C2_05980C_A:ARE2:C2_07440C_A:C2_08170W_A:MDH1-3:ETR1:C3_00400C_A:FOX2:PXP2:POX1-3:SLD1:FAA21:C3_03680W_A:C3_03760W_A:FAS2:PEX5:SPS20:C4_00950C_A:CAT2:C4_02420C_A:SCS7:ALG1:YDC1:OBPA:ACH1:VPS4:SFC1:PSD2:RER2:C5_05360C_A:DES1:FAT1:PEX7:HAL21:C6_00980C…	1900535:71311:6490:1410:45324:71071:30447:55085:19432:46488:16126:6642:15914:7114:15867:6673:71285:7029:43942:34638:44182:1903940:6914:6735:15918:6679:6276:70301:6790:9405:6660:34210:90155:9060:1904462:70887:6631:6672:36149:16104:9306:103:6650:6888:19722:6688:44001:46777:42149:9062:10430:44255:18105:71472:19408:6665:10636:60237:30437:19752:16540:45333:7033:30148:32120:1:9058:70676:42538:42759:700…
44248	cellular catabolic process	141 out of 1090 genes, 12.9%	584 out of 6473 background genes, 9.0%	0.0028	0	C1_00410C_A:CIS2:SNF7:UGA2:C1_01890C_A:C1_02040C_A:RAD16:C1_02910C_A:GOR1:C1_03330C_A:ICL1:C1_04560W_A:CUE5:RPT1:AUT7:PRC3:C1_06390W_A:ANT1:ATC1:C1_08180C_A:CAT8:PLB5:GCV2:DOA1:MLS1:VPS41:C1_10240C_A:CDC48:RPN2:SEC2:DOA4:C1_14170W_A:DDI1:C1_14470W_A:C2_00230W_A:ARO8:C2_01540W_A:PR26:THI20:C2_04340C_A:MKK2:C2_05980C_A:SPO72:PRB1:TPK2:ZCF10:APR1:C2_07430C_A:C2_07610C_A:RSP5:C2_09620W_A:C2_10470C_A:…	60261:16237:43162:31137:32889:1901907:43171:45324:6574:1900443:45944:71071:6497:31939:30447:9072:48315:55085:6501:6567:1900039:71361:6333:75306:6642:46177:11:71712:1904184:16577:7039:45461:9113:30474:15031:45899:742:7114:15867:43455:16320:6546:6807:1900760:30968:34497:19441:46210:32147:71285:45732:43248:6090:6564:19358:1900239:34638:35948:71211:44182:46827:10995:70785:1080:6511:34629:15671:6906:5…
51704	multi-organism process	124 out of 1090 genes, 11.4%	519 out of 6473 background genes, 8.0%	0.02265	0.0007	TUP1:C1_00090W_A:KEL1:RIM8:SNF7:TPS2:CSH1:IFD6:ICL1:ATC1:SMI1:GCS1:OLE1:WOR1:GCA1:GCA2:PRM1:PLD1:FUS1:C1_13290W_A:HYR1:CYB2:C1_14060W_A:SOD4:DFG16:STE11:HSP21:KIC1:CRK1:WH11:PST1:RCK2:TPK2:PST2:IFF6:EAP1:FOX2:PMC1:IRO1:SLD1:SAP9:CSC25:ADE2:ZCF31:FAS2:NCE102:HGT4:TRY4:AAF1:MDS3:TCC1:CNH1:PHR3:PGA7:RBT5:ZCF21:SPS20:CAT2:BGL2:RGT1:CSH3:OSH3:SAP10:GYP1:VPS13:CZF1:ROT2:VPS1:OBPA:OBPALPHA:ZNC1:RIM21:CS…	2000601:1900535:6974:31137:6006:1410:36278:45324:30838:1900443:45944:6043:71071:70507:30447:437:31589:16310:55085:46488:43409:42710:71361:9272:1402:70417:70791:19280:11:2000247:55088:7039:45461:32065:742:5982:16320:43455:51666:6807:1900760:34307:44413:6046:7121:10972:7232:35955:46210:71285:6814:7029:70588:1904541:32220:16052:1900239:34638:19660:44182:34975:46827:7155:70785:31929:1080:32995:71470:…
44262	cellular carbohydrate metabolic process	37 out of 1090 genes, 3.4%	110 out of 6473 background genes, 1.7%	0.02354	0.0007	C1_01360C_A:GAL1:TPS2:ICL1:GSL1:ATC1:SMI1:DAK2:MLS1:GCA1:C1_14060W_A:MNN42:HSP21:C2_04340C_A:TPK2:TPS3:FOX2:SKN2:GDB1:GUT2:AFL1:ROT2:C5_02220C_A:PGA4:ARD:GLC3:GAC1:GPH1:BMT3:GSY1:HXK2:UGP1:GUT1:HSP104:SUC1:INO1:MAL2	31137:6006:1901907:70507:30447:6002:71361:6116:46177:5982:43455:1900760:1904541:16052:1900239:44182:34975:46827:6071:32995:71470:6351:1901673:42026:6020:45721:35617:34599:1901911:60257:1901906:23:97237:46835:1678:9405:6012:70879:2000766:7346:32888:5987:51516:433:1903759:19571:5978:1900231:70880:1319:902:9062:51321:5991:10607:6011:70414:7186:15959:36164:6000:25:33499:6075:10737:15757:6097:5992:140…
1901565	organonitrogen compound catabolic process	79 out of 1090 genes, 7.2%	301 out of 6473 background genes, 4.7%	0.03267	0.0013	CIS2:SNF7:UGA2:C1_01890C_A:C1_02040C_A:RAD16:C1_04560W_A:CUE5:RPT1:C1_06390W_A:GCV2:DOA1:CDC48:RPN2:DOA4:C1_14170W_A:DDI1:C1_14470W_A:C2_00230W_A:ARO8:C2_00700W_A:C2_01540W_A:PR26:AMO1:THI20:PRB1:APR1:C2_07430C_A:C2_07610C_A:RSP5:C2_09620W_A:C2_10670W_A:RPT2:AFG3:LAP41:DAL4:PNP1:ALT1:FUR4:MCA1:CYM1:C3_06280W_A:C3_07490W_A:C4_00070C_A:CAR2:C4_02040W_A:ARG83:C4_02920W_A:ECM38:C4_04270W_A:C4_04660C_…	16237:43162:1901907:43171:45324:6574:45944:71071:31939:30447:9072:55085:6567:1900039:6333:71712:7039:9113:30474:45899:16320:6546:30968:6807:19441:71285:45732:43248:6090:6564:19358:34638:44182:10995:1080:6511:34629:6914:51306:45721:1905530:1901911:30163:51604:72665:34517:1901906:715:10793:747:36177:6730:34613:6508:45041:9405:6660:19220:9230:720:44010:61166:70887:9073:32436:72344:9257:44416:30433:6…
6733	oxidoreduction coenzyme metabolic process	17 out of 1090 genes, 1.6%	36 out of 6473 background genes, 0.6%	0.04375	0.0025	C1_00410C_A:COQ6:C1_08780W_A:C2_01530C_A:BNA31:ARH2:C2_07430C_A:BNA4:PNP1:POS5:C5_00800C_A:C6_02030C_A:C6_03620C_A:C7_00300W_A:NPT1:CR_00350W_A:CR_10600C_A	9435:30447:19441:1901006:19358:34599:6879:6348:6216:6665:46115:36164:6139:6470:6148:183:33494:46185:9116:6081:32180:34356:8152:34354:6741:9267:36171:46135:34276:36170:46496:8655:6218:19674:71216:55114:6744:36180:1302:46281
Molecular function
GOID	GO_term	Cluster frequency	Background frequency	Corrected P-value	False discovery rate	Gene(s) annotated to the term	Directly Annotated GOID List
16491	oxidoreductase activity	127 out of 1090 genes, 11.7%	429 out of 6473 background genes, 6.6%	3.94e-09	0	C1_00410C_A:C1_00630W_A:SOD2:UGA2:LYS2:GOR1:COQ6:DAO1:CSH1:IFD6:C1_04460C_A:LPG20:SDH1:GLT1:OLE1:GCV2:AOX2:AOX1:URA1:C1_09780C_A:C1_10280C_A:C1_11290W_A:MRF1:C1_11890W_A:CYB2:OSM2:SOD6:SOD4:C2_01540W_A:EBP7:ALD5:DLD1:AMO1:YIM1:C2_04480W_A:ARH2:C2_05130W_A:OSM1:ECM17:PST1:C2_07070W_A:IFM3:C2_08100W_A:PST2:C2_08850C_A:MET10:C2_09620W_A:IFR1:MDH1-3:ETR1:BNA4:DOT5:FOX2:PXP2:POX1-3:SLD1:MET13:AIP2:C3_…	3779:16638:16652:42284:18456:5506:71949:4090:4768:50625:16491:4316:16614:51990:16747:16620:8379:4364:19153:3997:4489:287:4033:46872:15930:18576:18484:3960:4738:8199:45703:16655:5524:51268:4300:4733:46592:4175:4329:3884:16639:9013:16616:47964:3697:47019:16712:3756:4174:34648:31177:3677:16903:4602:3824:104:8336:19825:4754:16209:16651:32454:4591:4458:16705:4746:10181:51082:4783:4158:1227:30060:16156…
43167	ion binding	257 out of 1090 genes, 23.6%	1113 out of 6473 background genes, 17.2%	1.07e-06	0	TUP1:C1_00630W_A:SOD2:GAL1:C1_02740C_A:RAD16:LYS2:MAS1:C1_03330C_A:C1_03450C_A:COQ6:TUS1:RPT1:SDH1:ZCF2:AUT7:NPR1:ZCF23:CCS1:CDR4:C1_08180C_A:CAT8:C1_08340C_A:GCV2:CAF16:C1_08540C_A:AFG1:LYS143:DAK2:LYS142:CRP1:C1_09440W_A:VPS41:CDC48:C1_11290W_A:CTA3:PLD1:C1_12120W_A:SEC2:AKR1:KNS1:C1_14050C_A:C1_14170W_A:MLH3:C1_14470W_A:SOD6:C2_00280C_A:ARO8:C2_00350W_A:C2_00390C_A:ZCF9:SOD4:C2_00700W_A:MSF1:B…	8483:4712:5543:16531:30552:8349:4090:50625:15086:4396:46899:4316:8233:70273:16747:4124:43495:16597:44604:4340:978:4017:16813:16810:18576:3960:4738:8199:36137:32450:31681:4638:5524:8793:62:42626:4733:3906:5047:4329:3844:4594:5484:35091:3684:4559:17049:8603:3697:47804:3952:49:16301:3992:3824:16773:44025:30976:36459:32454:4075:4371:8289:4591:31071:8117:4458:5089:10181:16409:4826:5085:5534:4375:5078:…
48037	cofactor binding	73 out of 1090 genes, 6.7%	233 out of 6473 background genes, 3.6%	1.16e-05	0	C1_00630W_A:C1_02740C_A:LYS2:GOR1:COQ6:SDH1:GLT1:OLE1:GCV2:C1_10280C_A:C1_11290W_A:C1_12140W_A:CYB2:OSM2:ARO8:C2_00390C_A:BNA32:EBP7:BNA31:DLD1:AMO1:BIO32:ECM17:PST1:IFM3:PST2:C2_08850C_A:C2_09670C_A:BNA4:PXP2:POX1-3:C3_02120W_A:SLD1:AIP2:ALT1:C3_03680W_A:DLD2:PGA7:RBT5:CAR2:MET15:PDC12:LYS4:SCS7:ARG8:NBP35:ARO9:OYE32:AFL1:C5_00800C_A:C6_00210W_A:COX15:YMX6:POX1:SHM2:SPL1:GPH1:CR_00130C_A:ALK2:CR…	828:8483:4768:50625:4409:4124:52723:15930:4738:36137:8793:62:4733:16639:47964:16616:47804:101011:3992:104:3824:30976:16651:830:4591:31071:8117:4458:10181:4375:3955:831:5507:4148:8762:18685:4043:16709:47046:4123:3995:51539:9055:4833:8941:4497:4502:16627:80132:51537:3779:16638:5506:71949:16212:16491:16614:51990:16620:8184:3997:287:16655:16831:52724:33857:16712:31177:829:4021:16887:19825:3861:47536:…
8233	peptidase activity	46 out of 1090 genes, 4.2%	130 out of 6473 background genes, 2.0%	0.0001	0	CIS2:C1_02040C_A:MAS1:PRD1:PRC3:C1_06390W_A:RPN2:RBD1:DOA4:DDI1:C1_14470W_A:SAP30:C2_00700W_A:SAP99:YIM1:PRB1:APR1:C2_08620W_A:AFG3:LAP41:C3_02970C_A:ECM14:SAP9:MCA1:C3_05360C_A:CYM1:C4_00070C_A:ECM38:SAP10:C4_04660C_A:YME1:PRC2:SAP6:PEP3:SAP5:SAP1:C6_03960W_A:TSM1:C6_04650W_A:VPS70:KEX1:CPY1:C7_03860W_A:LAP3:SSY5:PUP1	8233:16747:978:8239:5524:35091:3697:4177:3824:36459:4198:1990380:4190:61665:31625:4181:19784:36374:4176:3729:31593:4185:16491:3690:4180:4222:46872:3682:4175:16887:4252:4298:4843:70006:8270:17111:8234:30674:42802:149:8237:43130:166:32183:4197
3824	catalytic activity	58 out of 1090 genes, 5.3%	180 out of 6473 background genes, 2.8%	0.00011	0	C1_00410C_A:CIS2:PSD1:C1_00630W_A:C1_01360C_A:C1_01400C_A:SOD2:UGA2:C1_02040C_A:GAL1:SNZ1:EXG2:RAD16:LYS2:GOR1:MAS1:EHD3:TPS2:COQ6:DAO1:CSH1:IFD6:C1_04460C_A:ICL1:C1_04560W_A:C1_04640W_A:LPG20:MNN15:C1_05160C_A:RPT1:SDH1:PRD1:GSL1:PRC3:C1_05830W_A:C1_06390W_A:GLT1:NPR1:ATC1:C1_07080W_A:GCS1:CDR4:TERT:NTG1:PLB5:OLE1:GCV2:CAF16:C1_08540C_A:C1_08780W_A:AFG1:AOX2:AOX1:DAK2:C1_09440W_A:LIP1:DOA1:MLS1:…	8448:4143:8349:4338:4396:4316:8379:33919:47407:978:4340:4035:52723:4017:16813:16810:8239:18576:4738:47499:36137:45703:3986:4638:4722:42123:42626:46547:3906:4329:3844:4794:42392:16639:3684:16616:3887:3697:4000:4519:4018:4174:4789:16903:49:4602:16301:3992:3824:34431:4651:44025:30976:32454:4591:4198:4458:10181:8171:4826:4190:4375:8410:43022:3735:4335:3955:43531:61665:3937:9378:4709:42300:4474:8948:7…
16787	hydrolase activity	195 out of 1090 genes, 17.9%	848 out of 6473 background genes, 13.1%	0.00023	0	CIS2:C1_01400C_A:C1_02040C_A:SNZ1:EXG2:RAD16:MAS1:EHD3:TPS2:C1_04640W_A:C1_05160C_A:RPT1:PRD1:PRC3:C1_06390W_A:ATC1:C1_07080W_A:CDR4:NTG1:PLB5:CAF16:C1_08780W_A:AFG1:C1_09440W_A:LIP1:DOA1:LIP3:GCA1:GCA2:CDC48:PLD1:DPP2:RPN2:RBD1:DOA4:C1_14050C_A:C1_14060W_A:DDI1:C1_14470W_A:C2_00350W_A:SAP30:C2_00700W_A:C2_01450C_A:PPE1:C2_01530C_A:SMP2:C2_02490C_A:FGR22:BNA31:HYU1:PLC2:PR26:C2_03140C_A:THI20:HSP…	8448:4338:33919:47407:978:4035:52723:16813:16810:8239:47499:3986:4722:42123:42626:3906:4329:3844:42392:3684:3697:4000:4519:49:3824:34431:4651:4198:4190:8410:43022:3735:43531:61665:3937:9378:70635:31625:4620:8474:16884:61630:51015:405:19888:4623:19784:4806:4407:51539:4563:3676:3860:4185:4359:16160:16740:5506:16212:19002:120108:4741:400:3690:71933:3743:4180:71618:287:46872:4526:1990165:3689:3682:50…
43168	anion binding	160 out of 1090 genes, 14.7%	672 out of 6473 background genes, 10.4%	0.00033	0	TUP1:C1_00630W_A:GAL1:C1_02740C_A:RAD16:LYS2:C1_03330C_A:C1_03450C_A:COQ6:TUS1:RPT1:SDH1:AUT7:NPR1:CDR4:C1_08180C_A:C1_08340C_A:GCV2:CAF16:C1_08540C_A:AFG1:DAK2:VPS41:CDC48:C1_11290W_A:PLD1:C1_12120W_A:SEC2:KNS1:C1_14050C_A:MLH3:ARO8:C2_00350W_A:C2_00390C_A:C2_00700W_A:MSF1:BCY1:C2_01530C_A:BNA32:EBP7:BNA31:DLD1:PR26:HSP78:STE11:SSY1:C2_04280W_A:KIC1:CRK1:CDC15:BIO32:PEX6:MKK2:RFC1:SPO72:ECM17:PS…	5543:30552:8349:4396:70273:44604:4340:4017:16810:4738:36137:4638:62:42626:4329:5484:3684:3697:49:16301:3992:3824:44025:30976:4591:4458:10181:4826:5085:4375:43022:4335:3955:4862:43531:9378:4709:8762:31625:3987:15431:61630:5536:51015:405:19888:4824:3676:42393:16627:4359:19205:17112:16638:5506:71949:16212:4828:19002:120108:62037:16614:400:4674:3690:8184:71933:3743:3997:287:8865:46872:1990165:3689:36…
50662	coenzyme binding	50 out of 1090 genes, 4.6%	152 out of 6473 background genes, 2.3%	0.0004	0	C1_00630W_A:C1_02740C_A:GOR1:COQ6:SDH1:GCV2:C1_10280C_A:C1_11290W_A:ARO8:C2_00390C_A:BNA32:EBP7:BNA31:DLD1:BIO32:ECM17:PST1:IFM3:PST2:C2_08850C_A:BNA4:PXP2:POX1-3:C3_02120W_A:AIP2:ALT1:C3_03680W_A:DLD2:CAR2:MET15:PDC12:ARG8:ARO9:OYE32:C6_00210W_A:YMX6:POX1:SHM2:SPL1:GPH1:CR_00130C_A:OYE22:LYS12:PDX3:YCP4:PST3:CR_07250C_A:LPD1:CR_08000C_A:CR_08920W_A	4738:36137:62:16616:3992:3824:30976:4591:4458:10181:4375:3955:8762:16627:16638:5506:71949:16212:16614:8184:3997:287:16655:16712:4061:51536:20037:50660:4587:8483:50625:4124:8793:4733:47964:47804:31071:8117:4148:16709:47046:4123:3995:4502:3779:16491:51990:16620:16831:4021:47536:4783:70403:51287:3961:4121:8177:4372:30170
5215	transporter activity	103 out of 1090 genes, 9.4%	393 out of 6473 background genes, 6.1%	0.00046	0	HOL4:HGT1:HGT2:DIP5:PDR16:DUR3:GPT1:ANT1:C1_06980C_A:C1_07440W_A:CDR4:C1_08180C_A:CTR2:YMC2:C1_09210C_A:C1_09220W_A:CRP1:FTH1:DAL7:DUR7:LEU5:C2_00540W_A:C2_00550W_A:HGT8:HGT6:C2_02490C_A:HGT20:ITR1:LEM3:C2_07580W_A:C2_09280C_A:C2_09590C_A:YOR1:HGT19:PMC1:DAL5:DAL4:C3_03230C_A:FUR4:DAL9:PEP8:CDR11:DAL8:C3_04360W_A:HGT4:HGT5:GAP2:OAC1:C3_06710W_A:C3_07850W_A:CNH1:TOK1:C4_00680W_A:HGT17:SUL2:C4_0311…	5543:44604:15190:42626:61608:15535:3824:15189:5310:15182:5313:61459:1903425:32934:15191:1901235:5215:15297:140318:295:15431:22857:5324:15379:15205:15296:5216:46872:15077:15194:8028:15386:15299:15181:15078:16887:15171:5337:5365:15131:15116:46873:17111:90555:31957:15247:8271:38023:15188:15183:140345:8526:15081:15086:15203:5290:35673:5524:5274:8289:5315:19531:5375:5507:15204:5355:120015:71916:34257:…
70011	peptidase activity, acting on L-amino acid peptides	42 out of 1090 genes, 3.9%	120 out of 6473 background genes, 1.9%	0.00049	0	CIS2:C1_02040C_A:MAS1:PRD1:PRC3:C1_06390W_A:RPN2:RBD1:DOA4:DDI1:C1_14470W_A:SAP30:C2_00700W_A:SAP99:YIM1:PRB1:APR1:C2_08620W_A:AFG3:LAP41:C3_02970C_A:ECM14:SAP9:MCA1:C3_05360C_A:CYM1:ECM38:SAP10:C4_04660C_A:YME1:PRC2:SAP6:SAP5:SAP1:C6_03960W_A:TSM1:KEX1:CPY1:C7_03860W_A:LAP3:SSY5:PUP1	978:8239:3697:3824:4198:4190:61665:31625:19784:4185:3690:4180:46872:3682:4175:16887:8270:17111:8234:42802:43130:32183:8233:16747:5524:4177:36459:1990380:4181:36374:4176:3729:31593:16491:4222:4252:4298:4843:70006:149:8237:166:4197
51119	sugar transmembrane transporter activity	15 out of 1090 genes, 1.4%	25 out of 6473 background genes, 0.4%	0.00075	0	HGT1:HGT2:HGT8:HGT6:HGT20:ITR1:C2_09280C_A:HGT19:HGT4:HGT5:HGT17:MAL31:HGT18:HXT5:HGT14	15535:5365:38023:5355:51119
15149	hexose transmembrane transporter activity	13 out of 1090 genes, 1.2%	20 out of 6473 background genes, 0.3%	0.00107	0	HGT1:HGT2:HGT8:HGT6:HGT20:ITR1:C2_09280C_A:HGT19:HGT4:HGT5:HGT17:HGT18:HGT14	15535:5365:38023:5355:51119
15144	carbohydrate transmembrane transporter activity	15 out of 1090 genes, 1.4%	26 out of 6473 background genes, 0.4%	0.0015	0	HGT1:HGT2:HGT8:HGT6:HGT20:ITR1:C2_09280C_A:HGT19:HGT4:HGT5:HGT17:MAL31:HGT18:HXT5:HGT14	15535:5365:38023:5355:51119
16298	lipase activity	21 out of 1090 genes, 1.9%	45 out of 6473 background genes, 0.7%	0.00161	0	C1_04640W_A:PLB5:LIP1:DOA1:LIP3:PLD1:FGR22:PLC2:C2_03140C_A:C2_07440C_A:C3_00400C_A:C4_00950C_A:C6_00980C_A:ATG15:PLB1:LIP4:LIP5:LIP8:RBR2:CR_08300C_A:LIP7	47499:4620:4623:4806:71618:46872:4771:42171:43130:32266:16788:8138:4435:4622:4630:16298:5199
5355	glucose transmembrane transporter activity	12 out of 1090 genes, 1.1%	19 out of 6473 background genes, 0.3%	0.00422	0	HGT1:HGT2:HGT8:HGT6:HGT20:ITR1:HGT19:HGT4:HGT5:HGT17:HGT18:HGT14	5365:38023:5355:51119
22857	transmembrane transporter activity	91 out of 1090 genes, 8.3%	354 out of 6473 background genes, 5.5%	0.00492	0.0012	HOL4:HGT1:HGT2:DIP5:DUR3:GPT1:ANT1:C1_06980C_A:CDR4:CTR2:YMC2:C1_09210C_A:C1_09220W_A:CRP1:FTH1:DAL7:DUR7:LEU5:C2_00540W_A:C2_00550W_A:HGT8:HGT6:C2_02490C_A:HGT20:ITR1:C2_07580W_A:C2_09280C_A:C2_09590C_A:YOR1:HGT19:PMC1:DAL5:DAL4:C3_03230C_A:FUR4:DAL9:CDR11:DAL8:C3_04360W_A:HGT4:HGT5:GAP2:OAC1:C3_06710W_A:C3_07850W_A:CNH1:TOK1:C4_00680W_A:HGT17:SUL2:C4_03700W_A:C4_04250W_A:AGP3:VPH1:C4_06910W_A:C…	44604:15190:42626:15535:15189:5310:15182:5313:61459:1903425:15191:1901235:15297:295:15431:22857:15379:15205:15296:5216:46872:15077:15194:8028:15386:15299:15181:15078:16887:15171:5337:5365:15131:15116:46873:17111:8271:38023:15188:15183:15081:15086:15203:5290:35673:5524:5274:5315:19531:5375:5507:15204:5355:71916:34257:46961:15220:15489:15174:43682:5469:1901239:15185:5302:34658:15606:46583:5249:4291…
15145	monosaccharide transmembrane transporter activity	13 out of 1090 genes, 1.2%	22 out of 6473 background genes, 0.3%	0.00494	0.0012	HGT1:HGT2:HGT8:HGT6:HGT20:ITR1:C2_09280C_A:HGT19:HGT4:HGT5:HGT17:HGT18:HGT14	15535:5365:38023:5355:51119
5310	dicarboxylic acid transmembrane transporter activity	10 out of 1090 genes, 0.9%	14 out of 6473 background genes, 0.2%	0.005	0.0011	DIP5:C2_07580W_A:OAC1:C3_07850W_A:C4_04250W_A:SFC1:C6_04110W_A:YCF1:CR_05480W_A:CR_08200C_A	44604:42626:15189:5310:5313:61459:15431:22857:15194:15181:16887:15131:15116:17111:15183:15086:5290:5524:19531:5469:1901239:5302:34658:15140:15127
4175	endopeptidase activity	26 out of 1090 genes, 2.4%	70 out of 6473 background genes, 1.1%	0.01845	0.0011	MAS1:PRD1:RPN2:RBD1:DDI1:SAP30:C2_00700W_A:SAP99:YIM1:PRB1:APR1:AFG3:C3_02970C_A:SAP9:MCA1:C3_05360C_A:CYM1:SAP10:YME1:SAP6:SAP5:SAP1:C7_03860W_A:LAP3:SSY5:PUP1	978:3697:3824:4198:4190:61665:31625:3690:46872:4175:16887:8270:17111:8234:42802:43130:32183:8233:16747:5524:4177:4176:3729:31593:16491:4222:4252:4298:149:8237:166:4197
15103	inorganic anion transmembrane transporter activity	16 out of 1090 genes, 1.5%	34 out of 6473 background genes, 0.5%	0.02172	0.001	DAL7:DAL5:DAL9:DAL8:C3_04360W_A:OAC1:C3_06710W_A:SUL2:C6_04550C_A:C7_00270W_A:C7_01990C_A:C7_04160W_A:CR_01320C_A:GEF2:SSU1:CR_10770W_A	1903425:22857:15379:15296:5216:15131:15116:8271:71916:1901239:34658:15124:319:5247
30170	pyridoxal phosphate binding	18 out of 1090 genes, 1.7%	41 out of 6473 background genes, 0.6%	0.02311	0.001	GCV2:ARO8:C2_00390C_A:BNA32:BNA31:BIO32:ALT1:C3_03680W_A:CAR2:MET15:ARG8:ARO9:C6_00210W_A:SHM2:SPL1:GPH1:CR_00130C_A:CR_08000C_A	36137:3992:3824:4375:16212:8184:4061:4587:8483:4124:8793:47804:31071:8117:4123:16831:4021:47536:3961:4121:4372:30170
70279	vitamin B6 binding	18 out of 1090 genes, 1.7%	41 out of 6473 background genes, 0.6%	0.02311	0.0009	GCV2:ARO8:C2_00390C_A:BNA32:BNA31:BIO32:ALT1:C3_03680W_A:CAR2:MET15:ARG8:ARO9:C6_00210W_A:SHM2:SPL1:GPH1:CR_00130C_A:CR_08000C_A	36137:3992:3824:4375:16212:8184:4061:4587:8483:4124:8793:47804:31071:8117:4123:16831:4021:47536:3961:4121:4372:30170
8509	anion transmembrane transporter activity	35 out of 1090 genes, 3.2%	109 out of 6473 background genes, 1.7%	0.03283	0.0009	DIP5:GPT1:C1_06980C_A:DAL7:LEU5:C2_07580W_A:DAL5:C3_03230C_A:DAL9:DAL8:C3_04360W_A:GAP2:OAC1:C3_06710W_A:C3_07850W_A:CNH1:SUL2:C4_03700W_A:C4_04250W_A:AGP3:SFC1:NHX1:C6_03540W_A:C6_04110W_A:C6_04550C_A:C7_00270W_A:C7_01990C_A:YCF1:C7_04160W_A:CR_01320C_A:GEF2:CR_05480W_A:CR_08200C_A:SSU1:CR_10770W_A	44604:15190:42626:15189:5310:15182:5313:61459:1903425:15191:15431:22857:15379:15296:5216:15077:15194:8028:15386:15299:15181:16887:15171:15131:15116:46873:17111:8271:15188:15183:15081:15086:15203:5290:5524:19531:71916:15174:5469:1901239:15185:5302:34658:46583:42910:15124:319:5247:15385:15491:15140:15127:15193:1761:15228
16614	oxidoreductase activity, acting on CH-OH group of donors	26 out of 1090 genes, 2.4%	73 out of 6473 background genes, 1.1%	0.04234	0.0008	C1_00630W_A:GOR1:CSH1:IFD6:LPG20:CYB2:DLD1:IFM3:C2_08850C_A:MDH1-3:FOX2:AIP2:FAS2:DLD2:SOU1:GUT2:GRE3:ARD:C7_03350C_A:LYS12:ADH5:IDP2:CR_06070W_A:CR_07250C_A:CR_09100C_A:XYL2	4316:45703:16616:3824:4458:8762:50085:3939:71949:16614:287:4300:47019:30060:8270:47018:32115:3857:20037:50660:18456:4090:16747:4033:47964:50236:4368:47046:3729:3779:16652:16491:51990:51268:4460:51287:4032:51269:4312:32866:4315:4450:8897:47002
Cellular component
GOID	GO_term	Cluster frequency	Background frequency	Corrected P-value	False discovery rate	Gene(s) annotated to the term	Directly Annotated GOID List
42579	microbody	38 out of 1090 genes, 3.5%	70 out of 6473 background genes, 1.1%	2.61e-10	0	ICL1:C1_04560W_A:ANT1:MLS1:C1_11010C_A:C1_11890W_A:C2_00190C_A:C2_00390C_A:PEX6:C2_05980C_A:MDH1-3:FOX2:PXP2:POX1-3:FAA21:C3_03590W_A:CTN3:C3_04800C_A:PEX5:C4_00320C_A:SPS20:CAT2:VPS1:C5_01350W_A:PEX4:FAT1:C6_00850W_A:PEX7:C6_02410W_A:POX1:C7_00120W_A:POT1:PXA1:OPT3:PEX14:PEX19:ECI1:PEX13	5737:5829:5758:5739:5783:5777:5782:30479:5779:329:16021:5886:71782:5743:31235:5770:138:1990429:16020:5778:5811:1990415:5741:34657
5777	peroxisome	38 out of 1090 genes, 3.5%	70 out of 6473 background genes, 1.1%	2.61e-10	0	ICL1:C1_04560W_A:ANT1:MLS1:C1_11010C_A:C1_11890W_A:C2_00190C_A:C2_00390C_A:PEX6:C2_05980C_A:MDH1-3:FOX2:PXP2:POX1-3:FAA21:C3_03590W_A:CTN3:C3_04800C_A:PEX5:C4_00320C_A:SPS20:CAT2:VPS1:C5_01350W_A:PEX4:FAT1:C6_00850W_A:PEX7:C6_02410W_A:POX1:C7_00120W_A:POT1:PXA1:OPT3:PEX14:PEX19:ECI1:PEX13	5737:5829:5758:5739:5783:5777:5782:30479:5779:329:16021:5886:71782:5743:31235:5770:138:1990429:16020:5778:5811:1990415:5741:34657
71944	cell periphery	191 out of 1090 genes, 17.5%	754 out of 6473 background genes, 11.6%	5.75e-08	0	KEL1:RIM8:SNF7:HOL4:HGT1:HGT2:DIP5:EXG2:C1_03100W_A:C1_03450C_A:PDR16:CSH1:DUR3:KOG1:GSL1:NPR1:ATC1:C1_06980C_A:C1_07440W_A:IST2:BBC1:CDR4:BUD6:C1_08180C_A:PLB5:C1_08540C_A:CTR2:AOX2:C1_09210C_A:C1_09220W_A:CRP1:FTH1:C1_10090C_A:GCA1:C1_10420C_A:CDC48:CTA3:FUS1:SEC2:C1_13290W_A:HYR1:DAL7:MDG1:DDI1:PGA52:C2_00190C_A:DFG5:SOD4:C2_00940W_A:HGT8:HGT6:BCY1:SLA1:HGT20:PAN1:DFG16:STE11:SSY1:C2_04850C_A:…	99079:5628:9986:44853:46658:30133:70867:51286:30427:329:5816:5826:5621:35839:1990964:1990023:220:32153:5887:9898:151:148:36266:5797:1990531:110131:31562:932:5635:31931:44459:935:30140:138:33179:32177:43332:31520:30176:33573:139:1902716:5789:31160:30134:120105:5935:34098:145:30445:5761:62040:5768:131:1990112:48471:32178:5794:97038:5938:71944:71341:32126:30287:31235:16020:70319:5634:32168:10494:557…
16020	membrane	297 out of 1090 genes, 27.2%	1309 out of 6473 background genes, 20.2%	1.63e-07	0	C1_00090W_A:RIM8:C1_00410C_A:PSD1:SNF7:C1_01400C_A:HOL4:HGT1:C1_02040C_A:HGT2:DIP5:EXG2:LYS2:C1_02960C_A:C1_03100W_A:C1_03330C_A:C1_03490W_A:COQ6:DUR3:GPT1:C1_05120W_A:SDH1:KOG1:GSL1:AUT7:MDM34:BPH1:ANT1:NPR1:C1_06840C_A:C1_06980C_A:CCS1:C1_07440W_A:IST2:CDR4:C1_08180C_A:OLE1:C1_08540C_A:CTR2:C1_08780W_A:AOX2:AOX1:C1_09210C_A:C1_09220W_A:CRP1:FTH1:URA1:TVP18:VPS41:GCA1:C1_10420C_A:SFT2:CDC48:C1_1…	5628:9986:44853:407:46658:30133:31966:70867:51286:329:5759:1904423:1990023:97042:30906:220:32153:5887:98562:9898:151:99616:148:33565:30126:36266:30131:5797:19867:1990531:932:71595:5635:31931:44459:935:30140:33179:138:32865:5778:44232:31201:43332:31520:31942:30176:33573:5789:139:35859:30134:34098:5935:145:30445:5776:1990415:44695:62040:5761:131:5768:1990112:48471:1990316:32178:5794:5938:71944:7134…
5886	plasma membrane	132 out of 1090 genes, 12.1%	509 out of 6473 background genes, 7.9%	1.35e-05	0	RIM8:SNF7:HOL4:HGT1:HGT2:DIP5:EXG2:C1_03100W_A:DUR3:KOG1:GSL1:NPR1:C1_06980C_A:C1_07440W_A:IST2:CDR4:C1_08180C_A:C1_08540C_A:CTR2:AOX2:C1_09210C_A:C1_09220W_A:CRP1:FTH1:GCA1:C1_10420C_A:CDC48:FUS1:HYR1:DAL7:MDG1:DDI1:PGA52:C2_00190C_A:DFG5:C2_00940W_A:HGT8:HGT6:BCY1:HGT20:DFG16:STE11:SSY1:ITR1:LEM3:PNG2:RTA3:PST1:RSP5:PST2:C2_09280C_A:EAP1:YOR1:HGT19:BNA4:AFG3:DAL5:DAL4:FUR4:DAL9:PHB1:SAP9:CSC25:…	5628:9986:44853:46658:70867:51286:329:1990023:220:32153:5887:9898:151:148:36266:5797:1990531:5635:31931:44459:935:30140:138:33179:43332:31520:30176:33573:139:5789:30134:34098:5935:145:30445:62040:5761:131:5768:1990112:48471:32178:5794:5938:71944:32126:31235:16020:5634:10494:5576:5745:324:31234:5886:790:35838:5952:815:31307:5622:5737:31097:5777:31932:837:10008:71782:5743:9277:5933:31934:5740:19897…
44438	microbody part	18 out of 1090 genes, 1.7%	31 out of 6473 background genes, 0.5%	7.91e-05	0	ICL1:ANT1:MLS1:C1_11010C_A:C2_00190C_A:MDH1-3:POX1-3:C3_04800C_A:PEX5:C4_00320C_A:SPS20:C5_01350W_A:C6_00850W_A:POT1:PXA1:PEX14:PEX19:PEX13	5778:1990415:5782:5886:1990429:5737:5777:71782:16021:5829:5758:5739:5783:5779
44439	peroxisomal part	18 out of 1090 genes, 1.7%	31 out of 6473 background genes, 0.5%	7.91e-05	0	ICL1:ANT1:MLS1:C1_11010C_A:C2_00190C_A:MDH1-3:POX1-3:C3_04800C_A:PEX5:C4_00320C_A:SPS20:C5_01350W_A:C6_00850W_A:POT1:PXA1:PEX14:PEX19:PEX13	5778:1990415:5782:5886:1990429:5737:5777:71782:16021:5829:5758:5739:5783:5779
5773	vacuole	60 out of 1090 genes, 5.5%	189 out of 6473 background genes, 2.9%	8.04e-05	0	CIS2:DIP5:C1_03330C_A:C1_05120W_A:PRD1:KOG1:AUT7:PRC3:ATC1:CTR2:C1_08780W_A:FTH1:VPS41:NCR1:SMP2:C2_02490C_A:RTA3:PRB1:TPK2:APR1:C2_08700C_A:C2_10470C_A:C2_10870W_A:PMC1:AFG3:LAP41:C3_02970C_A:DAL4:FUR4:C3_04360W_A:C3_04460W_A:GAP2:C3_06710W_A:C3_07850W_A:C4_00680W_A:AGP2:AMS1:C4_03700W_A:ATG1:VPH1:TFS1:VPS1:C5_01420W_A:C6_00240C_A:NHX1:ATG15:CTA1:PEP3:C6_04110W_A:FMP45:YCF1:CPY1:C7_03860W_A:HSE1…	5628:407:51286:329:5759:97042:220:5887:32153:33565:5797:932:5635:31931:44459:33179:31201:31520:33573:5789:139:31160:30134:35859:5776:5768:48471:1990316:32178:5794:5938:5773:30287:16020:5634:10494:5576:5745:31965:324:1990816:5886:790:19898:71627:5952:5737:5777:30897:5743:9277:5802:45121:306:120095:34270:97002:5769:5774:16021:5771:5770:421:5811:5829:5758:328:5783:5739:30479:33101:33263:5775:61908:3…
322	storage vacuole	56 out of 1090 genes, 5.1%	176 out of 6473 background genes, 2.7%	0.00018	0	CIS2:DIP5:C1_03330C_A:C1_05120W_A:PRD1:KOG1:AUT7:PRC3:ATC1:CTR2:C1_08780W_A:FTH1:VPS41:NCR1:C2_02490C_A:RTA3:PRB1:TPK2:APR1:C2_08700C_A:C2_10870W_A:PMC1:AFG3:LAP41:C3_02970C_A:DAL4:FUR4:C3_04360W_A:C3_04460W_A:GAP2:C3_07850W_A:C4_00680W_A:AGP2:AMS1:C4_03700W_A:ATG1:VPH1:TFS1:VPS1:C5_01420W_A:C6_00240C_A:NHX1:CTA1:PEP3:C6_04110W_A:FMP45:YCF1:CPY1:C7_03860W_A:HSE1:HGT18:CR_06560C_A:PTC6:CR_08200C_A…	5628:407:51286:329:5759:97042:220:5887:32153:33565:5797:932:5635:31931:44459:33179:31201:31520:33573:5789:139:31160:30134:35859:5776:5768:48471:1990316:32178:5794:5938:30287:16020:5634:10494:5576:5745:324:1990816:5886:790:19898:71627:5952:5737:5777:30897:5743:9277:5802:45121:306:120095:34270:97002:5769:16021:5771:5770:421:5829:5758:328:5739:5783:30479:33101:33263:61908
323	lytic vacuole	56 out of 1090 genes, 5.1%	176 out of 6473 background genes, 2.7%	0.00018	0	CIS2:DIP5:C1_03330C_A:C1_05120W_A:PRD1:KOG1:AUT7:PRC3:ATC1:CTR2:C1_08780W_A:FTH1:VPS41:NCR1:C2_02490C_A:RTA3:PRB1:TPK2:APR1:C2_08700C_A:C2_10870W_A:PMC1:AFG3:LAP41:C3_02970C_A:DAL4:FUR4:C3_04360W_A:C3_04460W_A:GAP2:C3_07850W_A:C4_00680W_A:AGP2:AMS1:C4_03700W_A:ATG1:VPH1:TFS1:VPS1:C5_01420W_A:C6_00240C_A:NHX1:CTA1:PEP3:C6_04110W_A:FMP45:YCF1:CPY1:C7_03860W_A:HSE1:HGT18:CR_06560C_A:PTC6:CR_08200C_A…	5628:407:51286:329:5759:97042:220:5887:32153:33565:5797:932:5635:31931:44459:33179:31201:31520:33573:5789:139:31160:30134:35859:5776:5768:48471:1990316:32178:5794:5938:30287:16020:5634:10494:5576:5745:324:1990816:5886:790:19898:71627:5952:5737:5777:30897:5743:9277:5802:45121:306:120095:34270:97002:5769:16021:5771:5770:421:5829:5758:328:5739:5783:30479:33101:33263:61908
324	fungal-type vacuole	56 out of 1090 genes, 5.1%	176 out of 6473 background genes, 2.7%	0.00018	0	CIS2:DIP5:C1_03330C_A:C1_05120W_A:PRD1:KOG1:AUT7:PRC3:ATC1:CTR2:C1_08780W_A:FTH1:VPS41:NCR1:C2_02490C_A:RTA3:PRB1:TPK2:APR1:C2_08700C_A:C2_10870W_A:PMC1:AFG3:LAP41:C3_02970C_A:DAL4:FUR4:C3_04360W_A:C3_04460W_A:GAP2:C3_07850W_A:C4_00680W_A:AGP2:AMS1:C4_03700W_A:ATG1:VPH1:TFS1:VPS1:C5_01420W_A:C6_00240C_A:NHX1:CTA1:PEP3:C6_04110W_A:FMP45:YCF1:CPY1:C7_03860W_A:HSE1:HGT18:CR_06560C_A:PTC6:CR_08200C_A…	5628:407:51286:329:5759:97042:220:5887:32153:33565:5797:932:5635:31931:44459:33179:31201:31520:33573:5789:139:31160:30134:35859:5776:5768:48471:1990316:32178:5794:5938:30287:16020:5634:10494:5576:5745:324:1990816:5886:790:19898:71627:5952:5737:5777:30897:5743:9277:5802:45121:306:120095:34270:97002:5769:16021:5771:5770:421:5829:5758:328:5739:5783:30479:33101:33263:61908
31224	intrinsic component of membrane	127 out of 1090 genes, 11.7%	512 out of 6473 background genes, 7.9%	0.00036	0	C1_00410C_A:PSD1:HOL4:HGT1:HGT2:EXG2:C1_03490W_A:GSL1:ANT1:C1_06980C_A:CDR4:OLE1:CTR2:C1_09210C_A:C1_09220W_A:CRP1:FTH1:URA1:TVP18:SFT2:C1_11010C_A:C1_11140W_A:FUS1:RBD1:HYR1:DAL7:NCR1:PGA52:C2_00190C_A:C2_00700W_A:C2_00940W_A:HGT8:HGT6:C2_02490C_A:FGR22:HGT20:PLC2:DFG16:SSY1:ITR1:RTA3:ARE2:C2_07440C_A:C2_07580W_A:C2_07760W_A:C2_08170W_A:C2_08700C_A:C2_08830W_A:C2_09280C_A:EAP1:C2_09680W_A:YOR1:C…	5628:9986:46658:329:1904423:32153:5887:148:71595:138:5778:31201:43332:31520:30176:33573:5789:139:30134:30445:1990415:5768:32178:31235:31305:16020:5576:5745:324:1990816:5886:1990429:19898:71627:31307:5737:5777:30173:71782:5743:9277:5802:31314:31225:45121:97002:5769:16021:5771:5770:5811:30446:9331:30061:5758:328:5739:5783:31304:5779:5788:5775:32592:31224:31166
44459	plasma membrane part	54 out of 1090 genes, 5.0%	173 out of 6473 background genes, 2.7%	0.00058	0	RIM8:HOL4:HGT1:HGT2:EXG2:GSL1:C1_06980C_A:IST2:C1_09210C_A:C1_09220W_A:FTH1:FUS1:HYR1:DAL7:PGA52:HGT8:HGT6:HGT20:ITR1:RSP5:C2_09280C_A:EAP1:HGT19:DAL5:DAL9:SAP9:DAL8:NCE102:HGT4:HGT5:GAP2:C3_07850W_A:HGT17:AGP2:C4_03110W_A:C4_03700W_A:C4_04250W_A:SAP10:MYO5:PGA4:FAT1:QDR3:C6_01400W_A:C6_03540W_A:CST5:FMP45:TPO2:CR_00420W_A:HGT18:CR_06090W_A:HGT14:SSY5:CR_09830W_A:CR_10770W_A	5628:9986:44853:46658:51286:70867:329:32153:5887:9898:151:148:31931:44459:30140:43332:31520:33573:139:5789:30134:5935:30445:5768:48471:32178:5794:5938:71944:32126:31235:16020:5634:5576:324:31234:5886:35838:5737:5622:31097:5777:31932:10008:9277:19897:5802:31225:45121:5934:16021:70250:5771:5811:30446:51285:328:5783:5739:45160:30479:33101:32541:1411:34399
31226	intrinsic component of plasma membrane	43 out of 1090 genes, 3.9%	127 out of 6473 background genes, 2.0%	0.00063	0	HOL4:HGT1:HGT2:EXG2:C1_06980C_A:C1_09210C_A:C1_09220W_A:FTH1:FUS1:HYR1:DAL7:PGA52:HGT8:HGT6:HGT20:ITR1:C2_09280C_A:EAP1:HGT19:DAL5:DAL9:SAP9:DAL8:HGT4:HGT5:GAP2:C3_07850W_A:HGT17:AGP2:C4_03700W_A:C4_04250W_A:SAP10:PGA4:FAT1:QDR3:C6_01400W_A:C6_03540W_A:TPO2:CR_00420W_A:HGT18:HGT14:CR_09830W_A:CR_10770W_A	5628:9986:46658:329:32153:5887:43332:31520:33573:5789:30134:30445:5768:32178:31235:16020:5576:5886:5777:9277:31225:16021:5771:5811:30446:328:5783:5739
16021	integral component of membrane	116 out of 1090 genes, 10.6%	480 out of 6473 background genes, 7.4%	0.00422	0	C1_00410C_A:PSD1:HOL4:HGT1:HGT2:C1_03490W_A:GSL1:ANT1:C1_06980C_A:CDR4:OLE1:CTR2:C1_09210C_A:C1_09220W_A:CRP1:FTH1:TVP18:SFT2:C1_11010C_A:C1_11140W_A:FUS1:RBD1:DAL7:NCR1:C2_00190C_A:C2_00700W_A:C2_00940W_A:HGT8:HGT6:C2_02490C_A:FGR22:HGT20:PLC2:DFG16:SSY1:ITR1:RTA3:ARE2:C2_07440C_A:C2_07580W_A:C2_07760W_A:C2_08170W_A:C2_08700C_A:C2_08830W_A:C2_09280C_A:C2_09680W_A:YOR1:C3_00210C_A:HGT19:PMC1:AFG3…	5628:329:32153:5887:148:71595:138:5778:31201:43332:31520:30176:33573:5789:139:30134:1990415:5768:32178:31305:16020:5576:5745:324:1990816:5886:1990429:71627:31307:5777:30173:71782:5743:5802:45121:97002:5769:16021:5771:5770:5811:9331:328:5739:5783:5779:5788:5775:32592:31166
44437	vacuolar part	44 out of 1090 genes, 4.0%	142 out of 6473 background genes, 2.2%	0.0065	0	DIP5:C1_03330C_A:C1_05120W_A:KOG1:AUT7:PRC3:CTR2:C1_08780W_A:FTH1:VPS41:NCR1:C2_02490C_A:C2_08700C_A:C2_10470C_A:C2_10870W_A:PMC1:AFG3:C3_04460W_A:GAP2:C3_06710W_A:C3_07850W_A:C4_00680W_A:AGP2:AMS1:C4_03700W_A:ATG1:VPH1:TFS1:VPS1:C5_01420W_A:C6_00240C_A:NHX1:ATG15:CTA1:PEP3:C6_04110W_A:YCF1:CPY1:HSE1:HGT18:PTC6:CR_08200C_A:SLP3:CR_10510W_A	5628:407:51286:329:5759:97042:220:5887:32153:33565:31931:33179:31201:31520:33573:5789:30134:35859:5776:5768:1990316:32178:16020:10494:5576:5745:324:1990816:5886:19898:71627:5737:5777:30897:5743:5802:306:120095:34270:97002:5769:5774:16021:5771:5770:421:5829:5758:328:5739:30479:33263:5775:61908:31166
5887	integral component of plasma membrane	35 out of 1090 genes, 3.2%	105 out of 6473 background genes, 1.6%	0.00832	0	HOL4:HGT1:HGT2:C1_06980C_A:C1_09210C_A:C1_09220W_A:FTH1:FUS1:DAL7:HGT8:HGT6:HGT20:ITR1:C2_09280C_A:HGT19:DAL5:DAL9:DAL8:HGT4:HGT5:GAP2:C3_07850W_A:HGT17:AGP2:C4_03700W_A:C4_04250W_A:QDR3:C6_01400W_A:C6_03540W_A:TPO2:CR_00420W_A:HGT18:HGT14:CR_09830W_A:CR_10770W_A	329:32153:5887:43332:31520:33573:5789:30134:5768:32178:16020:5886:16021:5771:328:5739
98805	whole membrane	71 out of 1090 genes, 6.5%	273 out of 6473 background genes, 4.2%	0.02007	0	C1_00410C_A:SNF7:C1_02040C_A:C1_03330C_A:C1_05120W_A:KOG1:AUT7:MDM34:ANT1:CTR2:C1_08780W_A:FTH1:VPS41:CDC48:C1_11010C_A:MDG1:NCR1:C2_00190C_A:C2_02490C_A:RSP5:C2_08700C_A:C2_10470C_A:C2_10870W_A:GLO3:C3_00850C_A:PMC1:AFG3:FUR4:C3_04460W_A:C3_04800C_A:NCE102:C3_06710W_A:C3_07850W_A:CNH1:PEX5:C4_00320C_A:C4_00680W_A:AGP2:AMS1:C4_03700W_A:ATG1:MYO5:VPH1:GUT2:TFS1:VPS1:C5_01350W_A:C5_01420W_A:VPS4:C5…	5628:9986:44853:407:51286:329:5759:1990023:97042:220:5887:32153:151:33565:30126:36266:31931:44459:33179:32865:5778:31201:43332:33573:139:5789:35859:5935:34098:5776:1990415:62040:5768:1990112:48471:1990316:5794:5938:71944:32126:16020:5634:10494:5576:5741:5745:324:5793:1990816:1990528:31234:5886:790:1990429:19898:35838:71627:815:31307:5622:5737:31097:5777:30897:31932:837:10008:71782:5743:31934:5937…
31903	microbody membrane	11 out of 1090 genes, 1.0%	20 out of 6473 background genes, 0.3%	0.03762	0.0011	ANT1:C1_11010C_A:C2_00190C_A:C3_04800C_A:PEX5:C4_00320C_A:C5_01350W_A:PXA1:PEX14:PEX19:PEX13	5778:1990415:5886:1990429:5777:71782:16021:5829:5783:5779
5778	peroxisomal membrane	11 out of 1090 genes, 1.0%	20 out of 6473 background genes, 0.3%	0.03762	0.001	ANT1:C1_11010C_A:C2_00190C_A:C3_04800C_A:PEX5:C4_00320C_A:C5_01350W_A:PXA1:PEX14:PEX19:PEX13	5778:1990415:5886:1990429:5777:71782:16021:5829:5783:5779
Downregulated gene set
Biological process
GOID	GO_term	Cluster frequency	Background frequency	Corrected P-value	False discovery rate	Gene(s) annotated to the term	Directly Annotated GOID List
42254	ribosome biogenesis	145 out of 1035 genes, 14.0%	305 out of 6473 background genes, 4.7%	4.6e-37	0	RRS1:C1_01160C_A:RPS21B:RPS21:C1_02450C_A:RPL10:RPS16A:RPS1:RPL6:ARX1:RLI1:RPP1:C1_03830C_A:C1_04710C_A:C1_04820C_A:REI1:C1_05720W_A:RPS14B:C1_06540C_A:C1_06760C_A:C1_07950C_A:C1_07960W_A:C1_09040C_A:RPS17B:C1_10880W_A:C1_11000C_A:RPL37B:KRR1:CSI2:C1_12350W_A:C1_12440W_A:C1_12680W_A:C1_12760W_A:RMP1:DIM1:C1_14080W_A:RPS26A:C2_02120W_A:C2_02710C_A:RPS9B:RPL17B:C2_04700C_A:C2_04820W_A:C2_05160C_A:R…	398:6397:34473:45944:55:70507:6913:30447:27:1902775:463:42274:42254:71038:492:1905267:30541:6401:30174:71467:294:6450:34427:43248:2000200:321:17148:71027:30847:1901917:71035:44182:1902626:16567:71033:2109:70481:973:34476:30490:465:915:30702:6611:30163:9267:44011:30488:6267:2181:6412:154:48025:42256:71042:6606:479:36177:18364:45727:42273:6407:36170:956:448:9987:16075:45943:51083:6413:70475:45893:3…
22613	ribonucleoprotein complex biogenesis	157 out of 1035 genes, 15.2%	376 out of 6473 background genes, 5.8%	7.45e-32	0	RRS1:C1_01160C_A:RPS21B:RPS21:C1_02450C_A:RPL10:RPS16A:RPS1:RPL6:ARX1:RLI1:RPP1:C1_03830C_A:C1_04120C_A:C1_04710C_A:C1_04820C_A:REI1:C1_05720W_A:RPS14B:C1_06540C_A:C1_06760C_A:C1_07950C_A:C1_07960W_A:C1_09040C_A:RPS17B:C1_10880W_A:C1_11000C_A:FGR16:RPL37B:KRR1:CSI2:C1_12350W_A:C1_12440W_A:C1_12680W_A:C1_12760W_A:RMP1:DIM1:C1_14080W_A:RPS26A:PRP39:C2_02120W_A:C2_02710C_A:RPS9B:RPL17B:C2_04700C_A:C…	398:6397:34473:9410:45944:55:70507:6913:30447:27:1902775:463:42274:395:45292:42254:71038:492:1905267:30541:6401:30174:71467:294:349:1990145:350:1731:6450:34427:43248:2000200:321:17148:71027:30847:1901917:71035:44182:389:1902626:16567:71033:2109:70481:973:34476:30490:465:915:30702:6611:30163:9267:44011:30488:6267:2181:6412:154:48025:42256:71042:6606:388:479:36177:18364:45727:42273:34247:6407:36170…
10467	gene expression	330 out of 1035 genes, 31.9%	1142 out of 6473 background genes, 17.6%	1.13e-31	0	RPL16A:tT(AGU)6:RRS1:RPB11:HMT1:C1_01150C_A:C1_01160C_A:TIF:RPS21B:TRM2:RPS21:C1_01580W_A:MRP20:C1_01860W_A:ABP140:C1_02330C_A:C1_02430C_A:RPL10:RPP1A:RPL13:RPS16A:RPS1:RPL6:C1_03180W_A:RLI1:C1_03620C_A:RPP1:C1_03830C_A:SEN15:C1_04120C_A:C1_04370C_A:C1_04820C_A:C1_05230W_A:C1_05720W_A:C1_06070W_A:RPS14B:RPS22A:C1_06470W_A:C1_06540C_A:C1_06760C_A:C1_06890C_A:C1_07280C_A:LHP1:C1_07630W_A:MRPL3:C1_0…	61818:60261:9410:6974:1410:70893:44237:6361:45944:1193:55:70507:30447:6281:463:6434:395:70525:45292:6605:6325:42766:42254:492:1903272:30174:9113:71459:45899:7114:1990145:350:100036:226:1990678:43248:71027:1900239:389:1902626:44182:35392:1903833:70785:6511:71033:1113:70481:957:34476:9299:465:6351:6366:30702:6386:30466:140018:51351:2183:34599:34414:70131:70126:30163:51604:6267:6302:17198:154:71042:…
34470	ncRNA processing	135 out of 1035 genes, 13.0%	316 out of 6473 background genes, 4.9%	4.37e-28	0	RRS1:C1_01150C_A:C1_01160C_A:RPS21B:TRM2:ABP140:RPS16A:RPS1:RPP1:C1_03830C_A:SEN15:C1_05720W_A:RPS14B:C1_06540C_A:C1_06760C_A:LHP1:C1_07950C_A:C1_07960W_A:C1_10880W_A:C1_11000C_A:C1_11160C_A:RPL37B:KRR1:CSI2:C1_12350W_A:C1_12440W_A:C1_12570C_A:RMP1:DIM1:C1_14080W_A:C2_01510C_A:C2_02120W_A:C2_02710C_A:RPS9B:RPL17B:C2_04700C_A:C2_04820W_A:RPF2:KTI11:C2_05670C_A:MAK16:C2_06480W_A:C2_06850W_A:NOC4:UT…	61818:45944:55:70507:30447:463:70525:42254:492:30174:7114:43248:71027:44182:1902626:71033:70481:34476:6351:465:30702:6386:140018:34599:34414:30163:6267:154:71042:479:18364:98787:51083:2143:34227:723:2939:44416:2926:447:43628:379:1680:42149:480:6388:467:70476:6400:31118:6396:6391:1522:34475:33621:32956:70651:6452:106004:2940:464:45903:1403:6409:1900153:6379:6357:472:398:6397:34473:27:42274:31119:4…
34660	ncRNA metabolic process	148 out of 1035 genes, 14.3%	373 out of 6473 background genes, 5.8%	7.73e-27	0	RRS1:C1_01150C_A:C1_01160C_A:RPS21B:TRM2:ABP140:RPS16A:RPS1:RPP1:C1_03830C_A:SEN15:C1_05720W_A:RPS14B:C1_06540C_A:C1_06760C_A:LHP1:C1_07950C_A:C1_07960W_A:C1_10880W_A:C1_11000C_A:C1_11160C_A:RPL37B:KRR1:CSI2:C1_12350W_A:WRS1:C1_12440W_A:C1_12570C_A:RMP1:DIM1:C1_14080W_A:C2_01510C_A:C2_02120W_A:C2_02710C_A:RPS9B:TBF1:RPL17B:C2_04700C_A:C2_04820W_A:RPF2:KTI11:C2_05670C_A:MAK16:C2_06480W_A:C2_06850W…	61818:16074:45944:55:70507:30447:463:6434:70525:42254:492:30174:7114:43248:71027:44182:1902626:71033:70481:34476:6351:465:30702:6386:140018:51351:34599:34414:30163:6267:154:71042:31936:479:98789:18364:1015:98787:51083:2143:34227:723:2939:44416:2926:447:43628:379:1680:6421:42149:480:6388:9303:467:10833:70476:6400:31118:6396:6391:6431:1522:34475:6369:33621:6422:32956:70651:6452:32211:106004:2940:46…
6364	rRNA processing	105 out of 1035 genes, 10.1%	218 out of 6473 background genes, 3.4%	1.71e-26	0	RRS1:C1_01160C_A:RPS21B:RPS16A:RPS1:RPP1:C1_03830C_A:C1_05720W_A:RPS14B:C1_06540C_A:C1_06760C_A:C1_07950C_A:C1_07960W_A:C1_10880W_A:C1_11000C_A:RPL37B:KRR1:CSI2:C1_12350W_A:C1_12440W_A:RMP1:DIM1:C1_14080W_A:C2_02120W_A:C2_02710C_A:RPS9B:RPL17B:C2_04700C_A:C2_04820W_A:RPF2:MAK16:C2_06850W_A:NOC4:UTP15:C2_08840W_A:C2_09160W_A:RRP15:RPS24:UTP8:C3_02040C_A:C3_02840W_A:C3_04380C_A:RPL35:RPL8B:YST1:C3_…	45944:55:70507:30447:463:42254:492:30174:43248:71027:44182:1902626:71033:70481:34476:465:30702:30163:6267:154:71042:479:18364:51083:44416:447:43628:42149:480:467:70476:31118:6396:6391:1522:34475:33621:32956:70651:6452:464:45903:6409:1900153:6379:472:398:6397:34473:27:42274:71038:1905267:30541:6401:294:6450:34427:321:30847:1901917:71035:16567:2109:973:30490:915:9267:30488:2181:6412:48025:42256:422…
6396	RNA processing	166 out of 1035 genes, 16.0%	451 out of 6473 background genes, 7.0%	5.65e-26	0	RRS1:C1_01150C_A:C1_01160C_A:RPS21B:TRM2:ABP140:RPS16A:RPS1:RPP1:C1_03830C_A:SEN15:C1_04120C_A:C1_05720W_A:RPS14B:C1_06540C_A:C1_06760C_A:LHP1:MRPL3:C1_07950C_A:C1_07960W_A:C1_08890C_A:BUD31:C1_10080W_A:C1_10880W_A:C1_11000C_A:FGR16:C1_11160C_A:RPL37B:KRR1:C1_11910W_A:CSI2:C1_12350W_A:C1_12440W_A:C1_12570C_A:RMP1:C1_13380W_A:DIM1:C1_14080W_A:C2_01510C_A:PRP39:C2_02120W_A:C2_02710C_A:PRP3:RPS9B:C2…	61818:9410:1410:45944:55:70507:30447:463:395:70525:45292:42254:492:30174:7114:350:43248:71027:389:1902626:44182:71033:70481:957:34476:6351:465:30702:6386:140018:34599:34414:70131:30163:6267:154:71042:388:479:36177:98789:18364:98787:51083:2143:9060:34227:723:244:2939:44416:2926:447:43628:379:1680:42149:480:6388:467:36187:70476:6400:31118:6396:6391:1522:34475:965:6369:33621:32956:70651:6452:32211:1…
16072	rRNA metabolic process	105 out of 1035 genes, 10.1%	230 out of 6473 background genes, 3.6%	4.94e-24	0	RRS1:C1_01160C_A:RPS21B:RPS16A:RPS1:RPP1:C1_03830C_A:C1_05720W_A:RPS14B:C1_06540C_A:C1_06760C_A:C1_07950C_A:C1_07960W_A:C1_10880W_A:C1_11000C_A:RPL37B:KRR1:CSI2:C1_12350W_A:C1_12440W_A:RMP1:DIM1:C1_14080W_A:C2_02120W_A:C2_02710C_A:RPS9B:RPL17B:C2_04700C_A:C2_04820W_A:RPF2:MAK16:C2_06850W_A:NOC4:UTP15:C2_08840W_A:C2_09160W_A:RRP15:RPS24:UTP8:C3_02040C_A:C3_02840W_A:C3_04380C_A:RPL35:RPL8B:YST1:C3_…	45944:55:70507:30447:463:42254:492:30174:43248:71027:44182:1902626:71033:70481:34476:465:30702:30163:6267:154:71042:479:18364:51083:44416:447:43628:42149:480:467:70476:31118:6396:6391:1522:34475:33621:32956:70651:6452:464:45903:6409:1900153:6379:472:398:6397:34473:27:42274:71038:1905267:30541:6401:294:6450:34427:321:30847:1901917:71035:16567:2109:973:30490:915:9267:30488:2181:6412:48025:42256:422…
34641	cellular nitrogen compound metabolic process	407 out of 1035 genes, 39.3%	1662 out of 6473 background genes, 25.7%	5.19e-23	0	RPL16A:tT(AGU)6:CDC13:SPE1:RRS1:RPB11:CDC5:C1_01150C_A:C1_01160C_A:DUT1:TIF:RPS21B:TRM2:RPS21:C1_01580W_A:MRP20:LSC1:C1_01860W_A:ABP140:C1_02310C_A:C1_02330C_A:C1_02430C_A:RPL10:C1_02850W_A:RPP1A:RPL13:RPS16A:RPS1:RPL6:RLI1:C1_03620C_A:RPP1:C1_03830C_A:SEN15:C1_04120C_A:C1_04370C_A:C1_04820C_A:PSF2:C1_05230W_A:C1_05720W_A:C1_05800C_A:C1_06070W_A:RPS14B:RPS22A:C1_06470W_A:C1_06540C_A:C1_06630W_A:C…	32:1902546:6261:60258:70893:6361:6596:16074:70507:31939:30447:1902775:7049:48478:463:55085:43409:7004:6227:43103:722:6325:71479:42766:42254:72530:1903272:30174:9113:45899:742:7114:1990145:350:10520:6233:1903459:76:71027:1900239:389:6312:1903833:70785:6177:71033:7127:706:6351:6386:30466:6812:140018:6267:6302:35863:71042:388:9263:36177:950:98789:70783:1015:9405:43631:33314:71963:51083:2143:9060:190…
16070	RNA metabolic process	231 out of 1035 genes, 22.3%	776 out of 6473 background genes, 12.0%	5.36e-22	0	RRS1:RPB11:C1_01150C_A:C1_01160C_A:RPS21B:TRM2:C1_01860W_A:ABP140:C1_02850W_A:RPS16A:RPS1:RPP1:C1_03830C_A:SEN15:C1_04120C_A:C1_05230W_A:C1_05720W_A:RPS14B:C1_06540C_A:C1_06760C_A:C1_07280C_A:LHP1:MRPL3:C1_07950C_A:C1_07960W_A:C1_08160W_A:C1_08890C_A:BUD31:C1_10080W_A:RPA34:C1_10880W_A:C1_11000C_A:FGR16:C1_11160C_A:RPL37B:KRR1:C1_11910W_A:CSI2:C1_12350W_A:WRS1:C1_12440W_A:C1_12570C_A:C1_12820C_A:…	70893:6361:16074:70507:30447:1902775:463:722:6325:42766:42254:30174:9113:45899:7114:350:71027:1900239:389:70785:71033:6351:30466:6386:140018:6267:6302:71042:388:36177:98789:70783:1015:9405:43631:71963:51083:2143:9060:723:244:2939:44416:6337:2000815:2926:10691:6286:447:43628:6348:379:6421:6303:480:6388:6260:9303:36187:70476:61427:6391:6431:734:1522:965:6369:46084:33621:31440:2940:1900153:43044:480…
90304	nucleic acid metabolic process	275 out of 1035 genes, 26.6%	1038 out of 6473 background genes, 16.0%	2.14e-18	0	CDC13:RRS1:RPB11:CDC5:C1_01150C_A:C1_01160C_A:RPS21B:TRM2:C1_01860W_A:ABP140:C1_02310C_A:C1_02850W_A:RPS16A:RPS1:RPP1:C1_03830C_A:SEN15:C1_04120C_A:PSF2:C1_05230W_A:C1_05720W_A:C1_05800C_A:RPS14B:C1_06540C_A:C1_06630W_A:C1_06760C_A:C1_07280C_A:C1_07490C_A:LHP1:MRPL3:C1_07950C_A:C1_07960W_A:C1_08160W_A:C1_08890C_A:C1_09670C_A:BUD31:C1_10080W_A:RPA34:APN2:C1_10880W_A:C1_11000C_A:FGR16:C1_11160C_A:R…	32:1902546:6261:60258:70893:6361:16074:70507:31939:30447:1902775:7049:48478:463:43409:7004:722:6325:71479:42766:42254:30174:9113:45899:7114:350:10520:1903459:76:71027:1900239:389:6312:70785:71033:7127:706:6351:6386:30466:140018:6267:6302:71042:388:36177:98789:70783:1015:9405:43631:33314:71963:51083:2143:9060:1903353:51568:723:244:2000220:2939:44416:6337:2000815:2926:10691:35066:6286:447:43628:634…
43170	macromolecule metabolic process	470 out of 1035 genes, 45.4%	2109 out of 6473 background genes, 32.6%	6.48e-18	0	RPL16A:tT(AGU)6:CDC13:C1_00810W_A:RRS1:RPB11:CDC5:HMT1:C1_01150C_A:C1_01160C_A:DUT1:TIF:RPS21B:TRM2:RPS21:C1_01580W_A:MRP20:C1_01860W_A:SHA3:ABP140:C1_02310C_A:C1_02330C_A:C1_02430C_A:RPL10:C1_02850W_A:RPP1A:RPL13:RPS16A:RPS1:RPL6:C1_03180W_A:RLI1:C1_03620C_A:RPP1:ELA1:C1_03830C_A:SEN15:C1_04120C_A:BST1:SSA2:C1_04370C_A:C1_04820C_A:SAP7:RHD1:PSF2:C1_05230W_A:C1_05720W_A:C1_05800C_A:CHS7:C1_06070W…	32:1902546:6261:32889:60258:45324:70893:1903338:6361:16074:70507:31939:30447:1932:1902775:7049:48478:463:43409:7004:6458:722:6325:71479:42766:42254:18027:16255:1903272:30174:9113:45899:742:7114:1990145:350:8361:10520:226:31497:1903459:60583:76:71027:51229:1900239:389:35719:34975:6312:1903833:70785:71033:32995:71470:6505:7127:706:1900190:6351:2001042:42026:6386:30466:140018:7266:6267:34517:6302:90…
6139	nucleobase-containing compound metabolic process	302 out of 1035 genes, 29.2%	1205 out of 6473 background genes, 18.6%	1.31e-16	0	CDC13:RRS1:RPB11:CDC5:C1_01150C_A:C1_01160C_A:DUT1:RPS21B:TRM2:LSC1:C1_01860W_A:ABP140:C1_02310C_A:C1_02850W_A:RPS16A:RPS1:RPP1:C1_03830C_A:SEN15:C1_04120C_A:PSF2:C1_05230W_A:C1_05720W_A:C1_05800C_A:RPS14B:C1_06540C_A:C1_06630W_A:C1_06760C_A:C1_07280C_A:C1_07490C_A:LHP1:ATP7:MRPL3:C1_07950C_A:C1_07960W_A:C1_08160W_A:SAM4:C1_08890C_A:ERG12:C1_09670C_A:BUD31:C1_10080W_A:RPA34:APN2:C1_10880W_A:C1_11…	32:1902546:6261:60258:70893:6361:16074:70507:31939:30447:1902775:7049:48478:463:55085:43409:7004:6227:43103:722:6325:71479:42766:42254:72530:30174:9113:45899:742:7114:350:10520:6233:1903459:76:71027:1900239:389:6312:70785:6177:71033:7127:706:6351:6386:30466:6812:140018:6267:6302:35863:71042:388:9263:36177:98789:70783:1015:9405:43631:33314:71963:51083:2143:9060:1903353:51568:723:244:2000220:2939:4…
44085	cellular component biogenesis	239 out of 1035 genes, 23.1%	908 out of 6473 background genes, 14.0%	6.82e-15	0	TUB2:RRS1:CDC5:C1_01160C_A:RPS21B:RPS21:ABP140:SEP7:C1_02290C_A:C1_02310C_A:C1_02450C_A:RPL10:C1_02500W_A:TOM20:RPS16A:RPS1:RPL6:ARX1:RLI1:C1_03790C_A:RPP1:C1_03830C_A:C1_04120C_A:C1_04180W_A:BST1:C1_04710C_A:C1_04820C_A:REI1:C1_05660C_A:C1_05720W_A:GIM5:CHS7:RPS14B:C1_06540C_A:C1_06640C_A:C1_06760C_A:C1_07630W_A:C1_07850C_A:C1_07950C_A:C1_07960W_A:DPM1:C1_09040C_A:C1_09620C_A:RPS17B:C1_10880W_A:…	32:60258:70507:31939:30447:1932:1902775:7049:48478:463:55085:48311:6458:722:6325:71479:42766:42254:55088:30174:742:7107:6657:34497:1990145:350:31497:71027:7019:35719:389:917:6033:6312:71033:71470:6505:7023:61163:34551:42026:30466:6812:6267:90529:1903477:6616:71042:388:51598:51301:36177:70783:6276:9405:45176:33314:71963:51083:9060:43935:1903353:723:244:51223:2000220:44416:6337:10691:70584:35066:44…
6725	cellular aromatic compound metabolic process	310 out of 1035 genes, 30.0%	1285 out of 6473 background genes, 19.9%	1.97e-14	0	CDC13:RRS1:RPB11:CDC5:C1_01150C_A:C1_01160C_A:DUT1:RPS21B:TRM2:LSC1:C1_01860W_A:ABP140:C1_02310C_A:C1_02850W_A:RPS16A:RPS1:RPP1:C1_03830C_A:SEN15:C1_04120C_A:PSF2:C1_05230W_A:C1_05720W_A:C1_05800C_A:RPS14B:C1_06540C_A:C1_06630W_A:C1_06760C_A:C1_07280C_A:C1_07490C_A:LHP1:ATP7:MRPL3:C1_07950C_A:C1_07960W_A:C1_08160W_A:SAM4:C1_08890C_A:ERG12:C1_09670C_A:BUD31:C1_10080W_A:RPA34:APN2:C1_10880W_A:C1_11…	32:1902546:6261:60258:70893:6361:16074:70507:31939:30447:1902775:7049:48478:463:55085:43409:7004:6227:43103:722:6325:71479:42766:42254:72530:30174:9113:45899:742:7114:350:10520:6233:1903459:76:71027:1900239:389:6312:70785:6177:71033:7127:706:6351:6386:30466:6812:140018:6267:6302:35863:71042:388:9263:36177:950:98789:70783:1015:9405:43631:33314:71963:51083:2143:9060:1903353:51568:723:244:2000220:29…
46483	heterocycle metabolic process	311 out of 1035 genes, 30.0%	1298 out of 6473 background genes, 20.1%	5.14e-14	0	CDC13:RRS1:RPB11:CDC5:C1_01150C_A:C1_01160C_A:DUT1:RPS21B:TRM2:LSC1:C1_01860W_A:ABP140:C1_02310C_A:C1_02850W_A:RPS16A:RPS1:C1_03180W_A:RPP1:C1_03830C_A:SEN15:C1_04120C_A:PSF2:C1_05230W_A:C1_05720W_A:C1_05800C_A:RPS14B:C1_06540C_A:C1_06630W_A:C1_06760C_A:C1_07280C_A:C1_07490C_A:LHP1:ATP7:MRPL3:C1_07950C_A:C1_07960W_A:C1_08160W_A:SAM4:C1_08890C_A:ERG12:C1_09670C_A:BUD31:C1_10080W_A:RPA34:APN2:C1_10…	32:1902546:6261:70485:60258:70893:6361:16074:70507:31939:30447:1902775:7049:48478:463:55085:43409:7004:6227:43103:722:6325:71479:42766:42254:72530:30174:9113:45899:742:7114:350:10520:6233:1903459:76:71027:1900239:389:6312:70785:6177:71033:7127:706:6351:6386:30466:6812:140018:6267:6302:35863:71042:388:9263:36177:950:98789:70783:1015:9405:43631:33314:71963:51083:2143:9060:1903353:51568:723:244:2000…
6807	nitrogen compound metabolic process	515 out of 1035 genes, 49.8%	2462 out of 6473 background genes, 38.0%	6.7e-14	0	RPL16A:tT(AGU)6:CDC13:SPE1:C1_00810W_A:RRS1:RPB11:CDC5:HMT1:C1_01150C_A:C1_01160C_A:DUT1:TIF:RPS21B:TRM2:RPS21:C1_01580W_A:MRP20:LSC1:C1_01860W_A:CYS4:SHA3:ABP140:C1_02310C_A:C1_02330C_A:C1_02430C_A:RPL10:HOM6:C1_02850W_A:RPP1A:RPL13:RPS16A:RPS1:RPL6:C1_03180W_A:RLI1:C1_03620C_A:RPP1:ELA1:C1_03830C_A:SEN15:C1_04120C_A:BST1:SSA2:C1_04370C_A:C1_04820C_A:SAP7:RHD1:ARG2:PSF2:C1_05230W_A:C1_05720W_A:C…	32:1902546:6261:60258:45324:70893:1903338:6361:6596:6535:16074:70507:31939:30447:1932:1902775:7049:48478:463:55085:43409:7004:6227:43103:6458:19343:722:6325:19280:71479:42766:42254:72530:18027:16255:1903272:30174:9113:45899:742:7114:6657:1990145:350:10520:6233:226:6673:31497:1903459:76:71027:51229:1900239:389:35719:34975:6312:1903833:70785:6177:71033:71470:6505:7127:706:1900190:6351:2001042:42026…
6412	translation	130 out of 1035 genes, 12.6%	404 out of 6473 background genes, 6.2%	9e-14	0	RPL16A:tT(AGU)6:TIF:RPS21B:RPS21:C1_01580W_A:MRP20:C1_02330C_A:C1_02430C_A:RPL10:RPP1A:RPL13:RPS16A:RPS1:RPL6:RLI1:C1_03620C_A:C1_04370C_A:C1_04820C_A:C1_05720W_A:C1_06070W_A:RPS14B:RPS22A:C1_06470W_A:C1_06890C_A:RPL42:C1_10470W_A:RPS17B:RPL29:RPL37B:MRPS9:WRS1:RPL27A:RPL14:RPL38:C2_01030W_A:RPS26A:C2_02270C_A:RPL21A:RPS9B:C2_03950W_A:RPL39:GCD7:RPL17B:C2_04700C_A:C2_04790C_A:MRPL10:ERF1:C2_05410…	30447:463:42254:1903272:1990145:1903833:51083:9060:44416:447:2182:6421:6431:1900153:43936:27:70124:8612:1731:16567:32543:9267:2181:45727:42273:6407:36170:462:45905:469:42255:16973:28:6446:2184:6436:461:45860:6418:44237:45944:6434:44182:51351:2183:34599:70126:30163:479:6353:42149:32232:6414:6422:6452:45903:6415:32790:70184:42274:6450:2109:30490:6432:6412:48025:448:16236:70183:6413:6449:71216:56:54…
1901360	organic cyclic compound metabolic process	320 out of 1035 genes, 30.9%	1353 out of 6473 background genes, 20.9%	1.13e-13	0	CDC13:ERG2:RRS1:RPB11:CDC5:C1_01150C_A:C1_01160C_A:DUT1:RPS21B:TRM2:LSC1:C1_01860W_A:ABP140:C1_02310C_A:C1_02850W_A:RPS16A:RPS1:C1_03180W_A:RPP1:C1_03830C_A:SEN15:C1_04120C_A:ERG3:PSF2:C1_05230W_A:C1_05720W_A:C1_05800C_A:RPS14B:C1_06540C_A:C1_06630W_A:C1_06760C_A:C1_07280C_A:C1_07490C_A:LHP1:ATP7:MRPL3:C1_07950C_A:C1_07960W_A:C1_08160W_A:SAM4:C1_08890C_A:ERG12:C1_09670C_A:BUD31:C1_10080W_A:RPA34:…	32:1902546:6261:70485:60258:70893:6361:16074:70507:31939:30447:1902775:7049:48478:463:55085:43409:7004:6227:43103:722:6325:71479:42766:42254:72530:30174:9113:45899:742:7114:350:10520:6233:1903459:76:71027:1900239:389:6312:70785:6177:71033:7127:706:6351:6386:30466:6812:140018:6267:6302:35863:71042:388:9263:36177:950:98789:70783:1015:9405:43631:33314:71963:51083:2143:9060:1903353:51568:723:244:2000…
43043	peptide biosynthetic process	130 out of 1035 genes, 12.6%	408 out of 6473 background genes, 6.3%	2.22e-13	0	RPL16A:tT(AGU)6:TIF:RPS21B:RPS21:C1_01580W_A:MRP20:C1_02330C_A:C1_02430C_A:RPL10:RPP1A:RPL13:RPS16A:RPS1:RPL6:RLI1:C1_03620C_A:C1_04370C_A:C1_04820C_A:C1_05720W_A:C1_06070W_A:RPS14B:RPS22A:C1_06470W_A:C1_06890C_A:RPL42:C1_10470W_A:RPS17B:RPL29:RPL37B:MRPS9:WRS1:RPL27A:RPL14:RPL38:C2_01030W_A:RPS26A:C2_02270C_A:RPL21A:RPS9B:C2_03950W_A:RPL39:GCD7:RPL17B:C2_04700C_A:C2_04790C_A:MRPL10:ERF1:C2_05410…	30447:463:42254:1903272:1990145:1903833:51083:9060:44416:447:2182:6421:6431:1900153:43936:27:70124:8612:1731:16567:32543:9267:2181:45727:42273:6407:36170:462:45905:469:42255:16973:28:6446:2184:6436:461:45860:6418:44237:45944:6434:44182:51351:2183:34599:70126:30163:479:6353:42149:32232:6414:6422:6452:45903:6415:32790:70184:42274:6450:2109:30490:6432:6412:48025:448:16236:70183:6413:6449:71216:56:54…
42274	ribosomal small subunit biogenesis	55 out of 1035 genes, 5.3%	118 out of 6473 background genes, 1.8%	5.81e-12	0	RRS1:RPS21B:RPS16A:RPS1:RPP1:RPS14B:RPS17B:C1_10880W_A:KRR1:DIM1:C1_14080W_A:C2_02710C_A:RPS9B:C2_04700C_A:C2_06850W_A:NOC4:UTP15:C2_08840W_A:RPS24:UTP8:C3_02040C_A:C3_02840W_A:C3_04380C_A:RPS19A:YST1:C3_07800C_A:RPS6A:NAN1:UBI3:FYV5:C5_01540W_A:UTP13:C5_03400C_A:C5_03920C_A:C5_04840C_A:C5_04910W_A:NOP5:RPS13:C6_01040C_A:RPS28B:RPS18:C7_01030C_A:ENP1:LSM6:CR_00460C_A:CR_01710W_A:CR_03360W_A:CR_07…	30447:42254:71027:447:480:70476:1900153:1905267:294:16567:9267:2181:42273:6407:36170:956:45943:8298:462:469:42255:16973:28:34965:461:55:43248:154:479:18364:6396:45903:6409:472:398:42274:321:2109:30490:30488:6412:71216:56:470:36180:8033:6364:35690
43604	amide biosynthetic process	135 out of 1035 genes, 13.0%	456 out of 6473 background genes, 7.0%	4.22e-11	0	RPL16A:tT(AGU)6:SPE1:TIF:RPS21B:RPS21:C1_01580W_A:MRP20:C1_02330C_A:C1_02430C_A:RPL10:RPP1A:RPL13:RPS16A:RPS1:RPL6:RLI1:C1_03620C_A:C1_04370C_A:C1_04820C_A:C1_05720W_A:C1_06070W_A:RPS14B:RPS22A:C1_06470W_A:C1_06890C_A:RPL42:C1_10470W_A:RPS17B:RPL29:RPL37B:MRPS9:WRS1:RPL27A:RPL14:RPL38:C2_01030W_A:RPS26A:C2_02270C_A:RPL21A:RPS9B:C2_03950W_A:RPL39:GCD7:RPL17B:C2_04700C_A:C2_04790C_A:MRPL10:ERF1:C2_…	6596:30447:463:42254:1903272:1990145:1903833:51083:9060:44416:447:2182:6421:6431:7009:1900153:46513:43936:27:70124:8612:8152:1731:16567:32543:9267:2181:45727:42273:6407:36170:462:45905:9446:469:42255:16973:28:6446:2184:6436:1302:461:45860:6418:44237:45944:6434:8295:6090:44182:51351:2183:34599:70126:30163:479:6353:42149:6086:32232:6414:6422:6452:45903:6415:32790:70184:42274:6450:2109:30490:6432:64…
6518	peptide metabolic process	130 out of 1035 genes, 12.6%	434 out of 6473 background genes, 6.7%	5.13e-11	0	RPL16A:tT(AGU)6:TIF:RPS21B:RPS21:C1_01580W_A:MRP20:C1_02330C_A:C1_02430C_A:RPL10:RPP1A:RPL13:RPS16A:RPS1:RPL6:RLI1:C1_03620C_A:C1_04370C_A:C1_04820C_A:C1_05720W_A:C1_06070W_A:RPS14B:RPS22A:C1_06470W_A:C1_06890C_A:RPL42:C1_10470W_A:RPS17B:RPL29:RPL37B:MRPS9:WRS1:RPL27A:RPL14:RPL38:C2_01030W_A:RPS26A:C2_02270C_A:RPL21A:RPS9B:C2_03950W_A:RPL39:GCD7:RPL17B:C2_04700C_A:C2_04790C_A:MRPL10:ERF1:C2_05410…	30447:463:42254:1903272:1990145:1903833:51083:9060:44416:447:2182:6421:6431:1900153:43936:27:70124:8612:1731:16567:32543:9267:2181:45727:42273:6407:36170:462:45905:469:42255:16973:28:6446:2184:6436:461:45860:6418:44237:45944:6434:44182:51351:2183:34599:70126:30163:479:6353:42149:32232:6414:6422:6452:45903:6415:32790:70184:42274:6450:2109:30490:6432:6412:48025:448:16236:70183:6413:6449:71216:56:54…
34645	cellular macromolecule biosynthetic process	226 out of 1035 genes, 21.8%	910 out of 6473 background genes, 14.1%	1.05e-10	0	RPL16A:tT(AGU)6:C1_00810W_A:RPB11:DUT1:TIF:RPS21B:RPS21:C1_01580W_A:MRP20:C1_01860W_A:C1_02310C_A:C1_02330C_A:C1_02430C_A:RPL10:RPP1A:RPL13:RPS16A:RPS1:RPL6:RLI1:C1_03620C_A:C1_04370C_A:C1_04820C_A:PSF2:C1_05230W_A:C1_05720W_A:C1_05800C_A:C1_06070W_A:RPS14B:RPS22A:C1_06470W_A:C1_06630W_A:C1_06760C_A:C1_06890C_A:C1_07280C_A:GPI8:C1_07490C_A:VRG4:DPM1:C1_08160W_A:C1_09670C_A:RPA34:RPL42:C1_10470W_A…	32:6261:32889:60258:70893:6361:31939:30447:7049:48478:463:43409:7004:722:6325:71479:42766:42254:16255:1903272:30174:9113:45899:742:1990145:8361:1903459:60583:76:71027:1900239:6312:1903833:70785:71033:32995:6505:6351:30466:6386:7266:6267:6302:35863:6616:70610:36177:98789:70783:1015:6276:9405:33314:71963:51083:9060:723:44416:2000769:6337:10691:6286:447:43628:6348:2182:6421:46777:6303:9303:6260:7098…
44238	primary metabolic process	532 out of 1035 genes, 51.4%	2654 out of 6473 background genes, 41.0%	2.08e-10	0	RPL16A:tT(AGU)6:CDC13:ERG2:C1_00810W_A:RRS1:RPB11:CDC5:HMT1:C1_01150C_A:C1_01160C_A:DUT1:TIF:RPS21B:TRM2:RPS21:C1_01580W_A:MRP20:LSC1:C1_01860W_A:CYS4:SHA3:ABP140:C1_02310C_A:C1_02330C_A:C1_02430C_A:RPL10:HOM6:C1_02850W_A:RPP1A:RPL13:RPS16A:RPS1:RPL6:C1_03180W_A:RLI1:C1_03620C_A:RPP1:ELA1:C1_03830C_A:SEN15:C1_04120C_A:BST1:SSA2:C1_04370C_A:ERG3:C1_04820C_A:SAP7:RHD1:ARG2:PSF2:C1_05230W_A:C1_05720…	32:1902546:6261:32889:60258:45324:70893:1903338:6361:6535:16074:70507:31939:30447:1932:1902775:7049:31589:48478:463:55085:43409:7004:6227:6116:43103:6458:19343:722:6325:19280:71479:42766:42254:72530:18027:16255:1903272:30174:9113:45899:742:7114:6657:1990145:30968:350:8361:10520:6233:226:6673:31497:1903459:60583:76:71027:51229:1900239:389:35719:34975:6312:6003:1903833:70785:6177:71033:32995:71470:…
9059	macromolecule biosynthetic process	228 out of 1035 genes, 22.0%	926 out of 6473 background genes, 14.3%	2.16e-10	0	RPL16A:tT(AGU)6:C1_00810W_A:RPB11:DUT1:TIF:RPS21B:RPS21:C1_01580W_A:MRP20:C1_01860W_A:C1_02310C_A:C1_02330C_A:C1_02430C_A:RPL10:RPP1A:RPL13:RPS16A:RPS1:RPL6:RLI1:C1_03620C_A:C1_04370C_A:C1_04820C_A:PSF2:C1_05230W_A:C1_05720W_A:C1_05800C_A:CHS7:C1_06070W_A:RPS14B:RPS22A:C1_06470W_A:C1_06630W_A:C1_06760C_A:C1_06890C_A:C1_07280C_A:GPI8:C1_07490C_A:VRG4:DPM1:C1_08160W_A:C1_09670C_A:RPA34:RPL42:C1_104…	32:6261:32889:60258:70893:6361:31939:30447:7049:48478:463:43409:7004:722:6325:71479:42766:42254:16255:1903272:30174:9113:45899:742:1990145:8361:1903459:60583:76:71027:1900239:6312:1903833:70785:71033:32995:6505:6351:30466:6386:7266:6267:6302:90529:35863:6616:70610:36177:98789:70783:1015:6276:9405:33314:71963:51083:9060:723:51223:44416:2000769:6337:10691:6286:447:43628:6348:2182:6421:46777:6303:93…
30490	maturation of SSU-rRNA	48 out of 1035 genes, 4.6%	102 out of 6473 background genes, 1.6%	2.23e-10	0	RRS1:RPS21B:RPS16A:RPS1:RPP1:RPS14B:C1_10880W_A:KRR1:DIM1:C1_14080W_A:RPS9B:C2_04700C_A:C2_06850W_A:NOC4:UTP15:C2_08840W_A:RPS24:UTP8:C3_02040C_A:C3_02840W_A:C3_04380C_A:YST1:C3_07800C_A:RPS6A:NAN1:UBI3:FYV5:C5_01540W_A:UTP13:C5_03400C_A:C5_03920C_A:C5_04840C_A:C5_04910W_A:NOP5:RPS13:C6_01040C_A:RPS28B:RPS18:C7_01030C_A:ENP1:LSM6:CR_03360W_A:CR_07030C_A:RPS27:RPS20:CR_09740W_A:UTP5:CR_10410C_A	30447:42254:71027:447:480:70476:1900153:1905267:294:16567:9267:2181:42273:6407:36170:956:45943:8298:462:469:42255:16973:28:34965:461:55:43248:154:479:18364:6396:45903:6409:472:398:42274:321:2109:30490:30488:6412:71216:56:470:36180:8033:6364:35690
42255	ribosome assembly	31 out of 1035 genes, 3.0%	50 out of 6473 background genes, 0.8%	3.65e-10	0	RRS1:RPL10:RPL6:C1_04710C_A:RPS14B:C1_06760C_A:C1_09040C_A:RPS17B:CSI2:C1_12440W_A:RPS26A:C2_02710C_A:RPF2:RPL11:RPL12:C3_02670W_A:YST1:C4_02880C_A:C4_05230C_A:C4_05330C_A:UBI3:C5_01540W_A:RPL25:NIP7:C6_02380W_A:RPS28B:RPL5:CR_03940W_A:CR_07080W_A:RPS27:DRS1	70507:30447:1902775:463:42254:30174:6267:447:1900153:27:16567:9267:2181:42273:6407:36170:462:469:42255:28:461:42038:55:492:1902626:465:30702:479:32956:16070:464:45903:6415:42274:2109:30490:6412:42256:71216:56:54:36180:466:6364:35690
44237	cellular metabolic process	558 out of 1035 genes, 53.9%	2841 out of 6473 background genes, 43.9%	1.96e-09	0	RPL16A:tT(AGU)6:CDC13:SPE1:ERG2:C1_00810W_A:RRS1:RPB11:CDC5:HMT1:C1_01150C_A:C1_01160C_A:DUT1:TIF:RPS21B:TRM2:RPS21:C1_01580W_A:MRP20:LSC1:C1_01860W_A:CYS4:SHA3:ABP140:C1_02310C_A:C1_02330C_A:C1_02430C_A:RPL10:HOM6:C1_02850W_A:RPP1A:RPL13:RPS16A:RPS1:RPL6:C1_03180W_A:RLI1:C1_03620C_A:RPP1:ELA1:C1_03830C_A:SEN15:C1_03940W_A:C1_04120C_A:BST1:SSA2:C1_04370C_A:ERG3:C1_04820C_A:RHD1:ARG2:PSF2:C1_05230…	16237:32:1902546:6261:32889:70485:60258:45324:70893:1903338:6361:6596:6535:16074:70507:31939:30447:1932:1902775:7049:48478:463:55085:43409:7004:6227:6116:43103:6458:19343:722:6325:19280:71479:42766:42254:72530:18027:16255:1903272:30174:9113:45899:742:7114:6657:34497:1990145:30968:350:8361:10520:6233:226:6673:31497:1903459:60583:76:71027:51229:1900239:389:35719:34975:6312:6003:1903833:70785:6177:7…
462	maturation of SSU-rRNA from tricistronic rRNA transcript (SSU-rRNA, 5.8S rRNA, LSU-rRNA)	43 out of 1035 genes, 4.2%	91 out of 6473 background genes, 1.4%	3.65e-09	0	RRS1:RPS21B:RPS16A:RPS1:RPP1:RPS14B:C1_10880W_A:KRR1:DIM1:C1_14080W_A:RPS9B:C2_04700C_A:C2_06850W_A:NOC4:UTP15:RPS24:UTP8:C3_02040C_A:C3_02840W_A:C3_04380C_A:YST1:C3_07800C_A:RPS6A:NAN1:FYV5:C5_01540W_A:UTP13:C5_03920C_A:C5_04840C_A:C5_04910W_A:NOP5:RPS13:C6_01040C_A:RPS18:C7_01030C_A:ENP1:CR_03360W_A:CR_07030C_A:RPS27:RPS20:CR_09740W_A:UTP5:CR_10410C_A	30447:42254:71027:447:480:1905267:294:9267:2181:42273:6407:36170:45943:8298:462:469:42255:16973:28:34965:461:55:43248:154:479:6396:45903:6409:472:398:42274:321:6412:71216:56:36180:8033:6364:35690
42273	ribosomal large subunit biogenesis	43 out of 1035 genes, 4.2%	93 out of 6473 background genes, 1.4%	9.21e-09	0	RRS1:RPL10:RPL6:RLI1:C1_04710C_A:REI1:C1_05720W_A:C1_06760C_A:C1_09040C_A:RPL37B:CSI2:C1_12440W_A:RPL17B:C2_05160C_A:RPF2:MAK16:RPL11:C2_08840W_A:RRP15:C2_09660W_A:C3_02040C_A:RPL12:C3_02670W_A:RPL35:RPL8B:NOG1:RLP24:HIT1:C4_05230C_A:C4_05330C_A:CIC1:C6_01890C_A:RPL25:NIP7:C6_02380W_A:MRT4:C7_00160C_A:NOP15:RPL5:CR_03940W_A:RPL7:CR_07080W_A:DRS1	70507:30447:1902775:463:42254:30174:6267:447:480:70476:6913:27:17148:9267:2181:45727:42273:36170:956:8298:42255:278:42038:55:492:1902626:465:30702:30163:18364:32956:16070:464:45903:6415:32790:472:42274:30490:915:30488:6412:42256:448:6413:71216:54:470:36180:466:7117:6364:35690
44271	cellular nitrogen compound biosynthetic process	213 out of 1035 genes, 20.6%	883 out of 6473 background genes, 13.6%	1.64e-08	0	RPL16A:tT(AGU)6:SPE1:RPB11:DUT1:TIF:RPS21B:RPS21:C1_01580W_A:MRP20:C1_01860W_A:C1_02330C_A:C1_02430C_A:RPL10:RPP1A:RPL13:RPS16A:RPS1:RPL6:RLI1:C1_03620C_A:C1_04370C_A:C1_04820C_A:C1_05230W_A:C1_05720W_A:C1_06070W_A:RPS14B:RPS22A:C1_06470W_A:C1_06890C_A:C1_07280C_A:ATP7:C1_08160W_A:RPA34:RPL42:C1_10470W_A:RPS17B:RPL29:RPL37B:C1_11790W_A:C1_11910W_A:TRP3:MRPS9:C1_12350W_A:WRS1:RPL27A:ATP20:C1_12820…	32:70893:6361:6596:30447:463:55085:43409:7004:6227:43103:722:6325:71479:42766:42254:72530:1903272:30174:9113:45899:1990145:6233:1903459:71027:1900239:6312:1903833:70785:6177:71033:6351:30466:6386:6812:6302:35863:9263:98789:70783:1015:9405:71963:51083:9060:723:44416:6337:10691:6286:17144:447:43628:6348:6863:2182:9143:6421:6303:9303:6260:70987:70935:61427:6391:6431:734:6369:46084:9168:33621:45184:7…
71704	organic substance metabolic process	551 out of 1035 genes, 53.2%	2828 out of 6473 background genes, 43.7%	2.02e-08	0	RPL16A:tT(AGU)6:CDC13:SPE1:ERG2:C1_00810W_A:RRS1:RPB11:CDC5:HMT1:C1_01150C_A:C1_01160C_A:DUT1:TIF:RPS21B:TRM2:RPS21:C1_01580W_A:MRP20:LSC1:C1_01860W_A:CYS4:SHA3:ABP140:C1_02310C_A:C1_02330C_A:C1_02430C_A:RPL10:HOM6:C1_02850W_A:RPP1A:RPL13:RPS16A:RPS1:RPL6:C1_03180W_A:RLI1:C1_03620C_A:RPP1:ELA1:C1_03830C_A:SEN15:C1_04120C_A:BST1:SSA2:C1_04370C_A:ERG3:C1_04820C_A:SAP7:RHD1:ARG2:PSF2:C1_05230W_A:C1_…	32:1902546:6261:32889:70485:60258:45324:70893:1903338:6361:6596:6535:16074:70507:31939:30447:1932:1902775:7049:31589:48478:463:55085:43409:7004:6227:6116:43103:6458:19343:722:6325:19280:71479:42766:42254:72530:18027:16255:1903272:30174:9113:45899:742:7114:6657:1990145:30968:350:8361:10520:6233:226:6673:31497:1903459:60583:76:71027:51229:1900239:389:35719:34975:6662:6312:6003:1903833:70785:6177:71…
469	cleavage involved in rRNA processing	37 out of 1035 genes, 3.6%	76 out of 6473 background genes, 1.2%	4.31e-08	0	RRS1:C1_01160C_A:RPS21B:RPP1:C1_03830C_A:C1_06540C_A:C1_07960W_A:C1_10880W_A:RPL37B:KRR1:CSI2:C1_12350W_A:C1_14080W_A:RPL17B:NOC4:C2_09160W_A:C3_02040C_A:C3_02840W_A:YST1:C3_07800C_A:C4_02090C_A:RRP42:UTP13:C5_03920C_A:C5_04840C_A:NOP5:RPS28B:RPS18:ENP1:CR_02550C_A:CR_03360W_A:NHP2:RPL7:CR_07030C_A:RPS27:NOP10:CR_10410C_A	30447:463:42254:71027:71033:71042:447:43628:480:1522:33621:1900153:27:71038:1905267:6401:294:30847:9267:2181:42273:6407:36170:45943:16075:8298:71028:70478:71039:462:71051:469:42255:28:16973:34965:461:55:43248:70481:34476:465:479:467:31118:6396:34475:70651:464:472:34473:42274:34427:1901917:71035:973:30490:6412:448:71216:31120:56:36180:71031:8033:6364:35690
43603	cellular amide metabolic process	138 out of 1035 genes, 13.3%	511 out of 6473 background genes, 7.9%	4.62e-08	0	RPL16A:tT(AGU)6:SPE1:TIF:RPS21B:RPS21:C1_01580W_A:MRP20:LSC1:C1_02330C_A:C1_02430C_A:RPL10:RPP1A:RPL13:RPS16A:RPS1:RPL6:RLI1:C1_03620C_A:C1_04370C_A:C1_04820C_A:C1_05720W_A:C1_06070W_A:RPS14B:RPS22A:C1_06470W_A:C1_06890C_A:ERG12:RPL42:C1_10470W_A:RPS17B:RPL29:RPL37B:MRPS9:WRS1:RPL27A:RPL14:RPL38:C2_01030W_A:RPS26A:C2_02270C_A:RPL21A:RPS9B:C2_03950W_A:RPL39:GCD7:RPL17B:C2_04700C_A:C2_04790C_A:MRPL…	6596:30447:463:42254:1903272:1990145:1903833:51083:9060:44416:447:2182:6421:6431:7009:1900153:46513:43936:27:6084:70124:8612:8152:1731:16567:32543:9267:2181:45727:42273:6407:36170:10142:462:8299:45905:9446:469:42255:16973:28:6446:2184:6436:1302:461:45860:6418:44237:45944:6434:8295:6090:44182:51351:2183:34599:70126:30163:479:6353:42149:6086:32232:6414:6422:6452:45903:6415:32790:70184:42274:6450:21…
6403	RNA localization	52 out of 1035 genes, 5.0%	130 out of 6473 background genes, 2.0%	5.23e-08	0	RRS1:HMT1:RPS21:C1_02450C_A:TOM20:ARX1:RLI1:C1_03830C_A:C1_04120C_A:SSA2:C1_06540C_A:C1_07960W_A:NUP188:C1_11910W_A:C1_12350W_A:C1_12760W_A:RPS26A:C2_05220C_A:C2_06850W_A:RPS10:UTP8:C3_01520C_A:C3_02040C_A:NUP85:RPS15:RPS19A:YST1:NOG1:BFR1:ZUO1:ECM1:C4_05230C_A:C4_06880C_A:NAM7:RPS5:MRT4:SHE3:C6_03380W_A:NOG2:RPS28B:RPS18:ENP1:KAP120:C7_04200C_A:YRB1:CEX1:MEX67:YDJ1:RPS3:CR_07080W_A:SSB1:ELF1	30447:463:43409:7004:6458:42254:30174:226:71027:35719:71033:71470:42026:30466:6267:6302:6616:71042:36177:51083:723:44416:2000815:447:43628:480:16031:70935:30150:6457:33621:1900153:7533:51726:51701:15833:6913:27:71038:6401:349:71528:60567:2000200:30847:43161:16567:82:9267:2181:18195:6283:6606:45727:42273:6407:36170:956:72742:45943:16075:8298:71028:70478:71039:462:71051:70924:469:6406:18216:42255:2…
90501	RNA phosphodiester bond hydrolysis	43 out of 1035 genes, 4.2%	97 out of 6473 background genes, 1.5%	5.24e-08	0	RRS1:C1_01160C_A:RPS21B:RPP1:C1_03830C_A:C1_06540C_A:LHP1:C1_07960W_A:C1_10880W_A:RPL37B:KRR1:CSI2:C1_12350W_A:C1_14080W_A:RPL17B:NOC4:C2_09160W_A:RPC11:C3_02040C_A:C3_02840W_A:YST1:C3_07800C_A:C4_01650C_A:C4_02090C_A:SEN2:RRP42:UTP13:C5_03920C_A:C5_04840C_A:NOP5:POP4:RPS28B:RPS18:ENP1:CR_02550C_A:SSU72:CR_03360W_A:NHP2:RPL7:CR_07030C_A:RPS27:NOP10:CR_10410C_A	30447:463:42254:71027:71033:6351:6386:71042:98789:447:43628:379:480:6388:1522:6369:33621:1900153:27:42797:71038:1905267:6401:294:30847:16567:42779:32215:9267:2181:42273:6407:36170:6378:45943:16075:8298:71028:70478:71039:462:71051:1174:469:42255:28:16973:34965:461:42493:61818:55:43248:70481:34476:465:34414:479:98787:467:31118:6396:34475:70651:32211:464:31124:6379:472:6397:34473:42274:34427:1901917…
460	maturation of 5.8S rRNA	39 out of 1035 genes, 3.8%	84 out of 6473 background genes, 1.3%	7.85e-08	0	RRS1:C1_01160C_A:RPS21B:RPP1:C1_03830C_A:C1_06540C_A:C1_07960W_A:C1_10880W_A:RPL37B:KRR1:CSI2:C1_12350W_A:RMP1:C1_14080W_A:RPL17B:RPF2:MAK16:NOC4:C2_09160W_A:RRP15:C3_02040C_A:C3_02840W_A:YST1:C3_07800C_A:C4_02090C_A:RRP42:C4_05330C_A:UTP13:C5_03920C_A:C5_04840C_A:NOP5:CIC1:RPS18:ENP1:CR_02550C_A:CR_03360W_A:RPL7:CR_07080W_A:CR_10410C_A	70507:30447:463:42254:71027:71033:71042:447:43628:480:33621:27:71038:1905267:6401:294:30847:9267:2181:42273:6407:36170:45943:16075:8298:71028:70478:71039:462:71051:42255:28:16973:34965:461:55:43248:1902626:70481:34476:465:30163:467:6396:34475:32956:70651:464:472:34473:42274:34427:1901917:71035:973:6412:42256:448:71216:54:36180:466:71031:8033:6364:35690
466	maturation of 5.8S rRNA from tricistronic rRNA transcript (SSU-rRNA, 5.8S rRNA, LSU-rRNA)	39 out of 1035 genes, 3.8%	84 out of 6473 background genes, 1.3%	7.85e-08	0	RRS1:C1_01160C_A:RPS21B:RPP1:C1_03830C_A:C1_06540C_A:C1_07960W_A:C1_10880W_A:RPL37B:KRR1:CSI2:C1_12350W_A:RMP1:C1_14080W_A:RPL17B:RPF2:MAK16:NOC4:C2_09160W_A:RRP15:C3_02040C_A:C3_02840W_A:YST1:C3_07800C_A:C4_02090C_A:RRP42:C4_05330C_A:UTP13:C5_03920C_A:C5_04840C_A:NOP5:CIC1:RPS18:ENP1:CR_02550C_A:CR_03360W_A:RPL7:CR_07080W_A:CR_10410C_A	70507:30447:463:42254:71027:71033:71042:447:43628:480:33621:27:71038:1905267:6401:294:30847:9267:2181:42273:6407:36170:45943:16075:8298:71028:70478:71039:462:71051:42255:28:16973:34965:461:55:43248:1902626:70481:34476:465:30163:467:6396:34475:32956:70651:464:472:34473:42274:34427:1901917:71035:973:6412:42256:448:71216:54:36180:466:71031:8033:6364:35690
50658	RNA transport	47 out of 1035 genes, 4.5%	114 out of 6473 background genes, 1.8%	1.38e-07	0	RRS1:HMT1:RPS21:C1_02450C_A:TOM20:ARX1:RLI1:C1_03830C_A:C1_04120C_A:SSA2:C1_06540C_A:NUP188:C1_11910W_A:C1_12350W_A:C1_12760W_A:RPS26A:C2_05220C_A:C2_06850W_A:RPS10:UTP8:C3_01520C_A:C3_02040C_A:NUP85:RPS15:RPS19A:YST1:NOG1:ZUO1:ECM1:C4_05230C_A:C4_06880C_A:RPS5:MRT4:NOG2:RPS28B:RPS18:ENP1:KAP120:C7_04200C_A:YRB1:CEX1:MEX67:YDJ1:RPS3:CR_07080W_A:SSB1:ELF1	30447:463:6458:42254:30174:226:71027:35719:71033:71470:42026:30466:6267:6302:6616:71042:36177:51083:44416:447:43628:480:16031:30150:6457:33621:1900153:51726:51701:15833:6913:27:71038:6401:349:71528:60567:2000200:30847:43161:82:9267:2181:18195:6283:6606:45727:42273:6407:36170:956:72742:45943:16075:8298:71028:71039:462:70924:469:6406:18216:42255:28:16973:10389:245:461:45944:55:6605:6405:43248:44182…
51236	establishment of RNA localization	47 out of 1035 genes, 4.5%	114 out of 6473 background genes, 1.8%	1.38e-07	0	RRS1:HMT1:RPS21:C1_02450C_A:TOM20:ARX1:RLI1:C1_03830C_A:C1_04120C_A:SSA2:C1_06540C_A:NUP188:C1_11910W_A:C1_12350W_A:C1_12760W_A:RPS26A:C2_05220C_A:C2_06850W_A:RPS10:UTP8:C3_01520C_A:C3_02040C_A:NUP85:RPS15:RPS19A:YST1:NOG1:ZUO1:ECM1:C4_05230C_A:C4_06880C_A:RPS5:MRT4:NOG2:RPS28B:RPS18:ENP1:KAP120:C7_04200C_A:YRB1:CEX1:MEX67:YDJ1:RPS3:CR_07080W_A:SSB1:ELF1	30447:463:6458:42254:30174:226:71027:35719:71033:71470:42026:30466:6267:6302:6616:71042:36177:51083:44416:447:43628:480:16031:30150:6457:33621:1900153:51726:51701:15833:6913:27:71038:6401:349:71528:60567:2000200:30847:43161:82:9267:2181:18195:6283:6606:45727:42273:6407:36170:956:72742:45943:16075:8298:71028:71039:462:70924:469:6406:18216:42255:28:16973:10389:245:461:45944:55:6605:6405:43248:44182…
50657	nucleic acid transport	47 out of 1035 genes, 4.5%	115 out of 6473 background genes, 1.8%	1.99e-07	0	RRS1:HMT1:RPS21:C1_02450C_A:TOM20:ARX1:RLI1:C1_03830C_A:C1_04120C_A:SSA2:C1_06540C_A:NUP188:C1_11910W_A:C1_12350W_A:C1_12760W_A:RPS26A:C2_05220C_A:C2_06850W_A:RPS10:UTP8:C3_01520C_A:C3_02040C_A:NUP85:RPS15:RPS19A:YST1:NOG1:ZUO1:ECM1:C4_05230C_A:C4_06880C_A:RPS5:MRT4:NOG2:RPS28B:RPS18:ENP1:KAP120:C7_04200C_A:YRB1:CEX1:MEX67:YDJ1:RPS3:CR_07080W_A:SSB1:ELF1	30447:463:6458:42254:30174:226:71027:35719:71033:71470:42026:30466:6267:6302:6616:71042:36177:51083:44416:447:43628:480:16031:30150:6457:33621:1900153:51726:51701:15833:6913:27:71038:6401:349:71528:60567:2000200:30847:43161:82:9267:2181:18195:6283:6606:45727:42273:6407:36170:956:72742:45943:16075:8298:71028:71039:462:70924:469:6406:18216:42255:28:16973:10389:245:461:45944:55:6605:6405:43248:44182…
9058	biosynthetic process	308 out of 1035 genes, 29.8%	1426 out of 6473 background genes, 22.0%	2.41e-07	0	RPL16A:tT(AGU)6:SPE1:ERG2:C1_00810W_A:RPB11:C1_01150C_A:DUT1:TIF:RPS21B:RPS21:C1_01580W_A:MRP20:C1_01860W_A:CYS4:C1_02310C_A:C1_02330C_A:C1_02430C_A:RPL10:HOM6:RPP1A:RPL13:RPS16A:RPS1:RPL6:C1_03180W_A:RLI1:C1_03620C_A:C1_04370C_A:ERG3:C1_04820C_A:RHD1:ARG2:PSF2:C1_05230W_A:C1_05720W_A:C1_05800C_A:CHS7:ACP1:C1_06070W_A:RPS14B:RPS22A:C1_06470W_A:C1_06630W_A:C1_06760C_A:C1_06890C_A:C1_07280C_A:GPI8:…	32:6261:32889:70485:60258:70893:6361:6596:6535:31939:30447:7049:48478:463:55085:43409:7004:6227:6116:43103:19343:722:6325:19280:71479:42766:42254:72530:16255:1903272:30174:9113:45899:742:6657:1990145:30968:8361:6233:6673:226:1903459:60583:76:71027:1900239:6312:1903833:70785:6177:71033:32995:6505:6351:30466:6386:6812:7266:6267:6302:90529:35863:6616:70610:9263:36177:950:98789:70783:10919:71072:1015…
51168	nuclear export	45 out of 1035 genes, 4.3%	109 out of 6473 background genes, 1.7%	3.35e-07	0	RRS1:HMT1:RPS21:C1_02450C_A:ARX1:RLI1:C1_03830C_A:C1_04120C_A:C1_06540C_A:C1_07690C_A:NUP188:C1_11910W_A:C1_12350W_A:C1_12760W_A:RPS26A:C2_05220C_A:C2_06850W_A:RPS10:UTP8:C3_01520C_A:C3_02040C_A:NUP85:RPS15:RPS19A:YST1:NOG1:ZUO1:ECM1:C4_05230C_A:C4_06880C_A:RPS5:MRT4:NOG2:RPS28B:RPS18:ENP1:KAP120:C7_04200C_A:YRB1:CEX1:MEX67:RPS3:CR_07080W_A:SSB1:ELF1	30447:463:42254:30174:226:71027:71033:30466:6267:6302:71042:36177:51083:44416:447:43628:480:33621:1900153:51726:6913:27:71038:6401:349:71528:60567:2000200:30847:43161:82:9267:2181:18195:6283:6606:45727:42273:6407:36170:956:72742:45943:16075:8298:71028:71039:462:469:6406:18216:42255:28:16973:10389:245:461:45944:55:6405:43248:44182:1902626:35392:6511:70481:30702:6611:34398:35753:42149:467:6999:7065…
44249	cellular biosynthetic process	298 out of 1035 genes, 28.8%	1374 out of 6473 background genes, 21.2%	3.47e-07	0	RPL16A:tT(AGU)6:SPE1:ERG2:C1_00810W_A:RPB11:DUT1:TIF:RPS21B:RPS21:C1_01580W_A:MRP20:C1_01860W_A:CYS4:C1_02310C_A:C1_02330C_A:C1_02430C_A:RPL10:HOM6:RPP1A:RPL13:RPS16A:RPS1:RPL6:C1_03180W_A:RLI1:C1_03620C_A:C1_04370C_A:ERG3:C1_04820C_A:RHD1:ARG2:PSF2:C1_05230W_A:C1_05720W_A:C1_05800C_A:ACP1:C1_06070W_A:RPS14B:RPS22A:C1_06470W_A:C1_06630W_A:C1_06760C_A:C1_06890C_A:C1_07280C_A:GPI8:C1_07490C_A:ATP7:…	32:6261:32889:70485:60258:70893:6361:6596:6535:31939:30447:7049:48478:463:55085:43409:7004:6227:6116:43103:19343:722:6325:19280:71479:42766:42254:72530:16255:1903272:30174:9113:45899:742:6657:1990145:30968:8361:6233:6673:1903459:60583:76:71027:1900239:6312:1903833:70785:6177:71033:32995:6505:6351:30466:6386:6812:7266:6267:6302:35863:6616:70610:9263:36177:950:98789:70783:71072:1015:6276:9405:33314…
51169	nuclear transport	57 out of 1035 genes, 5.5%	156 out of 6473 background genes, 2.4%	4.03e-07	0	RRS1:HMT1:RPS21:C1_02450C_A:YPT7:TEM1:ARX1:RLI1:C1_03830C_A:C1_04120C_A:SSA2:REI1:C1_05630C_A:C1_06540C_A:C1_07690C_A:NUP188:NTF2:C1_11910W_A:C1_12350W_A:C1_12760W_A:RPS26A:RHO3:C2_05220C_A:C2_06850W_A:RPS10:UTP8:C3_01520C_A:C3_02040C_A:NUP85:RPS15:RPS19A:YST1:NOG1:NMD5:ZUO1:ECM1:C4_05230C_A:C4_06880C_A:RPS5:MRT4:NOG2:RPS28B:RPS18:C7_02460C_A:ENP1:KAP120:C7_04200C_A:YRB1:CEX1:RHO1:MEX67:YDJ1:RPS3…	32889:30447:463:6458:42254:30174:34497:8361:226:60583:71027:35719:71033:71470:32995:42026:30466:7266:6267:6302:6616:71042:70610:36177:90338:71963:51083:31578:2000220:44416:2000769:447:43628:480:87:60237:60178:6457:32880:33621:6810:301:1900153:7064:51726:51701:31536:15833:27:6913:71038:6401:349:1903471:71528:30010:60567:1905758:2000200:30847:10590:43161:82:9267:2181:18195:6283:6606:10458:45727:422…
6913	nucleocytoplasmic transport	57 out of 1035 genes, 5.5%	156 out of 6473 background genes, 2.4%	4.03e-07	0	RRS1:HMT1:RPS21:C1_02450C_A:YPT7:TEM1:ARX1:RLI1:C1_03830C_A:C1_04120C_A:SSA2:REI1:C1_05630C_A:C1_06540C_A:C1_07690C_A:NUP188:NTF2:C1_11910W_A:C1_12350W_A:C1_12760W_A:RPS26A:RHO3:C2_05220C_A:C2_06850W_A:RPS10:UTP8:C3_01520C_A:C3_02040C_A:NUP85:RPS15:RPS19A:YST1:NOG1:NMD5:ZUO1:ECM1:C4_05230C_A:C4_06880C_A:RPS5:MRT4:NOG2:RPS28B:RPS18:C7_02460C_A:ENP1:KAP120:C7_04200C_A:YRB1:CEX1:RHO1:MEX67:YDJ1:RPS3…	32889:30447:463:6458:42254:30174:34497:8361:226:60583:71027:35719:71033:71470:32995:42026:30466:7266:6267:6302:6616:71042:70610:36177:90338:71963:51083:31578:2000220:44416:2000769:447:43628:480:87:60237:60178:6457:32880:33621:6810:301:1900153:7064:51726:51701:31536:15833:27:6913:71038:6401:349:1903471:71528:30010:60567:1905758:2000200:30847:10590:43161:82:9267:2181:18195:6283:6606:10458:45727:422…
44260	cellular macromolecule metabolic process	355 out of 1035 genes, 34.3%	1707 out of 6473 background genes, 26.4%	7.67e-07	0	RPL16A:tT(AGU)6:CDC13:C1_00810W_A:RPB11:CDC5:HMT1:C1_01150C_A:C1_01160C_A:DUT1:TIF:RPS21B:RPS21:C1_01580W_A:MRP20:C1_01860W_A:SHA3:ABP140:C1_02310C_A:C1_02330C_A:C1_02430C_A:RPL10:C1_02850W_A:RPP1A:RPL13:RPS16A:RPS1:RPL6:C1_03180W_A:RLI1:C1_03620C_A:RPP1:ELA1:C1_03830C_A:BST1:SSA2:C1_04370C_A:C1_04820C_A:RHD1:PSF2:C1_05230W_A:C1_05720W_A:C1_05800C_A:C1_06070W_A:MSI3:RPS14B:RPS22A:C1_06470W_A:C1_0…	32:1902546:6261:32889:60258:45324:70893:1903338:6361:31939:30447:1932:7049:48478:463:43409:7004:6458:722:6325:71479:42766:42254:18027:16255:1903272:30174:9113:45899:742:7114:1990145:8361:10520:226:31497:1903459:60583:76:71027:51229:1900239:35719:34975:6312:1903833:70785:71033:32995:71470:6505:7127:706:1900190:6351:2001042:42026:6386:30466:7266:6267:34517:6302:35863:17198:6616:10570:71042:70610:36…
6405	RNA export from nucleus	44 out of 1035 genes, 4.3%	108 out of 6473 background genes, 1.7%	8.96e-07	0	RRS1:HMT1:RPS21:C1_02450C_A:ARX1:RLI1:C1_03830C_A:C1_04120C_A:C1_06540C_A:NUP188:C1_11910W_A:C1_12350W_A:C1_12760W_A:RPS26A:C2_05220C_A:C2_06850W_A:RPS10:UTP8:C3_01520C_A:C3_02040C_A:NUP85:RPS15:RPS19A:YST1:NOG1:ZUO1:ECM1:C4_05230C_A:C4_06880C_A:RPS5:MRT4:NOG2:RPS28B:RPS18:ENP1:KAP120:C7_04200C_A:YRB1:CEX1:MEX67:RPS3:CR_07080W_A:SSB1:ELF1	30447:463:42254:30174:226:71027:71033:30466:6267:6302:71042:36177:51083:44416:447:43628:480:33621:1900153:51726:6913:27:71038:6401:349:71528:60567:2000200:30847:43161:82:9267:2181:18195:6283:6606:45727:42273:6407:36170:956:72742:45943:16075:8298:71028:71039:462:469:6406:18216:42255:28:16973:10389:245:461:45944:55:6405:43248:44182:1902626:35392:6511:70481:30702:6611:34398:35753:42149:467:6999:7065…
6611	protein export from nucleus	44 out of 1035 genes, 4.3%	108 out of 6473 background genes, 1.7%	8.96e-07	0	RRS1:HMT1:RPS21:C1_02450C_A:ARX1:RLI1:C1_03830C_A:C1_04120C_A:C1_06540C_A:C1_07690C_A:NUP188:C1_11910W_A:C1_12350W_A:C1_12760W_A:RPS26A:C2_05220C_A:C2_06850W_A:RPS10:UTP8:C3_01520C_A:C3_02040C_A:NUP85:RPS15:RPS19A:YST1:NOG1:ZUO1:ECM1:C4_05230C_A:C4_06880C_A:RPS5:MRT4:NOG2:RPS28B:RPS18:ENP1:KAP120:C7_04200C_A:CEX1:MEX67:RPS3:CR_07080W_A:SSB1:ELF1	30447:463:42254:30174:71027:71033:30466:6267:6302:71042:36177:51083:44416:447:43628:480:33621:1900153:51726:27:71038:6401:349:71528:60567:2000200:30847:43161:9267:2181:18195:6283:6606:45727:42273:6407:36170:956:72742:45943:16075:8298:71028:71039:462:469:6406:18216:42255:28:16973:10389:245:461:45944:55:43248:44182:1902626:35392:6511:70481:30702:6611:34398:35753:42149:467:6999:70651:6452:122:45903:…
42797	tRNA transcription by RNA polymerase III	15 out of 1035 genes, 1.4%	18 out of 6473 background genes, 0.3%	1e-06	0	C1_01860W_A:C1_05230W_A:C1_12820C_A:RPC40:RPC11:RPC53:C4_03040W_A:RPO26:C5_04990W_A:C6_03210C_A:C7_01210C_A:RPC19:RPC31:CR_02890C_A:RPB8	70893:45899:6351:6386:31440:6362:6352:42797:6383:42779:42493:1193:6366:6384:6360:6368:6355:31564:32968:6367
9304	tRNA transcription	15 out of 1035 genes, 1.4%	18 out of 6473 background genes, 0.3%	1e-06	0	C1_01860W_A:C1_05230W_A:C1_12820C_A:RPC40:RPC11:RPC53:C4_03040W_A:RPO26:C5_04990W_A:C6_03210C_A:C7_01210C_A:RPC19:RPC31:CR_02890C_A:RPB8	70893:45899:6351:6386:31440:6362:6352:42797:6383:42779:42493:1193:6366:6384:6360:6368:6355:31564:32968:6367
1901576	organic substance biosynthetic process	297 out of 1035 genes, 28.7%	1385 out of 6473 background genes, 21.4%	1.5e-06	0	RPL16A:tT(AGU)6:SPE1:ERG2:C1_00810W_A:RPB11:C1_01150C_A:DUT1:TIF:RPS21B:RPS21:C1_01580W_A:MRP20:C1_01860W_A:CYS4:C1_02310C_A:C1_02330C_A:C1_02430C_A:RPL10:HOM6:RPP1A:RPL13:RPS16A:RPS1:RPL6:C1_03180W_A:RLI1:C1_03620C_A:C1_04370C_A:ERG3:C1_04820C_A:RHD1:ARG2:PSF2:C1_05230W_A:C1_05720W_A:C1_05800C_A:CHS7:ACP1:C1_06070W_A:RPS14B:RPS22A:C1_06470W_A:C1_06630W_A:C1_06760C_A:C1_06890C_A:C1_07280C_A:GPI8:…	32:6261:32889:70485:60258:70893:6361:6596:6535:31939:30447:7049:48478:463:55085:43409:7004:6227:6116:43103:19343:722:6325:19280:71479:42766:42254:72530:16255:1903272:30174:9113:45899:742:6657:1990145:30968:8361:6233:6673:1903459:60583:76:71027:1900239:6312:1903833:70785:6177:71033:32995:6505:6351:30466:6386:6812:7266:6267:6302:90529:35863:6616:70610:9263:36177:950:98789:70783:10919:71072:1015:627…
71166	ribonucleoprotein complex localization	43 out of 1035 genes, 4.2%	107 out of 6473 background genes, 1.7%	2.36e-06	0	RRS1:HMT1:RPS21:C1_02450C_A:ARX1:RLI1:C1_03830C_A:C1_04120C_A:C1_06540C_A:NUP188:C1_11910W_A:C1_12350W_A:C1_12760W_A:RPS26A:C2_05220C_A:C2_06850W_A:RPS10:UTP8:C3_01520C_A:C3_02040C_A:NUP85:RPS15:RPS19A:YST1:NOG1:ZUO1:ECM1:C4_05230C_A:C4_06880C_A:RPS5:MRT4:NOG2:RPS28B:RPS18:ENP1:KAP120:C7_04200C_A:CEX1:MEX67:RPS3:CR_07080W_A:SSB1:ELF1	30447:463:42254:30174:71027:71033:30466:6267:6302:71042:36177:51083:44416:447:43628:480:33621:1900153:51726:27:71038:6401:349:71528:60567:2000200:30847:43161:9267:2181:18195:6283:6606:45727:42273:6407:36170:956:72742:45943:16075:8298:71028:71039:462:469:6406:18216:42255:28:16973:10389:245:461:45944:55:43248:44182:1902626:35392:6511:70481:30702:6611:34398:35753:42149:467:6999:70651:6452:122:45903:…
71426	ribonucleoprotein complex export from nucleus	43 out of 1035 genes, 4.2%	107 out of 6473 background genes, 1.7%	2.36e-06	0	RRS1:HMT1:RPS21:C1_02450C_A:ARX1:RLI1:C1_03830C_A:C1_04120C_A:C1_06540C_A:NUP188:C1_11910W_A:C1_12350W_A:C1_12760W_A:RPS26A:C2_05220C_A:C2_06850W_A:RPS10:UTP8:C3_01520C_A:C3_02040C_A:NUP85:RPS15:RPS19A:YST1:NOG1:ZUO1:ECM1:C4_05230C_A:C4_06880C_A:RPS5:MRT4:NOG2:RPS28B:RPS18:ENP1:KAP120:C7_04200C_A:CEX1:MEX67:RPS3:CR_07080W_A:SSB1:ELF1	30447:463:42254:30174:71027:71033:30466:6267:6302:71042:36177:51083:44416:447:43628:480:33621:1900153:51726:27:71038:6401:349:71528:60567:2000200:30847:43161:9267:2181:18195:6283:6606:45727:42273:6407:36170:956:72742:45943:16075:8298:71028:71039:462:469:6406:18216:42255:28:16973:10389:245:461:45944:55:43248:44182:1902626:35392:6511:70481:30702:6611:34398:35753:42149:467:6999:70651:6452:122:45903:…
6399	tRNA metabolic process	53 out of 1035 genes, 5.1%	150 out of 6473 background genes, 2.3%	7.04e-06	0	C1_01150C_A:C1_01160C_A:TRM2:ABP140:RPP1:C1_03830C_A:SEN15:C1_06540C_A:LHP1:C1_11160C_A:C1_12350W_A:WRS1:C1_12570C_A:C2_01510C_A:KTI11:C2_05670C_A:C2_06480W_A:C2_08840W_A:C2_09160W_A:C2_09310C_A:C2_09500W_A:SMM1:RPC11:SES1:C3_02840W_A:TRM12:C4_00740W_A:C4_00880W_A:C4_00940W_A:C4_01500W_A:C4_02090C_A:SEN2:C4_03140C_A:RRP42:C4_04810C_A:C5_01610W_A:MSW1:MES1:C6_01050W_A:POP4:C7_00330C_A:THG1:C7_0234…	7114:71027:6351:6386:140018:71042:2143:723:2939:2926:447:43628:379:6421:6388:70476:6431:1522:33621:2940:6357:42797:71038:1905267:6401:70681:294:17183:30847:51017:42779:42273:16075:32447:71028:70478:71039:55114:71051:16973:2098:6436:34965:6418:61818:6434:70525:70481:34476:51351:34599:34414:18364:98787:34227:1680:467:6400:6396:34475:6422:70651:106004:1403:6379:34473:70184:42274:31119:6450:34427:710…
31503	protein-containing complex localization	49 out of 1035 genes, 4.7%	135 out of 6473 background genes, 2.1%	9.95e-06	0	RRS1:HMT1:RPS21:C1_02450C_A:ARX1:RLI1:C1_03830C_A:C1_04120C_A:C1_06540C_A:NUP188:C1_09840C_A:C1_11910W_A:C1_12350W_A:C1_12760W_A:RPS26A:C2_05220C_A:CDC7:C2_06850W_A:RPS10:UTP8:C3_01520C_A:C3_02040C_A:NUP85:RPS15:RPS19A:YST1:NOG1:ZUO1:ECM1:C4_05230C_A:C4_06880C_A:RPS5:CDC14:RAD18:MRT4:NOG2:C7_00450C_A:RPS28B:RPS18:ENP1:KAP120:C7_04200C_A:CEX1:MEX67:RPS3:CR_06520C_A:CR_07080W_A:SSB1:ELF1	60258:30447:463:48478:42254:30174:34497:71027:51229:6312:71033:71470:30466:6267:6302:71042:36177:33314:51083:44416:447:43628:44878:35853:46777:480:70987:34501:1904968:1902846:31031:33621:301:1900153:10620:6357:51726:31536:6913:27:2000786:71038:6401:349:71528:60567:2000200:30847:43161:6301:1990920:7059:82:44154:9267:2181:18195:6283:6606:31334:45727:42273:6407:36170:956:72742:1902977:45943:16075:92…
71428	rRNA-containing ribonucleoprotein complex export from nucleus	27 out of 1035 genes, 2.6%	54 out of 6473 background genes, 0.8%	1.07e-05	0	RRS1:RPS21:C1_02450C_A:ARX1:RLI1:C1_12760W_A:RPS26A:C2_06850W_A:RPS10:C3_02040C_A:NUP85:RPS15:RPS19A:YST1:NOG1:ZUO1:ECM1:C4_05230C_A:RPS5:MRT4:NOG2:RPS28B:RPS18:MEX67:RPS3:CR_07080W_A:SSB1	30447:463:42254:30174:6267:36177:51083:44416:447:480:1900153:27:2000200:2181:6606:45727:42273:6407:956:8298:462:469:6406:42255:16973:28:461:55:44182:1902626:30702:6611:42149:6452:45903:6415:32790:472:42274:71467:6450:30490:44011:6412:42256:9987:6413:45893:56:54:466:31081:6364:35690
71840	cellular component organization or biogenesis	350 out of 1035 genes, 33.8%	1713 out of 6473 background genes, 26.5%	1.15e-05	0	CDC13:TUB2:RRS1:CDC5:C1_01160C_A:RPS21B:RPS21:ABP140:SEP7:C1_02290C_A:C1_02310C_A:TIM21:C1_02450C_A:RPL10:C1_02500W_A:C1_02510W_A:TOM20:RPS16A:TEM1:RPS1:RPL6:ECM33:ARX1:RLI1:C1_03790C_A:RPP1:C1_03830C_A:C1_04120C_A:C1_04180W_A:BST1:C1_04710C_A:C1_04820C_A:REI1:C1_05660C_A:C1_05720W_A:PGA26:GIM5:CHS7:RPS14B:C1_06540C_A:C1_06630W_A:C1_06640C_A:C1_06760C_A:C1_07490C_A:C1_07630W_A:C1_07850C_A:C1_0795…	32:32581:6261:32889:60258:1903338:70507:31939:30447:1932:1902775:7049:31589:48478:463:55085:43409:7004:6116:48311:6458:722:6325:71479:42766:42254:55088:18027:8608:30174:9113:742:7107:6657:34497:1990145:350:8361:10520:226:31497:1903459:60583:76:71027:51229:7019:1900239:35719:389:917:51987:6033:6312:7155:70785:71033:32995:71470:6505:7023:61163:7127:706:1900190:34551:2001042:42026:30466:6812:7266:62…
90305	nucleic acid phosphodiester bond hydrolysis	44 out of 1035 genes, 4.3%	117 out of 6473 background genes, 1.8%	1.74e-05	0	RRS1:C1_01160C_A:RPS21B:RPP1:C1_03830C_A:C1_06540C_A:LHP1:C1_07960W_A:C1_10880W_A:RPL37B:KRR1:CSI2:C1_12350W_A:C1_14080W_A:RPL17B:NOC4:C2_09160W_A:RPC11:C3_02040C_A:C3_02840W_A:YST1:C3_07800C_A:C4_01650C_A:C4_02090C_A:SEN2:RRP42:UTP13:C5_03920C_A:C5_04840C_A:NOP5:POP4:RPS28B:RPS18:ENP1:CR_01550C_A:CR_02550C_A:SSU72:CR_03360W_A:NHP2:RPL7:CR_07030C_A:RPS27:NOP10:CR_10410C_A	30447:463:42254:71027:71033:6351:6386:71042:98789:447:43628:379:480:6388:1522:6369:33621:1900153:27:42797:71038:1905267:6401:294:30847:16567:42779:6309:32215:9267:2181:42273:6407:36170:6378:45943:16075:8298:71028:70478:71039:462:71051:1174:469:42255:28:16973:34965:461:42493:61818:55:43248:70481:34476:465:34599:34414:479:98787:467:31118:6396:34475:70651:32211:464:31124:6379:472:6397:34473:42274:34…
27	ribosomal large subunit assembly	18 out of 1035 genes, 1.7%	29 out of 6473 background genes, 0.4%	4.57e-05	0	RPL10:RPL6:C1_04710C_A:C1_06760C_A:C1_09040C_A:CSI2:C1_12440W_A:RPF2:RPL11:RPL12:C3_02670W_A:C4_05230C_A:C4_05330C_A:RPL25:C6_02380W_A:RPL5:CR_03940W_A:DRS1	70507:30447:1902775:463:42254:30174:6267:27:9267:2181:42273:36170:42038:492:1902626:465:30702:32956:16070:464:45903:6415:6412:71216:54:36180:466:6364:35690
1901566	organonitrogen compound biosynthetic process	192 out of 1035 genes, 18.6%	846 out of 6473 background genes, 13.1%	5.06e-05	0	RPL16A:tT(AGU)6:SPE1:C1_00810W_A:C1_01150C_A:DUT1:TIF:RPS21B:RPS21:C1_01580W_A:MRP20:CYS4:C1_02310C_A:C1_02330C_A:C1_02430C_A:RPL10:HOM6:RPP1A:RPL13:RPS16A:RPS1:RPL6:RLI1:C1_03620C_A:C1_04370C_A:C1_04820C_A:RHD1:ARG2:C1_05720W_A:CHS7:C1_06070W_A:RPS14B:RPS22A:C1_06470W_A:C1_06890C_A:GPI8:ATP7:VRG4:DPM1:SAM4:RPL42:C1_10470W_A:RPS17B:RPL29:C1_11100W_A:RPL37B:ARO7:C1_11790W_A:TRP3:MRPS9:WRS1:RPL27A:…	32:6596:6535:30447:463:55085:6227:43103:19343:722:19280:42254:16255:1903272:9113:6657:1990145:6233:6673:1903833:6177:6505:6812:90529:35863:9263:6276:9405:51083:9060:723:51223:44416:447:2182:6688:6421:9303:6260:36187:6031:30437:61427:6457:6431:44249:6534:46084:9168:50667:7009:6166:1900153:46513:43936:9116:36178:27:6754:19346:46417:6486:6163:70124:8612:19379:1990570:8152:1731:48194:36244:7059:16567…
15931	nucleobase-containing compound transport	52 out of 1035 genes, 5.0%	155 out of 6473 background genes, 2.4%	7.38e-05	0	RRS1:HMT1:RPS21:C1_02450C_A:TOM20:ARX1:RLI1:C1_03830C_A:C1_04120C_A:SSA2:C1_06540C_A:VRG4:NUP188:C1_11910W_A:C1_12350W_A:C1_12760W_A:RPS26A:C2_05220C_A:CNT:C2_06850W_A:RPS10:FCY21:UTP8:C3_01520C_A:C3_02040C_A:NUP85:RPS15:RPS19A:YST1:NOG1:HUT1:ZUO1:ECM1:C4_05230C_A:C4_06880C_A:RPS5:C5_04580C_A:MRT4:NOG2:RPS28B:RPS18:ENP1:KAP120:C7_04200C_A:YRB1:CEX1:MEX67:YDJ1:RPS3:CR_07080W_A:SSB1:ELF1	45324:30447:463:55085:6458:42254:72530:30174:226:71027:35719:71033:71470:42026:30466:6267:6302:6616:71042:36177:51083:44416:447:43628:6863:480:16031:30150:6457:33621:1900153:51726:51701:15833:6913:27:6486:71038:6401:349:1990570:71528:60567:2000200:30847:43161:82:9267:2181:18195:6283:6606:45727:42273:6407:36170:956:72742:45943:16075:8655:30448:8298:71028:71039:462:43328:15861:72334:6487:15858:7092…
22618	ribonucleoprotein complex assembly	46 out of 1035 genes, 4.4%	132 out of 6473 background genes, 2.0%	0.00012	0	RRS1:RPL10:RPL6:C1_04120C_A:C1_04710C_A:RPS14B:C1_06760C_A:C1_09040C_A:RPS17B:FGR16:CSI2:C1_12440W_A:RPS26A:PRP39:C2_02710C_A:RPF2:C2_06790W_A:RPL11:RPL12:C3_02670W_A:C3_04230W_A:YST1:NOG1:RLP24:HIT1:C4_02880C_A:C4_05230C_A:C4_05330C_A:UBI3:C5_01540W_A:GCD11:SUI1:RPL25:NIP7:C6_02380W_A:PRP45:RPS28B:RPL5:C7_02510W_A:ISY1:SUI3:CR_01700C_A:CR_03940W_A:CR_07080W_A:RPS27:DRS1	70507:30447:1902775:463:42254:30174:1990145:350:389:6267:388:244:447:1900153:27:349:1731:16567:9267:2181:42273:34247:6407:36170:33962:462:469:375:6406:42255:28:245:461:42038:9410:55:395:45292:492:1902626:465:30702:479:32956:16070:464:45903:6415:398:42274:2109:30490:6412:42256:6413:71216:56:54:36180:466:6364:35690
71826	ribonucleoprotein complex subunit organization	48 out of 1035 genes, 4.6%	141 out of 6473 background genes, 2.2%	0.00014	0	RRS1:RPL10:RPL6:RLI1:C1_04120C_A:C1_04710C_A:RPS14B:C1_06760C_A:C1_09040C_A:RPS17B:FGR16:CSI2:C1_12440W_A:RPS26A:PRP39:C2_02710C_A:RPF2:C2_06790W_A:RPL11:RPL12:C3_02670W_A:C3_04230W_A:YST1:NOG1:RLP24:HIT1:C4_02880C_A:C4_04930C_A:C4_05230C_A:C4_05330C_A:UBI3:C5_01540W_A:GCD11:SUI1:RPL25:NIP7:C6_02380W_A:PRP45:RPS28B:RPL5:C7_02510W_A:ISY1:SUI3:CR_01700C_A:CR_03940W_A:CR_07080W_A:RPS27:DRS1	70507:30447:1902775:463:42254:30174:1990145:350:389:6267:388:244:447:1900153:27:349:1731:16567:9267:2181:45727:42273:34247:6407:36170:33962:462:469:375:6406:42255:28:245:461:42038:9410:55:395:45292:492:1902626:465:30702:479:32956:16070:464:45903:6415:32790:398:42274:2109:30490:6412:42256:6413:71216:56:54:36180:466:6364:390:35690
98781	ncRNA transcription	25 out of 1035 genes, 2.4%	53 out of 6473 background genes, 0.8%	0.00017	0	C1_01860W_A:C1_05230W_A:RPA34:C1_12820C_A:C2_01070W_A:C2_02630W_A:TBF1:PZF1:RPC40:RPA12:RPC11:RPC53:C4_03040W_A:CBF1:HST3:RPO26:C5_04990W_A:C6_03210C_A:C7_01210C_A:CR_01950W_A:RPC19:RPC31:CR_02890C_A:SSU72:RPB8	70893:6361:30447:45899:1900239:6351:6386:98789:1015:6348:9303:61427:6369:31440:6362:6352:42797:16575:30847:6383:7059:42779:32215:1900375:42791:1174:1900429:46459:61432:98781:9086:42493:60261:6974:45944:1193:71459:1990678:44182:9299:6366:30702:31936:6282:6353:103:10833:32211:122:6384:31124:42790:6397:6363:6338:36166:6360:6368:34508:30846:6355:31564:1990414:32968:70940:6367:1990679:71572:1900478:93…
8152	metabolic process	580 out of 1035 genes, 56.0%	3157 out of 6473 background genes, 48.8%	0.00037	0	RPL16A:tT(AGU)6:CDC13:SPE1:ERG2:C1_00810W_A:RRS1:RPB11:CDC5:HMT1:C1_01150C_A:C1_01160C_A:DUT1:TIF:RPS21B:TRM2:RPS21:C1_01580W_A:MRP20:LSC1:C1_01860W_A:CYS4:SHA3:ABP140:C1_02310C_A:C1_02330C_A:C1_02430C_A:RPL10:HOM6:C1_02850W_A:RPP1A:RPL13:RPS16A:RPS1:RPL6:C1_03180W_A:RLI1:C1_03620C_A:RPP1:ELA1:C1_03830C_A:SEN15:C1_03940W_A:C1_04120C_A:BST1:SSA2:C1_04370C_A:ERG3:C1_04820C_A:SAP7:RHD1:ARG2:PSF2:C1_…	16237:32:1902546:6261:32889:70485:60258:45324:70893:1903338:6361:6596:6535:16074:33215:70507:31939:30447:1932:1902775:7049:31589:48478:463:55085:43409:7004:6227:6116:43103:6458:19343:722:6325:19280:71479:42766:42254:72530:18027:16255:1903272:30174:9113:45899:742:7114:6657:34497:1990145:30968:350:8361:10520:6233:226:6673:31497:1903459:60583:76:71027:51229:1900239:389:35719:34975:6662:6312:6003:190…
51029	rRNA transport	10 out of 1035 genes, 1.0%	12 out of 6473 background genes, 0.2%	0.00096	0	RPS21:RPS26A:RPS10:RPS15:RPS19A:YST1:RPS5:RPS28B:RPS18:RPS3	447:1900153:2181:6407:469:42255:28:461:45903:42274:30490:6412:56
6407	rRNA export from nucleus	10 out of 1035 genes, 1.0%	12 out of 6473 background genes, 0.2%	0.00096	0	RPS21:RPS26A:RPS10:RPS15:RPS19A:YST1:RPS5:RPS28B:RPS18:RPS3	447:1900153:2181:6407:469:42255:28:461:45903:42274:30490:6412:56
9987	cellular process	703 out of 1035 genes, 67.9%	3960 out of 6473 background genes, 61.2%	0.00105	0	RPL16A:tT(AGU)6:CDC13:CNS1:TUB2:SPE1:ERG2:C1_00810W_A:NRM1:RRS1:RPB11:CDC5:HMT1:C1_01150C_A:C1_01160C_A:DUT1:TIF:RPS21B:TRM2:RPS21:C1_01580W_A:MRP20:LSC1:C1_01860W_A:CYS4:SHA3:ABP140:SEP7:C1_02290C_A:C1_02310C_A:C1_02330C_A:TIM21:C1_02430C_A:RPL10:C1_02500W_A:C1_02510W_A:HOM6:TOM20:C1_02850W_A:YPT7:RPP1A:RPL13:RPS16A:TEM1:RPS1:RPL6:C1_03180W_A:ECM33:ARX1:RLI1:C1_03620C_A:C1_03790C_A:RPP1:ELA1:C1_…	6261:32889:70485:15749:60258:6361:6535:33215:70507:30447:1932:1902775:463:7004:6227:6116:48311:722:71479:42766:42254:72530:16255:1903272:30174:45899:742:10421:6657:350:6233:6673:1903459:76:51229:389:35719:917:51987:6003:70785:6177:71033:32995:7023:15671:61163:34198:7127:706:6351:140018:34517:35863:6616:10570:98789:70783:10919:6276:1905168:9405:43631:45176:51083:1903353:31578:70887:10513:2000220:2…
90502	RNA phosphodiester bond hydrolysis, endonucleolytic	24 out of 1035 genes, 2.3%	56 out of 6473 background genes, 0.9%	0.00281	0	RRS1:RPS21B:RPP1:LHP1:C1_10880W_A:RPL37B:KRR1:CSI2:C1_14080W_A:RPL17B:NOC4:C3_02040C_A:C3_02840W_A:YST1:C3_07800C_A:UTP13:C5_03920C_A:C5_04840C_A:NOP5:RPS18:ENP1:CR_03360W_A:RPS27:CR_10410C_A	30447:42254:447:480:294:2181:6407:36170:45943:8298:34965:461:55:43248:465:479:6396:472:6412:8033:27:1905267:42779:9267:42273:462:42255:16973:28:61818:34414:464:42274:448:71216:36180:6364:35690
8033	tRNA processing	35 out of 1035 genes, 3.4%	99 out of 6473 background genes, 1.5%	0.00319	0	C1_01150C_A:TRM2:ABP140:RPP1:SEN15:LHP1:C1_11160C_A:C1_12570C_A:C2_01510C_A:KTI11:C2_05670C_A:C2_06480W_A:C2_08840W_A:C2_09500W_A:SMM1:RPC11:C3_02840W_A:TRM12:C4_00740W_A:C4_00880W_A:C4_00940W_A:C4_01500W_A:SEN2:C4_03140C_A:C4_04810C_A:C5_01610W_A:POP4:C7_00330C_A:THG1:C7_02340C_A:C7_03990C_A:CR_00670C_A:TRM1:CR_03160W_A:POP3	6351:140018:2939:447:70476:1522:2940:294:51017:55114:34965:34599:18364:98787:34227:6396:106004:31119:6450:30490:30488:1990481:2949:470:8033:7114:6386:2143:723:2926:379:6388:6357:42797:1905267:17183:42779:42273:32447:2098:61818:70525:34414:1680:6400:1403:6379:42274:32259:6364:31591:35690
6383	transcription by RNA polymerase III	16 out of 1035 genes, 1.5%	30 out of 6473 background genes, 0.5%	0.00483	0	C1_01860W_A:C1_05230W_A:C1_12820C_A:PZF1:RPC40:RPC11:RPC53:C4_03040W_A:RPO26:C5_04990W_A:C6_03210C_A:C7_01210C_A:RPC19:RPC31:CR_02890C_A:RPB8	45899:6351:6352:6383:42791:1193:6360:31564:6367:70893:6386:31440:6362:42797:42779:42493:6366:6384:6368:6355:32968
34622	cellular protein-containing complex assembly	98 out of 1035 genes, 9.5%	397 out of 6473 background genes, 6.1%	0.00487	0	TUB2:RRS1:SEP7:C1_02290C_A:RPL10:C1_02500W_A:TOM20:RPL6:C1_03790C_A:C1_04120C_A:C1_04180W_A:C1_04710C_A:C1_05660C_A:GIM5:RPS14B:C1_06640C_A:C1_06760C_A:C1_09040C_A:C1_09620C_A:RPS17B:C1_11110C_A:FGR16:CSI2:C1_12440W_A:C1_14090W_A:C2_01440C_A:RPS26A:C2_01720C_A:PRP39:C2_02710C_A:MDM10:RPF2:CDC7:C2_05510C_A:CDC46:C2_06530W_A:C2_06790W_A:RPL11:C2_06950C_A:C2_07800W_A:KIP2:C3_00340W_A:PMA1:RPL12:C3_0…	60258:70507:30447:1932:1902775:463:48311:722:71479:42254:30174:350:389:917:7023:61163:70783:9405:45176:10691:70584:35066:447:6303:30150:1904968:33260:43486:6457:31031:98863:1900153:43618:7533:43504:51726:6352:61408:6754:349:6336:724:30473:7059:16567:32979:2181:10458:1900233:6407:36170:72742:1902977:31938:33962:1905263:43622:18107:31505:120029:375:7018:51090:34982:7020:6335:61432:9086:461:51382:68…
478	endonucleolytic cleavage involved in rRNA processing	23 out of 1035 genes, 2.2%	54 out of 6473 background genes, 0.8%	0.0053	0	RRS1:RPS21B:RPP1:C1_10880W_A:RPL37B:KRR1:CSI2:C1_14080W_A:RPL17B:NOC4:C3_02040C_A:C3_02840W_A:YST1:C3_07800C_A:UTP13:C5_03920C_A:C5_04840C_A:NOP5:RPS18:ENP1:CR_03360W_A:RPS27:CR_10410C_A	30447:42254:447:480:294:2181:6407:36170:45943:8298:34965:461:55:43248:465:479:6396:472:6412:8033:27:1905267:9267:42273:462:42255:16973:28:464:42274:448:71216:36180:6364:35690
479	endonucleolytic cleavage of tricistronic rRNA transcript (SSU-rRNA, 5.8S rRNA, LSU-rRNA)	23 out of 1035 genes, 2.2%	54 out of 6473 background genes, 0.8%	0.0053	0	RRS1:RPS21B:RPP1:C1_10880W_A:RPL37B:KRR1:CSI2:C1_14080W_A:RPL17B:NOC4:C3_02040C_A:C3_02840W_A:YST1:C3_07800C_A:UTP13:C5_03920C_A:C5_04840C_A:NOP5:RPS18:ENP1:CR_03360W_A:RPS27:CR_10410C_A	30447:42254:447:480:294:2181:6407:36170:45943:8298:34965:461:55:43248:465:479:6396:472:6412:8033:27:1905267:9267:42273:462:42255:16973:28:464:42274:448:71216:36180:6364:35690
70925	organelle assembly	40 out of 1035 genes, 3.9%	123 out of 6473 background genes, 1.9%	0.00673	0.0003	TUB2:RRS1:CDC5:SEP7:RPL10:RPL6:C1_04710C_A:RPS14B:C1_06760C_A:C1_09040C_A:RPS17B:CSI2:C1_12440W_A:RPS26A:C2_02710C_A:RPF2:RPL11:RPL12:C3_02670W_A:YST1:C4_02880C_A:C4_05230C_A:C4_05330C_A:UBI3:C5_01540W_A:RPL25:NIP7:C6_02380W_A:MOB1:RPS28B:RPL5:C7_02510W_A:CR_03940W_A:CDC10:CR_06520C_A:CR_06740W_A:CR_07080W_A:RPS27:CR_10180W_A:DRS1	70507:30447:1902775:463:42254:30174:917:61163:70783:9405:1903353:2000220:447:31031:98863:301:1900153:6913:35025:30473:16567:1900461:2181:10458:6407:36170:33962:31505:7020:461:51382:6874:7096:42038:55:6281:48315:1402:1902626:44182:46827:43934:465:10696:479:10973:34613:51455:8104:16070:281:45903:6415:70583:6468:44406:30490:915:32258:1990734:6412:6886:70194:110083:42147:712:35556:31122:32186:90306:4…
65003	protein-containing complex assembly	100 out of 1035 genes, 9.7%	412 out of 6473 background genes, 6.4%	0.00855	0.0003	TUB2:RRS1:SEP7:C1_02290C_A:RPL10:C1_02500W_A:TOM20:RPL6:C1_03790C_A:C1_04120C_A:C1_04180W_A:C1_04710C_A:C1_05660C_A:GIM5:RPS14B:C1_06640C_A:C1_06760C_A:C1_09040C_A:C1_09620C_A:RPS17B:C1_11110C_A:FGR16:CSI2:C1_12440W_A:ATP20:C1_14090W_A:C2_01440C_A:RPS26A:C2_01720C_A:PRP39:C2_02710C_A:MDM10:RPF2:CDC7:C2_05510C_A:CDC46:C2_06530W_A:C2_06790W_A:RPL11:C2_06950C_A:C2_07800W_A:KIP2:C3_00340W_A:PMA1:RPL1…	60258:70507:30447:1932:1902775:463:48311:722:71479:42254:30174:350:389:917:7023:61163:70783:9405:45176:10691:70584:35066:447:6303:30150:1904968:33260:43486:6457:31031:98863:1900153:43618:7533:43504:51726:6352:61408:6754:349:6336:724:30473:7059:16567:32979:2181:10458:1900233:6407:36170:72742:1902977:31938:33962:1905263:15986:43622:18107:31505:120029:375:7018:51090:34982:7020:6335:61432:9086:461:51…
9451	RNA modification	33 out of 1035 genes, 3.2%	96 out of 6473 background genes, 1.5%	0.01267	0.0003	C1_01150C_A:TRM2:ABP140:C1_11160C_A:C1_12570C_A:DIM1:C2_01510C_A:C2_02120W_A:C2_04820W_A:KTI11:C2_06480W_A:C2_08840W_A:C2_09500W_A:SMM1:C3_05860C_A:TRM12:C4_00940W_A:C4_01500W_A:C4_03140C_A:C4_04810C_A:C4_06950W_A:C5_01610W_A:C7_00330C_A:THG1:C7_02340C_A:C7_03990C_A:CR_00670C_A:TRM1:CR_01780W_A:CR_03160W_A:NHP2:NOP10:CR_10260W_A	42254:140018:2939:70476:1522:2940:51017:55114:34599:154:18364:34227:31118:6396:106004:31119:6450:30490:30488:1990481:2949:31120:470:8033:1903109:7114:2143:723:2926:6391:6357:17183:42273:70475:32447:462:469:2098:45944:70525:6400:1403:42274:31167:32259:6364:31591
97064	ncRNA export from nucleus	14 out of 1035 genes, 1.4%	26 out of 6473 background genes, 0.4%	0.01797	0.0003	RPS21:RPS26A:C2_05220C_A:RPS10:UTP8:RPS15:RPS19A:YST1:RPS5:RPS28B:RPS18:C7_04200C_A:CEX1:RPS3	447:1900153:71528:2181:6407:45943:461:122:45903:973:30490:6412:45893:31081:30466:6302:6606:462:469:42255:28:16973:45944:35392:34398:6409:42274:31990:56
44267	cellular protein metabolic process	233 out of 1035 genes, 22.5%	1147 out of 6473 background genes, 17.7%	0.01953	0.0002	RPL16A:tT(AGU)6:C1_00810W_A:CDC5:HMT1:TIF:RPS21B:RPS21:C1_01580W_A:MRP20:SHA3:C1_02330C_A:C1_02430C_A:RPL10:RPP1A:RPL13:RPS16A:RPS1:RPL6:C1_03180W_A:RLI1:C1_03620C_A:ELA1:BST1:SSA2:C1_04370C_A:C1_04820C_A:C1_05720W_A:C1_06070W_A:MSI3:RPS14B:RPS22A:C1_06470W_A:C1_06890C_A:C1_07280C_A:GPI8:VRG4:C1_07850C_A:DPM1:C1_09040C_A:C1_09840C_A:C1_09910C_A:TPK1:RPL42:C1_10470W_A:RPS17B:RPL29:C1_11160C_A:RPL3…	60258:30447:1932:463:7004:722:42254:16255:1903272:30174:742:51229:35719:34517:6616:10570:98789:6276:9405:51083:1903353:70887:2000220:44416:110045:35066:447:1900231:6421:44878:35853:18026:70987:36187:70476:1904968:43486:6457:6431:51447:31031:45184:43624:1900153:43618:60633:7093:43936:30071:36178:51726:6352:31536:15833:6913:413:1990570:6336:60567:35025:45892:1900189:724:36244:16575:30847:1900428:70…
447	endonucleolytic cleavage in ITS1 to separate SSU-rRNA from 5.8S rRNA and LSU-rRNA from tricistronic rRNA transcript (SSU-rRNA, 5.8S rRNA, LSU-rRNA)	19 out of 1035 genes, 1.8%	43 out of 6473 background genes, 0.7%	0.02048	0.0002	RRS1:RPS21B:RPP1:C1_10880W_A:KRR1:C1_14080W_A:NOC4:C3_02040C_A:C3_02840W_A:YST1:C3_07800C_A:UTP13:C5_03920C_A:C5_04840C_A:NOP5:RPS18:ENP1:CR_03360W_A:CR_10410C_A	30447:42254:447:480:294:2181:6407:36170:45943:8298:34965:461:55:43248:6396:472:6412:8033:1905267:9267:42273:462:42255:16973:28:42274:71216:36180:6364:35690
6450	regulation of translational fidelity	10 out of 1035 genes, 1.0%	15 out of 6473 background genes, 0.2%	0.02752	0.0002	RPS21:C1_09040C_A:C1_12570C_A:RPS9B:C2_05410W_A:ZUO1:SSZ1:GCD11:C7_00330C_A:SSB1	30447:140018:51083:44416:2181:6407:42038:44182:6452:45903:6450:6412:2949:723:2926:6357:27:1731:462:2098:70525:42149:6413:54:6364
470	maturation of LSU-rRNA	19 out of 1035 genes, 1.8%	44 out of 6473 background genes, 0.7%	0.0307	0.0002	C1_05720W_A:RPL37B:CSI2:RPL17B:RPF2:MAK16:C2_08840W_A:RRP15:RPL35:RPL8B:HIT1:C4_05330C_A:CIC1:C6_01890C_A:NIP7:NOP15:CR_03940W_A:RPL7:CR_07080W_A	70507:30447:463:42254:30174:70476:2181:36170:1902626:465:18364:30490:915:30488:6412:470:6267:27:9267:42273:42255:492:30163:32956:464:42274:42256:448:71216:54:36180:466:6364:35690
Molecular function
GOID	GO_term	Cluster frequency	Background frequency	Corrected P-value	False discovery rate	Gene(s) annotated to the term	Directly Annotated GOID List
3735	structural constituent of ribosome	119 out of 1035 genes, 11.5%	164 out of 6473 background genes, 2.5%	1.01e-57	0	RPL16A:RPS21B:RPS21:C1_01580W_A:MRP20:RPS42:C1_01680C_A:C1_02330C_A:RPL10:RPP1A:RPL13:RPS16A:RPS1:RPL6:C1_03620C_A:C1_04370C_A:C1_04820C_A:MRPL37:C1_05720W_A:C1_06070W_A:RPS14B:RPS22A:C1_06470W_A:C1_06890C_A:MRPL3:C1_08520C_A:C1_08920W_A:RPL42:C1_10470W_A:RPS17B:RPL29:RPL37B:MRPS9:RPL27A:RPL14:RPL38:C2_01030W_A:RPS26A:C2_01740C_A:C2_02270C_A:C2_03560C_A:RPL21A:RPS9B:C2_03950W_A:RPL39:RPL17B:C2_04…	30674:3906:3735:19843:70628:46872:166:70181:30295:34236:4784:3725:31386:30627:70180:3723:4525:8097
5198	structural molecule activity	130 out of 1035 genes, 12.6%	230 out of 6473 background genes, 3.6%	3.1e-44	0	RPL16A:TUB2:RPS21B:RPS21:C1_01580W_A:MRP20:RPS42:C1_01680C_A:SEP7:C1_02330C_A:RPL10:RPP1A:RPL13:RPS16A:RPS1:RPL6:C1_03620C_A:C1_04370C_A:C1_04820C_A:MRPL37:C1_05660C_A:C1_05720W_A:C1_06070W_A:RPS14B:RPS22A:C1_06470W_A:C1_06890C_A:MRPL3:C1_08520C_A:C1_08920W_A:NUP188:RPL42:C1_10470W_A:RPS17B:RPL29:RPL37B:MRPS9:RPL27A:RPL14:RPL38:C2_01030W_A:RPS26A:C2_01740C_A:C2_02270C_A:C2_03560C_A:RPL21A:RPS9B:C…	3906:3735:44877:5200:166:10314:70181:34236:3725:60090:70273:8320:5545:30627:17056:30674:19843:15450:46872:70628:43015:30295:4784:1990841:3682:5525:5198:31386:1990188:3924:70180:3723:4525:8097
140098	catalytic activity, acting on RNA	72 out of 1035 genes, 7.0%	225 out of 6473 background genes, 3.5%	4.63e-07	0	RPB11:C1_01150C_A:TIF:TRM2:ABP140:RPP1:SEN15:C1_04120C_A:C1_05230W_A:MRPL3:RPA34:C1_12350W_A:WRS1:C1_12820C_A:DIM1:C2_01070W_A:C2_02120W_A:SUV3:C2_04820W_A:C2_05080C_A:RPC40:C2_05670C_A:C2_06480W_A:C2_07200W_A:RPA12:C2_08840W_A:C2_09310C_A:C2_09500W_A:SMM1:RPC11:SES1:C3_02840W_A:C3_05860C_A:C4_00740W_A:C4_00880W_A:SEN2:RPC53:C4_03040W_A:C4_04810C_A:PRI2:NAM7:MSW1:RPO26:C5_03920C_A:MES1:C5_04990W_…	16423:384:3735:4535:106050:8270:8757:179:4828:3896:52929:4831:4386:17111:3743:4532:3899:175:61629:30674:4809:8989:16817:287:1056:4526:52928:8276:46983:1990400:4521:4830:5524:70042:52735:4812:51015:8650:8176:50660:8859:1055:8536:4810:166:4816:8186:3724:3697:33677:4825:3725:16433:14:3677:4045:49:16887:4518:3824:8143:4815:52905:3676:8168:42134:8173:3678:43024:3968:51908:8175:16779:34246:30696:16435:…
3899	DNA-directed 5'-3' RNA polymerase activity	21 out of 1035 genes, 2.0%	34 out of 6473 background genes, 0.5%	8.57e-07	0	RPB11:C1_05230W_A:RPA34:C1_12820C_A:C2_01070W_A:RPC40:C2_07200W_A:RPA12:RPC11:RPC53:C4_03040W_A:PRI2:RPO26:C5_04990W_A:C6_03210C_A:C7_01210C_A:CR_01950W_A:RPC19:RPC31:CR_02890C_A:RPB8	8270:3896:3899:61629:1056:46983:1055:3697:3677:3676:3968:1054
1056	RNA polymerase III activity	14 out of 1035 genes, 1.4%	17 out of 6473 background genes, 0.3%	1.32e-06	0	C1_05230W_A:C1_12820C_A:RPC40:RPC11:RPC53:C4_03040W_A:RPO26:C5_04990W_A:C6_03210C_A:C7_01210C_A:RPC19:RPC31:CR_02890C_A:RPB8	8270:3899:1056:46983:1055:3677:3676:3968:1054
34062	5'-3' RNA polymerase activity	21 out of 1035 genes, 2.0%	35 out of 6473 background genes, 0.5%	1.82e-06	0	RPB11:C1_05230W_A:RPA34:C1_12820C_A:C2_01070W_A:RPC40:C2_07200W_A:RPA12:RPC11:RPC53:C4_03040W_A:PRI2:RPO26:C5_04990W_A:C6_03210C_A:C7_01210C_A:CR_01950W_A:RPC19:RPC31:CR_02890C_A:RPB8	8270:3896:3899:61629:1056:46983:1055:3697:3677:3676:3968:1054
97747	RNA polymerase activity	21 out of 1035 genes, 2.0%	35 out of 6473 background genes, 0.5%	1.82e-06	0	RPB11:C1_05230W_A:RPA34:C1_12820C_A:C2_01070W_A:RPC40:C2_07200W_A:RPA12:RPC11:RPC53:C4_03040W_A:PRI2:RPO26:C5_04990W_A:C6_03210C_A:C7_01210C_A:CR_01950W_A:RPC19:RPC31:CR_02890C_A:RPB8	8270:3896:3899:61629:1056:46983:1055:3697:3677:3676:3968:1054
19843	rRNA binding	21 out of 1035 genes, 2.0%	40 out of 6473 background genes, 0.6%	4.59e-05	0	RPS21:RPS14B:CSI2:RMP1:C2_01030W_A:C2_02710C_A:RPS9B:RPF2:RPL9B:MRP17:SNM1:RPS13:CIC1:C6_02380W_A:POP4:NOG2:NOP15:RPL5:CR_00460C_A:MRPL6:IMP4	3735:70181:4386:30515:30674:19843:4526:1990400:5525:8312:5524:70180:43047:166:3724:3676:70628:42134:4540:3723:171:8097
3723	RNA binding	125 out of 1035 genes, 12.1%	511 out of 6473 background genes, 7.9%	7.59e-05	0	RPL16A:tT(AGU)6:RRS1:C1_01160C_A:TIF:RPS21:RPS42:C1_01940C_A:C1_02330C_A:C1_02430C_A:C1_02850W_A:RPL6:C1_03370W_A:RPP1:C1_03830C_A:SSA2:RPS14B:LHP1:MRPL3:C1_07960W_A:C1_08890C_A:C1_10470W_A:C1_10880W_A:KRR1:C1_11910W_A:CSI2:C1_12350W_A:C1_12570C_A:RPL14:RMP1:C1_14080W_A:C2_01030W_A:PRP39:C2_02710C_A:RPS9B:RPL39:GCD7:C2_04700C_A:C2_04820W_A:ERF1:C2_05160C_A:RPF2:UTP15:RPS4A:UTP8:C3_02040C_A:RPL9B:…	48027:43022:3747:3735:31369:5543:33437:4535:8270:70181:30942:34236:8428:3727:52929:3690:4831:4730:33592:4386:30515:3743:42030:4532:30234:16149:175:30674:4809:8989:19843:35925:287:3746:4526:30145:52928:1990400:4521:3682:1990825:5525:8312:34513:5524:3730:4652:61711:30619:4812:70180:80025:8266:3906:1047:8536:36002:43047:4810:44877:30544:166:70336:30620:8186:32266:3724:3729:42277:8047:8235:3725:51879…
1054	RNA polymerase I activity	10 out of 1035 genes, 1.0%	13 out of 6473 background genes, 0.2%	0.00089	0	RPA34:C1_12820C_A:C2_01070W_A:RPC40:RPA12:C4_03040W_A:RPO26:CR_01950W_A:RPC19:RPB8	8270:3899:61629:1056:46983:1055:3677:3676:3968:1054
140101	catalytic activity, acting on a tRNA	31 out of 1035 genes, 3.0%	87 out of 6473 background genes, 1.3%	0.00258	0	C1_01150C_A:TRM2:ABP140:RPP1:SEN15:WRS1:C2_05670C_A:C2_06480W_A:C2_08840W_A:C2_09310C_A:C2_09500W_A:SMM1:SES1:C3_02840W_A:C4_00740W_A:C4_00880W_A:SEN2:C4_04810C_A:MSW1:MES1:C6_01050W_A:POP4:C7_02340C_A:DED81:CR_00670C_A:TRM1:CR_01570W_A:FRS1:CR_03160W_A:DPS1-1:POP3	16423:106050:4828:52929:4831:30674:4809:287:4526:52928:8276:4830:5524:52735:4812:51015:8176:50660:4810:4816:4825:14:4045:49:4518:3824:4815:52905:3676:8168:42134:8173:51908:8175:16779:16435:30696:213:4826:4540:17150:50567:3723:171
8168	methyltransferase activity	33 out of 1035 genes, 3.2%	96 out of 6473 background genes, 1.5%	0.00317	0	HMT1:C1_01150C_A:TRM2:ABP140:SAM4:C1_09040C_A:DIM1:C2_02120W_A:C2_03130W_A:C2_04820W_A:C2_05080C_A:COQ5:C2_06480W_A:C2_08840W_A:ERG6:C3_03310C_A:C3_05860C_A:TRM12:C4_04500C_A:C4_04810C_A:RMT2:SDC1:C5_05150C_A:SWD3:C6_02250W_A:C7_02340C_A:CR_00670C_A:TRM1:CR_01780W_A:KAR4:CR_03160W_A:CR_03760W_A:CR_10260W_A	16423:106050:8757:179:8898:42800:30674:4809:8989:8276:18064:43334:35242:70042:3838:52735:16279:51015:8650:8176:8469:16765:19702:16433:14:3700:52905:3676:8168:8173:51908:16274:8175:34246:16435:30696:44020:71885:35241:3723:16740
8757	S-adenosylmethionine-dependent methyltransferase activity	27 out of 1035 genes, 2.6%	72 out of 6473 background genes, 1.1%	0.00348	0	HMT1:ABP140:SAM4:C1_09040C_A:DIM1:C2_02120W_A:C2_03130W_A:C2_04820W_A:C2_05080C_A:COQ5:C2_06480W_A:C2_08840W_A:ERG6:C3_03310C_A:C3_05860C_A:TRM12:C4_04500C_A:C4_04810C_A:RMT2:SDC1:C5_05150C_A:SWD3:C7_02340C_A:TRM1:CR_01780W_A:CR_03760W_A:CR_10260W_A	16423:8757:179:8898:42800:30674:4809:8989:8276:18064:43334:35242:70042:3838:52735:16279:51015:8650:8176:8469:16765:19702:16433:52905:3676:8168:8173:16274:34246:16435:44020:71885:35241:3723:16740
8173	RNA methyltransferase activity	17 out of 1035 genes, 1.6%	37 out of 6473 background genes, 0.6%	0.00794	0	C1_01150C_A:TRM2:ABP140:DIM1:C2_02120W_A:C2_04820W_A:C2_05080C_A:C2_06480W_A:C2_08840W_A:C3_05860C_A:C4_04810C_A:C7_02340C_A:CR_00670C_A:TRM1:CR_01780W_A:CR_03160W_A:CR_10260W_A	16423:106050:8757:179:30674:4809:8989:8276:70042:52735:51015:8650:8176:16433:14:52905:8168:8173:51908:8175:34246:16435:30696:3723
51082	unfolded protein binding	25 out of 1035 genes, 2.4%	69 out of 6473 background genes, 1.1%	0.015	0	SSA2:GIM5:CHS7:C1_11110C_A:C1_12680W_A:C1_14090W_A:KAR2:CCT2:NSG2:EGD2:C3_05120C_A:TIM10:C4_02780W_A:SSZ1:C4_05860W_A:CCT7:CCT3:C6_01460C_A:TIM9:YDJ1:CR_04650W_A:SSB1:VMA22:CR_10410C_A:CPR6	43022:70273:140318:31072:51087:48487:3755:5524:80025:32266:42277:49:16887:1671:51082:15631:70300:3723
16741	transferase activity, transferring one-carbon groups	33 out of 1035 genes, 3.2%	103 out of 6473 background genes, 1.6%	0.01679	0	HMT1:C1_01150C_A:TRM2:ABP140:SAM4:C1_09040C_A:DIM1:C2_02120W_A:C2_03130W_A:C2_04820W_A:C2_05080C_A:COQ5:C2_06480W_A:C2_08840W_A:ERG6:C3_03310C_A:C3_05860C_A:TRM12:C4_04500C_A:C4_04810C_A:RMT2:SDC1:C5_05150C_A:SWD3:C6_02250W_A:C7_02340C_A:CR_00670C_A:TRM1:CR_01780W_A:KAR4:CR_03160W_A:CR_03760W_A:CR_10260W_A	16423:106050:8757:179:8898:42800:30674:4809:8989:8276:18064:43334:35242:70042:3838:52735:16279:51015:8650:8176:8469:16765:19702:16433:14:3700:52905:3676:8168:8173:51908:16274:8175:34246:16435:30696:44020:71885:35241:3723:16740
8170	N-methyltransferase activity	16 out of 1035 genes, 1.5%	36 out of 6473 background genes, 0.6%	0.02341	0	HMT1:C1_09040C_A:DIM1:C2_02120W_A:C2_03130W_A:C2_04820W_A:C2_08840W_A:C3_05860C_A:C4_04500C_A:RMT2:SDC1:C5_05150C_A:SWD3:TRM1:CR_01780W_A:CR_03760W_A	8757:179:42800:4809:8989:8276:18064:35242:70042:16279:8469:19702:8168:8173:16274:34246:16435:44020:71885:35241:3723
3676	nucleic acid binding	209 out of 1035 genes, 20.2%	1043 out of 6473 background genes, 16.1%	0.03992	0	RPL16A:C1_00200C_A:tT(AGU)6:RRS1:RPB11:CDC5:C1_01160C_A:TIF:RPS21:RPS42:C1_01860W_A:C1_01940C_A:C1_02310C_A:C1_02330C_A:C1_02430C_A:C1_02450C_A:C1_02850W_A:RPL6:C1_03370W_A:RPP1:C1_03830C_A:C1_04120C_A:C1_04180W_A:SSA2:C1_05220C_A:C1_05230W_A:RPS14B:C1_07490C_A:LHP1:MRPL3:C1_07960W_A:C1_08890C_A:C1_09670C_A:HCM1:C1_10470W_A:C1_10880W_A:C1_11050W_A:KRR1:C1_11910W_A:CSI2:C1_12350W_A:C1_12570C_A:C1_…	48027:384:3747:5543:33437:4535:70181:30942:34236:8428:3727:3896:8494:52929:400:4674:3690:4831:30515:3743:42030:175:61629:981:4809:19843:16817:287:8409:987:978:4526:1010:1990400:3689:3682:8312:34513:5524:3688:4652:45145:61711:30619:4812:70180:80025:3906:8859:3684:17108:36002:43047:4810:44877:31490:4816:3887:43023:3713:3697:33677:3725:51879:30621:51219:3677:42162:3700:4177:49:16887:19237:404:3824:9…
Cellular component
GOID	GO_term	Cluster frequency	Background frequency	Corrected P-value	False discovery rate	Gene(s) annotated to the term	Directly Annotated GOID List
1990904	ribonucleoprotein complex	262 out of 1035 genes, 25.3%	592 out of 6473 background genes, 9.1%	1.41e-64	0	RPL16A:RRS1:TIF:RPS21B:RPS21:C1_01580W_A:MRP20:RPS42:C1_01680C_A:CYS4:C1_01940C_A:C1_02330C_A:C1_02430C_A:C1_02450C_A:RPL10:C1_02850W_A:RPP1A:RPL13:RPS16A:RPS1:RPL6:ARX1:C1_03370W_A:C1_03620C_A:RPP1:C1_04120C_A:SSA2:C1_04370C_A:C1_04710C_A:C1_04820C_A:MRPL37:REI1:C1_05630C_A:C1_05720W_A:C1_06070W_A:MSI3:RPS14B:RPS22A:C1_06470W_A:C1_06890C_A:LHP1:MRPL3:C1_08520C_A:C1_08890C_A:C1_08920W_A:C1_08970W…	5763:5956:5684:5655:9986:5654:30692:5786:42645:324:5732:5762:329:42788:5886:15934:31429:71006:16282:5688:30685:22625:243:30686:71004:22627:5622:5737:5681:5840:932:5854:71007:71020:1990726:30684:71014:30688:9277:32545:1990904:22626:784:5850:71008:30532:18444:5853:17102:30677:42175:33290:33553:32040:1990861:5697:71541:16021:71540:30687:5844:61671:48500:46540:172:30445:34455:15935:30446:5686:62040:5…
5840	ribosome	131 out of 1035 genes, 12.7%	194 out of 6473 background genes, 3.0%	7.83e-58	0	RPL16A:RPS21B:RPS21:C1_01580W_A:MRP20:RPS42:C1_01680C_A:C1_02330C_A:C1_02430C_A:RPL10:RPP1A:RPL13:RPS16A:RPS1:RPL6:C1_03370W_A:C1_03620C_A:C1_04370C_A:C1_04820C_A:MRPL37:C1_05720W_A:C1_06070W_A:RPS14B:RPS22A:C1_06470W_A:C1_06890C_A:MRPL3:C1_08520C_A:C1_08920W_A:RPL42:C1_10470W_A:RPS17B:RPL29:RPL37B:MRPS9:RPL27A:RPL14:RPL38:C2_01030W_A:RPS26A:C2_01740C_A:C2_02270C_A:C2_03560C_A:RPL21A:RPS9B:C2_039…	5763:9986:42645:324:5762:329:42788:15934:22625:30686:22627:5622:5737:5840:5854:71014:30688:22626:5853:32040:16021:30687:5844:61671:30445:15935:30446:62040:5761:5829:5739:5730:16020:5634:10494:32592:5576
44391	ribosomal subunit	114 out of 1035 genes, 11.0%	164 out of 6473 background genes, 2.5%	5.75e-52	0	RPL16A:RPS21B:RPS21:C1_01580W_A:MRP20:RPS42:C1_01680C_A:C1_02330C_A:C1_02430C_A:RPL10:RPP1A:RPL13:RPS1:RPL6:C1_04370C_A:MRPL37:C1_05720W_A:C1_06070W_A:RPS22A:C1_06470W_A:C1_06890C_A:MRPL3:C1_08520C_A:C1_08920W_A:RPL42:C1_10470W_A:RPL29:RPL37B:MRPS9:RPL27A:RPL14:RPL38:C2_01030W_A:C2_01740C_A:C2_02270C_A:C2_03560C_A:RPL21A:RPS9B:C2_03950W_A:RPL39:RPL17B:C2_04700C_A:C2_04790C_A:MRPL10:C2_05160C_A:C2…	5763:9986:42645:324:5762:15934:22625:30686:22627:5622:5737:5840:30688:22626:32040:16021:30687:30445:15935:30446:5761:62040:5829:5739:5730:16020:5634:10494:5576
32991	protein-containing complex	486 out of 1035 genes, 47.0%	1855 out of 6473 background genes, 28.7%	3.56e-40	0	RPL16A:TUB2:C1_00810W_A:RRS1:RPB11:C1_01160C_A:TIF:RPS21B:RPS21:C1_01580W_A:MRP20:RPS42:C1_01680C_A:CYS4:C1_01940C_A:C1_02310C_A:C1_02330C_A:TIM21:C1_02430C_A:C1_02450C_A:RPL10:C1_02510W_A:TOM20:C1_02850W_A:RPP1A:RPL13:RPS16A:RPS1:RPL6:ARX1:RLI1:C1_03370W_A:C1_03620C_A:RPP1:ELA1:C1_03830C_A:SEN15:C1_04120C_A:C1_04180W_A:SSA2:C1_04370C_A:C1_04710C_A:C1_04820C_A:MRPL37:PSF2:REI1:C1_05230W_A:SSH1:C1…	5666:5669:5684:276:5655:9986:118:5744:45254:5720:51286:5881:70210:5759:71563:1990023:5688:30685:32153:1990871:43541:5662:22627:42272:46695:5681:8541:2144:1990131:71020:1990726:5950:31389:5719:33255:930:32865:31982:1990904:34515:30015:71008:31251:18444:5784:5853:812:1902716:5789:31021:31415:794:1990861:61576:5663:34245:42406:5875:811:120105:8023:61496:783:32301:48500:776:34455:178:71957:5761:62040…
43228	non-membrane-bounded organelle	333 out of 1035 genes, 32.2%	1125 out of 6473 background genes, 17.4%	3.94e-35	0	RPL16A:CDC13:TUB2:RRS1:CDC5:TIF:RPS21B:RPS21:C1_01580W_A:MRP20:RPS42:C1_01680C_A:LSC1:CYS4:ABP140:SEP7:C1_02310C_A:C1_02330C_A:C1_02430C_A:RPL10:C1_02850W_A:RPP1A:RPL13:RPS16A:TEM1:RPS1:RPL6:ARX1:C1_03370W_A:C1_03620C_A:C1_03790C_A:RPP1:C1_04180W_A:C1_04370C_A:C1_04820C_A:MRPL37:PSF2:C1_05230W_A:C1_05630C_A:C1_05720W_A:C1_06070W_A:RPS14B:RPS22A:C1_06470W_A:C1_06540C_A:C1_06630W_A:C1_06760C_A:C1_0…	5666:5655:9986:118:45254:5720:51286:5881:70210:5759:71563:1990023:5688:30685:5887:32153:5662:22627:42272:1990707:8541:1990131:1990726:31389:5719:33255:930:31982:1990904:34515:18444:5853:812:1902716:31021:794:1990861:5663:34245:5875:811:120105:61496:783:776:34455:178:71957:62040:5761:131:16586:5938:1990334:34456:34388:1990879:10494:31391:1903754:778:32160:110085:5658:120155:324:5815:5762:16459:427…
43232	intracellular non-membrane-bounded organelle	333 out of 1035 genes, 32.2%	1125 out of 6473 background genes, 17.4%	3.94e-35	0	RPL16A:CDC13:TUB2:RRS1:CDC5:TIF:RPS21B:RPS21:C1_01580W_A:MRP20:RPS42:C1_01680C_A:LSC1:CYS4:ABP140:SEP7:C1_02310C_A:C1_02330C_A:C1_02430C_A:RPL10:C1_02850W_A:RPP1A:RPL13:RPS16A:TEM1:RPS1:RPL6:ARX1:C1_03370W_A:C1_03620C_A:C1_03790C_A:RPP1:C1_04180W_A:C1_04370C_A:C1_04820C_A:MRPL37:PSF2:C1_05230W_A:C1_05630C_A:C1_05720W_A:C1_06070W_A:RPS14B:RPS22A:C1_06470W_A:C1_06540C_A:C1_06630W_A:C1_06760C_A:C1_0…	5666:5655:9986:118:45254:5720:51286:5881:70210:5759:71563:1990023:5688:30685:5887:32153:5662:22627:42272:1990707:8541:1990131:1990726:31389:5719:33255:930:31982:1990904:34515:18444:5853:812:1902716:31021:794:1990861:5663:34245:5875:811:120105:61496:783:776:34455:178:71957:62040:5761:131:16586:5938:1990334:34456:34388:1990879:10494:31391:1903754:778:32160:110085:5658:120155:324:5815:5762:16459:427…
15934	large ribosomal subunit	73 out of 1035 genes, 7.1%	100 out of 6473 background genes, 1.5%	9.34e-35	0	RPL16A:C1_01580W_A:MRP20:C1_02330C_A:RPL10:RPP1A:RPL13:RPL6:MRPL37:C1_05720W_A:C1_06470W_A:C1_06890C_A:MRPL3:C1_08520C_A:RPL42:RPL29:RPL37B:RPL27A:RPL14:RPL38:C2_01030W_A:C2_01740C_A:C2_03560C_A:RPL21A:C2_03950W_A:RPL39:RPL17B:C2_04700C_A:MRPL10:C2_05160C_A:C2_05410W_A:C2_05710C_A:RPL11:C2_07030C_A:C2_07190C_A:C2_07680W_A:MRPL33:RPL12:RPL9B:RPL19A:RPP2B:RPL35:RPL18:RPL8B:C3_06240C_A:RPL20B:C4_034…	9986:5761:324:5762:30686:5737:30446:5829:5730:42645:22625:5840:30687:30445:16020:5634:5576:15934:5622:32040
22626	cytosolic ribosome	63 out of 1035 genes, 6.1%	86 out of 6473 background genes, 1.3%	6.91e-30	0	RPL16A:RPS21B:RPS21:RPS42:C1_02330C_A:C1_02430C_A:RPL10:RPP1A:RPL13:RPS1:RPL6:C1_05720W_A:RPS22A:C1_06470W_A:C1_06890C_A:RPL42:RPL29:RPL37B:RPL27A:RPL14:RPL38:RPL21A:RPS9B:RPL39:RPL17B:C2_05410W_A:C2_05710C_A:RPL11:RPL12:RPL9B:RPL19A:RPP2B:RPL35:RPL18:RPS19A:RPL8B:YST1:RPS12:RPS6A:RPL20B:C4_04390W_A:RPL24A:RPL30:C4_06850C_A:UBI3:C5_01540W_A:RPS5:RPS25B:RPL43A:RPS13:RPL32:RPL25:RPL23A:RPL10A:RPS28…	9986:22627:62040:10494:5737:22626:30446:5829:5730:22625:5840:30688:30687:30445:15935:16020:5634:5576:15934:5622:32040:16021
22625	cytosolic large ribosomal subunit	41 out of 1035 genes, 4.0%	50 out of 6473 background genes, 0.8%	2.94e-22	0	RPL16A:C1_02330C_A:RPL10:RPP1A:RPL13:RPL6:C1_05720W_A:C1_06470W_A:C1_06890C_A:RPL42:RPL29:RPL37B:RPL27A:RPL14:RPL38:RPL21A:RPL39:RPL17B:C2_05410W_A:C2_05710C_A:RPL11:RPL12:RPL9B:RPL19A:RPP2B:RPL35:RPL18:RPL8B:RPL20B:C4_04390W_A:RPL24A:RPL30:RPL43A:RPL32:RPL25:RPL23A:RPL10A:RPL5:RPL28:RPL15A:RPP2A	9986:5737:30446:5829:22625:5840:30687:30445:16020:5634:5576:15934:5622:32040
44445	cytosolic part	74 out of 1035 genes, 7.1%	145 out of 6473 background genes, 2.2%	1.73e-20	0	RPL16A:RPS21B:RPS21:RPS42:C1_02330C_A:C1_02430C_A:RPL10:RPP1A:RPL13:RPS1:RPL6:C1_05720W_A:RPS22A:C1_06470W_A:C1_06890C_A:RPL42:RPL29:RPL37B:RPL27A:RPL14:RPL38:RNR21:RPL21A:RPS9B:RPL39:RPL17B:C2_05410W_A:C2_05710C_A:RPL11:C2_08930W_A:CCT2:RPL12:RPL9B:RPL19A:RPP2B:RPL35:RPL18:RPS19A:RPL8B:YST1:RPS12:RPS6A:C4_01500W_A:RPL20B:C4_02780W_A:C4_04390W_A:RPL24A:RPL30:C4_06850C_A:C4_06880C_A:UBI3:C5_01540W…	9986:22627:8541:2144:34515:62040:10494:5741:5737:70390:62092:22626:72380:30446:5829:97361:5730:22625:5971:5840:30688:30687:5832:30445:15935:48471:16020:5634:5576:790:15934:5622:32040:16021:34399
313	organellar ribosome	50 out of 1035 genes, 4.8%	84 out of 6473 background genes, 1.3%	3.58e-17	0	C1_01580W_A:MRP20:C1_01680C_A:C1_04370C_A:MRPL37:C1_06070W_A:MRPL3:C1_08520C_A:C1_08920W_A:C1_10470W_A:MRPS9:C2_01030W_A:C2_01740C_A:C2_02270C_A:C2_03560C_A:C2_03950W_A:C2_04790C_A:MRPL10:C2_05300C_A:C2_07030C_A:C2_07190C_A:C2_07680W_A:C2_07800W_A:MRPL33:C3_01850W_A:C3_06240C_A:C3_07390C_A:C4_00660W_A:C4_03410W_A:C4_04820C_A:MRP17:C5_00820W_A:C5_01050C_A:C5_01700W_A:C5_03410C_A:C5_04530W_A:C6_023…	5761:324:5762:5763:42645:329:5840:15935:15934:5622:61671:5739:32592
5761	mitochondrial ribosome	50 out of 1035 genes, 4.8%	84 out of 6473 background genes, 1.3%	3.58e-17	0	C1_01580W_A:MRP20:C1_01680C_A:C1_04370C_A:MRPL37:C1_06070W_A:MRPL3:C1_08520C_A:C1_08920W_A:C1_10470W_A:MRPS9:C2_01030W_A:C2_01740C_A:C2_02270C_A:C2_03560C_A:C2_03950W_A:C2_04790C_A:MRPL10:C2_05300C_A:C2_07030C_A:C2_07190C_A:C2_07680W_A:C2_07800W_A:MRPL33:C3_01850W_A:C3_06240C_A:C3_07390C_A:C4_00660W_A:C4_03410W_A:C4_04820C_A:MRP17:C5_00820W_A:C5_01050C_A:C5_01700W_A:C5_03410C_A:C5_04530W_A:C6_023…	5761:324:5762:5763:42645:329:5840:15935:15934:5622:61671:5739:32592
15935	small ribosomal subunit	41 out of 1035 genes, 4.0%	64 out of 6473 background genes, 1.0%	1.74e-15	0	RPS21B:RPS21:RPS42:C1_01680C_A:C1_02430C_A:RPS1:C1_04370C_A:C1_06070W_A:RPS22A:C1_08920W_A:C1_10470W_A:MRPS9:C2_02270C_A:RPS9B:C2_04790C_A:C2_05300C_A:C3_01850W_A:RPS15:RPS19A:YST1:RPS12:C3_07390C_A:C4_00660W_A:RPS6A:UBI3:MRP17:C5_01540W_A:RPS5:RPS25B:C5_04530W_A:RPS13:C6_02370C_A:C6_03730C_A:RPS28B:C7_01020C_A:CR_02950C_A:CR_04140W_A:RPS3:RPS27:RPS20:CR_08480C_A	9986:22627:62040:10494:22626:30446:5730:5763:5840:30688:30445:15935:16020:5576:5622:32040:16021:5739
44446	intracellular organelle part	470 out of 1035 genes, 45.4%	2176 out of 6473 background genes, 33.6%	2.21e-15	0	RPL16A:CDC13:TUB2:C1_00810W_A:RRS1:RPB11:CDC5:C1_01160C_A:RPS21B:RPS21:C1_01580W_A:MRP20:RPS42:C1_01680C_A:LSC1:ABP140:SEP7:C1_02310C_A:C1_02330C_A:TIM21:C1_02430C_A:RPL10:C1_02510W_A:TOM20:RPP1A:RPL13:TEM1:RPS1:RPL6:ARX1:C1_03370W_A:C1_03790C_A:RPP1:ELA1:C1_03830C_A:SEN15:C1_03940W_A:C1_04120C_A:C1_04180W_A:SSA2:C1_04370C_A:ERG3:MRPL37:ARG2:PSF2:C1_05230W_A:SSH1:C1_05630C_A:C1_05660C_A:C1_05720W…	5666:5669:5684:276:5655:9986:118:5744:45254:5720:51286:5881:70210:5759:71563:1990023:5688:30685:32153:5887:1990871:43541:5662:22627:42272:1990707:46695:5681:5797:8541:1990131:71020:1990726:31389:5719:33255:930:32865:31982:1990904:34515:71008:5784:812:139:1902716:5789:31021:794:5663:34245:42406:5875:811:120105:8023:61496:783:32301:776:34455:178:71957:5761:62040:124:131:5794:16586:5938:1990334:3445…
30684	preribosome	63 out of 1035 genes, 6.1%	132 out of 6473 background genes, 2.0%	2.73e-15	0	RPL16A:RRS1:RPS21:C1_02450C_A:ARX1:C1_04710C_A:REI1:RPS14B:C1_10880W_A:RPL37B:KRR1:CSI2:RPL27A:DIM1:C1_14080W_A:C2_02710C_A:RPS9B:RPL17B:C2_04700C_A:C2_05160C_A:MAK16:C2_06850W_A:NOC4:UTP15:RRP15:C2_09660W_A:UTP8:RPS7A:C3_02040C_A:C3_04380C_A:RPL35:NOG1:C3_06760W_A:NOP13:RLP24:RPS6A:NAN1:ECM1:C4_05330C_A:UTP13:CKB2:C5_03920C_A:C5_04840C_A:C5_04910W_A:NOP5:CIC1:RPL25:NIP7:MRT4:NOG2:NOP15:C7_01030C…	9986:30685:22627:34455:62040:34456:34388:30686:5737:32545:30446:5829:5730:5956:30692:22625:5840:30688:30687:30445:15935:31428:16020:5634:5576:5654:15934:5622:30684:33553:32040:46540:34457:34399
44422	organelle part	470 out of 1035 genes, 45.4%	2191 out of 6473 background genes, 33.8%	1.02e-14	0	RPL16A:CDC13:TUB2:C1_00810W_A:RRS1:RPB11:CDC5:C1_01160C_A:RPS21B:RPS21:C1_01580W_A:MRP20:RPS42:C1_01680C_A:LSC1:ABP140:SEP7:C1_02310C_A:C1_02330C_A:TIM21:C1_02430C_A:RPL10:C1_02510W_A:TOM20:RPP1A:RPL13:TEM1:RPS1:RPL6:ARX1:C1_03370W_A:C1_03790C_A:RPP1:ELA1:C1_03830C_A:SEN15:C1_03940W_A:C1_04120C_A:C1_04180W_A:SSA2:C1_04370C_A:ERG3:MRPL37:ARG2:PSF2:C1_05230W_A:SSH1:C1_05630C_A:C1_05660C_A:C1_05720W…	5666:5669:5684:276:5655:9986:118:5744:45254:5720:51286:5881:70210:5759:71563:1990023:5688:30685:32153:5887:1990871:43541:5662:22627:42272:1990707:46695:5681:5797:8541:1990131:71020:1990726:31389:5719:33255:930:32865:31982:1990904:34515:71008:5784:812:139:1902716:5789:31021:794:5663:34245:42406:5875:811:120105:8023:61496:783:32301:776:34455:178:71957:5761:62040:124:131:5794:16586:5938:1990334:3445…
31974	membrane-enclosed lumen	265 out of 1035 genes, 25.6%	1054 out of 6473 background genes, 16.3%	1.04e-14	0	CDC13:RRS1:RPB11:CDC5:C1_01160C_A:C1_01580W_A:MRP20:C1_01680C_A:LSC1:C1_02310C_A:ARX1:C1_03790C_A:RPP1:ELA1:C1_03830C_A:C1_04370C_A:ERG3:MRPL37:ARG2:PSF2:C1_05230W_A:C1_05630C_A:C1_06070W_A:C1_06540C_A:C1_06630W_A:C1_06760C_A:C1_07280C_A:C1_07490C_A:LHP1:C1_07630W_A:C1_07690C_A:MRPL3:C1_08160W_A:C1_08520C_A:C1_08920W_A:C1_08970W_A:C1_09620C_A:DAM1:C1_09840C_A:HCM1:RPA34:C1_10330C_A:C1_10470W_A:LK…	5666:5669:9986:5655:118:45254:5720:5881:70210:5759:1990023:5688:30685:32153:5662:22627:42272:1990707:46695:8541:1990131:1990726:5719:33255:1990904:34515:812:794:34245:811:120105:8023:783:776:34455:178:5761:124:16586:34456:34388:61957:1990879:10494:778:31965:5658:324:5762:35267:31429:16514:1990429:44732:30686:922:5641:5737:5847:34967:32221:30880:5736:97431:51233:5868:817:32545:31934:42729:30428:31…
43233	organelle lumen	265 out of 1035 genes, 25.6%	1054 out of 6473 background genes, 16.3%	1.04e-14	0	CDC13:RRS1:RPB11:CDC5:C1_01160C_A:C1_01580W_A:MRP20:C1_01680C_A:LSC1:C1_02310C_A:ARX1:C1_03790C_A:RPP1:ELA1:C1_03830C_A:C1_04370C_A:ERG3:MRPL37:ARG2:PSF2:C1_05230W_A:C1_05630C_A:C1_06070W_A:C1_06540C_A:C1_06630W_A:C1_06760C_A:C1_07280C_A:C1_07490C_A:LHP1:C1_07630W_A:C1_07690C_A:MRPL3:C1_08160W_A:C1_08520C_A:C1_08920W_A:C1_08970W_A:C1_09620C_A:DAM1:C1_09840C_A:HCM1:RPA34:C1_10330C_A:C1_10470W_A:LK…	5666:5669:9986:5655:118:45254:5720:5881:70210:5759:1990023:5688:30685:32153:5662:22627:42272:1990707:46695:8541:1990131:1990726:5719:33255:1990904:34515:812:794:34245:811:120105:8023:783:776:34455:178:5761:124:16586:34456:34388:61957:1990879:10494:778:31965:5658:324:5762:35267:31429:16514:1990429:44732:30686:922:5641:5737:5847:34967:32221:30880:5736:97431:51233:5868:817:32545:31934:42729:30428:31…
70013	intracellular organelle lumen	265 out of 1035 genes, 25.6%	1054 out of 6473 background genes, 16.3%	1.04e-14	0	CDC13:RRS1:RPB11:CDC5:C1_01160C_A:C1_01580W_A:MRP20:C1_01680C_A:LSC1:C1_02310C_A:ARX1:C1_03790C_A:RPP1:ELA1:C1_03830C_A:C1_04370C_A:ERG3:MRPL37:ARG2:PSF2:C1_05230W_A:C1_05630C_A:C1_06070W_A:C1_06540C_A:C1_06630W_A:C1_06760C_A:C1_07280C_A:C1_07490C_A:LHP1:C1_07630W_A:C1_07690C_A:MRPL3:C1_08160W_A:C1_08520C_A:C1_08920W_A:C1_08970W_A:C1_09620C_A:DAM1:C1_09840C_A:HCM1:RPA34:C1_10330C_A:C1_10470W_A:LK…	5666:5669:9986:5655:118:45254:5720:5881:70210:5759:1990023:5688:30685:32153:5662:22627:42272:1990707:46695:8541:1990131:1990726:5719:33255:1990904:34515:812:794:34245:811:120105:8023:783:776:34455:178:5761:124:16586:34456:34388:61957:1990879:10494:778:31965:5658:324:5762:35267:31429:16514:1990429:44732:30686:922:5641:5737:5847:34967:32221:30880:5736:97431:51233:5868:817:32545:31934:42729:30428:31…
44424	intracellular part	662 out of 1035 genes, 64.0%	3370 out of 6473 background genes, 52.1%	1.15e-14	0	RPL16A:CDC13:CNS1:TUB2:ERG2:C1_00810W_A:NRM1:RRS1:RPB11:CDC5:HMT1:C1_01160C_A:ZCF17:TIF:RPS21B:RPS21:C1_01580W_A:MRP20:RPS42:C1_01680C_A:LSC1:C1_01860W_A:CYS4:C1_01940C_A:SHA3:ABP140:SEP7:C1_02290C_A:C1_02310C_A:C1_02330C_A:TIM21:C1_02430C_A:C1_02450C_A:RPL10:C1_02500W_A:C1_02510W_A:TOM20:C1_02850W_A:RPP1A:RPL13:RPS16A:TEM1:RPS1:RPL6:C1_03180W_A:ARX1:RLI1:C1_03370W_A:C1_03620C_A:C1_03790C_A:RPP1:…	5666:5669:5684:276:5655:9986:118:5744:45254:46658:5720:51286:5881:70210:5759:71563:1990023:5688:30685:5887:32153:1990871:43541:42597:5662:22627:42272:1990707:46695:5681:5797:8541:2144:1990131:71020:1990726:5950:31389:5719:33255:930:32865:31982:1990904:34515:30015:71008:31251:18444:5784:5853:812:139:1902716:5789:31021:31415:794:1990861:5663:34245:42406:5875:811:120105:8023:61496:783:32301:48500:77…
5730	nucleolus	99 out of 1035 genes, 9.6%	271 out of 6473 background genes, 4.2%	1.33e-14	0	RRS1:ARX1:C1_03790C_A:RPP1:C1_06540C_A:LHP1:C1_08970W_A:RPA34:C1_10880W_A:C1_11000C_A:KRR1:CSI2:C1_12350W_A:C1_12680W_A:C1_12820C_A:C1_12990W_A:C1_13000W_A:C1_13040C_A:C1_13500C_A:C1_14080W_A:C2_01070W_A:CLB2:C2_02080W_A:C2_02630W_A:C2_02710C_A:C2_04700C_A:C2_05080C_A:RPF2:RPC40:C2_05600W_A:MAK16:RPA12:NOC4:UTP15:C2_09160W_A:C2_09660W_A:UTP8:C3_02040C_A:C3_02840W_A:C3_04380C_A:C3_05860C_A:NOG1:NO…	5666:5655:1990023:5688:30685:32153:22627:42272:1990707:1990726:1990904:120105:776:34455:178:34456:34388:778:31429:44732:30686:5737:30880:5736:32545:31934:30428:1990251:120:177:5829:5730:30869:5956:30692:5816:5826:70860:5840:932:5635:30688:72687:5697:31618:30687:5935:172:5819:31428:16020:5634:176:1902377:5654:5732:790:15934:5622:30684:5665:30677:33553:32040:5844:72686:46540:34457:5643:34399:781
5622	intracellular	666 out of 1035 genes, 64.3%	3407 out of 6473 background genes, 52.6%	3.21e-14	0	RPL16A:CDC13:CNS1:TUB2:ERG2:C1_00810W_A:NRM1:RRS1:RPB11:CDC5:HMT1:C1_01160C_A:ZCF17:TIF:RPS21B:RPS21:C1_01580W_A:MRP20:RPS42:C1_01680C_A:LSC1:C1_01860W_A:CYS4:C1_01940C_A:SHA3:ABP140:SEP7:C1_02290C_A:C1_02310C_A:C1_02330C_A:TIM21:C1_02430C_A:C1_02450C_A:RPL10:C1_02500W_A:C1_02510W_A:TOM20:C1_02850W_A:YPT7:RPP1A:RPL13:RPS16A:TEM1:RPS1:RPL6:C1_03180W_A:ARX1:RLI1:C1_03370W_A:C1_03620C_A:C1_03790C_A:…	5666:5669:5684:276:5655:9986:118:5744:45254:46658:5720:51286:5881:70210:5759:71563:1990023:5688:30685:5887:32153:1990871:43541:42597:5662:22627:42272:1990707:46695:5681:5797:8541:2144:1990131:71020:1990726:5950:31389:5719:33255:930:32865:31982:1990904:34515:30015:71008:31251:18444:5784:5853:812:139:1902716:5789:31021:31415:794:1990861:5663:34245:42406:5875:811:120105:8023:61496:783:32301:48500:77…
43229	intracellular organelle	584 out of 1035 genes, 56.4%	2961 out of 6473 background genes, 45.7%	1.65e-11	0	RPL16A:CDC13:TUB2:ERG2:C1_00810W_A:NRM1:RRS1:RPB11:CDC5:HMT1:C1_01160C_A:ZCF17:TIF:RPS21B:RPS21:C1_01580W_A:MRP20:RPS42:C1_01680C_A:LSC1:C1_01860W_A:CYS4:SHA3:ABP140:SEP7:C1_02290C_A:C1_02310C_A:C1_02330C_A:TIM21:C1_02430C_A:C1_02450C_A:RPL10:C1_02500W_A:C1_02510W_A:TOM20:C1_02850W_A:RPP1A:RPL13:RPS16A:TEM1:RPS1:RPL6:ARX1:RLI1:C1_03370W_A:C1_03620C_A:C1_03790C_A:RPP1:ELA1:C1_03830C_A:SEN15:C1_039…	5666:5669:5684:276:5655:9986:118:5744:45254:46658:5720:51286:5881:70210:5759:71563:1990023:5688:30685:32153:5887:1990871:43541:42597:5662:22627:42272:1990707:46695:5681:5797:8541:1990131:71020:1990726:31389:5719:33255:930:32865:31982:1990904:34515:30015:71008:18444:5784:5853:812:139:1902716:5789:31021:794:1990861:5663:34245:42406:5875:811:120105:8023:61496:783:32301:776:34455:178:71957:5761:62040…
44464	cell part	711 out of 1035 genes, 68.7%	3782 out of 6473 background genes, 58.4%	3.68e-11	0	RPL16A:CDC13:CNS1:TUB2:ERG2:C1_00810W_A:NRM1:RRS1:RPB11:CDC5:HMT1:C1_01160C_A:ZCF17:TIF:RPS21B:RPS21:C1_01580W_A:MRP20:RPS42:C1_01680C_A:LSC1:C1_01860W_A:CYS4:C1_01940C_A:SHA3:ABP140:SEP7:C1_02290C_A:C1_02310C_A:C1_02330C_A:TIM21:C1_02430C_A:C1_02450C_A:RPL10:C1_02500W_A:C1_02510W_A:TOM20:C1_02850W_A:YPT7:RPP1A:RPL13:RPS16A:TEM1:RPS1:RPL6:C1_03180W_A:ECM33:ARX1:RLI1:C1_03370W_A:C1_03620C_A:C1_037…	5666:5669:5684:276:5655:9986:118:5744:45254:46658:5720:51286:5881:70210:5759:71563:1990023:5688:30685:5887:32153:1990871:43541:42597:5662:22627:42272:1990707:46695:5681:5797:8541:2144:1990131:71020:1990726:5950:31389:5719:33255:930:32865:31982:1990904:34515:30015:71008:31251:18444:31520:5784:5853:812:139:1902716:5789:31021:31415:794:1990861:5663:34245:42406:5875:811:120105:8023:61496:783:32301:48…
5623	cell	711 out of 1035 genes, 68.7%	3782 out of 6473 background genes, 58.4%	3.68e-11	0	RPL16A:CDC13:CNS1:TUB2:ERG2:C1_00810W_A:NRM1:RRS1:RPB11:CDC5:HMT1:C1_01160C_A:ZCF17:TIF:RPS21B:RPS21:C1_01580W_A:MRP20:RPS42:C1_01680C_A:LSC1:C1_01860W_A:CYS4:C1_01940C_A:SHA3:ABP140:SEP7:C1_02290C_A:C1_02310C_A:C1_02330C_A:TIM21:C1_02430C_A:C1_02450C_A:RPL10:C1_02500W_A:C1_02510W_A:TOM20:C1_02850W_A:YPT7:RPP1A:RPL13:RPS16A:TEM1:RPS1:RPL6:C1_03180W_A:ECM33:ARX1:RLI1:C1_03370W_A:C1_03620C_A:C1_037…	5666:5669:5684:276:5655:9986:118:5744:45254:46658:5720:51286:5881:70210:5759:71563:1990023:5688:30685:5887:32153:1990871:43541:42597:5662:22627:42272:1990707:46695:5681:5797:8541:2144:1990131:71020:1990726:5950:31389:5719:33255:930:32865:31982:1990904:34515:30015:71008:31251:18444:31520:5784:5853:812:139:1902716:5789:31021:31415:794:1990861:5663:34245:42406:5875:811:120105:8023:61496:783:32301:48…
43226	organelle	584 out of 1035 genes, 56.4%	2971 out of 6473 background genes, 45.9%	3.78e-11	0	RPL16A:CDC13:TUB2:ERG2:C1_00810W_A:NRM1:RRS1:RPB11:CDC5:HMT1:C1_01160C_A:ZCF17:TIF:RPS21B:RPS21:C1_01580W_A:MRP20:RPS42:C1_01680C_A:LSC1:C1_01860W_A:CYS4:SHA3:ABP140:SEP7:C1_02290C_A:C1_02310C_A:C1_02330C_A:TIM21:C1_02430C_A:C1_02450C_A:RPL10:C1_02500W_A:C1_02510W_A:TOM20:C1_02850W_A:RPP1A:RPL13:RPS16A:TEM1:RPS1:RPL6:ARX1:RLI1:C1_03370W_A:C1_03620C_A:C1_03790C_A:RPP1:ELA1:C1_03830C_A:SEN15:C1_039…	5666:5669:5684:276:5655:9986:118:5744:45254:46658:5720:51286:5881:70210:5759:71563:1990023:5688:30685:32153:5887:1990871:43541:42597:5662:22627:42272:1990707:46695:5681:5797:8541:1990131:71020:1990726:31389:5719:33255:930:32865:31982:1990904:34515:30015:71008:18444:5784:5853:812:139:1902716:5789:31021:794:1990861:5663:34245:42406:5875:811:120105:8023:61496:783:32301:776:34455:178:71957:5761:62040…
44428	nuclear part	240 out of 1035 genes, 23.2%	992 out of 6473 background genes, 15.3%	7.59e-11	0	CDC13:RRS1:RPB11:CDC5:C1_01160C_A:C1_02310C_A:ARX1:C1_03370W_A:C1_03790C_A:RPP1:ELA1:C1_03830C_A:SEN15:C1_04120C_A:PSF2:C1_05230W_A:C1_05630C_A:C1_05660C_A:C1_06540C_A:C1_06630W_A:C1_06760C_A:C1_07280C_A:C1_07490C_A:LHP1:C1_07690C_A:C1_07850C_A:C1_08160W_A:C1_08890C_A:C1_08970W_A:NUP188:DAM1:C1_09840C_A:HCM1:BUD31:C1_10080W_A:NTF2:RPA34:C1_10330C_A:C1_10880W_A:C1_11000C_A:FGR16:TOS4:KRR1:C1_11910…	5666:5669:9986:5684:5655:118:5720:5881:70210:5759:1990023:5688:30685:32153:5662:22627:42272:1990707:46695:5681:8541:1990131:71020:1990726:5719:33255:1990904:34515:71008:812:5789:794:34245:811:120105:8023:61496:783:32301:776:34455:178:124:16586:34456:34388:5685:5680:1990879:5637:10494:5741:778:31965:5658:35267:31429:16514:5825:1990429:44732:30686:922:5641:71004:5737:5847:34967:32221:30880:70390:57…
315	organellar large ribosomal subunit	29 out of 1035 genes, 2.8%	47 out of 6473 background genes, 0.7%	6.21e-10	0	C1_01580W_A:MRP20:MRPL37:MRPL3:C1_08520C_A:C2_01030W_A:C2_01740C_A:C2_03560C_A:C2_03950W_A:MRPL10:C2_07030C_A:C2_07190C_A:C2_07680W_A:MRPL33:C3_06240C_A:C4_03410W_A:C4_04820C_A:C5_00820W_A:C5_01050C_A:C5_01700W_A:C5_03410C_A:YML6:C7_02120C_A:C7_03000C_A:MRP7:MRPL6:MRPL40:CR_05150W_A:CR_07320C_A	5761:324:5762:42645:5840:15934:5622
5762	mitochondrial large ribosomal subunit	29 out of 1035 genes, 2.8%	47 out of 6473 background genes, 0.7%	6.21e-10	0	C1_01580W_A:MRP20:MRPL37:MRPL3:C1_08520C_A:C2_01030W_A:C2_01740C_A:C2_03560C_A:C2_03950W_A:MRPL10:C2_07030C_A:C2_07190C_A:C2_07680W_A:MRPL33:C3_06240C_A:C4_03410W_A:C4_04820C_A:C5_00820W_A:C5_01050C_A:C5_01700W_A:C5_03410C_A:YML6:C7_02120C_A:C7_03000C_A:MRP7:MRPL6:MRPL40:CR_05150W_A:CR_07320C_A	5761:324:5762:42645:5840:15934:5622
98798	mitochondrial protein complex	72 out of 1035 genes, 7.0%	204 out of 6473 background genes, 3.2%	2.51e-09	0	C1_01580W_A:MRP20:C1_01680C_A:TIM21:TOM20:C1_04370C_A:MRPL37:C1_06070W_A:C1_06640C_A:ATP7:MRPL3:C1_08520C_A:C1_08920W_A:COX5:C1_10470W_A:MRPS9:ATP20:C2_01030W_A:C2_01740C_A:C2_02120W_A:C2_02270C_A:COX6:C2_03560C_A:C2_03950W_A:SUV3:C2_04790C_A:MDM10:MRPL10:C2_05300C_A:C2_07030C_A:C2_07190C_A:C2_07680W_A:C2_07800W_A:TIM23:MRPL33:C3_01850W_A:PAM17:SAM50:C3_06240C_A:C3_07390C_A:C4_00660W_A:TIM10:C4_0…	276:5744:45254:5759:32865:34245:5761:5741:324:5762:1401:5742:5829:5747:45025:42721:5763:42645:31966:329:5967:5750:5840:19867:275:5751:42719:15935:262:5634:5886:790:15934:31307:5622:5743:5740:274:16021:61671:1405:5758:5739:32592
31981	nuclear lumen	186 out of 1035 genes, 18.0%	755 out of 6473 background genes, 11.7%	1.69e-08	0	CDC13:RRS1:RPB11:CDC5:C1_01160C_A:C1_02310C_A:ARX1:C1_03790C_A:RPP1:ELA1:C1_03830C_A:PSF2:C1_05230W_A:C1_05630C_A:C1_06540C_A:C1_06630W_A:C1_06760C_A:C1_07280C_A:C1_07490C_A:LHP1:C1_07690C_A:C1_08160W_A:C1_08970W_A:DAM1:C1_09840C_A:HCM1:RPA34:C1_10330C_A:C1_10880W_A:C1_11000C_A:TOS4:KRR1:CSI2:C1_12350W_A:C1_12680W_A:C1_12820C_A:C1_12990W_A:C1_13000W_A:C1_13040C_A:C1_13500C_A:DAD1:C1_14080W_A:C1_1…	5666:5669:5655:118:5720:5881:70210:5759:1990023:5688:30685:32153:5662:22627:42272:1990707:46695:8541:1990131:1990726:5719:33255:1990904:34515:812:794:34245:811:120105:8023:783:776:34455:178:124:16586:34456:34388:1990879:10494:778:31965:5658:35267:31429:16514:1990429:44732:30686:922:5737:5847:34967:32221:30880:5736:97431:51233:5868:817:32545:31934:42729:30428:31080:784:43596:1990251:120:34990:177:…
22627	cytosolic small ribosomal subunit	21 out of 1035 genes, 2.0%	30 out of 6473 background genes, 0.5%	2.35e-08	0	RPS21B:RPS21:RPS42:C1_02430C_A:RPS1:RPS22A:RPS9B:RPS19A:YST1:RPS12:RPS6A:UBI3:C5_01540W_A:RPS5:RPS25B:RPS13:RPS28B:RPS3:RPS27:RPS20:CR_08480C_A	9986:22627:62040:10494:22626:30446:5730:5840:30688:30445:15935:16020:5576:5622:32040:16021
44452	nucleolar part	48 out of 1035 genes, 4.6%	122 out of 6473 background genes, 1.9%	1.41e-07	0	RPP1:C1_08970W_A:RPA34:C1_10880W_A:C1_12820C_A:C1_12990W_A:C1_13000W_A:C1_13040C_A:C1_13500C_A:C1_14080W_A:C2_01070W_A:C2_02080W_A:C2_02630W_A:C2_02710C_A:RPC40:C2_05600W_A:RPA12:UTP15:UTP8:C3_02840W_A:C3_04380C_A:C4_00740W_A:C4_01580C_A:NAN1:C4_03040W_A:C4_05330C_A:C5_01160C_A:UTP13:CKB2:C5_02850W_A:RPO26:C5_04910W_A:NOP5:CDC14:POP4:CR_00460C_A:CR_01950W_A:RPC19:NHP2:RPB8:CR_05350W_A:CR_06600C_A…	5666:5655:1990023:30685:32153:120105:776:34455:34456:34388:778:31429:44732:30686:5737:30880:5736:32545:30428:120:5829:5730:30869:5956:5816:5826:70860:30688:5697:172:31428:16020:5634:5654:5622:5665:30677:33553:32040:72686:46540:34457
5759	mitochondrial matrix	69 out of 1035 genes, 6.7%	211 out of 6473 background genes, 3.3%	3.44e-07	0	C1_01580W_A:MRP20:C1_01680C_A:LSC1:C1_04370C_A:MRPL37:ARG2:C1_06070W_A:C1_07630W_A:MRPL3:C1_08520C_A:C1_08920W_A:C1_09620C_A:C1_10470W_A:MRPS9:C1_13790C_A:C1_14090W_A:C2_01030W_A:C2_01740C_A:C2_02120W_A:C2_02270C_A:C2_03560C_A:C2_03950W_A:SUV3:C2_04790C_A:MRPL10:C2_05300C_A:COQ5:C2_07030C_A:C2_07190C_A:C2_07680W_A:C2_07800W_A:C3_00340W_A:MRPL33:C3_01850W_A:PAM17:YAH1:C3_06240C_A:C3_07390C_A:C4_00…	45254:5759:34245:5761:324:5762:5737:5829:45025:5763:42645:329:5967:5840:15935:262:5634:5886:790:15934:5622:5743:31314:61671:1405:5758:5739:32592
30687	preribosome, large subunit precursor	27 out of 1035 genes, 2.6%	51 out of 6473 background genes, 0.8%	4.82e-07	0	RRS1:C1_02450C_A:ARX1:C1_04710C_A:REI1:RPL37B:CSI2:RPL17B:C2_05160C_A:MAK16:RRP15:C2_09660W_A:C3_02040C_A:RPL35:NOG1:C3_06760W_A:RLP24:ECM1:CIC1:RPL25:NIP7:MRT4:NOG2:NOP15:RPL7:CR_07080W_A:DRS1	9986:5737:5730:22625:5840:30688:30687:5634:5576:5654:15934:5622:34399
5666	RNA polymerase III complex	14 out of 1035 genes, 1.4%	17 out of 6473 background genes, 0.3%	1.23e-06	0	C1_05230W_A:C1_12820C_A:RPC40:RPC11:RPC53:C4_03040W_A:RPO26:C5_04990W_A:C6_03210C_A:C7_01210C_A:RPC19:RPC31:CR_02890C_A:RPB8	5666:30880:5736:5829:5634:790:5665:5739
5829	cytosol	114 out of 1035 genes, 11.0%	429 out of 6473 background genes, 6.6%	2.04e-06	0	RPL16A:C1_00810W_A:TIF:RPS21B:RPS21:RPS42:CYS4:C1_02330C_A:C1_02430C_A:RPL10:C1_02850W_A:RPP1A:RPL13:RPS1:RPL6:RPP1:SSA2:C1_05720W_A:RPS22A:C1_06470W_A:C1_06890C_A:C1_07280C_A:RPL42:RPL29:RPL37B:RPL27A:RPL14:RPL38:C2_01860C_A:C2_02000W_A:RNR21:RPL21A:RPS9B:RPL39:RPL17B:RHO3:C2_05220C_A:C2_05410W_A:C2_05710C_A:RPL11:SPE3:NOC4:C2_08930W_A:CCT2:GPD1:RPL12:RPL9B:RPL19A:RPP2B:RPL35:RPL18:RPS19A:RPL8B:…	5666:5669:5655:9986:45254:5720:51286:32153:43541:22627:46695:5797:8541:2144:31389:34515:5853:139:5663:42406:62040:124:5794:10494:5741:31391:35838:5737:5847:30880:70390:62092:22626:31080:72380:31390:30446:9331:5829:97361:97344:5730:439:5628:30692:42645:785:329:5967:22625:5971:33698:5840:932:5675:30688:5801:30687:172:5832:30445:15935:48471:16020:5634:5576:16281:5654:5886:790:15934:19898:5622:5777:1…
5634	nucleus	306 out of 1035 genes, 29.6%	1461 out of 6473 background genes, 22.6%	2.81e-06	0	CDC13:NRM1:RRS1:RPB11:CDC5:HMT1:C1_01160C_A:ZCF17:C1_01860W_A:SHA3:C1_02310C_A:C1_02450C_A:C1_02850W_A:ARX1:RLI1:C1_03370W_A:C1_03790C_A:RPP1:ELA1:C1_03830C_A:SEN15:C1_04120C_A:C1_04180W_A:PSF2:C1_05230W_A:C1_05630C_A:C1_05660C_A:C1_05800C_A:C1_06540C_A:C1_06630W_A:C1_06760C_A:C1_07280C_A:C1_07490C_A:LHP1:C1_07690C_A:C1_07850C_A:C1_07960W_A:C1_08160W_A:PCL2:C1_08890C_A:C1_08970W_A:NUP188:C1_09670…	5666:5669:9986:5684:5655:118:5720:51286:5881:70210:5759:1990023:5688:30685:32153:5662:22627:42272:1990707:46695:5681:8541:1990131:71020:1990726:31389:5719:33255:1990904:34515:30015:71008:5853:812:5789:139:794:5663:34245:811:120105:8023:61496:783:32301:776:34455:178:124:131:307:5794:16586:34456:34388:5685:5680:1990879:5637:10494:31391:5741:778:31965:5658:324:35267:31429:786:16514:5825:1990429:3583…
314	organellar small ribosomal subunit	19 out of 1035 genes, 1.8%	33 out of 6473 background genes, 0.5%	2.44e-05	0	C1_01680C_A:C1_04370C_A:C1_06070W_A:C1_08920W_A:C1_10470W_A:MRPS9:C2_02270C_A:C2_04790C_A:C2_05300C_A:C3_01850W_A:C3_07390C_A:C4_00660W_A:MRP17:C5_04530W_A:C6_02370C_A:C6_03730C_A:C7_01020C_A:CR_02950C_A:CR_04140W_A	5763:5840:15935:5739
5763	mitochondrial small ribosomal subunit	19 out of 1035 genes, 1.8%	33 out of 6473 background genes, 0.5%	2.44e-05	0	C1_01680C_A:C1_04370C_A:C1_06070W_A:C1_08920W_A:C1_10470W_A:MRPS9:C2_02270C_A:C2_04790C_A:C2_05300C_A:C3_01850W_A:C3_07390C_A:C4_00660W_A:MRP17:C5_04530W_A:C6_02370C_A:C6_03730C_A:C7_01020C_A:CR_02950C_A:CR_04140W_A	5763:5840:15935:5739
30532	small nuclear ribonucleoprotein complex	25 out of 1035 genes, 2.4%	57 out of 6473 background genes, 0.9%	0.00023	0	C1_04120C_A:C1_08890C_A:BUD31:FGR16:PRP39:PRP3:C2_03880C_A:SMD2:C2_06790W_A:C3_04380C_A:C3_05540C_A:C3_05940C_A:LEA1:C5_00920W_A:SMD3:C5_03110C_A:C5_03400C_A:C6_00530C_A:C7_02510W_A:LSM6:CR_01700C_A:PRP42:SNP3:SMX4:CR_07510W_A	5684:5688:5681:1990726:5685:71004:5737:30532:5730:243:932:71014:5686:974:5682:31428:5634:5732:32040:46540:70274:781
97525	spliceosomal snRNP complex	25 out of 1035 genes, 2.4%	57 out of 6473 background genes, 0.9%	0.00023	0	C1_04120C_A:C1_08890C_A:BUD31:FGR16:PRP39:PRP3:C2_03880C_A:SMD2:C2_06790W_A:C3_04380C_A:C3_05540C_A:C3_05940C_A:LEA1:C5_00920W_A:SMD3:C5_03110C_A:C5_03400C_A:C6_00530C_A:C7_02510W_A:LSM6:CR_01700C_A:PRP42:SNP3:SMX4:CR_07510W_A	5684:5688:5681:1990726:5685:71004:5737:30532:5730:243:932:71014:5686:974:5682:31428:5634:5732:32040:46540:70274:781
32040	small-subunit processome	23 out of 1035 genes, 2.2%	50 out of 6473 background genes, 0.8%	0.00023	0	RPL16A:RPS21:RPS14B:C1_10880W_A:KRR1:RPL27A:C1_14080W_A:RPS9B:NOC4:UTP15:UTP8:RPS7A:C3_04380C_A:RPS6A:NAN1:UTP13:C5_03920C_A:NOP5:CR_00460C_A:CR_03360W_A:IMP4:SIK1:UTP5	9986:22627:34455:34388:30686:30446:5829:5730:30692:22625:5840:30688:30445:15935:31428:16020:5634:15934:5622:33553:32040:46540:34457
5732	small nucleolar ribonucleoprotein complex	30 out of 1035 genes, 2.9%	77 out of 6473 background genes, 1.2%	0.00039	0	RPP1:C1_08970W_A:C1_12990W_A:C1_13000W_A:C1_13040C_A:RMP1:C1_13500C_A:C2_02080W_A:C2_05600W_A:C3_02840W_A:C3_04380C_A:C4_00740W_A:C4_01580C_A:C5_01160C_A:SNM1:C5_02850W_A:C5_03400C_A:NOP5:POP4:C7_02510W_A:LSM6:SNP3:NHP2:CR_05350W_A:CR_06600C_A:SMX4:NOP10:SIK1:CR_10460W_A:POP3	5655:5688:1990726:31429:5737:5829:5730:932:5697:172:31428:5634:5732:30677:32040:46540:781
120114	Sm-like protein family complex	25 out of 1035 genes, 2.4%	59 out of 6473 background genes, 0.9%	0.00051	0	C1_04120C_A:C1_08890C_A:BUD31:FGR16:PRP39:PRP3:C2_03880C_A:SMD2:C2_06790W_A:C3_04380C_A:C3_05540C_A:C3_05940C_A:LEA1:C5_00920W_A:SMD3:C5_03110C_A:C5_03400C_A:C6_00530C_A:C7_02510W_A:LSM6:CR_01700C_A:PRP42:SNP3:SMX4:CR_07510W_A	5684:5688:5681:1990726:5685:71004:5737:30532:5730:243:932:71014:5686:974:5682:31428:5634:5732:32040:46540:70274:781
5737	cytoplasm	436 out of 1035 genes, 42.1%	2310 out of 6473 background genes, 35.7%	0.00076	0	RPL16A:CNS1:TUB2:ERG2:C1_00810W_A:NRM1:C1_01160C_A:TIF:RPS21B:RPS21:C1_01580W_A:MRP20:RPS42:C1_01680C_A:LSC1:CYS4:C1_01940C_A:ABP140:SEP7:C1_02290C_A:C1_02330C_A:TIM21:C1_02430C_A:C1_02450C_A:RPL10:C1_02500W_A:C1_02510W_A:TOM20:C1_02850W_A:RPP1A:RPL13:RPS16A:RPS1:RPL6:C1_03180W_A:ARX1:RLI1:C1_03370W_A:C1_03620C_A:RPP1:C1_03830C_A:C1_03940W_A:BST1:SSA2:C1_04370C_A:ERG3:C1_04820C_A:C1_04840C_A:MRPL…	5666:5669:276:5655:9986:5744:45254:46658:5720:51286:5881:70210:5759:71563:1990023:5688:5887:32153:1990871:43541:42597:22627:42272:46695:5797:8541:2144:1990131:1990726:5950:31389:930:32865:31982:1990904:34515:30015:31251:18444:5784:5853:812:139:1902716:5789:31021:794:31415:1990861:5663:34245:42406:5875:120105:61496:48500:776:178:71957:5761:62040:124:5768:131:5794:5938:1990334:71261:61957:31305:563…
5736	RNA polymerase I complex	10 out of 1035 genes, 1.0%	13 out of 6473 background genes, 0.2%	0.00083	0	RPA34:C1_12820C_A:C2_01070W_A:RPC40:RPA12:C4_03040W_A:RPO26:CR_01950W_A:RPC19:RPB8	5666:30880:5736:5730:5634:5665
177	cytoplasmic exosome (RNase complex)	9 out of 1035 genes, 0.9%	12 out of 6473 background genes, 0.2%	0.00406	0	C1_01160C_A:C1_03830C_A:C1_06540C_A:C1_12350W_A:SUV3:C2_09160W_A:C4_02090C_A:RRP42:CR_02550C_A	178:5737:1990251:177:5730:45025:262:5634:176:5654:790:5739
5686	U2 snRNP	12 out of 1035 genes, 1.2%	20 out of 6473 background genes, 0.3%	0.00418	0	C1_04120C_A:C1_08890C_A:BUD31:C2_03880C_A:SMD2:C2_06790W_A:C3_05540C_A:LEA1:SMD3:C5_03110C_A:C6_00530C_A:CR_07510W_A	5684:5681:5685:71004:30532:243:71014:5686:974:5682:5634:46540:70274
46540	U4/U6 x U5 tri-snRNP complex	15 out of 1035 genes, 1.4%	30 out of 6473 background genes, 0.5%	0.00656	0	FGR16:PRP3:C2_03880C_A:SMD2:C3_04380C_A:C5_00920W_A:SMD3:C5_03110C_A:C5_03400C_A:C6_00530C_A:C7_02510W_A:LSM6:SNP3:SMX4:CR_07510W_A	5688:5681:1990726:5685:71004:5737:30532:5730:243:932:71014:5686:974:5682:31428:5732:32040:46540:781
97526	spliceosomal tri-snRNP complex	15 out of 1035 genes, 1.4%	30 out of 6473 background genes, 0.5%	0.00656	0	FGR16:PRP3:C2_03880C_A:SMD2:C3_04380C_A:C5_00920W_A:SMD3:C5_03110C_A:C5_03400C_A:C6_00530C_A:C7_02510W_A:LSM6:SNP3:SMX4:CR_07510W_A	5688:5681:1990726:5685:71004:5737:30532:5730:243:932:71014:5686:974:5682:31428:5732:32040:46540:781
172	ribonuclease MRP complex	7 out of 1035 genes, 0.7%	8 out of 6473 background genes, 0.1%	0.00799	0	RPP1:RMP1:C3_02840W_A:C4_00740W_A:SNM1:POP4:POP3	5655:5829:5697:172:5634:30677
178	exosome (RNase complex)	9 out of 1035 genes, 0.9%	13 out of 6473 background genes, 0.2%	0.01133	0	C1_01160C_A:C1_03830C_A:C1_06540C_A:C1_12350W_A:SUV3:C2_09160W_A:C4_02090C_A:RRP42:CR_02550C_A	178:5737:1990251:177:5730:45025:262:5634:176:5654:790:5739
176	nuclear exosome (RNase complex)	8 out of 1035 genes, 0.8%	11 out of 6473 background genes, 0.2%	0.0193	0	C1_01160C_A:C1_03830C_A:C1_06540C_A:C1_12350W_A:C2_09160W_A:C4_02090C_A:RRP42:CR_02550C_A	178:5737:1990251:177:5730:5634:176:5654:790
43231	intracellular membrane-bounded organelle	475 out of 1035 genes, 45.9%	2613 out of 6473 background genes, 40.4%	0.0212	0	CDC13:ERG2:C1_00810W_A:NRM1:RRS1:RPB11:CDC5:HMT1:C1_01160C_A:ZCF17:C1_01580W_A:MRP20:C1_01680C_A:LSC1:C1_01860W_A:SHA3:C1_02290C_A:C1_02310C_A:TIM21:C1_02450C_A:C1_02500W_A:C1_02510W_A:TOM20:C1_02850W_A:ARX1:RLI1:C1_03370W_A:C1_03790C_A:RPP1:ELA1:C1_03830C_A:SEN15:C1_03940W_A:C1_04120C_A:C1_04180W_A:BST1:SSA2:C1_04370C_A:ERG3:MRPL37:ARG2:PSF2:C1_05180C_A:C1_05190C_A:C1_05230W_A:SSH1:C1_05630C_A:C…	5666:5669:5684:276:9986:5655:118:5744:45254:46658:5720:51286:5881:70210:5759:71563:1990023:5688:30685:32153:5887:1990871:43541:42597:5662:22627:42272:1990707:46695:5681:5797:8541:1990131:71020:1990726:31389:5719:33255:32865:31982:1990904:34515:30015:71008:5784:5853:812:139:1902716:5789:794:5663:34245:42406:811:120105:8023:61496:783:32301:776:34455:178:5761:62040:124:131:307:5794:16586:34456:34388…
30880	RNA polymerase complex	26 out of 1035 genes, 2.5%	75 out of 6473 background genes, 1.2%	0.02355	0	RPB11:C1_05230W_A:C1_07280C_A:C1_07490C_A:RPA34:C1_12820C_A:C2_01070W_A:C2_02120W_A:RPC40:C2_07200W_A:RPA12:RPC11:TAF60:RPC53:C4_03040W_A:PRI2:RPO26:C5_04990W_A:C6_00640C_A:C6_03210C_A:C7_01210C_A:CR_01950W_A:RPC19:RPC31:CR_02890C_A:RPB8	5666:5669:5759:46695:34245:124:5658:30880:5736:5829:5730:439:5635:5675:112:5634:790:5665:5758:5739
428	DNA-directed RNA polymerase complex	26 out of 1035 genes, 2.5%	75 out of 6473 background genes, 1.2%	0.02355	0	RPB11:C1_05230W_A:C1_07280C_A:C1_07490C_A:RPA34:C1_12820C_A:C2_01070W_A:C2_02120W_A:RPC40:C2_07200W_A:RPA12:RPC11:TAF60:RPC53:C4_03040W_A:PRI2:RPO26:C5_04990W_A:C6_00640C_A:C6_03210C_A:C7_01210C_A:CR_01950W_A:RPC19:RPC31:CR_02890C_A:RPB8	5666:5669:5759:46695:34245:124:5658:30880:5736:5829:5730:439:5635:5675:112:5634:790:5665:5758:5739
44444	cytoplasmic part	371 out of 1035 genes, 35.8%	1987 out of 6473 background genes, 30.7%	0.0271	0	RPL16A:TUB2:ERG2:C1_00810W_A:C1_01160C_A:TIF:RPS21B:RPS21:C1_01580W_A:MRP20:RPS42:C1_01680C_A:LSC1:CYS4:C1_01940C_A:ABP140:SEP7:C1_02290C_A:C1_02330C_A:TIM21:C1_02430C_A:RPL10:C1_02500W_A:C1_02510W_A:TOM20:C1_02850W_A:RPP1A:RPL13:RPS16A:RPS1:RPL6:RLI1:C1_03370W_A:C1_03620C_A:RPP1:C1_03830C_A:C1_03940W_A:BST1:SSA2:C1_04370C_A:ERG3:C1_04820C_A:C1_04840C_A:MRPL37:ARG2:C1_05180C_A:C1_05190C_A:SSH1:C1…	5666:5669:276:5655:9986:5744:45254:46658:5720:51286:5881:5759:71563:1990023:5688:32153:5887:1990871:43541:42597:22627:46695:5797:8541:2144:1990131:1990726:5950:31389:930:32865:31982:1990904:34515:31251:18444:5784:5853:139:1902716:5789:31021:794:31415:1990861:5663:34245:42406:5875:120105:61496:48500:776:178:71957:5761:62040:124:5768:131:5794:5938:1990334:71261:61957:31305:5637:43291:10494:31391:57…
1905354	exoribonuclease complex	9 out of 1035 genes, 0.9%	14 out of 6473 background genes, 0.2%	0.02723	0	C1_01160C_A:C1_03830C_A:C1_06540C_A:C1_12350W_A:SUV3:C2_09160W_A:C4_02090C_A:RRP42:CR_02550C_A	178:5737:1990251:177:5730:45025:262:5634:176:5654:790:5739
55029	nuclear DNA-directed RNA polymerase complex	25 out of 1035 genes, 2.4%	73 out of 6473 background genes, 1.1%	0.041	0	RPB11:C1_05230W_A:C1_07280C_A:C1_07490C_A:RPA34:C1_12820C_A:C2_01070W_A:RPC40:C2_07200W_A:RPA12:RPC11:TAF60:RPC53:C4_03040W_A:PRI2:RPO26:C5_04990W_A:C6_00640C_A:C6_03210C_A:C7_01210C_A:CR_01950W_A:RPC19:RPC31:CR_02890C_A:RPB8	5666:5669:46695:124:5658:30880:5736:5829:5730:439:5635:5675:112:5634:790:5665:5739

## Sheet: Part 4
Supplementary Table 2 Results of the gene set enrichment analysis
Part 4 – QMY23 strain MSB treated vs. QMY23 strain untreated
Upregulated gene set
Biological process
GOID	GO_term	Cluster frequency	Background frequency	Corrected P-value	False discovery rate	Gene(s) annotated to the term	Directly Annotated GOID List
34599	cellular response to oxidative stress	12 out of 45 genes, 26.7%	144 out of 6473 background genes, 2.2%	3.51e-08	0	C2_05060C_A:C2_07070W_A:PST2:CCP1:GLX3:TSA1:TSA1B:GST2:TRR1:CIP1:MDR1:PST3	42744:6457:90344:33554:71248:51701:98869:33194:19430:30447:19243:36091:34614:15903:42262:45454:30466:31669:71466:61077:34599:55114:6111:1302:61692:43433:77:42493:71276:1990961:42542:31505:1900436:36171:34613:70301:36170:45892:35690:9405
6979	response to oxidative stress	12 out of 45 genes, 26.7%	153 out of 6473 background genes, 2.4%	7.16e-08	0	C2_05060C_A:C2_07070W_A:PST2:CCP1:GLX3:TSA1:TSA1B:GST2:TRR1:CIP1:MDR1:PST3	42744:6457:90344:33554:71248:51701:98869:33194:19430:30447:19243:36091:34614:15903:42262:45454:30466:31669:71466:61077:34599:6111:55114:1302:43433:61692:77:42493:1990961:71276:42542:1900436:31505:36171:34613:36170:70301:45892:35690:9405
55114	oxidation-reduction process	13 out of 45 genes, 28.9%	405 out of 6473 background genes, 6.3%	0.00053	0	GOR1:C2_07070W_A:GPD1:CCP1:TSA1:TSA1B:SCS7:GDH3:OYE32:TRR1:EBP1:OYE23:C7_01150W_A	42744:6457:90344:5975:33554:51701:98869:36164:19676:33194:19430:30447:36091:36267:34614:9436:42262:45454:6116:61077:34599:6973:6111:55114:6520:46168:6537:1302:16558:43433:61692:77:8202:6675:42542:6114:31505:36171:6072:6673:36170:70301:6725:6633
6081	cellular aldehyde metabolic process	4 out of 45 genes, 8.9%	16 out of 6473 background genes, 0.2%	0.00086	0	GOR1:GLX3:GRP2:CR_09100C_A	19243:42821:9436:31669:34599:55114:9438:6090
98869	cellular oxidant detoxification	3 out of 45 genes, 6.7%	9 out of 6473 background genes, 0.1%	0.00632	0.02	TSA1:TSA1B:TRR1	42744:6457:90344:33554:51701:98869:33194:19430:30447:36091:42262:45454:61077:34599:6111:55114:1302:43433:61692:77:42542:31505:36171:36170:70301
45454	cell redox homeostasis	4 out of 45 genes, 8.9%	31 out of 6473 background genes, 0.5%	0.01381	0.0233	TSA1:TSA1B:OYE32:TRR1	42744:6457:90344:33554:51701:98869:33194:19430:30447:36091:42262:45454:61077:34599:6111:55114:1302:43433:61692:77:42542:31505:36171:36170:70301
34614	cellular response to reactive oxygen species	4 out of 45 genes, 8.9%	33 out of 6473 background genes, 0.5%	0.01778	0.02	CCP1:TSA1:TSA1B:TRR1	42744:6457:90344:33554:51701:98869:33194:19430:30447:36091:34614:42262:45454:61077:34599:6111:55114:1302:43433:61692:77:42542:31505:36171:36170:70301
302	response to reactive oxygen species	4 out of 45 genes, 8.9%	37 out of 6473 background genes, 0.6%	0.02812	0.02	CCP1:TSA1:TSA1B:TRR1	42744:6457:90344:33554:51701:98869:33194:19430:30447:36091:34614:42262:45454:61077:34599:6111:55114:1302:43433:61692:77:42542:31505:36171:36170:70301
19740	nitrogen utilization	3 out of 45 genes, 6.7%	16 out of 6473 background genes, 0.2%	0.04077	0.0311	MEP1:GDH3:GAP1	44182:97638:19740:19676:30447:97639:36267:15696:55114:6520:72488:6537:3333:6995:6865
33554	cellular response to stress	15 out of 45 genes, 33.3%	795 out of 6473 background genes, 12.3%	0.04605	0.028	YIM1:C2_05060C_A:C2_07070W_A:PST2:GPD1:MEP1:CCP1:GLX3:TSA1:TSA1B:GST2:TRR1:CIP1:MDR1:PST3	42744:6974:6457:90344:5975:33554:71248:51701:98869:19740:36164:33194:19430:30447:19243:36091:34614:15696:15903:42262:45454:30466:6116:31669:71466:61077:34599:6973:6111:55114:72488:46168:1302:16558:43433:61692:77:42493:6995:1990961:71276:42542:6114:1900436:31505:36171:6072:34613:36170:70301:45892:35690:9405
70887	cellular response to chemical stimulus	13 out of 45 genes, 28.9%	619 out of 6473 background genes, 9.6%	0.04961	0.0255	C2_05060C_A:C2_07070W_A:C2_07280W_A:PST2:CCP1:GLX3:TSA1:TSA1B:GST2:TRR1:CIP1:MDR1:PST3	42744:6457:90344:33554:71248:51701:98869:33194:19430:30447:19243:36091:34614:15903:42262:45454:30466:31669:71466:61077:34599:6111:55114:1302:43433:61692:77:42493:1990961:71276:42542:1900436:31505:36171:34613:36170:70301:45892:9405:35690
Molecular function
GOID	GO_term	Cluster frequency	Background frequency	Corrected P-value	False discovery rate	Gene(s) annotated to the term	Directly Annotated GOID List
16491	oxidoreductase activity	21 out of 45 genes, 46.7%	429 out of 6473 background genes, 6.6%	5.27e-12	0	GOR1:CSH1:IFD6:YIM1:C2_05060C_A:C2_07070W_A:PST2:GPD1:CCP1:TSA1:TSA1B:SCS7:GDH3:OYE32:TRR1:GRP2:EBP1:OYE23:C7_01150W_A:PST3:CR_09100C_A	43022:4601:4175:3955:18456:5506:51287:8270:8198:16616:47964:50625:4367:3959:16491:50236:4130:16747:8379:3677:4791:42803:16701:51920:3824:8144:32542:35925:4354:4033:3960:10181:5515:80132:51082:5496:50662:32440:19207:30985:42562:20037
48037	cofactor binding	11 out of 45 genes, 24.4%	233 out of 6473 background genes, 3.6%	2e-05	0	GOR1:C2_00390C_A:PST2:GPD1:CCP1:SCS7:OYE32:GRP2:EBP1:OYE23:PST3	4601:3955:5506:51287:47964:16616:50625:4367:3959:16491:4121:4130:47804:42803:3824:8144:10181:80132:5496:50662:42562:20037:30170
10181	FMN binding	5 out of 45 genes, 11.1%	24 out of 6473 background genes, 0.4%	2.78e-05	0	PST2:OYE32:EBP1:OYE23:PST3	3955:50625:3959:16491:3824:8144:10181:5496:42562
50662	coenzyme binding	9 out of 45 genes, 20.0%	152 out of 6473 background genes, 2.3%	4.12e-05	0	GOR1:C2_00390C_A:PST2:GPD1:OYE32:GRP2:EBP1:OYE23:PST3	3955:51287:47964:16616:50625:4367:3959:16491:4121:47804:42803:3824:8144:10181:5496:50662:42562:30170
16209	antioxidant activity	5 out of 45 genes, 11.1%	32 out of 6473 background genes, 0.5%	0.00012	0	C2_05060C_A:CCP1:TSA1:TSA1B:TRR1	43022:4601:8198:4130:8379:3677:4791:51920:32542:5515:51082:19207:30985:20037
16616	oxidoreductase activity, acting on the CH-OH group of donors, NAD or NADP as acceptor	6 out of 45 genes, 13.3%	69 out of 6473 background genes, 1.1%	0.00038	0	GOR1:CSH1:IFD6:GPD1:GRP2:CR_09100C_A	18456:51287:47964:16616:4367:16491:50236:42803:4033:50662
16614	oxidoreductase activity, acting on CH-OH group of donors	6 out of 45 genes, 13.3%	73 out of 6473 background genes, 1.1%	0.00053	0	GOR1:CSH1:IFD6:GPD1:GRP2:CR_09100C_A	18456:51287:47964:16616:4367:16491:50236:42803:4033:50662
16651	oxidoreductase activity, acting on NAD(P)H	5 out of 45 genes, 11.1%	48 out of 6473 background genes, 0.7%	0.00099	0	C2_07070W_A:PST2:TRR1:EBP1:PST3	3955:8270:8198:50625:3959:16491:16747:4791:8144:35925:3960:10181:5496:32440:42562
18456	aryl-alcohol dehydrogenase (NAD+) activity	2 out of 45 genes, 4.4%	3 out of 6473 background genes, 0.0%	0.0079	0.0044	CSH1:IFD6	18456:16491
4601	peroxidase activity	3 out of 45 genes, 6.7%	17 out of 6473 background genes, 0.3%	0.01117	0.008	CCP1:TSA1:TSA1B	43022:4601:4130:8379:51920:5515:51082:19207:30985:20037
16684	oxidoreductase activity, acting on peroxide as acceptor	3 out of 45 genes, 6.7%	18 out of 6473 background genes, 0.3%	0.01333	0.0109	CCP1:TSA1:TSA1B	43022:4601:4130:8379:51920:5515:51082:19207:30985:20037
3955	NAD(P)H dehydrogenase (quinone) activity	2 out of 45 genes, 4.4%	4 out of 6473 background genes, 0.1%	0.01574	0.02	PST2:PST3	3955:50625:16491:10181
16655	oxidoreductase activity, acting on NAD(P)H, quinone or similar compound as acceptor	3 out of 45 genes, 6.7%	21 out of 6473 background genes, 0.3%	0.02142	0.0185	C2_07070W_A:PST2:PST3	3955:8270:50625:16491:16747:35925:3960:10181:32440
Cellular component
GOID	GO_term	Cluster frequency	Background frequency	Corrected P-value	False discovery rate	Gene(s) annotated to the term	Directly Annotated GOID List
30446	hyphal cell wall	6 out of 45 genes, 13.3%	69 out of 6473 background genes, 1.1%	0.00035	0	CSH1:PST2:GLX3:TSA1:TSA1B:EBP1	5622:5737:5844:9986:5829:9277:5634:324:932:30445:10494:30446:62040:5886
5618	cell wall	8 out of 45 genes, 17.8%	163 out of 6473 background genes, 2.5%	0.00069	0	CSH1:C1_13290W_A:PST2:GLX3:TSA1:TSA1B:GAP1:EBP1	5622:5737:5628:9986:5829:32178:5619:324:932:16021:5886:5844:9277:5634:32153:30445:10494:31520:30446:62040
9277	fungal-type cell wall	8 out of 45 genes, 17.8%	163 out of 6473 background genes, 2.5%	0.00069	0	CSH1:C1_13290W_A:PST2:GLX3:TSA1:TSA1B:GAP1:EBP1	5622:5737:5628:9986:5829:32178:5619:324:932:16021:5886:5844:9277:32153:5634:30445:10494:31520:30446:62040
30312	external encapsulating structure	8 out of 45 genes, 17.8%	164 out of 6473 background genes, 2.5%	0.00072	0	CSH1:C1_13290W_A:PST2:GLX3:TSA1:TSA1B:GAP1:EBP1	5622:5737:5628:9986:5829:32178:5619:324:932:16021:5886:5844:9277:32153:5634:30445:10494:31520:30446:62040
31012	extracellular matrix	5 out of 45 genes, 11.1%	74 out of 6473 background genes, 1.1%	0.00757	0.024	GLX3:TRR1:GRP2:CIP1:PST3	5622:5737:5829:5758:932:5886:31934:16020:30445:10494:5576:45121:30446:62040
44421	extracellular region part	5 out of 45 genes, 11.1%	74 out of 6473 background genes, 1.1%	0.00757	0.02	GLX3:TRR1:GRP2:CIP1:PST3	5622:5737:5829:5758:932:5886:31934:16020:30445:10494:5576:45121:30446:62040
62039	biofilm matrix	5 out of 45 genes, 11.1%	74 out of 6473 background genes, 1.1%	0.00757	0.0171	GLX3:TRR1:GRP2:CIP1:PST3	5622:5737:5829:5758:932:5886:31934:16020:30445:10494:5576:45121:30446:62040
62040	fungal biofilm matrix	5 out of 45 genes, 11.1%	74 out of 6473 background genes, 1.1%	0.00757	0.015	GLX3:TRR1:GRP2:CIP1:PST3	5622:5737:5829:5758:932:5886:31934:16020:30445:10494:5576:45121:30446:62040
5576	extracellular region	7 out of 45 genes, 15.6%	191 out of 6473 background genes, 3.0%	0.0159	0.0156	GOR1:GLX3:GDH3:TRR1:GRP2:CIP1:PST3	5622:5737:5829:5758:932:5886:31934:16020:5634:30445:10494:5576:45121:30446:62040
Downregulated gene set
Biological process
GOID	GO_term	Cluster frequency	Background frequency	Corrected P-value	False discovery rate	Gene(s) annotated to the term	Directly Annotated GOID List
55114	oxidation-reduction process	8 out of 19 genes, 42.1%	405 out of 6473 background genes, 6.3%	0.00062	0.04	C2_10070W_A:C3_03470W_A:FRE10:CFL2:FET99:FET31:MAE1:SOD3	6801:9450:55114:6520:46456:6108:1324:6826:6879:35690:19430:6540:6090:34599
9450	gamma-aminobutyric acid catabolic process	2 out of 19 genes, 10.5%	4 out of 6473 background genes, 0.1%	0.00336	0.05	UGA1:C3_03470W_A	55114:9450:6536:9448:43605:6540:34599
43648	dicarboxylic acid metabolic process	3 out of 19 genes, 15.8%	29 out of 6473 background genes, 0.4%	0.00515	0.0333	UGA1:C3_03470W_A:MAE1	55114:9450:6520:6536:9448:6108:43605:6540:6090:34599
9448	gamma-aminobutyric acid metabolic process	2 out of 19 genes, 10.5%	5 out of 6473 background genes, 0.1%	0.0056	0.03	UGA1:C3_03470W_A	55114:9450:6536:9448:43605:6540:34599
6536	glutamate metabolic process	2 out of 19 genes, 10.5%	11 out of 6473 background genes, 0.2%	0.03049	0.044	UGA1:C3_03470W_A	55114:9450:6536:9448:43605:6540:34599
42135	neurotransmitter catabolic process	2 out of 19 genes, 10.5%	12 out of 6473 background genes, 0.2%	0.03653	0.0567	UGA1:C3_03470W_A	55114:9450:6536:9448:43605:6540:34599
Molecular function
GOID	GO_term	Cluster frequency	Background frequency	Corrected P-value	False discovery rate	Gene(s) annotated to the term	Directly Annotated GOID List
16491	oxidoreductase activity	8 out of 19 genes, 42.1%	429 out of 6473 background genes, 6.6%	0.00035	0.04	C2_10070W_A:C3_03470W_A:FRE10:CFL2:FET99:FET31:MAE1:SOD3	4470:9013:16620:51287:46872:4471:5507:30145:16616:16722:8823:293:4784:16491
Cellular component
GOID	GO_term	Cluster frequency	Background frequency	Corrected P-value	False discovery rate	Gene(s) annotated to the term	Directly Annotated GOID List
No significant ontology term can be found for input genes.

## Sheet: Part 5
Supplementary Table 2 Results of the gene set enrichment analysis
Part 5 – QMY23 strain BM+MSB treated vs. QMY23 strain untreated
Upregulated gene set
Biological process
GOID	GO_term	Cluster frequency	Background frequency	Corrected P-value	False discovery rate	Gene(s) annotated to the term	Directly Annotated GOID List
55114	oxidation-reduction process	47 out of 253 genes, 18.6%	405 out of 6473 background genes, 6.3%	4.51e-09	0	HOM6:LYS2:GOR1:C1_05990C_A:CAT1:GPX3:ZWF1:ERO1:C1_11530C_A:MRF1:C1_14190C_A:C2_01660C_A:RNR21:CDC19:C2_07070W_A:C2_07270W_A:C2_08100W_A:GPD1:CCP1:C3_02850C_A:TSA1:TSA1B:LYS9:MET8:C3_07330W_A:C4_02230C_A:SCS7:GDH3:OYE32:GLR1:TRR1:ADH1:GPX2:C6_00850W_A:ILV5:EBP1:OYE2:OYE23:QCR7:C7_01150W_A:C7_03780C_A:OYE22:LYS12:PDX3:DIT2:IFE2:TRX1	6096:1900409:9060:1410:6006:32516:90344:5975:6890:51701:1990355:61621:42144:61407:36245:30447:1561:36267:44416:45454:9186:19878:103:6116:6888:61077:46521:1315:44273:11:6111:71216:55114:8615:6520:30476:6537:16558:19379:77:9088:6979:34209:6553:1900180:6066:9085:6873:10731:304:6740:6114:80058:31505:6072:6673:302:6725:6915:9082:19615:6090:9051:6749:35308:6122:18171:42744:6457:7094:44182:1901089:6662:…
44283	small molecule biosynthetic process	38 out of 253 genes, 15.0%	280 out of 6473 background genes, 4.3%	5.76e-09	0	HOM6:LYS2:C1_02970W_A:ARG2:C1_05990C_A:ACP1:C2_00390C_A:BAT21:CDC19:ILV1:GPD1:CAP1:ILV2:LYS9:HIS5:ILV6:FBA1:PYC2:LYS4:SCS7:LYS1:HOM3:ARO9:GDH3:THR1:THR4:HAM1:ILV5:HIS7:LEU1:LYS12:RIB1:CR_03740C_A:PDX3:PGI1:CR_09100C_A:INO1:TRX1	6021:6096:9092:1900409:43935:30448:43619:5975:6890:51701:1990355:45944:61621:42144:9073:9231:61408:30447:36267:9072:44416:48315:6567:45454:19878:6116:6888:9143:9097:19346:11:71216:55114:8615:6520:6537:16558:10038:6094:45461:19379:7163:1900766:9088:9074:6979:6553:1900101:36252:8152:1900760:9085:304:15810:6114:80058:6072:6673:15976:1900835:6771:949:52699:6915:9082:51211:6090:42744:61404:9398:10045:…
8652	cellular amino acid biosynthetic process	23 out of 253 genes, 9.1%	107 out of 6473 background genes, 1.7%	9.09e-09	0	HOM6:LYS2:C1_02970W_A:ARG2:C2_00390C_A:BAT21:ILV1:ILV2:LYS9:HIS5:ILV6:LYS4:LYS1:HOM3:ARO9:GDH3:THR1:THR4:ILV5:HIS7:LEU1:LYS12:TRX1	9092:1900409:6890:1990355:42144:9073:30447:36267:9072:6567:45454:19878:6888:9097:19346:11:55114:6520:6537:19379:9088:9074:6553:8152:9085:80058:949:52699:9082:42744:10045:44182:6662:2:9058:19676:1900429:9094:34614:71266:6592:1903257:34599:9099:9086:8652:9083:9081:19477:105:9098:6566:6571:9090
6979	response to oxidative stress	26 out of 253 genes, 10.3%	153 out of 6473 background genes, 2.4%	1.07e-07	0	TTR1:CAT1:GPX3:ZWF1:YBP1:HSP21:C2_05060C_A:GRE2:C2_07070W_A:C2_08100W_A:PST2:CAP1:CCP1:GLX3:TSA1:TSA1B:GST2:GLR1:TRR1:GPX2:C6_00850W_A:CIP1:MDR1:YCP4:PST3:TRX1	1900409:43935:6006:43619:90344:6890:71248:51701:1990355:44237:45944:42144:61407:36245:19243:61408:30447:15903:45454:6888:61077:1315:11:6111:55114:70370:10038:45461:19379:77:1900766:6979:1900101:36252:1900760:10731:304:6740:80058:1900436:31505:6970:1900835:45892:302:6915:9051:6749:70414:18171:61404:42744:6457:1900793:44182:6662:33554:98869:20012:33194:19430:1900429:36091:34614:6355:42262:42743:304…
1901607	alpha-amino acid biosynthetic process	20 out of 253 genes, 7.9%	95 out of 6473 background genes, 1.5%	3.15e-07	0	HOM6:LYS2:ARG2:C2_00390C_A:BAT21:ILV1:ILV2:LYS9:HIS5:LYS4:LYS1:HOM3:ARO9:GDH3:THR1:THR4:HIS7:LEU1:LYS12:TRX1	9092:1900409:6890:1990355:42144:9073:30447:36267:9072:6567:45454:19878:6888:9097:19346:11:55114:6520:6537:19379:9088:9074:6553:8152:9085:80058:949:9082:42744:10045:44182:6662:9058:19676:1900429:9094:34614:71266:6592:34599:9099:9086:8652:9083:9081:19477:105:9098:6566:6571:9090
16053	organic acid biosynthetic process	27 out of 253 genes, 10.7%	174 out of 6473 background genes, 2.7%	3.93e-07	0	HOM6:LYS2:C1_02970W_A:ARG2:C1_05990C_A:ACP1:C2_00390C_A:BAT21:CDC19:ILV1:ILV2:LYS9:HIS5:ILV6:LYS4:SCS7:LYS1:HOM3:ARO9:GDH3:THR1:THR4:ILV5:HIS7:LEU1:LYS12:TRX1	6096:9092:1900409:6890:1990355:61621:42144:9073:30447:36267:9072:44416:6567:45454:19878:6888:9097:19346:11:71216:55114:6520:6537:19379:9088:9074:6553:8152:9085:80058:6673:949:52699:9082:6090:42744:10045:44182:6662:2:36180:9058:19676:1900429:9094:34614:71266:6592:1903257:42866:34599:9267:9099:9086:8652:9083:9081:19477:105:9098:6675:36170:6566:6571:6633:9090:15940
46394	carboxylic acid biosynthetic process	27 out of 253 genes, 10.7%	174 out of 6473 background genes, 2.7%	3.93e-07	0	HOM6:LYS2:C1_02970W_A:ARG2:C1_05990C_A:ACP1:C2_00390C_A:BAT21:CDC19:ILV1:ILV2:LYS9:HIS5:ILV6:LYS4:SCS7:LYS1:HOM3:ARO9:GDH3:THR1:THR4:ILV5:HIS7:LEU1:LYS12:TRX1	6096:9092:1900409:6890:1990355:61621:42144:9073:30447:36267:9072:44416:6567:45454:19878:6888:9097:19346:11:71216:55114:6520:6537:19379:9088:9074:6553:8152:9085:80058:6673:949:52699:9082:6090:42744:10045:44182:6662:2:36180:9058:19676:1900429:9094:34614:71266:6592:1903257:42866:34599:9267:9099:9086:8652:9083:9081:19477:105:9098:6675:36170:6566:6571:6633:9090:15940
302	response to reactive oxygen species	13 out of 253 genes, 5.1%	37 out of 6473 background genes, 0.6%	4.38e-07	0	TTR1:CAT1:GPX3:ZWF1:YBP1:C2_08100W_A:CAP1:CCP1:TSA1:TSA1B:TRR1:C6_00850W_A:TRX1	1900409:43935:6006:43619:90344:6890:51701:1990355:45944:42144:61407:61408:30447:45454:6888:61077:1315:11:6111:55114:10038:45461:19379:77:1900766:6979:1900101:36252:1900760:304:6740:80058:31505:1900835:302:6915:9051:6749:18171:61404:42744:6457:44182:1900793:6662:33554:98869:20012:33194:19430:1900429:36091:34614:6355:42262:42743:43065:34599:9267:1302:43433:61692:42493:9408:1900380:36184:71276:30436…
44281	small molecule metabolic process	54 out of 253 genes, 21.3%	602 out of 6473 background genes, 9.3%	2.08e-06	0	HOM6:LYS2:C1_02970W_A:GOR1:GPM2:DUR1,2:ARG2:C1_05990C_A:ACP1:CAT8:ZWF1:C2_00390C_A:C2_01660C_A:RNR21:BAT21:CDC19:ILV1:C2_06430C_A:ARE2:GPD1:CAP1:ILV2:GLX3:C3_02850C_A:ATF1:BAT22:LYS9:HIS5:ILV6:FBA1:PYC2:LYS4:SCS7:LYS1:HOM3:ARO9:GDH3:THR1:THR4:GRP2:HAM1:ILV5:C6_02030C_A:HIS7:LEU1:LYS12:RIB1:CR_03740C_A:PDX3:PGI1:CR_09010C_A:CR_09100C_A:INO1:TRX1	6021:6096:1900409:6006:6890:51701:19740:1900443:45944:9231:61408:30447:1561:9072:48315:6567:45454:9186:6116:9097:43419:46521:6067:19346:11:8615:6520:45461:19379:9074:6553:1900101:8152:1900760:6807:9085:6740:15810:6114:6673:15976:6771:52699:9082:6090:42744:9398:35948:44182:6662:2:6240:70785:19676:6355:71266:6351:9217:61414:1903257:42866:8204:34599:46704:9267:35959:46168:8654:19477:9636:9263:190038…
19752	carboxylic acid metabolic process	38 out of 253 genes, 15.0%	350 out of 6473 background genes, 5.4%	4.35e-06	0	HOM6:LYS2:C1_02970W_A:GOR1:GPM2:ARG2:C1_05990C_A:ACP1:CAT8:C2_00390C_A:C2_01660C_A:BAT21:CDC19:ILV1:ILV2:GLX3:BAT22:LYS9:HIS5:ILV6:FBA1:PYC2:LYS4:SCS7:LYS1:HOM3:ARO9:GDH3:THR1:THR4:GRP2:ILV5:HIS7:LEU1:LYS12:PGI1:CR_09010C_A:TRX1	6096:1900409:6890:51701:1900443:45944:30447:1561:9072:48315:6567:45454:9097:46521:19346:11:6520:19379:9074:6553:8152:9085:15810:6673:15976:52699:9082:6090:42744:35948:44182:6662:2:70785:19676:71266:6351:61414:1903257:42866:34599:9267:35959:19477:70783:6675:36170:6566:9092:30448:5975:1990355:61621:42144:9073:19243:36267:44416:19878:6888:71216:55114:6537:6094:45733:7163:9088:80058:949:51211:10045:3…
34599	cellular response to oxidative stress	23 out of 253 genes, 9.1%	144 out of 6473 background genes, 2.2%	4.6e-06	0	TTR1:CAT1:GPX3:YBP1:HSP21:C2_05060C_A:GRE2:C2_07070W_A:PST2:CAP1:CCP1:GLX3:TSA1:TSA1B:GST2:GLR1:TRR1:C6_00850W_A:CIP1:MDR1:YCP4:PST3:TRX1	1900409:6890:51701:44237:45944:61408:30447:45454:11:45461:19379:1900101:1900760:10731:1900436:45892:6749:18171:42744:44182:6662:33554:6355:30466:71466:34599:9267:1900380:1990961:42542:36171:34613:36170:70301:9405:43935:43619:90344:71248:1990355:42144:61407:36245:19243:15903:6888:61077:1315:6111:55114:70370:10038:77:1900766:6979:36252:304:80058:31505:6970:1900835:302:6915:70414:61404:6457:1900793:…
9066	aspartate family amino acid metabolic process	13 out of 253 genes, 5.1%	46 out of 6473 background genes, 0.7%	9.13e-06	0	HOM6:LYS2:C2_00390C_A:ILV1:LYS9:LYS4:LYS1:HOM3:ARO9:THR1:THR4:LYS12:TRX1	1900409:6890:30447:9072:6567:45454:9097:19346:11:19379:9074:6553:8152:9085:42744:44182:6662:71266:34599:19477:6566:9092:1990355:42144:9073:19878:6888:55114:9088:80058:949:1900429:9094:34614:9099:9086:8652:6571:9090
43436	oxoacid metabolic process	38 out of 253 genes, 15.0%	362 out of 6473 background genes, 5.6%	1.11e-05	0	HOM6:LYS2:C1_02970W_A:GOR1:GPM2:ARG2:C1_05990C_A:ACP1:CAT8:C2_00390C_A:C2_01660C_A:BAT21:CDC19:ILV1:ILV2:GLX3:BAT22:LYS9:HIS5:ILV6:FBA1:PYC2:LYS4:SCS7:LYS1:HOM3:ARO9:GDH3:THR1:THR4:GRP2:ILV5:HIS7:LEU1:LYS12:PGI1:CR_09010C_A:TRX1	6096:1900409:6890:51701:1900443:45944:30447:1561:9072:48315:6567:45454:9097:46521:19346:11:6520:19379:9074:6553:8152:9085:15810:6673:15976:52699:9082:6090:42744:35948:44182:6662:2:70785:19676:71266:6351:61414:1903257:42866:34599:9267:35959:19477:70783:6675:36170:6566:9092:30448:5975:1990355:61621:42144:9073:19243:36267:44416:19878:6888:71216:55114:6537:6094:45733:7163:9088:80058:949:51211:10045:3…
9067	aspartate family amino acid biosynthetic process	12 out of 253 genes, 4.7%	39 out of 6473 background genes, 0.6%	1.16e-05	0	HOM6:LYS2:C2_00390C_A:LYS9:LYS4:LYS1:HOM3:ARO9:THR1:THR4:LYS12:TRX1	1900409:6890:30447:9072:45454:19346:11:19379:9074:6553:8152:9085:42744:44182:6662:71266:34599:19477:6566:9092:1990355:42144:9073:19878:6888:55114:9088:80058:949:1900429:9094:34614:9086:8652:6571:9090
6082	organic acid metabolic process	38 out of 253 genes, 15.0%	363 out of 6473 background genes, 5.6%	1.2e-05	0	HOM6:LYS2:C1_02970W_A:GOR1:GPM2:ARG2:C1_05990C_A:ACP1:CAT8:C2_00390C_A:C2_01660C_A:BAT21:CDC19:ILV1:ILV2:GLX3:BAT22:LYS9:HIS5:ILV6:FBA1:PYC2:LYS4:SCS7:LYS1:HOM3:ARO9:GDH3:THR1:THR4:GRP2:ILV5:HIS7:LEU1:LYS12:PGI1:CR_09010C_A:TRX1	6096:1900409:6890:51701:1900443:45944:30447:1561:9072:48315:6567:45454:9097:46521:19346:11:6520:19379:9074:6553:8152:9085:15810:6673:15976:52699:9082:6090:42744:35948:44182:6662:2:70785:19676:71266:6351:61414:1903257:42866:34599:9267:35959:19477:70783:6675:36170:6566:9092:30448:5975:1990355:61621:42144:9073:19243:36267:44416:19878:6888:71216:55114:6537:6094:45733:7163:9088:80058:949:51211:10045:3…
1901605	alpha-amino acid metabolic process	21 out of 253 genes, 8.3%	132 out of 6473 background genes, 2.0%	2.34e-05	0	HOM6:LYS2:ARG2:C2_00390C_A:BAT21:ILV1:ILV2:LYS9:HIS5:LYS4:LYS1:HOM3:ARO9:GDH3:THR1:THR4:HIS7:LEU1:LYS12:CR_09010C_A:TRX1	1900409:6890:30447:9072:6567:45454:9097:19346:11:6520:19379:9074:6553:8152:9085:9082:42744:44182:6662:19676:71266:34599:19477:6566:9092:1990355:42144:9073:36267:19878:6888:55114:6537:9088:80058:949:10045:9058:1900429:9094:34614:6592:9099:9086:8652:9083:9081:105:9098:6571:9090
42744	hydrogen peroxide catabolic process	5 out of 253 genes, 2.0%	5 out of 6473 background genes, 0.1%	6.82e-05	0	CAT1:TSA1:TSA1B:C6_00850W_A:TRX1	1900409:6890:51701:30447:45454:11:19379:42744:44182:6662:33554:34599:9267:42542:36171:36170:70301:9405:90344:1990355:42144:6888:61077:1315:6111:55114:77:6979:80058:31505:302:6457:33194:1900429:36091:34614:42262:42743:1302:43433:61692
6520	cellular amino acid metabolic process	25 out of 253 genes, 9.9%	196 out of 6473 background genes, 3.0%	0.0001	0	HOM6:LYS2:C1_02970W_A:ARG2:C2_00390C_A:BAT21:ILV1:ILV2:BAT22:LYS9:HIS5:ILV6:LYS4:LYS1:HOM3:ARO9:GDH3:THR1:THR4:ILV5:HIS7:LEU1:LYS12:CR_09010C_A:TRX1	1900409:6890:30447:9072:6567:45454:9097:19346:11:6520:19379:9074:6553:8152:9085:52699:9082:42744:44182:6662:2:19676:71266:1903257:34599:19477:6566:9092:1990355:42144:9073:36267:19878:6888:55114:6537:9088:80058:949:10045:9058:1900429:9094:34614:6592:9099:9086:8652:9083:9081:105:9098:6571:9090
98869	cellular oxidant detoxification	6 out of 253 genes, 2.4%	9 out of 6473 background genes, 0.1%	0.00019	0	TTR1:CAT1:TSA1:TSA1B:TRR1:C6_00850W_A	51701:30447:45454:6749:42744:33554:34599:9267:42542:36171:36170:70301:9405:90344:61077:1315:6111:55114:77:6979:31505:302:6457:98869:33194:19430:36091:42262:42743:1302:43433:61692
34614	cellular response to reactive oxygen species	10 out of 253 genes, 4.0%	33 out of 6473 background genes, 0.5%	0.00022	0	TTR1:CAT1:GPX3:YBP1:CCP1:TSA1:TSA1B:TRR1:C6_00850W_A:TRX1	1900409:6890:51701:30447:45454:11:19379:6749:18171:42744:44182:6662:33554:34599:9267:42542:36171:36170:70301:9405:90344:1990355:42144:61407:6888:61077:1315:6111:55114:77:6979:80058:31505:302:6457:98869:33194:19430:1900429:36091:34614:42262:42743:1302:43433:61692
42743	hydrogen peroxide metabolic process	5 out of 253 genes, 2.0%	6 out of 6473 background genes, 0.1%	0.00039	0	CAT1:TSA1:TSA1B:C6_00850W_A:TRX1	1900409:6890:51701:30447:45454:11:19379:42744:44182:6662:33554:34599:9267:42542:36171:36170:70301:9405:90344:1990355:42144:6888:61077:1315:6111:55114:77:6979:80058:31505:302:6457:33194:1900429:36091:34614:42262:42743:1302:43433:61692
6553	lysine metabolic process	6 out of 253 genes, 2.4%	11 out of 6473 background genes, 0.2%	0.00102	0	LYS2:LYS9:LYS4:LYS1:ARO9:LYS12	9072:9074:6553:9085:19477:9073:19878:55114:949:9094:6571
9085	lysine biosynthetic process	6 out of 253 genes, 2.4%	11 out of 6473 background genes, 0.2%	0.00102	0	LYS2:LYS9:LYS4:LYS1:ARO9:LYS12	9072:9074:6553:9085:19477:9073:19878:55114:949:9094:6571
9081	branched-chain amino acid metabolic process	7 out of 253 genes, 2.8%	17 out of 6473 background genes, 0.3%	0.00138	0	BAT21:ILV1:ILV2:BAT22:ILV6:ILV5:LEU1	6567:9097:8152:9082:2:55114:9099:8652:9083:9081:9098
61691	detoxification of hydrogen peroxide	4 out of 253 genes, 1.6%	4 out of 6473 background genes, 0.1%	0.00177	0	CAT1:TSA1:TSA1B:C6_00850W_A	51701:30447:45454:42744:33554:34599:9267:42542:36171:36170:70301:9405:90344:61077:1315:6111:55114:77:6979:31505:302:6457:33194:36091:42262:42743:1302:43433:61692
61692	cellular detoxification of hydrogen peroxide	4 out of 253 genes, 1.6%	4 out of 6473 background genes, 0.1%	0.00177	0	CAT1:TSA1:TSA1B:C6_00850W_A	51701:30447:45454:42744:33554:34599:9267:42542:36171:36170:70301:9405:90344:61077:1315:6111:55114:77:6979:31505:302:6457:33194:36091:42262:42743:1302:43433:61692
9082	branched-chain amino acid biosynthetic process	6 out of 253 genes, 2.4%	12 out of 6473 background genes, 0.2%	0.00197	0	BAT21:ILV1:ILV2:ILV6:ILV5:LEU1	6567:9097:8152:9082:2:55114:9099:8652:9083:9081:9098
1901700	response to oxygen-containing compound	15 out of 253 genes, 5.9%	95 out of 6473 background genes, 1.5%	0.0026	0	TTR1:CAT1:GPX3:ZWF1:YBP1:C2_08100W_A:GCN4:CAP1:CCP1:TSA1:TSA1B:GLR1:TRR1:C6_00850W_A:TRX1	60261:1900409:6006:36178:6890:36278:51701:45944:97316:61408:30447:45454:11:45461:19379:45899:1900101:1900760:10731:6740:36244:6749:18171:42744:44182:6662:33554:1903833:1080:34198:6355:34599:9267:44011:1900380:42542:1900233:36171:36170:70301:9405:43935:43619:90344:1990355:45893:42144:61407:36245:10691:6888:61077:1315:6111:71216:55114:10038:1900442:77:1900766:6979:36252:304:80058:31505:1900835:302:…
42542	response to hydrogen peroxide	7 out of 253 genes, 2.8%	19 out of 6473 background genes, 0.3%	0.00335	0	CAT1:GPX3:ZWF1:YBP1:TSA1:TSA1B:C6_00850W_A	6006:51701:30447:45454:6740:18171:42744:33554:34599:9267:42542:36171:36170:70301:9405:90344:61407:61077:1315:6111:55114:77:6979:31505:302:9051:6457:33194:36091:42262:42743:1302:43433:61692
1901701	cellular response to oxygen-containing compound	13 out of 253 genes, 5.1%	78 out of 6473 background genes, 1.2%	0.00645	0	TTR1:CAT1:GPX3:YBP1:GCN4:CAP1:CCP1:TSA1:TSA1B:GLR1:TRR1:C6_00850W_A:TRX1	60261:1900409:36178:6890:36278:51701:45944:97316:61408:30447:45454:11:45461:19379:45899:1900101:1900760:10731:36244:6749:18171:42744:44182:6662:33554:1903833:1080:34198:6355:34599:9267:44011:1900380:42542:1900233:36171:36170:70301:9405:43935:43619:90344:1990355:45893:42144:61407:36245:10691:6888:61077:1315:6111:71216:55114:10038:1900442:77:1900766:6979:36252:304:80058:31505:1900835:302:6915:61404…
72593	reactive oxygen species metabolic process	7 out of 253 genes, 2.8%	21 out of 6473 background genes, 0.3%	0.00724	0	TTR1:CAT1:TSA1:TSA1B:TRR1:C6_00850W_A:TRX1	1900409:6890:51701:30447:45454:11:19379:6749:42744:44182:6662:33554:34599:9267:42542:36171:36170:70301:9405:90344:1990355:42144:6888:61077:1315:6111:55114:77:6979:80058:31505:302:6457:98869:33194:19430:1900429:36091:34614:42262:42743:1302:43433:61692
19878	lysine biosynthetic process via aminoadipic acid	5 out of 253 genes, 2.0%	9 out of 6473 background genes, 0.1%	0.00754	0	LYS2:LYS9:LYS4:LYS1:ARO9	9072:9074:9085:19477:9073:19878:55114:949:9094:6571
36091	positive regulation of transcription from RNA polymerase II promoter in response to oxidative stress	5 out of 253 genes, 2.0%	9 out of 6473 background genes, 0.1%	0.00754	0	GPX3:YBP1:CAP1:TSA1:TSA1B	51701:45944:30447:61408:45454:45461:1900101:1900760:18171:42744:33554:6355:34599:1900380:42542:36171:36170:70301:43935:43619:90344:61407:61077:6111:55114:10038:77:1900766:6979:36252:304:31505:1900835:6915:61404:6457:1900793:20012:33194:36091:42262:1302:43433:61692:42493:9408:36184:71276:30436:6357:35690
6566	threonine metabolic process	5 out of 253 genes, 2.0%	9 out of 6473 background genes, 0.1%	0.00754	0	HOM6:ILV1:HOM3:THR1:THR4	6567:9097:8152:6566:9092:55114:9088:9099:9086:8652:9090
9088	threonine biosynthetic process	4 out of 253 genes, 1.6%	5 out of 6473 background genes, 0.1%	0.00858	0	HOM6:HOM3:THR1:THR4	8152:6566:9092:55114:9088:9086:8652:9090
45454	cell redox homeostasis	8 out of 253 genes, 3.2%	31 out of 6473 background genes, 0.5%	0.01367	0	TTR1:TSA1:TSA1B:OYE32:GLR1:TRR1:C6_00850W_A:TRX1	1900409:6890:51701:30447:45454:11:19379:10731:6749:42744:44182:6662:33554:34599:42542:36171:36170:70301:9405:90344:1990355:42144:36245:6888:61077:6111:55114:77:6979:80058:31505:6457:98869:33194:19430:1900429:36091:34614:42262:1302:43433:61692
17001	antibiotic catabolic process	6 out of 253 genes, 2.4%	17 out of 6473 background genes, 0.3%	0.02247	0	CAT1:CAT8:TSA1:TSA1B:C6_00850W_A:TRX1	1900409:6890:51701:1900443:45944:30447:45454:11:19379:15976:42744:35948:44182:6662:33554:70785:6351:61414:34599:9267:35959:70783:42542:36171:36170:70301:9405:90344:1990355:42144:6888:61077:1315:6111:55114:45733:77:6979:80058:31505:302:6457:36180:33194:1900429:36091:34614:42262:42743:1302:43433:61692
70301	cellular response to hydrogen peroxide	6 out of 253 genes, 2.4%	17 out of 6473 background genes, 0.3%	0.02247	0	CAT1:GPX3:YBP1:TSA1:TSA1B:C6_00850W_A	51701:30447:45454:18171:42744:33554:34599:9267:42542:36171:36170:70301:9405:90344:61407:61077:1315:6111:55114:77:6979:31505:302:6457:33194:36091:42262:42743:1302:43433:61692
10035	response to inorganic substance	14 out of 253 genes, 5.5%	103 out of 6473 background genes, 1.6%	0.03215	0	TTR1:CAT1:GPX3:ZWF1:YBP1:C2_08100W_A:CAP1:TSA1:TSA1B:HIS5:GST2:TRR1:C6_00850W_A:CIP1	6006:51701:45944:61408:30447:45454:45461:1900101:1900760:6740:1900436:6749:18171:42744:33554:6355:71466:34599:9267:1900380:42542:36171:36170:70301:9405:43935:43619:90344:71248:61407:61077:1315:6111:55114:10038:77:1900766:6979:36252:304:31505:1900835:302:6915:9051:61404:10045:6457:1900793:98869:9058:20012:33194:19430:36091:42262:42743:43065:1302:43433:61692:42493:105:9408:36184:71276:30436:6357:35…
9092	homoserine metabolic process	5 out of 253 genes, 2.0%	12 out of 6473 background genes, 0.2%	0.04306	0.0005	HOM6:C2_00390C_A:HOM3:THR1:CR_09010C_A	19346:8152:71266:6566:9092:55114:9088:9086:8652:9090
97237	cellular response to toxic substance	8 out of 253 genes, 3.2%	36 out of 6473 background genes, 0.6%	0.04424	0.0005	TTR1:CAT1:GPX3:YBP1:TSA1:TSA1B:TRR1:C6_00850W_A	51701:30447:45454:6749:18171:42744:33554:34599:9267:42542:36171:36170:70301:9405:90344:61407:61077:1315:6111:55114:77:6979:31505:302:6457:98869:33194:19430:36091:42262:42743:1302:43433:61692
9099	valine biosynthetic process	3 out of 253 genes, 1.2%	3 out of 6473 background genes, 0.0%	0.04586	0.001	BAT21:ILV1:ILV2	6567:9097:8152:9082:9099:9083:9081:9098
1990748	cellular detoxification	6 out of 253 genes, 2.4%	19 out of 6473 background genes, 0.3%	0.04611	0.0009	TTR1:CAT1:TSA1:TSA1B:TRR1:C6_00850W_A	51701:30447:45454:6749:42744:33554:34599:9267:42542:36171:36170:70301:9405:90344:61077:1315:6111:55114:77:6979:31505:302:6457:98869:33194:19430:36091:42262:42743:1302:43433:61692
Molecular function
GOID	GO_term	Cluster frequency	Background frequency	Corrected P-value	False discovery rate	Gene(s) annotated to the term	Directly Annotated GOID List
16491	oxidoreductase activity	60 out of 253 genes, 23.7%	429 out of 6473 background genes, 6.6%	7.24e-17	0	TTR1:HOM6:LYS2:GOR1:CSH1:IFD6:LPG20:C1_05180C_A:C1_05990C_A:CAT1:GPX3:ZWF1:ERO1:C1_11530C_A:MRF1:C2_01660C_A:RNR21:YIM1:C2_05060C_A:GRE2:C2_07070W_A:C2_07270W_A:C2_08100W_A:PST2:GPD1:CCP1:GTT12:TSA1:TSA1B:LYS9:MET8:C3_07330W_A:C4_02230C_A:SCS7:LYS1:GDH3:OYE32:GLR1:TRR1:GRP2:ADH1:GPX2:C6_00850W_A:ILV5:EBP1:OYE2:OYE23:QCR7:C7_01150W_A:C7_03780C_A:OYE22:LYS12:DRE2:PDX3:DIT2:IFE2:YCP4:PST3:CR_09100C_…	51536:43022:16638:19170:3955:18456:5506:51287:8270:4090:8198:8121:50625:4755:16491:16972:50236:15036:16747:3690:8379:4364:4791:51920:4043:32542:35925:4033:4096:102672:18576:3960:5515:8199:8677:47046:5496:8137:4362:20037:4733:4022:50660:4175:4601:51063:16616:47964:50661:907:43115:15038:4367:3959:3729:51539:3756:4748:4130:31177:9055:47066:16671:3677:42803:16701:4602:3824:8144:19825:4497:4754:16209:…
48037	cofactor binding	37 out of 253 genes, 14.6%	233 out of 6473 background genes, 3.6%	2.27e-11	0	HOM6:LYS2:C1_02970W_A:GOR1:C1_05990C_A:CAT1:ZWF1:ERO1:C2_00390C_A:BNA32:GRE2:C2_07270W_A:PST2:GPD1:ILV2:CCP1:HIS5:PYC2:LYS4:SCS7:ARO9:OYE32:GLR1:GRP2:ILV5:EBP1:OYE2:OYE23:LEU1:OYE22:LYS12:DRE2:PDX3:DIT2:YCP4:PST3:CR_09010C_A	51536:9374:16638:3955:5506:51287:50625:16491:4409:16972:3690:1990412:4043:287:4096:1990411:4736:5515:36137:8677:3984:47046:5496:5524:8793:4362:20037:4733:50660:4601:4400:47964:16616:50661:4367:3959:51539:4121:3756:4130:31177:9055:3677:47804:16671:42803:3824:8144:19825:4497:3861:30976:47536:4075:4345:16705:4455:10181:80132:4412:50662:42602:15035:51537:42562:30170
50662	coenzyme binding	29 out of 253 genes, 11.5%	152 out of 6473 background genes, 2.3%	1.12e-10	0	HOM6:C1_02970W_A:GOR1:C1_05990C_A:ZWF1:ERO1:C2_00390C_A:BNA32:GRE2:C2_07270W_A:PST2:GPD1:ILV2:HIS5:PYC2:ARO9:OYE32:GLR1:GRP2:ILV5:EBP1:OYE2:OYE23:OYE22:LYS12:PDX3:YCP4:PST3:CR_09010C_A	9374:16638:3955:51287:50625:16491:16972:3690:1990412:287:1990411:4736:36137:8677:3984:47046:5496:5524:8793:4362:4733:50660:4400:47964:16616:50661:4367:3959:4121:3756:3677:47804:16671:42803:3824:8144:30976:47536:4075:4345:4455:10181:4412:50662:42602:15035:42562:30170
16209	antioxidant activity	13 out of 253 genes, 5.1%	32 out of 6473 background genes, 0.5%	1.4e-08	0	TTR1:CAT1:GPX3:C2_05060C_A:CCP1:GTT12:TSA1:TSA1B:GLR1:TRR1:GPX2:C6_00850W_A:TRX1	43022:8198:15036:8379:4364:4791:51920:32542:4096:5515:4362:20037:50660:4601:50661:15038:4130:9055:47066:3677:4602:16209:51082:19207:30985:15035
4601	peroxidase activity	9 out of 253 genes, 3.6%	17 out of 6473 background genes, 0.3%	7.34e-07	0	TTR1:CAT1:GPX3:CCP1:GTT12:TSA1:TSA1B:GPX2:C6_00850W_A	43022:15036:8379:4364:51920:4096:5515:20037:4601:15038:4130:9055:47066:4602:51082:19207:30985:15035
16684	oxidoreductase activity, acting on peroxide as acceptor	9 out of 253 genes, 3.6%	18 out of 6473 background genes, 0.3%	1.42e-06	0	TTR1:CAT1:GPX3:CCP1:GTT12:TSA1:TSA1B:GPX2:C6_00850W_A	43022:15036:8379:4364:51920:4096:5515:20037:4601:15038:4130:9055:47066:4602:51082:19207:30985:15035
10181	FMN binding	10 out of 253 genes, 4.0%	24 out of 6473 background genes, 0.4%	1.81e-06	0	C2_07270W_A:PST2:OYE32:EBP1:OYE2:OYE23:OYE22:PDX3:YCP4:PST3	16638:3955:50625:16491:5496:4733:3959:3824:8144:10181:42602:42562
16616	oxidoreductase activity, acting on the CH-OH group of donors, NAD or NADP as acceptor	13 out of 253 genes, 5.1%	69 out of 6473 background genes, 1.1%	0.00042	0	HOM6:GOR1:CSH1:IFD6:LPG20:C1_05990C_A:ZWF1:GPD1:GRP2:ADH1:ILV5:LYS12:CR_09100C_A	19170:18456:51287:8270:4090:16491:50236:16747:3690:4033:5515:8677:47046:4022:47964:16616:50661:4367:42803:4345:4455:4412:50662
16614	oxidoreductase activity, acting on CH-OH group of donors	13 out of 253 genes, 5.1%	73 out of 6473 background genes, 1.1%	0.00083	0	HOM6:GOR1:CSH1:IFD6:LPG20:C1_05990C_A:ZWF1:GPD1:GRP2:ADH1:ILV5:LYS12:CR_09100C_A	19170:18456:51287:8270:4090:16491:50236:16747:3690:4033:5515:8677:47046:4022:47964:16616:50661:4367:42803:4345:4455:4412:50662
4602	glutathione peroxidase activity	5 out of 253 genes, 2.0%	8 out of 6473 background genes, 0.1%	0.00095	0	TTR1:GPX3:GTT12:GPX2:C6_00850W_A	15036:8379:4364:15038:9055:47066:4602:15035
16651	oxidoreductase activity, acting on NAD(P)H	10 out of 253 genes, 4.0%	48 out of 6473 background genes, 0.7%	0.00263	0	C1_05180C_A:C2_07070W_A:PST2:GLR1:TRR1:EBP1:OYE2:DIT2:YCP4:PST3	3955:5506:8270:8198:50625:16491:16747:4791:35925:3960:5496:8137:20037:4362:50660:50661:3959:9055:3824:8144:19825:4497:16705:10181:32440:42562
18456	aryl-alcohol dehydrogenase (NAD+) activity	3 out of 253 genes, 1.2%	3 out of 6473 background genes, 0.0%	0.01269	0.0017	CSH1:IFD6:LPG20	18456:16491
3959	NADPH dehydrogenase activity	3 out of 253 genes, 1.2%	3 out of 6473 background genes, 0.0%	0.01269	0.0015	EBP1:OYE2:DIT2	5506:16491:5496:20037:3959:9055:3824:8144:19825:4497:16705:10181:42562
1901618	organic hydroxy compound transmembrane transporter activity	4 out of 253 genes, 1.6%	7 out of 6473 background genes, 0.1%	0.01562	0.0029	ITR1:JEN1:ARR3:MDR1	5365:51119:15105:5355:15297:97079:8028:15306:42910:15355:15244:15129:8508:15104
4364	glutathione transferase activity	4 out of 253 genes, 1.6%	7 out of 6473 background genes, 0.1%	0.01562	0.0027	TTR1:GTT12:GTT11:GST2	15036:4364:15038:9055:4602:15035
19842	vitamin binding	9 out of 253 genes, 3.6%	52 out of 6473 background genes, 0.8%	0.03343	0.0038	LYS2:C1_02970W_A:C2_00390C_A:BNA32:ILV2:HIS5:PYC2:ARO9:CR_09010C_A	9374:1990412:4043:287:1990411:4736:36137:3984:5524:8793:50660:4400:4121:31177:3677:47804:3824:30976:47536:4075:30170
15036	disulfide oxidoreductase activity	5 out of 253 genes, 2.0%	15 out of 6473 background genes, 0.2%	0.04101	0.0035	TTR1:ERO1:GLR1:TRR1:TRX1	8198:16972:15036:4364:4791:4362:50660:50661:15038:3756:9055:16671:4602:16209:15035
3955	NAD(P)H dehydrogenase (quinone) activity	3 out of 253 genes, 1.2%	4 out of 6473 background genes, 0.1%	0.04929	0.0078	PST2:YCP4:PST3	3955:50625:16491:10181
Cellular component
GOID	GO_term	Cluster frequency	Background frequency	Corrected P-value	False discovery rate	Gene(s) annotated to the term	Directly Annotated GOID List
30446	hyphal cell wall	14 out of 253 genes, 5.5%	69 out of 6473 background genes, 1.1%	4.98e-05	0	CSH1:HYR1:CDC19:PST2:GLX3:TSA1:TSA1B:FBA1:HWP1:PHR1:ADH1:EBP1:ALS1:INO1	5737:5622:9986:5829:5739:46658:324:932:33101:5621:5886:5844:9277:5634:30428:5937:30445:10494:5576:45121:30446:62040
31012	extracellular matrix	13 out of 253 genes, 5.1%	74 out of 6473 background genes, 1.1%	0.00073	0	TTR1:C1_03510C_A:NIT3:GLX3:THR4:TRR1:GRP2:ADH1:CIP1:SAP5:PST3:PGI1:TRX1	5622:5737:9986:5829:5758:5739:324:932:16021:5886:9277:9279:31934:16020:5634:30445:10494:5576:45121:30446:62040
44421	extracellular region part	13 out of 253 genes, 5.1%	74 out of 6473 background genes, 1.1%	0.00073	0	TTR1:C1_03510C_A:NIT3:GLX3:THR4:TRR1:GRP2:ADH1:CIP1:SAP5:PST3:PGI1:TRX1	5622:5737:9986:5829:5758:5739:324:932:16021:5886:9277:9279:31934:16020:5634:30445:10494:5576:45121:30446:62040
62039	biofilm matrix	13 out of 253 genes, 5.1%	74 out of 6473 background genes, 1.1%	0.00073	0	TTR1:C1_03510C_A:NIT3:GLX3:THR4:TRR1:GRP2:ADH1:CIP1:SAP5:PST3:PGI1:TRX1	5622:5737:9986:5829:5758:5739:324:932:16021:5886:9277:9279:31934:16020:5634:30445:10494:5576:45121:30446:62040
62040	fungal biofilm matrix	13 out of 253 genes, 5.1%	74 out of 6473 background genes, 1.1%	0.00073	0	TTR1:C1_03510C_A:NIT3:GLX3:THR4:TRR1:GRP2:ADH1:CIP1:SAP5:PST3:PGI1:TRX1	5622:5737:9986:5829:5758:5739:324:932:16021:5886:9277:9279:31934:16020:5634:30445:10494:5576:45121:30446:62040
30312	external encapsulating structure	19 out of 253 genes, 7.5%	164 out of 6473 background genes, 2.5%	0.00304	0	C1_03510C_A:CSH1:GPM2:CAT1:C1_13290W_A:HYR1:CDC19:PST2:GLX3:TSA1:TSA1B:FBA1:HWP1:PHR1:GAP1:ADH1:EBP1:ALS1:INO1	5737:5622:5628:9986:5829:5739:32178:5619:46658:5782:324:932:33101:16021:5621:5886:5759:5844:9277:9279:32153:5634:30428:5937:30445:10494:5576:31520:45121:30446:62040
5618	cell wall	18 out of 253 genes, 7.1%	163 out of 6473 background genes, 2.5%	0.00966	0	CSH1:GPM2:CAT1:C1_13290W_A:HYR1:CDC19:PST2:GLX3:TSA1:TSA1B:FBA1:HWP1:PHR1:GAP1:ADH1:EBP1:ALS1:INO1	5737:5622:5628:9986:5829:5739:32178:5619:46658:5782:324:932:33101:16021:5621:5886:5759:5844:9277:32153:5634:30428:5937:30445:10494:5576:31520:45121:30446:62040
9277	fungal-type cell wall	18 out of 253 genes, 7.1%	163 out of 6473 background genes, 2.5%	0.00966	0	CSH1:GPM2:CAT1:C1_13290W_A:HYR1:CDC19:PST2:GLX3:TSA1:TSA1B:FBA1:HWP1:PHR1:GAP1:ADH1:EBP1:ALS1:INO1	5737:5622:5628:9986:5829:5739:32178:5619:46658:5782:324:932:33101:16021:5621:5886:5759:5844:9277:32153:5634:30428:5937:30445:10494:5576:31520:45121:30446:62040
Downregulated gene set
Biological process
GOID	GO_term	Cluster frequency	Background frequency	Corrected P-value	False discovery rate	Gene(s) annotated to the term	Directly Annotated GOID List
55085	transmembrane transport	27 out of 129 genes, 20.9%	365 out of 6473 background genes, 5.6%	9.88e-07	0	HGT1:HAK1:GAP4:FTR1:LEU5:KAR2:C2_06520C_A:SMF12:SIT1:C2_09510C_A:HGT19:NGT1:PMA1:OPT7:MAL31:FET34:YHM2:CAN1:HGT10:OPT1:HXT5:CR_03580C_A:HGT16:CR_08610W_A:PEX13:GNP3:CR_10640W_A	36178:19740:6813:15802:35672:15891:33215:30447:6631:30433:6843:55085:6842:6754:10106:6876:70880:55114:15691:16558:71805:6855:71281:34605:742:15867:30026:36498:51453:120029:6825:15866:36244:44117:16560:36168:6457:71421:2:36180:45916:1904659:1902600:1904263:31204:6828:8645:15805:6812:6850:15742:15793:8643:6986:30001:34755:1901583:6826:46688:6616:6857:15880:3333:44718:42928:15809:34775:42939:1901684…
6811	ion transport	21 out of 129 genes, 16.3%	293 out of 6473 background genes, 4.5%	0.00014	0	ANT1:HAK1:GAP4:C1_13840W_A:FTR1:LEU5:C2_06520C_A:SMF12:SIT1:C2_09510C_A:PMA1:RBT5:OPT7:C4_00990W_A:FRE10:C4_06370C_A:C5_03470C_A:FET34:YHM2:CAN1:CR_08610W_A	15807:43709:6813:6635:15802:15891:33215:6631:6843:55085:6842:6754:6820:10106:6876:55114:15691:6877:71805:71281:20028:15867:30026:51453:46713:120029:6825:15866:6623:44117:6824:71421:2:36180:1902600:1904263:6828:6812:15805:6850:15742:44011:30001:34755:46688:6826:15809:42928:44718:15880:3333:42939:34775:7031:1901684:1990545:1902906:36170:6879:35690:9405:6878:6839
46916	cellular transition metal ion homeostasis	11 out of 129 genes, 8.5%	78 out of 6473 background genes, 1.2%	0.00017	0	C1_13840W_A:FTR1:RIM101:SMF12:SIT1:RBT5:CSR1:CFL2:C6_00340C_A:FET34:MAC1	71469:1410:36178:1900439:43709:45944:15891:33215:2000220:30447:44416:55085:71454:9272:71280:6882:10106:1900231:6876:55114:71216:15691:6877:71281:20028:71467:50821:30026:71579:51321:71285:45732:6825:36244:30437:6627:1900430:44117:6824:71421:44182:36180:1900461:44409:6828:6355:34225:9267:44011:122:97236:30001:34755:46688:6826:42928:44718:36177:10973:7165:2666:1901684:36171:6508:36170:6357:6879:3569…
55076	transition metal ion homeostasis	11 out of 129 genes, 8.5%	81 out of 6473 background genes, 1.3%	0.00026	0	C1_13840W_A:FTR1:RIM101:SMF12:SIT1:RBT5:CSR1:CFL2:C6_00340C_A:FET34:MAC1	71469:1410:36178:1900439:43709:45944:15891:33215:2000220:30447:44416:55085:71454:9272:71280:6882:10106:1900231:6876:55114:71216:15691:6877:71281:20028:71467:50821:30026:71579:51321:71285:45732:6825:36244:30437:6627:1900430:44117:6824:71421:44182:36180:1900461:44409:6828:6355:34225:9267:44011:122:97236:30001:34755:46688:6826:42928:44718:36177:10973:7165:2666:1901684:36171:6508:36170:6357:6879:3569…
6875	cellular metal ion homeostasis	12 out of 129 genes, 9.3%	104 out of 6473 background genes, 1.6%	0.00047	0	ADE5,7:C1_13840W_A:FTR1:RIM101:SMF12:SIT1:RBT5:CSR1:CFL2:C6_00340C_A:FET34:MAC1	71469:1410:36178:1900439:43709:45944:15891:33215:2000220:30447:44416:55085:71454:9272:71280:6882:10106:1900231:6876:55114:71216:15691:6877:71281:20028:71467:9113:50821:30026:71579:51321:71285:45732:6825:36244:30437:6627:1900430:44117:6824:71421:44182:36180:1900461:44409:46084:6828:6355:34225:9267:44011:122:97236:30001:34755:46688:6826:6875:42928:44718:6189:36177:10973:7165:2666:1901684:36171:6508…
55065	metal ion homeostasis	12 out of 129 genes, 9.3%	111 out of 6473 background genes, 1.7%	0.00096	0	ADE5,7:C1_13840W_A:FTR1:RIM101:SMF12:SIT1:RBT5:CSR1:CFL2:C6_00340C_A:FET34:MAC1	71469:1410:36178:1900439:43709:45944:15891:33215:2000220:30447:44416:55085:71454:9272:71280:6882:10106:1900231:6876:55114:71216:15691:6877:71281:20028:71467:9113:50821:30026:71579:51321:71285:45732:6825:36244:30437:6627:1900430:44117:6824:71421:44182:36180:1900461:44409:46084:6828:6355:34225:9267:44011:122:97236:30001:34755:46688:6826:6875:42928:44718:6189:36177:10973:7165:2666:1901684:36171:6508…
30003	cellular cation homeostasis	13 out of 129 genes, 10.1%	135 out of 6473 background genes, 2.1%	0.00132	0	ADE5,7:C1_13840W_A:FTR1:RIM101:SMF12:SIT1:PMA1:RBT5:CSR1:CFL2:C6_00340C_A:FET34:MAC1	71469:1410:36178:1900439:43709:45944:15891:33215:2000220:30447:44416:55085:71454:9272:71280:6882:6754:10106:1900231:6876:55114:71216:15691:6877:71281:20028:71467:9113:50821:30026:71579:51321:71285:51453:45732:120029:6825:36244:30437:6627:1900430:44117:6824:71421:44182:36180:1900461:44409:1902600:1904263:46084:6828:6355:34225:6812:9267:44011:122:97236:30001:34755:46688:6826:6875:42928:44718:6189:3…
98771	inorganic ion homeostasis	13 out of 129 genes, 10.1%	138 out of 6473 background genes, 2.1%	0.00169	0	ADE5,7:C1_13840W_A:FTR1:RIM101:SMF12:SIT1:PMA1:RBT5:CSR1:CFL2:C6_00340C_A:FET34:MAC1	71469:1410:36178:1900439:43709:45944:15891:33215:2000220:30447:44416:55085:71454:9272:71280:6882:6754:10106:1900231:6876:55114:71216:15691:6877:71281:20028:71467:9113:50821:30026:71579:51321:71285:51453:45732:120029:6825:36244:30437:6627:1900430:44117:6824:71421:44182:36180:1900461:44409:1902600:1904263:46084:6828:6355:34225:6812:9267:44011:122:97236:30001:34755:46688:6826:6875:42928:44718:6189:3…
55080	cation homeostasis	13 out of 129 genes, 10.1%	141 out of 6473 background genes, 2.2%	0.00216	0	ADE5,7:C1_13840W_A:FTR1:RIM101:SMF12:SIT1:PMA1:RBT5:CSR1:CFL2:C6_00340C_A:FET34:MAC1	71469:1410:36178:1900439:43709:45944:15891:33215:2000220:30447:44416:55085:71454:9272:71280:6882:6754:10106:1900231:6876:55114:71216:15691:6877:71281:20028:71467:9113:50821:30026:71579:51321:71285:51453:45732:120029:6825:36244:30437:6627:1900430:44117:6824:71421:44182:36180:1900461:44409:1902600:1904263:46084:6828:6355:34225:6812:9267:44011:122:97236:30001:34755:46688:6826:6875:42928:44718:6189:3…
6873	cellular ion homeostasis	13 out of 129 genes, 10.1%	142 out of 6473 background genes, 2.2%	0.00233	0	ADE5,7:C1_13840W_A:FTR1:RIM101:SMF12:SIT1:PMA1:RBT5:CSR1:CFL2:C6_00340C_A:FET34:MAC1	71469:1410:36178:1900439:43709:45944:15891:33215:2000220:30447:44416:55085:71454:9272:71280:6882:6754:10106:1900231:6876:55114:71216:15691:6877:71281:20028:71467:9113:50821:30026:71579:51321:71285:51453:45732:120029:6825:36244:30437:6627:1900430:44117:6824:71421:44182:36180:1900461:44409:1902600:1904263:46084:6828:6355:34225:6812:9267:44011:122:97236:30001:34755:46688:6826:6875:42928:44718:6189:3…
51181	cofactor transport	6 out of 129 genes, 4.7%	23 out of 6473 background genes, 0.4%	0.00238	0	GAP4:LEU5:C2_06520C_A:RBT5:OPT7:YHM2	43709:6843:55085:6842:20028:2:15805:15742:44011:15880:3333:42939:34775:1990545:6879
6810	transport	41 out of 129 genes, 31.8%	1039 out of 6473 background genes, 16.1%	0.00318	0	HGT1:PIL1:ANT1:HAK1:GAP4:C1_09430W_A:C1_13840W_A:FTR1:DDI1:LEU5:KAR2:C2_06520C_A:SMF12:SIT1:C2_09510C_A:HGT19:NGT1:PMA1:RBT5:OPT7:C4_00990W_A:FRE10:C4_06370C_A:VPS1:C5_03470C_A:MAL31:RER2:C6_00340C_A:FET34:YHM2:CAN1:HGT10:RVS161:OPT1:HXT5:CR_03580C_A:HGT16:CR_08610W_A:PEX13:GNP3:CR_10640W_A	15807:36178:30036:43709:19740:6813:6635:15802:35672:15891:33215:30447:6631:30433:6843:55085:6842:9306:60988:6754:6888:6820:10106:6876:70880:43328:6486:71216:55114:15691:6877:7034:16558:71805:6855:71281:20028:50821:742:34605:15867:30026:51666:45053:31505:19408:6970:36498:51453:42594:46713:120029:6825:6893:15866:36244:6627:6623:44117:16560:6824:71421:6457:36168:44182:2:36180:45916:6511:1902600:1904…
6820	anion transport	14 out of 129 genes, 10.9%	172 out of 6473 background genes, 2.7%	0.00392	0	ANT1:GAP4:FTR1:LEU5:C2_06520C_A:SIT1:C2_09510C_A:OPT7:C4_06370C_A:C5_03470C_A:FET34:YHM2:CAN1:CR_08610W_A	15807:6635:15802:15891:33215:6631:6843:55085:6842:6820:10106:55114:71281:15867:46713:15866:6623:44117:2:36180:15805:6850:15742:34755:46688:6826:15809:42928:44718:15880:3333:42939:34775:7031:1901684:1990545:36170:35690:9405:6839
50801	ion homeostasis	13 out of 129 genes, 10.1%	153 out of 6473 background genes, 2.4%	0.00534	0.0029	ADE5,7:C1_13840W_A:FTR1:RIM101:SMF12:SIT1:PMA1:RBT5:CSR1:CFL2:C6_00340C_A:FET34:MAC1	71469:1410:36178:1900439:43709:45944:15891:33215:2000220:30447:44416:55085:71454:9272:71280:6882:6754:10106:1900231:6876:55114:71216:15691:6877:71281:20028:71467:9113:50821:30026:71579:51321:71285:51453:45732:120029:6825:36244:30437:6627:1900430:44117:6824:71421:44182:36180:1900461:44409:1902600:1904263:46084:6828:6355:34225:6812:9267:44011:122:97236:30001:34755:46688:6826:6875:42928:44718:6189:3…
33212	iron import into cell	4 out of 129 genes, 3.1%	8 out of 6473 background genes, 0.1%	0.00553	0.0027	FTR1:SIT1:RBT5:FET34	43709:15891:33215:55085:10106:55114:71281:20028:44117:36180:44011:34755:46688:6826:42928:44718:1901684:36170:6879:35690:9405
51234	establishment of localization	41 out of 129 genes, 31.8%	1068 out of 6473 background genes, 16.5%	0.00639	0.0025	HGT1:PIL1:ANT1:HAK1:GAP4:C1_09430W_A:C1_13840W_A:FTR1:DDI1:LEU5:KAR2:C2_06520C_A:SMF12:SIT1:C2_09510C_A:HGT19:NGT1:PMA1:RBT5:OPT7:C4_00990W_A:FRE10:C4_06370C_A:VPS1:C5_03470C_A:MAL31:RER2:C6_00340C_A:FET34:YHM2:CAN1:HGT10:RVS161:OPT1:HXT5:CR_03580C_A:HGT16:CR_08610W_A:PEX13:GNP3:CR_10640W_A	15807:36178:30036:43709:19740:6813:6635:15802:35672:15891:33215:30447:6631:30433:6843:55085:6842:9306:60988:6754:6888:6820:10106:6876:70880:43328:6486:71216:55114:15691:6877:7034:16558:71805:6855:71281:20028:50821:742:34605:15867:30026:51666:45053:31505:19408:6970:36498:51453:42594:46713:120029:6825:6893:15866:36244:6627:6623:44117:16560:6824:71421:6457:36168:44182:2:36180:45916:6511:1902600:1904…
55082	cellular chemical homeostasis	13 out of 129 genes, 10.1%	160 out of 6473 background genes, 2.5%	0.00869	0.0024	ADE5,7:C1_13840W_A:FTR1:RIM101:SMF12:SIT1:PMA1:RBT5:CSR1:CFL2:C6_00340C_A:FET34:MAC1	71469:1410:36178:1900439:43709:45944:15891:33215:2000220:30447:44416:55085:71454:9272:71280:6882:6754:10106:1900231:6876:55114:71216:15691:6877:71281:20028:71467:9113:50821:30026:71579:51321:71285:51453:45732:120029:6825:36244:30437:6627:1900430:44117:6824:71421:44182:36180:1900461:44409:1902600:1904263:46084:6828:6355:34225:6812:9267:44011:122:97236:30001:34755:46688:6826:6875:42928:44718:6189:3…
6826	iron ion transport	6 out of 129 genes, 4.7%	29 out of 6473 background genes, 0.4%	0.01016	0.0022	FTR1:SMF12:SIT1:RBT5:FRE10:FET34	43709:15891:33215:55085:10106:6876:55114:15691:71281:20028:30026:6825:44117:71421:36180:6828:44011:30001:34755:46688:6826:42928:44718:1901684:36170:6879:35690:9405:6878
41	transition metal ion transport	7 out of 129 genes, 5.4%	45 out of 6473 background genes, 0.7%	0.01432	0.0021	C1_13840W_A:FTR1:SMF12:SIT1:RBT5:FRE10:FET34	43709:15891:33215:55085:10106:6876:55114:15691:6877:71281:20028:30026:6825:44117:6824:71421:36180:6828:44011:30001:34755:46688:6826:42928:44718:1901684:36170:6879:35690:9405:6878
30001	metal ion transport	9 out of 129 genes, 7.0%	80 out of 6473 background genes, 1.2%	0.01471	0.002	HAK1:C1_13840W_A:FTR1:SMF12:SIT1:RBT5:C4_00990W_A:FRE10:FET34	43709:6813:15891:33215:55085:10106:6876:55114:15691:6877:71805:71281:20028:30026:6825:44117:6824:71421:36180:6828:44011:30001:34755:46688:6826:42928:44718:1901684:36170:6879:35690:9405:6878
6879	cellular iron ion homeostasis	7 out of 129 genes, 5.4%	46 out of 6473 background genes, 0.7%	0.01662	0.0029	FTR1:RIM101:SIT1:RBT5:CFL2:C6_00340C_A:FET34	71469:1410:36178:1900439:43709:45944:15891:33215:30447:44416:55085:71454:9272:71280:10106:55114:71216:71281:20028:71467:50821:51321:71285:36244:30437:6627:1900430:44117:44182:36180:44409:6355:44011:122:34755:46688:6826:42928:44718:36177:10973:7165:2666:1901684:36171:36170:6508:6357:6879:35690:9405
19725	cellular homeostasis	14 out of 129 genes, 10.9%	201 out of 6473 background genes, 3.1%	0.02309	0.0027	ADE5,7:C1_13840W_A:FTR1:RIM101:SMF12:SIT1:PMA1:RBT5:CSR1:CFL2:C6_00340C_A:FET34:MAC1:PRX1	71469:1410:36178:1900439:43709:45944:15891:33215:2000220:30447:44416:55085:45454:71454:9272:71280:6882:6754:10106:1900231:6876:55114:71216:15691:6877:71281:20028:71467:9113:50821:30026:71579:51321:71285:51453:45732:120029:46686:6825:36244:30437:6627:1900430:44117:6824:71421:44182:36180:1900461:44409:1902600:1904263:46084:6828:6355:34225:6812:34599:9267:44011:122:97236:30001:34755:46688:6826:6875:…
55072	iron ion homeostasis	7 out of 129 genes, 5.4%	49 out of 6473 background genes, 0.8%	0.02538	0.0043	FTR1:RIM101:SIT1:RBT5:CFL2:C6_00340C_A:FET34	71469:1410:36178:1900439:43709:45944:15891:33215:30447:44416:55085:71454:9272:71280:10106:55114:71216:71281:20028:71467:50821:51321:71285:36244:30437:6627:1900430:44117:44182:36180:44409:6355:44011:122:34755:46688:6826:42928:44718:36177:10973:7165:2666:1901684:36171:36170:6508:6357:6879:35690:9405
8643	carbohydrate transport	6 out of 129 genes, 4.7%	34 out of 6473 background genes, 0.5%	0.02651	0.0042	HGT1:HGT19:MAL31:HGT10:HXT5:HGT16	36178:30447:55085:34605:36244:36168:45916:1904659:8645:15793:8643:35690
48878	chemical homeostasis	13 out of 129 genes, 10.1%	180 out of 6473 background genes, 2.8%	0.03033	0.004	ADE5,7:C1_13840W_A:FTR1:RIM101:SMF12:SIT1:PMA1:RBT5:CSR1:CFL2:C6_00340C_A:FET34:MAC1	71469:1410:36178:1900439:43709:45944:15891:33215:2000220:30447:44416:55085:71454:9272:71280:6882:6754:10106:1900231:6876:55114:71216:15691:6877:71281:20028:71467:9113:50821:30026:71579:51321:71285:51453:45732:120029:6825:36244:30437:6627:1900430:44117:6824:71421:44182:36180:1900461:44409:1902600:1904263:46084:6828:6355:34225:6812:9267:44011:122:97236:30001:34755:46688:6826:6875:42928:44718:6189:3…
34220	ion transmembrane transport	11 out of 129 genes, 8.5%	133 out of 6473 background genes, 2.1%	0.03442	0.0038	HAK1:GAP4:FTR1:C2_06520C_A:SMF12:SIT1:PMA1:OPT7:FET34:YHM2:CR_08610W_A	6813:15891:33215:6843:55085:6842:6754:10106:6876:55114:15691:71805:71281:30026:51453:120029:6825:44117:71421:2:36180:1902600:1904263:6828:6812:15805:6850:15742:30001:34755:46688:6826:42928:44718:3333:42939:34775:1901684:1990545:1902906:36170:35690:9405:6878
6812	cation transport	12 out of 129 genes, 9.3%	160 out of 6473 background genes, 2.5%	0.04133	0.0044	HAK1:C1_13840W_A:FTR1:C2_06520C_A:SMF12:SIT1:PMA1:RBT5:C4_00990W_A:FRE10:FET34:CAN1	43709:6813:15802:15891:33215:55085:6754:10106:6876:55114:15691:6877:71805:71281:20028:30026:51453:120029:6825:44117:6824:71421:36180:1902600:1904263:6828:6812:44011:30001:34755:46688:6826:15809:42928:44718:1901684:1990545:1902906:36170:6879:35690:9405:6878
15711	organic anion transport	11 out of 129 genes, 8.5%	137 out of 6473 background genes, 2.1%	0.04514	0.005	ANT1:GAP4:LEU5:C2_06520C_A:SIT1:C2_09510C_A:OPT7:C5_03470C_A:YHM2:CAN1:CR_08610W_A	15807:6635:15802:15891:6631:6843:55085:6842:15867:15866:2:15805:6850:15742:15809:42928:44718:15880:3333:42939:34775:7031:1990545:35690:6839
Molecular function
GOID	GO_term	Cluster frequency	Background frequency	Corrected P-value	False discovery rate	Gene(s) annotated to the term	Directly Annotated GOID List
22857	transmembrane transporter activity	29 out of 129 genes, 22.5%	354 out of 6473 background genes, 5.5%	4.64e-09	0	HGT1:ANT1:HAK1:GAP4:C1_13840W_A:FTR1:LEU5:C2_06520C_A:SMF12:SIT1:C2_09510C_A:HGT19:NGT1:PMA1:OPT7:C4_00990W_A:C4_06370C_A:C5_03470C_A:MAL31:FET34:YHM2:CAN1:HGT10:OPT1:HXT5:CR_03580C_A:HGT16:CR_08610W_A:CR_10640W_A	1901691:42910:50833:5506:15093:5507:166:42937:15179:8553:15181:51119:42929:5355:15174:5290:3677:46873:4322:16597:15297:16887:35673:15572:5509:1904680:5471:295:15343:46872:15228:15295:90422:15079:5427:61840:80139:15189:15171:5371:5381:22890:22857:1901584
5215	transporter activity	29 out of 129 genes, 22.5%	393 out of 6473 background genes, 6.1%	5.84e-08	0	HGT1:ANT1:HAK1:GAP4:C1_13840W_A:FTR1:LEU5:C2_06520C_A:SMF12:SIT1:C2_09510C_A:HGT19:NGT1:PMA1:OPT7:C4_00990W_A:C4_06370C_A:C5_03470C_A:MAL31:FET34:YHM2:CAN1:HGT10:OPT1:HXT5:CR_03580C_A:HGT16:CR_08610W_A:CR_10640W_A	1901691:42910:50833:5506:15093:5507:166:42937:15179:8553:15181:51119:42929:5355:15174:5290:3677:46873:4322:16597:15297:16887:35673:15572:5509:1904680:5471:295:15343:46872:15228:15295:90422:15079:5427:61840:80139:15189:5371:15171:5381:22890:22857:1901584
15075	ion transmembrane transporter activity	18 out of 129 genes, 14.0%	229 out of 6473 background genes, 3.5%	7.33e-05	0	HAK1:GAP4:C1_13840W_A:FTR1:LEU5:C2_06520C_A:SMF12:SIT1:C2_09510C_A:PMA1:C4_00990W_A:C4_06370C_A:C5_03470C_A:FET34:YHM2:CAN1:HGT10:CR_08610W_A	1901691:50833:5506:15093:5507:166:15179:8553:15181:51119:42929:5355:15174:5290:3677:46873:4322:16597:16887:5509:5471:15343:46872:15228:15295:90422:15079:61840:80139:15189:5371:15171:5381:22890:22857
51119	sugar transmembrane transporter activity	6 out of 129 genes, 4.7%	25 out of 6473 background genes, 0.4%	0.00102	0	HGT1:HGT19:MAL31:HGT10:HXT5:HGT16	51119:5355:15295
15144	carbohydrate transmembrane transporter activity	6 out of 129 genes, 4.7%	26 out of 6473 background genes, 0.4%	0.00131	0	HGT1:HGT19:MAL31:HGT10:HXT5:HGT16	51119:5355:15295
8514	organic anion transmembrane transporter activity	9 out of 129 genes, 7.0%	77 out of 6473 background genes, 1.2%	0.00273	0	GAP4:LEU5:C2_06520C_A:SIT1:C2_09510C_A:C5_03470C_A:YHM2:CAN1:CR_08610W_A	50833:15179:15181:42929:15174:5290:3677:16597:5509:5471:15343:15228:90422:15189:5371:15171:22857
8509	anion transmembrane transporter activity	10 out of 129 genes, 7.8%	109 out of 6473 background genes, 1.7%	0.00793	0.0029	GAP4:LEU5:C2_06520C_A:SIT1:C2_09510C_A:C4_06370C_A:C5_03470C_A:YHM2:CAN1:CR_08610W_A	50833:15179:15181:42929:15174:5290:3677:16597:5509:5471:15343:15228:90422:80139:15189:5371:15171:22857
15318	inorganic molecular entity transmembrane transporter activity	14 out of 129 genes, 10.9%	210 out of 6473 background genes, 3.2%	0.00949	0.0025	HAK1:GAP4:C1_13840W_A:FTR1:SMF12:PMA1:C4_00990W_A:C4_06370C_A:C5_03470C_A:FET34:YHM2:CAN1:HGT10:CR_08610W_A	1901691:50833:5506:15093:5507:166:15179:8553:15181:51119:5355:15174:5290:3677:46873:4322:16597:16887:46872:15295:15079:61840:80139:15189:5371:15171:5381:22890
5507	copper ion binding	5 out of 129 genes, 3.9%	26 out of 6473 background genes, 0.4%	0.01941	0.0111	SOD5:FET34:FET99:FET31:MAC1	5507:16491:3677:3700:4322:987:1228:4784:5381
295	adenine nucleotide transmembrane transporter activity	3 out of 129 genes, 2.3%	6 out of 6473 background genes, 0.1%	0.02102	0.012	ANT1:LEU5:C2_09510C_A	5509:5471:295:15228:22857
15216	purine nucleotide transmembrane transporter activity	3 out of 129 genes, 2.3%	7 out of 6473 background genes, 0.1%	0.03625	0.0218	ANT1:LEU5:C2_09510C_A	5509:5471:295:15228:22857
Cellular component
GOID	GO_term	Cluster frequency	Background frequency	Corrected P-value	False discovery rate	Gene(s) annotated to the term	Directly Annotated GOID List
71944	cell periphery	39 out of 129 genes, 30.2%	754 out of 6473 background genes, 11.6%	1.04e-06	0	RIM8:HGT1:XOG1:GAP4:FTR1:MDG1:DDI1:SOD5:KAR2:SMF12:SIT1:HGT19:BNA4:NGT1:PMA1:RBT5:PGA62:FRE10:C4_06370C_A:VPS1:HSP12:C5_02110W_A:FET34:FET99:FET31:YHM2:CAN1:HGT10:ALS4:ALS2:RVS161:SAC7:C7_00190W_A:OPT1:ERG25:ISC1:HGT16:CR_08610W_A:SLP3	33573:9986:99020:5789:99021:31965:42645:324:31966:51286:1990528:329:16021:5886:5770:34099:5887:9898:30445:30446:31307:51285:5622:5737:5768:5829:328:31097:1990819:31410:5783:5777:5739:5794:5938:30479:71944:5788:935:5743:9277:16020:5634:5937:5576:45121
5886	plasma membrane	28 out of 129 genes, 21.7%	509 out of 6473 background genes, 7.9%	6.64e-05	0	RIM8:HGT1:GAP4:FTR1:MDG1:DDI1:SMF12:SIT1:HGT19:BNA4:NGT1:PMA1:RBT5:FRE10:C4_06370C_A:C5_02110W_A:FET34:FET99:FET31:YHM2:CAN1:HGT10:OPT1:ERG25:ISC1:HGT16:CR_08610W_A:SLP3	33573:9986:5789:42645:324:31966:16021:5886:5887:9898:30445:30446:31307:5737:5768:5829:328:31410:5783:5739:5794:71944:5743:9277:16020:5634:5576:45121
16020	membrane	49 out of 129 genes, 38.0%	1309 out of 6473 background genes, 20.2%	0.00025	0	RIM8:HGT1:ANT1:HAK1:GAP4:C1_09430W_A:C1_13840W_A:FTR1:MDG1:DDI1:LEU5:KAR2:C2_06520C_A:SMF12:SIT1:HGT19:BNA4:NGT1:PMA1:ATO1:RBT5:C4_00990W_A:FRE10:C4_06370C_A:VPS1:C5_02110W_A:C5_03470C_A:MAL31:RER2:FET34:FET99:FET31:YHM2:CAN1:HGT10:IHD1:RVS161:C7_01950W_A:OPT1:ERG25:HXT5:CR_03580C_A:ISC1:HGT16:CR_08610W_A:PEX13:SLP3:GNP3:CR_10640W_A	33573:9986:99020:5789:99021:31965:42645:324:31966:1990528:329:16021:5886:1904423:5770:1990429:34099:5887:9898:5811:30445:1990415:30446:31307:51285:5737:5768:5829:328:31097:31410:5739:5777:5783:5794:30479:5779:71944:5788:5743:9277:31305:16020:5634:5778:5937:5802:34399:5576:31224:45121
9986	cell surface	16 out of 129 genes, 12.4%	203 out of 6473 background genes, 3.1%	0.00028	0	XOG1:PGA26:FTR1:SOD5:KAR2:PLB4.5:SIT1:PMA1:RBT5:PGA62:FRE10:FET99:IHD1:ALS4:ALS2:PGA23	33573:9986:99020:99021:31965:16021:5886:34099:30445:30446:5737:5768:31410:1990819:5783:5788:935:9277:16020:5576:45121
31224	intrinsic component of membrane	23 out of 129 genes, 17.8%	512 out of 6473 background genes, 7.9%	0.02048	0.008	HGT1:ANT1:GAP4:FTR1:C2_06520C_A:HGT19:NGT1:PMA1:ATO1:FRE10:C4_06370C_A:MAL31:RER2:FET34:HGT10:IHD1:C7_01950W_A:OPT1:HXT5:CR_03580C_A:ISC1:HGT16:PEX13	33573:9986:324:16021:5886:1904423:1990429:5887:5811:1990415:31307:5739:5783:5794:5779:71944:31305:16020:5778:34399:31224:45121
16021	integral component of membrane	22 out of 129 genes, 17.1%	480 out of 6473 background genes, 7.4%	0.02175	0.0067	HGT1:ANT1:GAP4:FTR1:C2_06520C_A:HGT19:NGT1:PMA1:ATO1:FRE10:C4_06370C_A:MAL31:FET34:HGT10:IHD1:C7_01950W_A:OPT1:HXT5:CR_03580C_A:ISC1:HGT16:PEX13	33573:9986:324:16021:5886:1990429:5887:1990415:31307:5783:5739:5794:5779:71944:31305:16020:5778:34399:45121

## Sheet: Part 6
Supplementary Table 2 Results of the gene set enrichment analysis
Part 6– cappz1 strain MSB treated vs. cappz1 strain untreated
Upregulated gene set
Biological process
GOID	GO_term	Cluster frequency	Background frequency	Corrected P-value	False discovery rate	Gene(s) annotated to the term	Directly Annotated GOID List
44281	small molecule metabolic process	134 out of 698 genes, 19.2%	602 out of 6473 background genes, 9.3%	9.21e-15	0	LEU4:C1_00410C_A:CTN1:UGA2:SNZ1:LYS2:C1_02970W_A:GOR1:DUR1,2:TCO89:GLT1:CAT8:ADH2:UPC2:C1_08490W_A:ENO1:ERG1:PFK26:ZWF1:DAK2:URA1:C1_10280C_A:RIB3:GUP1:CYB2:OSM2:GND1:C1_13880C_A:STF2:ARO8:C2_00390C_A:C2_01660C_A:ARO3:BNA31:GPM1:THI20:BAT21:C2_04340C_A:LYS22:ARH2:PEX6:CDC19:IDP1:ILV1:ARE2:ZCF10:RNR22:LEU42:ACS1:FOX2:PXP2:CAP1:ILV2:GLX3:THI6:MET13:ALT1:C3_03680W_A:CTN3:ATF1:BAT22:C3_05760W_A:C3_06…	16237:1900409:9313:6006:32889:6890:6535:1900443:45944:9435:30447:6002:9072:48315:5998:6567:9186:6116:9097:46177:11:8615:45461:6553:1900101:6546:1900760:6807:9085:19563:6740:15810:6673:71285:1901006:6771:6725:9082:6090:19358:19660:35948:44182:6662:34975:6003:6071:31929:70785:1080:19309:19676:71470:6561:42823:48016:6351:61414:42843:18215:18065:8610:34599:1558:34517:6098:9263:1900380:18070:97237:965…
19752	carboxylic acid metabolic process	92 out of 698 genes, 13.2%	350 out of 6473 background genes, 5.4%	5.8e-14	0	LEU4:C1_00410C_A:CTN1:UGA2:SNZ1:LYS2:C1_02970W_A:GOR1:GLT1:CAT8:ADH2:C1_08490W_A:ENO1:ERG1:C1_10280C_A:CYB2:GND1:C1_13880C_A:ARO8:C2_00390C_A:C2_01660C_A:ARO3:BNA31:GPM1:BAT21:C2_04340C_A:LYS22:PEX6:CDC19:IDP1:ILV1:ZCF10:LEU42:ACS1:FOX2:PXP2:ILV2:GLX3:MET13:ALT1:C3_03680W_A:BAT22:C3_05760W_A:C3_06280W_A:LYS9:TDH3:DLD2:TPI1:PEX5:HIS5:ILV6:FBA1:C4_02040W_A:PYC2:LYS4:SCS7:ARG8:LYS1:HOM3:ARO9:GDH3:PD…	1900409:6006:32889:6890:6535:1900443:45944:30447:6002:9072:48315:6567:6116:9097:46177:11:8615:6553:6546:6807:9085:15810:6673:9082:6090:19660:35948:44182:6662:70785:1080:19676:6561:42823:6351:61414:18215:18065:34599:34517:6098:18070:70783:46835:1678:6730:6508:9405:1990355:9073:70887:19243:6631:44416:15937:19878:6888:19722:6537:9062:10430:9088:52002:42450:36187:19413:6665:6915:6085:44410:19752:6526…
43436	oxoacid metabolic process	94 out of 698 genes, 13.5%	362 out of 6473 background genes, 5.6%	6.03e-14	0	LEU4:C1_00410C_A:CTN1:UGA2:SNZ1:LYS2:C1_02970W_A:GOR1:GLT1:CAT8:ADH2:C1_08490W_A:ENO1:ERG1:C1_10280C_A:CYB2:GND1:C1_13880C_A:ARO8:C2_00390C_A:C2_01660C_A:ARO3:BNA31:GPM1:BAT21:C2_04340C_A:LYS22:PEX6:CDC19:IDP1:ILV1:ZCF10:LEU42:ACS1:FOX2:PXP2:ILV2:GLX3:MET13:ALT1:C3_03680W_A:BAT22:C3_05760W_A:C3_06280W_A:LYS9:TDH3:DLD2:TPI1:PEX5:HIS5:ILV6:FBA1:C4_02040W_A:VTC4:PYC2:LYS4:SCS7:ARG8:VPH1:LYS1:HOM3:AR…	16237:1900409:6006:32889:6890:6535:1900443:45944:30447:6002:9072:48315:6567:6116:9097:46177:11:8615:6553:6546:6807:9085:15810:6673:9082:6090:19660:35948:44182:6662:70785:1080:19676:6561:42823:48016:6351:61414:18215:18065:34599:34517:6098:18070:70783:46835:1678:6730:6508:9405:1990355:9073:70887:19243:6631:44416:15937:19878:6888:19722:6537:9062:10430:9088:52002:42450:36187:19413:6665:6915:6085:4441…
55114	oxidation-reduction process	101 out of 698 genes, 14.5%	405 out of 6473 background genes, 6.3%	7.24e-14	0	C1_00410C_A:C1_01360C_A:CTN1:UGA2:LYS2:GOR1:GLT1:CAT1:CCS1:ADH2:ERG1:ZWF1:AOX2:URA1:C1_10280C_A:MRF1:RIB3:OSM2:GND1:C1_14190C_A:SOD6:C2_01660C_A:C2_05130W_A:CDC19:OSM1:IDP1:C2_07070W_A:C2_07270W_A:RNR22:C2_08100W_A:IFR1:ACS1:DOT5:FOX2:SGA1:PXP2:COX7:CCP1:MET13:NDE1:HEM13:TSA1:TSA1B:LYS9:TDH3:C3_07330W_A:GCY1:DLD2:TPI1:PEX5:C4_02040W_A:C4_02230C_A:SOD1:SCS7:C4_05390W_A:GDH3:PDC11:GUT2:OYE32:GLR1:C…	1900409:1410:6006:6890:30447:6002:6567:9186:6882:6116:46177:11:8615:6553:6546:1900180:6807:45329:9085:10731:6740:6673:46210:6725:9082:6090:6749:19660:44182:6662:34975:6071:19676:71470:15671:42843:34599:30001:6098:9263:8202:42542:1678:6730:70301:9405:1902170:42180:9060:32516:90344:1990355:70887:44205:6631:6801:1901856:44416:19878:6888:5978:1315:6537:9062:10430:77:6979:36187:6873:6665:302:70458:691…
6082	organic acid metabolic process	94 out of 698 genes, 13.5%	363 out of 6473 background genes, 5.6%	7.35e-14	0	LEU4:C1_00410C_A:CTN1:UGA2:SNZ1:LYS2:C1_02970W_A:GOR1:GLT1:CAT8:ADH2:C1_08490W_A:ENO1:ERG1:C1_10280C_A:CYB2:GND1:C1_13880C_A:ARO8:C2_00390C_A:C2_01660C_A:ARO3:BNA31:GPM1:BAT21:C2_04340C_A:LYS22:PEX6:CDC19:IDP1:ILV1:ZCF10:LEU42:ACS1:FOX2:PXP2:ILV2:GLX3:MET13:ALT1:C3_03680W_A:BAT22:C3_05760W_A:C3_06280W_A:LYS9:TDH3:DLD2:TPI1:PEX5:HIS5:ILV6:FBA1:C4_02040W_A:VTC4:PYC2:LYS4:SCS7:ARG8:VPH1:LYS1:HOM3:AR…	16237:1900409:6006:32889:6890:6535:1900443:45944:30447:6002:9072:48315:6567:6116:9097:46177:11:8615:6553:6546:6807:9085:15810:6673:9082:6090:19660:35948:44182:6662:70785:1080:19676:6561:42823:48016:6351:61414:18215:18065:34599:34517:6098:18070:70783:46835:1678:6730:6508:9405:1990355:9073:70887:19243:6631:44416:15937:19878:6888:19722:6537:9062:10430:9088:52002:42450:36187:19413:6665:6915:6085:4441…
5975	carbohydrate metabolic process	57 out of 698 genes, 8.2%	193 out of 6473 background genes, 3.0%	4.84e-10	0	C1_01360C_A:EXG2:TPS2:TCO89:ATC1:PHO15:ENO1:PFK26:ZWF1:DAK2:GCA1:GCA2:GUP1:GND1:C1_14190C_A:GPM1:MNN42:C2_04340C_A:CDC19:TPS3:FOX2:SGA1:C3_01820W_A:TDH3:GCY1:TPI1:C3_07490W_A:FBA1:AMS1:RGT1:PYC2:MNN22:XKS1:CWH41:GUT2:ROT2:SNF1:GRE3:HEX1:PFK1:C5_05360C_A:PGA4:PGK1:DOG1:GLC3:PFK2:GSY1:CR_02800C_A:HXK2:MNN21:TPS1:PGI1:GLK1:GLK4:HSP104:SUC1:BGL22	32:9313:6006:32889:45944:30447:6002:48315:5998:71361:9272:6116:16239:46177:5982:1900180:19563:6740:15810:6046:7232:71285:6090:16052:19660:44182:34975:6003:6071:7155:31929:19309:71470:6351:42026:42843:35617:34599:1558:1904262:46354:60257:23:6098:97237:9651:46835:42542:1678:9405:32516:1904462:44416:45722:5978:70880:1319:9062:6873:5991:46115:36279:6915:30437:35308:70414:36168:46838:6000:90606:25:650…
32787	monocarboxylic acid metabolic process	46 out of 698 genes, 6.6%	144 out of 6473 background genes, 2.2%	4.96e-09	0	CTN1:UGA2:GOR1:CAT8:ENO1:ERG1:CYB2:GND1:C1_13880C_A:C2_01660C_A:BNA31:GPM1:C2_04340C_A:PEX6:CDC19:ZCF10:ACS1:FOX2:PXP2:GLX3:C3_05760W_A:TDH3:DLD2:TPI1:PEX5:FBA1:C4_02040W_A:PYC2:SCS7:PDC11:GRP2:PFK1:DES1:PGK1:PEX7:POX1:PFK2:HNM3:HXK2:FDH1:PGI1:ALK8:GLK1:ECI1:PEX13:UGA3	6006:32889:1900443:45944:30447:6002:48315:46177:6546:15810:6673:6090:19660:35948:70785:1080:6351:61414:34599:6098:70783:46835:1678:9405:70887:19243:6631:44416:15937:9062:10430:52002:36187:19413:6665:6915:6085:44410:45333:30148:15942:6000:19655:9436:6097:46015:6096:1900445:9437:51701:19740:42760:9102:1561:6084:46521:42183:51180:6559:6089:70072:7035:61688:8152:51668:7160:15976:51453:34354:15886:444…
44282	small molecule catabolic process	39 out of 698 genes, 5.6%	113 out of 6473 background genes, 1.7%	1.61e-08	0	CTN1:UGA2:GOR1:DUR1,2:CAT8:ADH2:C1_08490W_A:GUP1:GND1:ARO8:C2_01660C_A:THI20:BAT21:C2_04340C_A:CDC19:ILV1:ZCF10:FOX2:PXP2:GLX3:ALT1:C3_06280W_A:GCY1:DLD2:TPI1:C3_07490W_A:PEX5:AMS1:XKS1:ARO9:PDC11:GRE3:POX1:LAP3:FDH1:ECI1:CR_09670C_A:UGA3:FDH3	9313:1900443:45944:30447:9072:5998:6567:6116:9097:46177:6546:6807:19563:9082:6090:35948:70785:1080:19309:71470:6351:61414:42843:34599:6098:70783:6508:9405:9230:9073:19243:6631:44416:19878:9062:46115:45333:6069:15942:9058:6523:19655:9436:46677:6506:6097:6166:122:9083:6068:6148:43418:43458:6096:1900445:9437:19740:42760:1561:6084:45454:43419:46521:42183:6559:61688:9074:8152:15976:34354:1300:46294:94…
6096	glycolytic process	14 out of 698 genes, 2.0%	17 out of 6473 background genes, 0.3%	2.11e-08	0	ENO1:GND1:GPM1:C2_04340C_A:CDC19:TDH3:TPI1:FBA1:PFK1:PGK1:PFK2:HXK2:PGI1:GLK1	6006:32889:30447:6002:48315:46177:15810:6090:19660:34599:6098:46835:1678:44416:6915:6000:46015:6096:51701:70072:7035:61688:8152:7160:15976:51453:15886:44406:44409:42866:9267:32445:36170:30448:5975:61621:51156:6013:71852:55114:71216:6094:7163:51211:9051:46323:36180:30388:1302:72593
6757	ATP generation from ADP	14 out of 698 genes, 2.0%	17 out of 6473 background genes, 0.3%	2.11e-08	0	ENO1:GND1:GPM1:C2_04340C_A:CDC19:TDH3:TPI1:FBA1:PFK1:PGK1:PFK2:HXK2:PGI1:GLK1	6006:32889:30447:6002:48315:46177:15810:6090:19660:34599:6098:46835:1678:44416:6915:6000:46015:6096:51701:70072:7035:61688:8152:7160:15976:51453:15886:44406:44409:42866:9267:32445:36170:30448:5975:61621:51156:6013:71852:55114:71216:6094:7163:51211:9051:46323:36180:30388:1302:72593
6090	pyruvate metabolic process	17 out of 698 genes, 2.4%	26 out of 6473 background genes, 0.4%	6.11e-08	0	ENO1:GND1:GPM1:C2_04340C_A:CDC19:TDH3:TPI1:FBA1:PYC2:PDC11:GRP2:PFK1:PGK1:PFK2:HXK2:PGI1:GLK1	6006:32889:30447:6002:48315:46177:15810:6090:19660:34599:6098:46835:1678:44416:6915:6000:19655:46015:6096:51701:6559:70072:7035:61688:8152:7160:15976:51453:15886:44406:44409:42866:9267:32445:36170:6569:30448:5975:61621:51156:6013:71852:55114:71216:6094:7163:949:51211:9051:46323:36180:30388:1302:9438:72593
46031	ADP metabolic process	14 out of 698 genes, 2.0%	18 out of 6473 background genes, 0.3%	8.58e-08	0	ENO1:GND1:GPM1:C2_04340C_A:CDC19:TDH3:TPI1:FBA1:PFK1:PGK1:PFK2:HXK2:PGI1:GLK1	6006:32889:30447:6002:48315:46177:15810:6090:19660:34599:6098:46835:1678:44416:6915:6000:46015:6096:51701:70072:7035:61688:8152:7160:15976:51453:15886:44406:44409:42866:9267:32445:36170:30448:5975:61621:51156:6013:71852:55114:71216:6094:7163:51211:9051:46323:36180:30388:1302:72593
16052	carbohydrate catabolic process	25 out of 698 genes, 3.6%	55 out of 6473 background genes, 0.8%	9.61e-08	0	ATC1:ENO1:GCA1:GUP1:GND1:GPM1:C2_04340C_A:CDC19:SGA1:TDH3:GCY1:TPI1:FBA1:AMS1:XKS1:SNF1:GRE3:PFK1:PGK1:PFK2:CR_02800C_A:HXK2:PGI1:GLK1:SUC1	9313:6006:32889:30447:6002:48315:5998:71361:16239:46177:5982:19563:15810:7232:6090:16052:19660:44182:7155:19309:71470:6351:42843:34599:1904262:23:6098:46835:1678:9405:44416:45722:36279:6915:6000:90606:25:6506:1403:46015:6357:132:6096:51701:44262:6468:70072:7035:61688:6995:8152:1900436:7160:15976:51453:1900189:17148:15886:44406:44409:10811:5993:42866:15793:6986:9267:44011:71940:32445:5980:6109:361…
44283	small molecule biosynthetic process	67 out of 698 genes, 9.6%	280 out of 6473 background genes, 4.3%	1.68e-07	0	LEU4:C1_00410C_A:SNZ1:LYS2:C1_02970W_A:GLT1:ADH2:UPC2:ENO1:ERG1:RIB3:C1_13880C_A:ARO8:C2_00390C_A:ARO3:BNA31:GPM1:THI20:BAT21:LYS22:ARH2:CDC19:IDP1:ILV1:LEU42:CAP1:ILV2:THI6:MET13:ALT1:LYS9:C3_07490W_A:PEX5:HIS5:ILV6:FBA1:C4_02040W_A:PYC2:LYS4:SCS7:ARG8:LYS1:HOM3:ARO9:GDH3:PDC11:THR4:RIB5:ILV3:DES1:PGK1:ILV5:C7_00300W_A:ECM42:HIS7:LEU1:LYS12:HNM3:RIB1:DAP1:PDX3:LYS5:PGI1:CR_09100C_A:FDH3:TRX1:PRO1	1900409:32889:6890:6535:45944:30447:9072:48315:6567:6116:9097:11:8615:45461:6553:1900101:6546:1900760:6807:9085:15810:6673:1901006:6771:9082:6090:44182:6662:19676:6561:42823:18215:18065:8610:34599:34517:1900380:18070:6730:6879:9405:9060:43935:9230:43619:1990355:9073:70887:6631:44416:19878:6888:6537:9088:1900766:6979:42450:36252:36187:19413:6665:46115:1900835:6915:6526:30148:1900793:6069:9058:6523…
1901605	alpha-amino acid metabolic process	41 out of 698 genes, 5.9%	132 out of 6473 background genes, 2.0%	2.11e-07	0	LEU4:C1_00410C_A:SNZ1:LYS2:GLT1:ADH2:C1_08490W_A:ARO8:C2_00390C_A:BNA31:BAT21:LYS22:IDP1:ILV1:LEU42:ILV2:MET13:ALT1:C3_06280W_A:LYS9:HIS5:LYS4:ARG8:LYS1:HOM3:ARO9:GDH3:PDC11:THR4:ECM42:HIS7:LEU1:LYS12:LAP3:LYS5:FDH1:CR_05440W_A:CR_09010C_A:FDH3:TRX1:PRO1	1900409:6890:6535:30447:9072:6567:6116:9097:11:8615:6553:6546:6807:9085:9082:6090:44182:6662:19676:6561:42823:18215:18065:34599:34517:18070:6730:6508:9405:1990355:9073:19878:6888:6537:9088:42450:6665:6526:6069:15942:9058:6523:34614:19655:46677:122:9083:6068:43418:43458:9090:46185:6081:45454:6102:19346:42183:6520:6559:32180:19379:42819:9074:8152:6555:34354:1300:46294:42744:71266:6525:19477:34276:6…
6006	glucose metabolic process	14 out of 698 genes, 2.0%	19 out of 6473 background genes, 0.3%	2.93e-07	0	ENO1:ZWF1:GPM1:CDC19:TDH3:TPI1:FBA1:RGT1:PYC2:PGK1:DOG1:HXK2:PGI1:GLK1	6006:32889:45944:30447:6002:48315:6740:15810:6090:19660:44182:46835:42542:1678:44416:6915:6000:122:46015:6096:51701:8152:7160:15976:15886:44406:44409:42866:9267:32445:36170:30448:5975:45893:61621:51156:6013:71852:55114:71216:6094:7163:51211:9051:44117:46323:36180:1900429:1302:72593
6165	nucleoside diphosphate phosphorylation	14 out of 698 genes, 2.0%	19 out of 6473 background genes, 0.3%	2.93e-07	0	ENO1:GND1:GPM1:C2_04340C_A:CDC19:TDH3:TPI1:FBA1:PFK1:PGK1:PFK2:HXK2:PGI1:GLK1	6006:32889:30447:6002:48315:46177:15810:6090:19660:34599:6098:46835:1678:44416:6915:6000:46015:6096:51701:70072:7035:61688:8152:7160:15976:51453:15886:44406:44409:42866:9267:32445:36170:30448:5975:61621:51156:6013:71852:55114:71216:6094:7163:51211:9051:46323:36180:30388:1302:72593
9135	purine nucleoside diphosphate metabolic process	14 out of 698 genes, 2.0%	19 out of 6473 background genes, 0.3%	2.93e-07	0	ENO1:GND1:GPM1:C2_04340C_A:CDC19:TDH3:TPI1:FBA1:PFK1:PGK1:PFK2:HXK2:PGI1:GLK1	6006:32889:30447:6002:48315:46177:15810:6090:19660:34599:6098:46835:1678:44416:6915:6000:46015:6096:51701:70072:7035:61688:8152:7160:15976:51453:15886:44406:44409:42866:9267:32445:36170:30448:5975:61621:51156:6013:71852:55114:71216:6094:7163:51211:9051:46323:36180:30388:1302:72593
9179	purine ribonucleoside diphosphate metabolic process	14 out of 698 genes, 2.0%	19 out of 6473 background genes, 0.3%	2.93e-07	0	ENO1:GND1:GPM1:C2_04340C_A:CDC19:TDH3:TPI1:FBA1:PFK1:PGK1:PFK2:HXK2:PGI1:GLK1	6006:32889:30447:6002:48315:46177:15810:6090:19660:34599:6098:46835:1678:44416:6915:6000:46015:6096:51701:70072:7035:61688:8152:7160:15976:51453:15886:44406:44409:42866:9267:32445:36170:30448:5975:61621:51156:6013:71852:55114:71216:6094:7163:51211:9051:46323:36180:30388:1302:72593
8652	cellular amino acid biosynthetic process	35 out of 698 genes, 5.0%	107 out of 6473 background genes, 1.7%	1.03e-06	0	LEU4:SNZ1:LYS2:C1_02970W_A:GLT1:ARO8:C2_00390C_A:ARO3:BAT21:LYS22:IDP1:ILV1:LEU42:ILV2:MET13:ALT1:LYS9:HIS5:ILV6:LYS4:ARG8:LYS1:HOM3:ARO9:GDH3:THR4:ILV3:ILV5:ECM42:HIS7:LEU1:LYS12:LYS5:TRX1:PRO1	1900409:6890:6535:30447:9072:6567:9097:11:8615:6553:6807:9085:9082:44182:6662:19676:6561:42823:18215:18065:34599:34517:18070:6730:1990355:9073:19878:6888:6537:9088:42450:6526:9058:6523:34614:9083:9090:45454:6102:19346:6520:19379:42819:9074:8152:6555:52699:1300:42744:2:71266:6525:1903257:19477:97054:42144:36267:55114:9064:80058:949:10045:1900429:9094:6592:6524:9099:9086:8652:9081:105:9098:9059:356…
9132	nucleoside diphosphate metabolic process	15 out of 698 genes, 2.1%	24 out of 6473 background genes, 0.4%	2.3e-06	0	ENO1:GND1:GPM1:C2_04340C_A:CDC19:RNR22:TDH3:TPI1:FBA1:PFK1:PGK1:PFK2:HXK2:PGI1:GLK1	6006:32889:30447:6002:48315:9186:46177:15810:6090:19660:34599:6098:9263:46835:1678:44416:6915:6000:46015:6096:51701:70072:7035:61688:8152:7160:15976:51453:15886:44406:44409:42866:9267:32445:36170:30448:5975:61621:51156:6013:71852:55114:71216:6094:7163:51211:9051:46323:36180:30388:1302:72593
9185	ribonucleoside diphosphate metabolic process	14 out of 698 genes, 2.0%	21 out of 6473 background genes, 0.3%	2.38e-06	0	ENO1:GND1:GPM1:C2_04340C_A:CDC19:TDH3:TPI1:FBA1:PFK1:PGK1:PFK2:HXK2:PGI1:GLK1	6006:32889:30447:6002:48315:46177:15810:6090:19660:34599:6098:46835:1678:44416:6915:6000:46015:6096:51701:70072:7035:61688:8152:7160:15976:51453:15886:44406:44409:42866:9267:32445:36170:30448:5975:61621:51156:6013:71852:55114:71216:6094:7163:51211:9051:46323:36180:30388:1302:72593
6979	response to oxidative stress	43 out of 698 genes, 6.2%	153 out of 6473 background genes, 2.4%	2.53e-06	0	TTR1:TPS2:CAT1:CCS1:MSN4:ZWF1:GND1:STE11:C2_05060C_A:GRE2:C2_07070W_A:C2_08100W_A:PST2:DOT5:CAP1:CCP1:GLX3:CMK1:TSA1:TSA1B:POS5:GCY1:SOD1:AHP1:GST2:ATG1:GLR1:TRR1:GRE3:C6_00850W_A:CIP1:MDR1:CCZ1:RIM15:C7_03350C_A:YCP4:PST3:TPS1:ATX1:YHB1:HSP104:FDH3:TRX1	1900409:6006:6890:36278:44237:45944:30447:1402:6882:70791:71483:46177:11:45461:1900101:6546:1900760:10731:34307:6740:7232:46210:6725:1903452:6749:44182:6662:34975:71470:15671:61409:61402:6914:61403:42026:1901992:42843:30466:71466:35617:34599:61395:30001:60257:6098:1900380:71507:42542:160:34613:70301:6879:9405:61406:61405:1902170:42180:43935:43619:90344:1990355:19243:6801:1901856:43547:15903:34759…
34599	cellular response to oxidative stress	41 out of 698 genes, 5.9%	144 out of 6473 background genes, 2.2%	4.02e-06	0	TTR1:TPS2:CAT1:CCS1:MSN4:GND1:STE11:C2_05060C_A:GRE2:C2_07070W_A:PST2:DOT5:CAP1:CCP1:GLX3:CMK1:TSA1:TSA1B:POS5:GCY1:SOD1:AHP1:GST2:ATG1:GLR1:TRR1:GRE3:C6_00850W_A:CIP1:MDR1:CCZ1:RIM15:C7_03350C_A:YCP4:PST3:TPS1:ATX1:YHB1:HSP104:FDH3:TRX1	1900409:6890:36278:44237:45944:30447:1402:6882:70791:71483:46177:11:45461:1900101:6546:1900760:10731:34307:7232:46210:6725:1903452:6749:44182:6662:34975:71470:15671:61409:61402:6914:61403:42026:1901992:42843:30466:71466:35617:34599:61395:30001:60257:6098:1900380:71507:42542:160:34613:70301:6879:9405:61406:61405:1902170:42180:43935:43619:90344:1990355:19243:6801:1901856:43547:15903:34759:6888:6170…
6520	cellular amino acid metabolic process	50 out of 698 genes, 7.2%	196 out of 6473 background genes, 3.0%	4.55e-06	0	LEU4:C1_00410C_A:UGA2:SNZ1:LYS2:C1_02970W_A:GLT1:ADH2:C1_08490W_A:C1_10280C_A:ARO8:C2_00390C_A:ARO3:BNA31:BAT21:LYS22:IDP1:ILV1:LEU42:ILV2:MET13:ALT1:BAT22:C3_06280W_A:LYS9:HIS5:ILV6:LYS4:ARG8:LYS1:HOM3:ARO9:GDH3:PDC11:THR4:ILV3:ILV5:ECM42:HIS7:LEU1:LYS12:LAP3:LYS5:FDH1:CR_05440W_A:CR_09010C_A:UGA3:FDH3:TRX1:PRO1	1900409:6890:6535:30447:9072:6567:6116:9097:11:8615:6553:6546:6807:9085:9082:6090:44182:6662:1080:19676:6561:42823:18215:18065:34599:34517:18070:6730:6508:9405:1990355:9073:19878:6888:6537:9088:42450:6665:6526:6069:15942:9058:6523:34614:19655:46677:122:9083:6068:43418:43458:9090:46185:6081:19740:45454:6102:19346:42183:6520:6559:32180:19379:42819:9074:8152:6555:34354:52699:1300:46294:42744:2:9450:…
1990748	cellular detoxification	13 out of 698 genes, 1.9%	19 out of 6473 background genes, 0.3%	5.84e-06	0	TTR1:CAT1:CCS1:C2_01920C_A:TSA1:TSA1B:C5_02690W_A:TRR1:C6_00850W_A:YCF1:YHB1:CR_09670C_A:FDH3	30447:55085:6642:6546:46210:98849:6749:44182:15671:34599:30001:42542:70301:9405:1902170:90344:6801:71996:1315:77:6979:302:70458:6457:6069:98869:33194:36091:71500:6810:6878:51701:45454:46294:42744:33554:15723:9267:71218:9636:36171:36170:947:71248:42144:52565:61077:6111:55114:10038:31505:15680:1990748:19430:42262:36246:42743:33859:1302:43433:61692
46939	nucleotide phosphorylation	14 out of 698 genes, 2.0%	22 out of 6473 background genes, 0.3%	5.91e-06	0	ENO1:GND1:GPM1:C2_04340C_A:CDC19:TDH3:TPI1:FBA1:PFK1:PGK1:PFK2:HXK2:PGI1:GLK1	6006:32889:30447:6002:48315:46177:15810:6090:19660:34599:6098:46835:1678:44416:6915:6000:46015:6096:51701:70072:7035:61688:8152:7160:15976:51453:15886:44406:44409:42866:9267:32445:36170:30448:5975:61621:51156:6013:71852:55114:71216:6094:7163:51211:9051:46323:36180:30388:1302:72593
16054	organic acid catabolic process	27 out of 698 genes, 3.9%	76 out of 6473 background genes, 1.2%	1.29e-05	0	CTN1:UGA2:GOR1:CAT8:ADH2:C1_08490W_A:GND1:ARO8:C2_01660C_A:BAT21:C2_04340C_A:ILV1:ZCF10:FOX2:PXP2:ALT1:C3_06280W_A:DLD2:PEX5:ARO9:PDC11:POX1:LAP3:FDH1:ECI1:UGA3:FDH3	1900443:45944:30447:9072:6567:6116:9097:46177:6546:9082:6090:35948:70785:1080:6351:61414:34599:6098:70783:6508:9405:9073:6631:19878:9062:45333:6069:15942:9058:6523:19655:9436:46677:6097:122:9083:6068:43418:43458:1900445:9437:19740:42760:1561:6084:45454:46521:42183:6559:61688:9074:8152:15976:34354:1300:46294:9450:19631:6355:35959:19477:6569:6625:947:5975:6635:55114:16558:1903457:45733:949:9051:441…
46395	carboxylic acid catabolic process	27 out of 698 genes, 3.9%	76 out of 6473 background genes, 1.2%	1.29e-05	0	CTN1:UGA2:GOR1:CAT8:ADH2:C1_08490W_A:GND1:ARO8:C2_01660C_A:BAT21:C2_04340C_A:ILV1:ZCF10:FOX2:PXP2:ALT1:C3_06280W_A:DLD2:PEX5:ARO9:PDC11:POX1:LAP3:FDH1:ECI1:UGA3:FDH3	1900443:45944:30447:9072:6567:6116:9097:46177:6546:9082:6090:35948:70785:1080:6351:61414:34599:6098:70783:6508:9405:9073:6631:19878:9062:45333:6069:15942:9058:6523:19655:9436:46677:6097:122:9083:6068:43418:43458:1900445:9437:19740:42760:1561:6084:45454:46521:42183:6559:61688:9074:8152:15976:34354:1300:46294:9450:19631:6355:35959:19477:6569:6625:947:5975:6635:55114:16558:1903457:45733:949:9051:441…
5996	monosaccharide metabolic process	19 out of 698 genes, 2.7%	41 out of 6473 background genes, 0.6%	1.35e-05	0	ENO1:PFK26:ZWF1:GPM1:CDC19:TDH3:GCY1:TPI1:FBA1:AMS1:RGT1:PYC2:XKS1:GRE3:PGK1:DOG1:HXK2:PGI1:GLK1	9313:6006:32889:45944:30447:6002:48315:5998:6740:15810:6090:19660:44182:6003:19309:71470:42843:34599:46835:42542:1678:44416:6915:6000:122:46015:6096:51701:8152:7160:15976:15886:44406:44409:42866:9267:32445:36170:30448:5975:45893:61621:51156:6013:71852:55114:71216:6094:7163:51211:9051:19568:44117:46323:36180:1900429:19388:1302:72593:35690
19318	hexose metabolic process	17 out of 698 genes, 2.4%	35 out of 6473 background genes, 0.5%	3.46e-05	0	ENO1:PFK26:ZWF1:GPM1:CDC19:TDH3:TPI1:FBA1:AMS1:RGT1:PYC2:GRE3:PGK1:DOG1:HXK2:PGI1:GLK1	9313:6006:32889:45944:30447:6002:48315:6740:15810:6090:19660:44182:6003:19309:71470:42843:34599:46835:42542:1678:44416:6915:6000:122:46015:6096:51701:8152:7160:15976:15886:44406:44409:42866:9267:32445:36170:30448:5975:45893:61621:51156:6013:71852:55114:71216:6094:7163:51211:9051:19568:44117:46323:36180:1900429:19388:1302:72593
1901607	alpha-amino acid biosynthetic process	30 out of 698 genes, 4.3%	95 out of 6473 background genes, 1.5%	4.42e-05	0	LEU4:SNZ1:LYS2:GLT1:ARO8:C2_00390C_A:BAT21:LYS22:IDP1:ILV1:LEU42:ILV2:MET13:ALT1:LYS9:HIS5:LYS4:ARG8:LYS1:HOM3:ARO9:GDH3:THR4:ECM42:HIS7:LEU1:LYS12:LYS5:TRX1:PRO1	1900409:6890:6535:30447:9072:6567:9097:11:8615:6553:6807:9085:9082:44182:6662:19676:6561:42823:18215:18065:34599:34517:18070:6730:1990355:9073:19878:6888:6537:9088:42450:6526:9058:6523:34614:9083:9090:45454:6102:19346:6520:19379:42819:9074:8152:6555:1300:42744:71266:6525:19477:97054:42144:36267:55114:9064:80058:949:10045:1900429:9094:6592:6524:9099:9086:8652:9081:105:9098:9059:35690:6571
9056	catabolic process	112 out of 698 genes, 16.0%	637 out of 6473 background genes, 9.8%	5.48e-05	0	C1_00410C_A:C1_00430W_A:C1_00860W_A:CTN1:UGA2:C1_01890C_A:C1_02040C_A:RAD16:GOR1:RPN4:C1_04560W_A:DUR1,2:C1_06390W_A:CAT1:ATC1:CAT8:ADH2:C1_08490W_A:ENO1:LIP1:GCA1:GUP1:GND1:DOA4:ARO8:C2_01660C_A:GPM1:THI20:C2_03910C_A:BAT21:C2_04340C_A:CDC19:ILV1:PRB1:ZCF10:RSP5:C2_09620W_A:FOX2:C3_00940W_A:SGA1:PXP2:GLX3:ALT1:PKC1:C3_04970C_A:TSA1:C3_06280W_A:TSA1B:TDH3:GCY1:DLD2:TPI1:C3_07490W_A:PEX5:C4_00260W…	16237:43162:1900409:9313:6006:32889:6890:45324:1900443:45944:71071:30447:6002:9072:48315:5998:6567:6501:1900039:71361:9272:6333:6116:70417:9097:16239:44090:6642:46177:11:16577:7039:5982:7114:6546:30968:34497:6807:19563:15810:6046:7232:46210:32147:71285:10994:9082:6090:31398:16052:34638:19660:35948:71211:44182:6662:7155:10995:70785:1080:19309:6511:71470:6561:34629:15671:48016:1904380:6351:6914:614…
97237	cellular response to toxic substance	17 out of 698 genes, 2.4%	36 out of 6473 background genes, 0.6%	5.91e-05	0	TTR1:CAT1:ATC1:CCS1:MSN4:DAK2:C2_01920C_A:TSA1:TSA1B:ADR1:C5_02690W_A:TRR1:C6_00850W_A:YCF1:YHB1:CR_09670C_A:FDH3	36278:45944:30447:55085:71361:71483:6325:6642:6546:46210:98849:6749:44182:6071:15671:61409:61402:61403:34599:61424:61395:30001:31936:97237:42542:70301:9405:61406:61405:1902170:90344:6801:71996:1315:77:6979:61425:61434:302:70458:6457:6069:98869:33194:36091:71500:6810:6878:61401:51701:61408:71406:45454:6338:1324:61422:46294:42744:33554:61411:15723:6355:5993:9267:71218:97235:9636:36171:36170:947:614…
6553	lysine metabolic process	9 out of 698 genes, 1.3%	11 out of 6473 background genes, 0.2%	0.00014	0	LYS2:ARO8:LYS22:LYS9:LYS4:LYS1:ARO9:LYS12:LYS5	9072:6553:9085:18215:18065:18070:9073:19878:9074:19477:55114:949:9094:9059:6571
9085	lysine biosynthetic process	9 out of 698 genes, 1.3%	11 out of 6473 background genes, 0.2%	0.00014	0	LYS2:ARO8:LYS22:LYS9:LYS4:LYS1:ARO9:LYS12:LYS5	9072:6553:9085:18215:18065:18070:9073:19878:9074:19477:55114:949:9094:9059:6571
16053	organic acid biosynthetic process	43 out of 698 genes, 6.2%	174 out of 6473 background genes, 2.7%	0.00016	0	LEU4:SNZ1:LYS2:C1_02970W_A:GLT1:C1_13880C_A:ARO8:C2_00390C_A:ARO3:BNA31:BAT21:LYS22:CDC19:IDP1:ILV1:LEU42:ILV2:MET13:ALT1:LYS9:PEX5:HIS5:ILV6:C4_02040W_A:LYS4:SCS7:ARG8:LYS1:HOM3:ARO9:GDH3:THR4:ILV3:DES1:ILV5:ECM42:HIS7:LEU1:LYS12:HNM3:LYS5:TRX1:PRO1	1900409:6890:6535:30447:9072:6567:9097:11:8615:6553:6807:9085:6673:9082:6090:44182:6662:19676:6561:42823:18215:18065:34599:34517:18070:6730:1990355:9073:6631:44416:19878:6888:6537:9088:42450:19413:6665:6526:30148:9058:6523:34614:9083:9090:6096:9102:45454:6102:19346:51180:6520:19379:42819:9074:8152:6555:34354:52699:1300:42744:2:6355:71266:6525:1903257:42866:9267:46208:19477:6675:34276:36170:6625:9…
46394	carboxylic acid biosynthetic process	43 out of 698 genes, 6.2%	174 out of 6473 background genes, 2.7%	0.00016	0	LEU4:SNZ1:LYS2:C1_02970W_A:GLT1:C1_13880C_A:ARO8:C2_00390C_A:ARO3:BNA31:BAT21:LYS22:CDC19:IDP1:ILV1:LEU42:ILV2:MET13:ALT1:LYS9:PEX5:HIS5:ILV6:C4_02040W_A:LYS4:SCS7:ARG8:LYS1:HOM3:ARO9:GDH3:THR4:ILV3:DES1:ILV5:ECM42:HIS7:LEU1:LYS12:HNM3:LYS5:TRX1:PRO1	1900409:6890:6535:30447:9072:6567:9097:11:8615:6553:6807:9085:6673:9082:6090:44182:6662:19676:6561:42823:18215:18065:34599:34517:18070:6730:1990355:9073:6631:44416:19878:6888:6537:9088:42450:19413:6665:6526:30148:9058:6523:34614:9083:9090:6096:9102:45454:6102:19346:51180:6520:19379:42819:9074:8152:6555:34354:52699:1300:42744:2:6355:71266:6525:1903257:42866:9267:46208:19477:6675:34276:36170:6625:9…
17001	antibiotic catabolic process	11 out of 698 genes, 1.6%	17 out of 6473 background genes, 0.3%	0.00023	0	CTN1:CAT1:CAT8:ADH2:TSA1:TSA1B:C6_00850W_A:FDH1:CR_09670C_A:FDH3:TRX1	1900409:6890:1900443:45944:30447:6567:6116:11:6546:35948:44182:6662:70785:6351:61414:34599:70783:42542:70301:9405:90344:1990355:6888:1315:77:6979:302:45333:6457:6069:15942:33194:36091:34614:6068:43458:9437:51701:6084:45454:42183:19379:15976:46294:42744:33554:9267:35959:36171:36170:947:42144:61077:6111:55114:45733:80058:31505:36180:1900429:42262:42743:33859:1302:43433:61692
19878	lysine biosynthetic process via aminoadipic acid	8 out of 698 genes, 1.1%	9 out of 6473 background genes, 0.1%	0.00023	0	LYS2:ARO8:LYS22:LYS9:LYS4:LYS1:ARO9:LYS5	9072:9085:18215:18065:18070:9073:19878:9074:19477:55114:949:9094:9059:6571
45454	cell redox homeostasis	15 out of 698 genes, 2.1%	31 out of 6473 background genes, 0.5%	0.00025	0	TTR1:C2_09620W_A:DOT5:TSA1:TSA1B:SOD1:AHP1:OYE32:GLR1:TRR1:C6_00850W_A:YCF1:OPT3:FDH3:TRX1	1900409:6890:30447:55085:6882:11:51515:6546:10731:98849:6749:44182:6662:34599:42542:70301:9405:90344:1990355:35672:6801:1901856:30433:71996:6888:77:6979:6457:6069:98869:33194:61091:36091:34614:6810:6878:1320:51701:19740:6621:45454:19379:46294:42744:33554:15723:6857:36171:36170:51091:947:42144:36245:61077:6111:55114:10038:50821:80058:31505:19430:1900429:42262:36246:33859:1302:43433:61692:44088
1901575	organic substance catabolic process	96 out of 698 genes, 13.8%	541 out of 6473 background genes, 8.4%	0.00039	0	C1_00410C_A:CTN1:UGA2:C1_01890C_A:C1_02040C_A:RAD16:GOR1:RPN4:C1_04560W_A:DUR1,2:C1_06390W_A:ATC1:CAT8:ADH2:C1_08490W_A:ENO1:LIP1:GCA1:GUP1:GND1:DOA4:ARO8:C2_01660C_A:GPM1:THI20:C2_03910C_A:BAT21:C2_04340C_A:CDC19:ILV1:PRB1:ZCF10:RSP5:C2_09620W_A:FOX2:C3_00940W_A:SGA1:PXP2:GLX3:ALT1:C3_04970C_A:C3_06280W_A:TDH3:GCY1:DLD2:TPI1:C3_07490W_A:PEX5:C4_00260W_A:C4_00500W_A:C4_00950C_A:FBA1:C4_02040W_A:C…	43162:9313:6006:32889:45324:1900443:45944:71071:30447:6002:9072:48315:5998:6567:1900039:71361:6333:6116:9097:16239:6642:46177:16577:7039:5982:7114:6546:30968:6807:19563:15810:6046:7232:71285:10994:9082:6090:31398:16052:34638:19660:35948:44182:7155:10995:70785:1080:19309:6511:71470:34629:1904380:6914:6351:61414:42843:45721:1905530:34599:1904262:34517:61395:715:36508:23:6098:10793:70783:46835:1678:…
72593	reactive oxygen species metabolic process	12 out of 698 genes, 1.7%	21 out of 6473 background genes, 0.3%	0.00043	0	TTR1:CAT1:CCS1:SOD6:TSA1:TSA1B:TDH3:SOD1:TRR1:C6_00850W_A:YHB1:TRX1	1900409:6006:6890:30447:6882:11:46210:6749:44182:6662:15671:34599:30001:42542:70301:9405:1902170:90344:1990355:6801:1901856:44416:6888:1315:77:6979:302:70458:6915:6457:98869:33194:36091:34614:71500:6878:6096:1320:51701:45454:19379:7160:15886:44406:42744:33554:9267:71218:9636:36171:36170:51091:71248:42144:52565:61077:6111:55114:50821:80058:31505:15680:19430:1900429:42262:42743:1302:43433:61692:725…
9082	branched-chain amino acid biosynthetic process	9 out of 698 genes, 1.3%	12 out of 6473 background genes, 0.2%	0.0005	0	LEU4:BAT21:ILV1:LEU42:ILV2:ILV6:ILV3:ILV5:LEU1	6567:9097:9082:9083:8152:2:55114:9099:8652:9081:9098:35690
16999	antibiotic metabolic process	15 out of 698 genes, 2.1%	34 out of 6473 background genes, 0.5%	0.00115	0	CTN1:CAT1:CAT8:ADH2:C1_13880C_A:ACS1:TSA1:TSA1B:PEX5:C6_00850W_A:FDH1:ALK8:CR_09670C_A:FDH3:TRX1	1900409:6890:1900443:45944:30447:6567:6116:11:6546:35948:44182:6662:70785:6351:61414:34599:70783:42542:70301:9405:90344:1990355:6631:6888:1315:10430:77:6979:19413:302:6085:45333:6457:6069:15942:33194:36091:34614:6068:43458:9437:51701:6084:45454:42183:19379:15976:46294:42744:33554:48252:6355:9267:35959:16573:36171:19427:36170:6625:947:6635:42144:61077:6111:55114:16558:45733:80058:31505:19654:16560…
42737	drug catabolic process	14 out of 698 genes, 2.0%	30 out of 6473 background genes, 0.5%	0.00117	0	CAT1:ADH2:ARO8:THI20:TSA1:TSA1B:C4_02040W_A:ARO9:PDC11:C6_00850W_A:FDH1:YHB1:FDH3:TRX1	1900409:6890:30447:9072:6567:6116:11:6546:46210:6090:44182:6662:15671:34599:42542:70301:9405:1902170:9230:90344:1990355:9073:19878:6888:1315:77:6979:302:70458:6457:6069:15942:33194:36091:34614:19655:71500:6068:43458:51701:45454:42183:6559:19379:9074:46294:42744:33554:6355:9267:46208:71218:19477:9636:9228:36171:36170:6569:947:42144:52565:61077:6111:55114:80058:31505:949:1900429:9094:42262:42743:33…
19725	cellular homeostasis	45 out of 698 genes, 6.4%	201 out of 6473 background genes, 3.1%	0.00174	0	TTR1:CCS1:CRP1:C1_09780C_A:VPH2:DOA4:C1_14190C_A:C2_01170C_A:DFG16:ARH2:DBF2:RSP5:C2_09590C_A:C2_09620W_A:DOT5:HRK1:IRO1:C3_03760W_A:C3_04360W_A:TSA1:TSA1B:PGA10:C4_00500W_A:SOD1:AHP1:VPH1:C4_06770W_A:OYE32:GLR1:TRR1:PFK1:C6_00850W_A:VPS51:SNQ2:PFK2:YCF1:OPT3:GEF2:HXK2:CRG1:ATX1:GLK1:GLK4:FDH3:TRX1	43162:1900409:6006:6890:45944:30447:6002:55085:19432:32463:6333:6882:16239:11:15691:51515:6546:1900180:10731:90156:71285:10994:98849:2000250:6749:19660:44182:6662:10995:6511:280:6812:1905530:34599:34517:30001:62111:6875:10793:36177:46835:42542:1678:70301:6879:9405:19220:32516:90344:1990355:1902854:35672:32436:6801:1901856:30433:71996:6672:6464:34759:6888:44878:10796:77:6979:6873:34067:35308:910:7…
1901615	organic hydroxy compound metabolic process	30 out of 698 genes, 4.3%	111 out of 6473 background genes, 1.7%	0.00198	0	SNZ1:PDR16:TCO89:ADH2:UPC2:ERG1:DAK2:GUP1:CYB2:ARO8:IDP1:ARE2:ZCF10:C2_07440C_A:C2_08170W_A:CAP1:GLX3:CTN3:ATF1:DLD2:C4_02230C_A:ARO9:PDC11:GUT2:DES1:UGT51C1:DAP1:PDX3:CR_09100C_A:FDH3	6535:45944:30447:9072:16126:6567:6116:8615:15914:45461:1900101:6546:1900760:19563:71285:43942:6090:6071:31929:42823:6351:8610:34599:1558:1900380:97237:9651:9405:34210:43935:43619:9073:70887:19243:6631:19878:6537:1900766:52002:6979:36252:36187:6665:1900835:6915:44410:30148:32120:1900793:6069:36091:42821:19655:6506:6068:9408:71276:30436:6357:43458:16125:71456:36178:9437:1900445:61408:6084:45454:610…
9081	branched-chain amino acid metabolic process	10 out of 698 genes, 1.4%	17 out of 6473 background genes, 0.3%	0.00318	0	LEU4:BAT21:ILV1:LEU42:ILV2:BAT22:ILV6:ILV3:ILV5:LEU1	6567:9097:9082:9083:8152:2:55114:9099:8652:9081:9098:35690
9066	aspartate family amino acid metabolic process	17 out of 698 genes, 2.4%	46 out of 6473 background genes, 0.7%	0.00423	0	LYS2:ADH2:ARO8:C2_00390C_A:LYS22:ILV1:MET13:C3_06280W_A:LYS9:LYS4:LYS1:HOM3:ARO9:THR4:LYS12:LYS5:TRX1	1900409:6890:30447:9072:6567:6116:9097:11:6553:9085:44182:6662:18215:18065:34599:18070:6730:1990355:9073:19878:6888:9088:34614:6068:43458:9090:45454:19346:19379:9074:8152:6555:42744:71266:19477:947:42144:55114:80058:949:1900429:9094:9099:9086:8652:6565:9059:6571
302	response to reactive oxygen species	15 out of 698 genes, 2.1%	37 out of 6473 background genes, 0.6%	0.00427	0	TTR1:CAT1:CCS1:MSN4:ZWF1:C2_08100W_A:CAP1:CCP1:TSA1:TSA1B:SOD1:TRR1:C6_00850W_A:HSP104:TRX1	1900409:6006:6890:36278:45944:30447:6882:71483:11:45461:1900101:1900760:6740:6749:44182:6662:34975:61409:61402:61403:42026:35617:34599:61395:30001:1900380:42542:70301:9405:61406:61405:43935:43619:90344:1990355:6801:1901856:6888:1315:1319:77:1900766:6979:36252:1900835:61434:302:6915:70414:6457:1900793:98869:33194:36091:34614:43065:9408:71276:30436:6357:6878:61401:19538:1320:51701:61408:71406:45454…
44262	cellular carbohydrate metabolic process	29 out of 698 genes, 4.2%	110 out of 6473 background genes, 1.7%	0.00516	0	C1_01360C_A:TPS2:TCO89:ATC1:PHO15:DAK2:GCA1:GUP1:GND1:C1_14190C_A:MNN42:C2_04340C_A:TPS3:FOX2:SGA1:MNN22:CWH41:GUT2:ROT2:SNF1:PGA4:GLC3:GSY1:CR_02800C_A:HXK2:MNN21:TPS1:HSP104:SUC1	32:6006:30447:6002:71361:9272:6116:16239:46177:5982:1900180:19563:7232:71285:16052:44182:34975:6071:7155:31929:71470:6351:42026:35617:34599:1558:1904262:46354:60257:23:6098:97237:9651:46835:1678:9405:32516:45722:5978:70880:1319:9062:6873:5991:36279:30437:35308:70414:36168:46838:6000:90606:25:6506:6097:5992:1403:46015:1900118:6357:132:6096:19538:44262:42760:6486:6468:61688:34605:6995:90441:1900436…
72329	monocarboxylic acid catabolic process	16 out of 698 genes, 2.3%	42 out of 6473 background genes, 0.6%	0.00526	0	CTN1:UGA2:GOR1:CAT8:GND1:C2_01660C_A:C2_04340C_A:ZCF10:FOX2:PXP2:DLD2:PEX5:POX1:FDH1:ECI1:UGA3	1900443:45944:30447:46177:6546:35948:70785:1080:6351:61414:34599:6098:70783:9405:6631:9062:45333:15942:9436:6097:1900445:9437:19740:42760:1561:6084:46521:42183:61688:8152:15976:9450:19631:6355:35959:6625:5975:6635:55114:16558:1903457:45733:9051:44117:16560:36180:42318
98869	cellular oxidant detoxification	7 out of 698 genes, 1.0%	9 out of 6473 background genes, 0.1%	0.00811	0	TTR1:CAT1:CCS1:TSA1:TSA1B:TRR1:C6_00850W_A	30447:6749:34599:30001:42542:70301:9405:90344:6801:1315:77:6979:302:6457:98869:33194:36091:6878:51701:45454:42744:33554:9267:36171:36170:71248:61077:6111:55114:31505:15680:19430:42262:42743:1302:43433:61692
9636	response to toxic substance	25 out of 698 genes, 3.6%	90 out of 6473 background genes, 1.4%	0.00902	0	TTR1:C1_01750W_A:CAT1:ATC1:CCS1:CDR4:MSN4:ZWF1:DAK2:C2_01920C_A:C2_08170W_A:CDR11:TSA1:TSA1B:ADR1:C5_02690W_A:TRR1:C5_03940C_A:C6_00850W_A:C6_01870C_A:MDR1:YCF1:YHB1:CR_09670C_A:FDH3	6006:36278:45944:30447:55085:71361:71483:6325:6642:6546:6740:46210:98849:6749:44182:6071:15671:61409:61402:61403:34599:61424:61395:30001:31936:97237:42542:70301:9405:61406:34210:61405:1902170:90344:6801:71996:15903:1315:77:6979:61425:61434:302:70458:6457:6069:98869:33194:36091:71500:6810:6878:16125:61401:51701:61408:71406:45454:6338:1324:61422:46294:42744:33554:61411:15723:6355:5993:9267:71218:97…
51186	cofactor metabolic process	38 out of 698 genes, 5.4%	169 out of 6473 background genes, 2.6%	0.01093	0	C1_00410C_A:TTR1:CTN1:SNZ1:CAT1:C1_08490W_A:OSM2:BNA31:HYU1:ARH2:C2_09670C_A:ACS1:CAP1:GTT12:CTN3:HEM13:C3_05760W_A:TSA1:TSA1B:POS5:C4_02040W_A:ECM38:GLR1:COX15:C6_00850W_A:C6_02030C_A:C6_02980C_A:ATM1:C7_00300W_A:YCF1:DUG3:CR_00350W_A:CAB3:HNM3:PDX3:CR_05440W_A:CR_09100C_A:TRX1	1900409:6890:6535:45944:9435:30447:55085:11:8615:45461:1900101:1900760:10731:1901006:98849:16226:6749:19358:44182:6662:34975:42823:34599:1900380:42542:70301:6879:9405:43935:43619:90344:1990355:71996:15937:6888:1315:77:1900766:6979:36252:6665:1900835:302:6915:6085:45333:6457:1900793:48250:33194:36091:34614:42821:6810:9408:71276:30436:6357:46185:36178:9437:51701:6081:6784:61408:9102:6084:45454:5118…
42221	response to chemical	121 out of 698 genes, 17.3%	778 out of 6473 background genes, 12.0%	0.01337	0	LEU4:TTR1:C1_01750W_A:TPS2:C1_03450C_A:PDR16:RPN4:TCO89:CAT1:ATC1:CCS1:CDR4:CAT8:UPC2:C1_08540C_A:ERG1:MSN4:ZWF1:DAK2:AVT4:VPH2:STP2:GND1:DOA4:C1_14190C_A:IML2:C1_14250C_A:C2_00360C_A:C2_00770W_A:HGT7:HNM1:C2_01450C_A:C2_01920C_A:STE11:C2_03910C_A:SSY1:STE4:C2_05060C_A:GRE2:C2_07070W_A:C2_07280W_A:C2_08100W_A:C2_08170W_A:MFA1:RSP5:PST2:STB3:C2_09620W_A:DOT5:C3_00940W_A:C3_01280W_A:CAP1:CCP1:GLX3:…	43162:71311:1900409:6006:6890:36278:45324:44237:1900443:45944:30447:16310:55085:48315:16126:43409:71361:9272:6333:1402:6882:70417:70791:16239:71483:6325:6642:46942:46177:11:15914:45461:90515:1900101:6546:16320:1900180:30968:1900760:10731:34307:6740:32366:7232:46210:1900378:71285:10994:71444:6725:98849:1903452:7029:43942:31398:6749:35948:44182:1990539:6662:34975:1903940:6071:7155:10995:70785:31929…
6081	cellular aldehyde metabolic process	9 out of 698 genes, 1.3%	16 out of 6473 background genes, 0.2%	0.01771	0	C1_00410C_A:SNZ1:GOR1:FOX2:GLX3:GRP2:CR_09100C_A:CR_09670C_A:FDH3	6535:8615:6546:6090:42823:34599:9405:19243:9062:6665:6069:42821:9436:6097:46185:6081:42760:45454:32180:42819:46294:947:6635:55114:6744:33859:31669:9438
42744	hydrogen peroxide catabolic process	5 out of 698 genes, 0.7%	5 out of 6473 background genes, 0.1%	0.02393	0.0007	CAT1:TSA1:TSA1B:C6_00850W_A:TRX1	1900409:6890:30447:11:44182:6662:34599:42542:70301:9405:90344:1990355:6888:1315:77:6979:302:6457:33194:36091:34614:51701:45454:19379:42744:33554:9267:36171:36170:42144:61077:6111:55114:80058:31505:1900429:42262:42743:1302:43433:61692
1901700	response to oxygen-containing compound	25 out of 698 genes, 3.6%	95 out of 6473 background genes, 1.5%	0.02553	0.0007	TTR1:CAT1:ATC1:CCS1:C1_08540C_A:MSN4:ZWF1:C2_03910C_A:SSY1:C2_08100W_A:CAP1:CCP1:TSA1:TSA1B:SOD1:ADR1:GLR1:TRR1:C6_00850W_A:TPS1:HSP104:CR_08650C_A:CR_09670C_A:FDH3:TRX1	71311:1900409:6006:6890:36278:45944:30447:71361:6882:71483:6325:11:45461:1900101:6546:1900760:10731:6740:6749:44182:6662:34975:1903940:6511:61409:61402:1904380:61403:42026:35617:34599:61424:61395:30001:36508:31936:1900380:42542:70301:9405:61406:90155:61405:43935:43619:90344:1990355:6801:1901856:6650:6888:1315:1319:46777:42149:77:1900766:6979:36252:18105:61425:1900835:61434:302:6915:60237:30437:36…
98754	detoxification	19 out of 698 genes, 2.7%	63 out of 6473 background genes, 1.0%	0.03394	0.001	TTR1:C1_01750W_A:CAT1:CCS1:CDR4:C2_01920C_A:CDR11:TSA1:TSA1B:C5_02690W_A:TRR1:C5_03940C_A:C6_00850W_A:C6_01870C_A:MDR1:YCF1:YHB1:CR_09670C_A:FDH3	30447:55085:6642:6546:46210:98849:6749:44182:15671:34599:30001:42542:70301:9405:1902170:90344:6801:71996:15903:1315:77:6979:302:70458:6457:6069:98869:33194:36091:71500:6810:6878:51701:45454:46294:42744:33554:15723:9267:71218:9636:1990961:36171:36170:947:71248:42144:52565:61077:6111:55114:10038:31505:15680:1990748:19430:42262:36246:42743:33859:1302:43433:61692:42493:35690
6091	generation of precursor metabolites and energy	32 out of 698 genes, 4.6%	139 out of 6473 background genes, 2.1%	0.03538	0.001	C1_01360C_A:CTN1:ADH2:ENO1:ZWF1:AOX2:MRF1:RIB3:GND1:C1_14190C_A:GPM1:C2_04340C_A:CDC19:ACS1:SGA1:COX7:NDE1:TDH3:TPI1:FBA1:PDC11:PFK1:COX15:PGK1:C6_02560W_A:GLC3:PFK2:GSY1:HXK2:PGI1:GLK1:FDH3	6006:32889:30447:6002:48315:6567:6116:46177:6546:1900180:6740:15810:6090:19660:34599:6098:46835:42542:1678:9405:9060:32516:44416:5978:6873:6915:6085:35308:45333:6069:6000:19655:46015:6068:43458:6096:9437:51701:6784:9231:6084:45454:6123:6559:70072:7035:61688:8152:7160:15976:51453:1300:15886:46294:44406:7094:5977:32515:44409:6355:42866:9267:16573:32445:22904:5980:19427:36170:6569:947:30448:5975:616…
16051	carbohydrate biosynthetic process	18 out of 698 genes, 2.6%	59 out of 6473 background genes, 0.9%	0.047	0.001	C1_01360C_A:TPS2:ENO1:GPM1:MNN42:TPS3:FBA1:PYC2:MNN22:CWH41:ROT2:PGA4:PGK1:GLC3:GSY1:MNN21:TPS1:PGI1	32:32889:30447:48315:9272:15810:6090:44182:71470:34599:46354:60257:9405:44416:5978:70880:5991:30437:36168:5992:1900118:6096:51701:44262:6486:34605:8152:90441:15976:70413:33554:44409:9311:71970:52559:9267:36170:30448:5975:6491:34412:71852:51278:71216:6094:7163:6487:31505:31321:51211:36180:35268:71465:35690
9067	aspartate family amino acid biosynthetic process	14 out of 698 genes, 2.0%	39 out of 6473 background genes, 0.6%	0.04817	0.0009	LYS2:ARO8:C2_00390C_A:LYS22:MET13:LYS9:LYS4:LYS1:HOM3:ARO9:THR4:LYS12:LYS5:TRX1	1900409:6890:30447:9072:11:6553:9085:44182:6662:18215:18065:34599:18070:6730:1990355:9073:19878:6888:9088:34614:9090:45454:19346:19379:9074:8152:6555:42744:71266:19477:42144:55114:80058:949:1900429:9094:9086:8652:9059:6571
Molecular function
GOID	GO_term	Cluster frequency	Background frequency	Corrected P-value	False discovery rate	Gene(s) annotated to the term	Directly Annotated GOID List
16491	oxidoreductase activity	110 out of 698 genes, 15.8%	429 out of 6473 background genes, 6.6%	5.64e-17	0	C1_00410C_A:TTR1:UGA2:LYS2:GOR1:CSH1:IFD6:C1_04460C_A:LPG20:GLT1:CAT1:ADH2:ERG1:ZWF1:AOX2:URA1:C1_09780C_A:C1_10280C_A:MRF1:CYB2:OSM2:GND1:SOD6:C2_01660C_A:YIM1:ARH2:C2_05060C_A:C2_05130W_A:OSM1:IDP1:GRE2:C2_07070W_A:C2_07270W_A:RNR22:C2_08100W_A:PST2:C2_09620W_A:IFR1:DOT5:FOX2:PXP2:COX7:CCP1:SLD1:MET13:NDE1:GTT12:HEM13:TSA1:TSA1B:LYS9:TDH3:C3_07330W_A:GCY1:DLD2:C4_00260W_A:C4_02040W_A:C4_02230C_…	3954:16638:16652:42284:18456:5506:4090:50625:4506:16491:16614:16747:3690:16620:33833:8379:19153:4364:4129:3997:4489:32542:287:4033:46872:4096:50840:15930:18576:1990042:18484:3960:4109:8199:5496:51268:4362:4300:51903:4733:46592:4175:16639:9013:16616:47964:50661:47019:16712:3756:43236:34648:31177:3677:3700:8785:4602:3824:104:8336:8144:19825:4754:16209:16651:32454:4458:16705:4746:10181:51082:4158:19…
48037	cofactor binding	68 out of 698 genes, 9.7%	233 out of 6473 background genes, 3.6%	1.01e-12	0	C1_02740C_A:LYS2:C1_02970W_A:GOR1:C1_03750W_A:GLT1:CAT1:C1_08490W_A:ERG1:ZWF1:C1_10280C_A:CYB2:OSM2:GND1:ARO8:C2_00390C_A:BNA32:BNA31:IDP1:C2_06710W_A:GRE2:C2_07270W_A:PST2:C2_09670C_A:PXP2:ILV2:CCP1:SLD1:NDE1:ALT1:C3_03680W_A:TDH3:DLD2:PGA10:HIS5:PDC12:PYC2:LYS4:SCS7:ARG8:C4_05390W_A:ARO9:PDC11:OYE32:GLR1:GRP2:COX15:ILV5:EBP1:OYE2:OYE23:POX1:C7_03200C_A:CR_00130C_A:LEU1:OYE22:LYS12:DAP1:PDX3:DIT…	8483:3954:16638:5506:16212:50625:4506:16491:4409:16614:3690:16620:1990412:3997:287:4096:4736:50840:15930:36137:16831:3984:5496:5524:8793:4362:4733:16639:47433:47964:16616:50661:16712:43236:31177:3677:47804:3700:4021:16887:3992:104:3824:8144:19825:30429:3861:30976:16651:47536:4075:4061:4458:8117:16705:10181:8863:16156:42562:70403:51536:9374:4460:3955:51287:16653:8762:18685:4043:1990411:5515:4365:4…
50662	coenzyme binding	50 out of 698 genes, 7.2%	152 out of 6473 background genes, 2.3%	3.72e-11	0	C1_02740C_A:C1_02970W_A:GOR1:C1_08490W_A:ERG1:ZWF1:C1_10280C_A:GND1:ARO8:C2_00390C_A:BNA32:BNA31:IDP1:C2_06710W_A:GRE2:C2_07270W_A:PST2:PXP2:ILV2:NDE1:ALT1:C3_03680W_A:TDH3:DLD2:HIS5:PDC12:PYC2:ARG8:C4_05390W_A:ARO9:PDC11:OYE32:GLR1:GRP2:ILV5:EBP1:OYE2:OYE23:POX1:C7_03200C_A:CR_00130C_A:OYE22:LYS12:PDX3:FDH1:YCP4:PST3:CR_07250C_A:CR_08920W_A:CR_09010C_A	8483:3954:16638:16212:50625:4506:16491:16614:3690:16620:1990412:3997:287:4736:50840:36137:16831:3984:5496:5524:8793:4362:4733:47433:47964:16616:50661:43236:3677:47804:3700:4021:3992:3824:8144:30429:30976:47536:4075:4061:4458:8117:10181:8863:42562:70403:9374:3955:51287:8762:1990411:5515:4365:47046:4616:3857:50660:4400:3959:4737:3995:4121:4450:4345:4455:16627:1968:50662:42602:3723:30170
16614	oxidoreductase activity, acting on CH-OH group of donors	27 out of 698 genes, 3.9%	73 out of 6473 background genes, 1.1%	1.16e-06	0	GOR1:CSH1:IFD6:LPG20:ADH2:ERG1:ZWF1:CYB2:GND1:IDP1:FOX2:GCY1:DLD2:C4_05390W_A:GUT2:GRP2:GRE3:ADH1:ILV5:C7_03350C_A:LYS12:ADH5:FDH1:CR_07250C_A:CR_09100C_A:FDH3:XYL2	16652:18456:4090:4506:16491:16614:16747:3690:33833:287:4033:1990042:51268:4300:51903:47964:16616:50661:47019:3824:8144:4458:8863:4460:19170:51287:8270:47018:4032:50236:4368:8762:51269:32866:5515:47046:4616:3857:20037:50660:4022:3729:3939:4450:4345:4455:50662
3824	catalytic activity	47 out of 698 genes, 6.7%	180 out of 6473 background genes, 2.8%	1.54e-06	0	LEU4:C1_00410C_A:TTR1:C1_00860W_A:GEM1:C1_01360C_A:CTN1:UGA2:C1_02040C_A:SNZ1:EXG2:RAD16:LYS2:C1_02970W_A:GOR1:TPS2:CSH1:IFD6:C1_04460C_A:C1_04560W_A:DUR1,2:LPG20:C1_05160C_A:RAD10:C1_05830W_A:C1_06390W_A:GLT1:NPR1:CAT1:ATC1:PHO15:CDR4:TERT:NTG1:ADH2:CAF16:C1_08490W_A:ENO1:C1_08540C_A:ERG1:PFK26:ZWF1:AOX2:DAK2:LIP1:URA1:C1_09780C_A:C1_10280C_A:GCA1:C1_10310W_A:GCA2:NIT3:MRF1:LCB4:RIB3:PSA2:GUP1:C…	4143:4165:8483:42284:18456:5516:4090:17050:50625:4338:4396:4409:8233:16747:30955:8686:8379:4618:33919:8242:16597:4129:32542:4033:978:4340:4035:8972:4160:16813:50840:16810:15930:18576:18484:3960:4039:8199:36137:3984:4044:5524:4358:4722:8793:4362:42626:46547:4026:51903:4733:3906:47453:3844:4594:4794:16639:4402:35091:3684:34042:47433:30246:4697:47964:16616:4633:4559:50661:3697:3756:4519:4609:46538:1…
16616	oxidoreductase activity, acting on the CH-OH group of donors, NAD or NADP as acceptor	24 out of 698 genes, 3.4%	69 out of 6473 background genes, 1.1%	3.54e-05	0	GOR1:CSH1:IFD6:LPG20:ADH2:ERG1:ZWF1:GND1:IDP1:FOX2:GCY1:DLD2:C4_05390W_A:GRP2:GRE3:ADH1:ILV5:C7_03350C_A:LYS12:ADH5:FDH1:CR_09100C_A:FDH3:XYL2	18456:4090:16747:4033:51903:47964:16616:50661:3824:4458:8863:19170:50236:8762:5515:47046:3729:3939:4345:50662:16652:4506:16491:3690:33833:287:1990042:51268:4300:47019:8144:51287:8270:47018:4032:51269:32866:4616:3857:50660:4022:4450:4455
16209	antioxidant activity	15 out of 698 genes, 2.1%	32 out of 6473 background genes, 0.5%	0.0001	0	TTR1:CAT1:SOD6:C2_05060C_A:DOT5:CCP1:GTT12:TSA1:TSA1B:SOD1:AHP1:GLR1:TRR1:C6_00850W_A:TRX1	8379:32542:4362:50661:4602:16209:15035:43022:5507:8198:51920:4784:5515:4601:9055:16491:4364:46872:4096:3677:8785:51082:19207:15036:4791:20037:50660:15038:4130:47066:30985
43167	ion binding	169 out of 698 genes, 24.2%	1113 out of 6473 background genes, 17.2%	0.00015	0	C1_00430W_A:GEM1:C1_02740C_A:RAD16:LYS2:C1_02970W_A:C1_03450C_A:RPN4:TUS1:DUR1,2:NPR1:CCS1:CDR4:CAT8:ADH2:CAF16:UPC2:C1_08490W_A:ENO1:C1_08540C_A:ERG1:PFK26:DAK2:LYS142:CRP1:C1_09300C_A:STP2:SOD6:ARO8:C2_00390C_A:BCY1:COX17:C2_01310W_A:C2_01450C_A:C2_01870C_A:ZCF6:BNA32:BNA31:HSP78:STE11:C2_03910C_A:SSY1:YAK1:C2_05130W_A:PEX6:CDC19:IDP1:DBF2:C2_07070W_A:ZCF10:C2_07270W_A:RSP5:PST2:IFR1:ACS1:HRK1:…	8483:5543:16531:5516:30552:4090:50625:4396:70273:16747:30955:43495:16597:44604:1786:4340:978:18576:3960:4039:8199:36137:31681:3984:5524:8793:4362:42626:51903:4733:3906:3844:4594:35091:3684:47433:30246:4697:16616:50661:4559:17049:8603:47804:17076:16301:3992:3824:16773:30429:30976:32454:4075:4371:4458:8117:5089:10181:4743:70095:5078:9374:3955:4862:19170:5507:8198:43531:4709:334:16832:8762:18685:387…
16798	hydrolase activity, acting on glycosyl bonds	18 out of 698 genes, 2.6%	52 out of 6473 background genes, 0.8%	0.0016	0	EXG2:ATC1:NTG1:GCA1:GCA2:C2_03910C_A:C2_08420W_A:SGA1:C3_01820W_A:AMS1:CWH41:YDC1:ROT2:HEX1:FPG1:GLC3:CR_02800C_A:BGL22	4338:33919:3906:3844:3684:34042:30246:4559:4519:3824:4339:34039:34043:8534:4567:4563:4573:3905:16160:4555:16231:8725:3677:4571:8270:43169:4558:16811:5509:703:4553:71633
19842	vitamin binding	18 out of 698 genes, 2.6%	52 out of 6473 background genes, 0.8%	0.0016	0	LYS2:C1_02970W_A:C1_08490W_A:ARO8:C2_00390C_A:BNA32:BNA31:ILV2:ALT1:C3_03680W_A:HIS5:PDC12:PYC2:ARG8:ARO9:PDC11:CR_00130C_A:CR_09010C_A	8483:36137:3984:5524:8793:47433:47804:3992:3824:30429:30976:4075:8117:9374:4043:1990411:16212:1990412:287:4736:16831:31177:3677:4021:47536:4061:50660:4400:4737:4121:30170
16740	transferase activity	123 out of 698 genes, 17.6%	792 out of 6473 background genes, 12.2%	0.00297	0	LEU4:TTR1:C1_00860W_A:C1_01360C_A:CTN1:RAD16:C1_04560W_A:C1_05830W_A:NPR1:TERT:ADH2:ENO1:C1_08540C_A:PFK26:DAK2:C1_10310W_A:MRF1:LCB4:PSA2:GUP1:MUQ1:ARO8:POT1-2:ARO3:BNA31:THI20:BMT8:YIM1:STE11:BAT21:C2_04340C_A:LYS22:YAK1:CDC19:DBF2:ARE2:C2_07070W_A:RSP5:LEU42:IFR1:TPS3:ESA1:HRK1:C3_00940W_A:C3_02260C_A:ILV2:THI6:ALT1:GTT12:GTT11:C3_03760W_A:CTN3:ATF1:C3_04420W_A:PKC1:CMK1:C3_04970C_A:BAT22:C3_0…	4143:8483:5516:4090:17050:4396:8233:16747:30955:4618:8242:16597:4340:8972:3960:36137:3984:4044:5524:4358:8793:46547:4026:3844:4594:4402:35091:3684:4697:4789:16301:4602:3992:3824:16773:30976:8080:4371:3721:8171:4743:15035:4349:70095:4169:19170:34212:19776:4709:16906:4856:51377:4620:3872:35925:107:3810:4042:4144:5515:42736:3951:61630:5536:4306:309:4806:36374:4842:3729:9055:8353:16772:44016:4634:367…
10181	FMN binding	11 out of 698 genes, 1.6%	24 out of 6473 background genes, 0.4%	0.00588	0	C2_07270W_A:PST2:OYE32:EBP1:OYE2:OYE23:C7_03200C_A:OYE22:PDX3:YCP4:PST3	50625:4733:3824:10181:3955:3959:42602:16638:16491:5496:8144:42562
4553	hydrolase activity, hydrolyzing O-glycosyl compounds	15 out of 698 genes, 2.1%	42 out of 6473 background genes, 0.6%	0.00671	0	EXG2:ATC1:GCA1:GCA2:C2_03910C_A:SGA1:C3_01820W_A:AMS1:CWH41:YDC1:ROT2:HEX1:GLC3:CR_02800C_A:BGL22	4338:33919:3844:30246:4559:3824:4339:4567:4563:4573:16160:4555:16231:4571:8270:43169:4558:16811:5509:4553:71633
4601	peroxidase activity	9 out of 698 genes, 1.3%	17 out of 6473 background genes, 0.3%	0.00851	0	TTR1:CAT1:DOT5:CCP1:GTT12:TSA1:TSA1B:AHP1:C6_00850W_A	8379:4602:16209:15035:43022:51920:5515:4601:9055:16491:4364:4096:8785:51082:19207:15036:20037:15038:4130:47066:30985
19200	carbohydrate kinase activity	8 out of 698 genes, 1.1%	14 out of 6473 background genes, 0.2%	0.01213	0	PFK26:C2_04340C_A:XKS1:PFK1:PFK2:HXK2:GLK1:GLK4	4396:4340:5524:16301:3824:16773:70095:4856:3872:5536:3729:8865:3873:46316:19158
16684	oxidoreductase activity, acting on peroxide as acceptor	9 out of 698 genes, 1.3%	18 out of 6473 background genes, 0.3%	0.01541	0.0012	TTR1:CAT1:DOT5:CCP1:GTT12:TSA1:TSA1B:AHP1:C6_00850W_A	8379:4602:16209:15035:43022:51920:5515:4601:9055:16491:4364:4096:8785:51082:19207:15036:20037:15038:4130:47066:30985
16829	lyase activity	21 out of 698 genes, 3.0%	80 out of 6473 background genes, 1.2%	0.03163	0.0024	SNZ1:C1_02970W_A:ENO1:RIB3:C2_00390C_A:CHA1:C2_01450C_A:ILV1:FOX2:GLX3:C3_03680W_A:C3_06280W_A:FBA1:LYS4:PDC11:THR4:PSD2:ILV3:C6_02030C_A:LEU1:CAB3	4409:8686:4160:47453:4794:47433:4633:4609:47804:3824:30976:8117:36381:16832:16841:3810:1990411:5515:19172:51539:8081:4634:3941:4359:4795:16491:52855:1990412:287:46872:16831:4300:3861:18820:8270:3857:4737:4121:4332:30985:30170
43169	cation binding	79 out of 698 genes, 11.3%	489 out of 6473 background genes, 7.6%	0.04308	0.0033	GEM1:RAD16:RPN4:DUR1,2:CCS1:CAT8:ADH2:UPC2:ENO1:LYS142:CRP1:C1_09300C_A:STP2:SOD6:COX17:C2_01450C_A:C2_01870C_A:ZCF6:C2_03910C_A:C2_05130W_A:CDC19:IDP1:C2_07070W_A:ZCF10:IFR1:ACS1:VPS8:C3_00940W_A:C3_01130C_A:C3_01220W_A:ZCF8:ILV2:ZCF16:ZCF32:TRY4:TEA1:CTA4:FCR1:C4_00260W_A:FBA1:PDC12:ZCF25:C4_02230C_A:SOD1:AMS1:RGT1:C4_02570C_A:C4_02690W_A:C4_03600C_A:SCS7:PDC11:C5_02690W_A:TRR1:ZCF13:GLN3:ADH1:…	16531:4090:16747:30955:43495:978:18576:3960:4039:8199:3984:5524:51903:3906:3844:3684:47433:30246:16616:4559:17076:3824:30976:32454:4075:4743:19170:5507:8198:334:16832:18685:3987:35925:3810:4784:5515:5525:16884:61630:8534:34649:4842:43565:3959:8081:9055:43682:16701:4634:8941:4497:3676:3939:1228:80132:31210:1901611:32453:5506:16491:33833:16880:981:287:46872:1010:4847:8094:16712:34648:4040:3677:3700…
Cellular component
GOID	GO_term	Cluster frequency	Background frequency	Corrected P-value	False discovery rate	Gene(s) annotated to the term	Directly Annotated GOID List
31012	extracellular matrix	27 out of 698 genes, 3.9%	74 out of 6473 background genes, 1.1%	1.06e-06	0	TTR1:C1_03510C_A:OFR1:ADH2:ENO1:NIT3:RIB3:GND1:GPM1:GLX3:HEM13:TDH3:GCY1:TPI1:PDC11:THR4:TRR1:GRP2:ADH1:PGK1:CIP1:DOG1:IFR2:FDH1:PST3:PGI1:TRX1	5622:5737:9986:5829:5758:5777:5739:324:932:16021:5886:9277:9279:31934:16020:5634:15:5811:9897:30445:10494:5576:45121:30446:62040
44421	extracellular region part	27 out of 698 genes, 3.9%	74 out of 6473 background genes, 1.1%	1.06e-06	0	TTR1:C1_03510C_A:OFR1:ADH2:ENO1:NIT3:RIB3:GND1:GPM1:GLX3:HEM13:TDH3:GCY1:TPI1:PDC11:THR4:TRR1:GRP2:ADH1:PGK1:CIP1:DOG1:IFR2:FDH1:PST3:PGI1:TRX1	5622:5737:9986:5829:5758:5777:5739:324:932:16021:5886:9277:9279:31934:16020:5634:15:5811:9897:30445:10494:5576:45121:30446:62040
62039	biofilm matrix	27 out of 698 genes, 3.9%	74 out of 6473 background genes, 1.1%	1.06e-06	0	TTR1:C1_03510C_A:OFR1:ADH2:ENO1:NIT3:RIB3:GND1:GPM1:GLX3:HEM13:TDH3:GCY1:TPI1:PDC11:THR4:TRR1:GRP2:ADH1:PGK1:CIP1:DOG1:IFR2:FDH1:PST3:PGI1:TRX1	5622:5737:9986:5829:5758:5777:5739:324:932:16021:5886:9277:9279:31934:16020:5634:15:5811:9897:30445:10494:5576:45121:30446:62040
62040	fungal biofilm matrix	27 out of 698 genes, 3.9%	74 out of 6473 background genes, 1.1%	1.06e-06	0	TTR1:C1_03510C_A:OFR1:ADH2:ENO1:NIT3:RIB3:GND1:GPM1:GLX3:HEM13:TDH3:GCY1:TPI1:PDC11:THR4:TRR1:GRP2:ADH1:PGK1:CIP1:DOG1:IFR2:FDH1:PST3:PGI1:TRX1	5622:5737:9986:5829:5758:5777:5739:324:932:16021:5886:9277:9279:31934:16020:5634:15:5811:9897:30445:10494:5576:45121:30446:62040
5576	extracellular region	45 out of 698 genes, 6.4%	191 out of 6473 background genes, 3.0%	6.05e-05	0	TTR1:GOR1:C1_03510C_A:ATC1:OFR1:ADH2:ENO1:LIP1:GCA1:GCA2:NIT3:RIB3:HYR1:GND1:NCR1:GPM1:IDP1:C2_07650C_A:GLX3:HEM13:TDH3:GCY1:TPI1:C4_01800W_A:SOD1:C4_04140W_A:GDH3:PDC11:THR4:TRR1:GRP2:GRE3:HEX1:ADH1:PGA4:PGK1:CIP1:DOG1:LIP4:C7_02450W_A:IFR2:FDH1:PST3:PGI1:TRX1	5622:5737:5628:9986:5829:5758:5777:5739:42645:31160:46658:324:932:329:16021:5886:30287:9277:9279:31934:16020:5634:15:5811:9897:30445:10494:5576:45121:30446:62040
42579	microbody	23 out of 698 genes, 3.3%	70 out of 6473 background genes, 1.1%	0.00013	0	C1_04560W_A:CAT1:ZWF1:C1_11010C_A:GND1:C2_00390C_A:PEX6:IDP1:FOX2:PXP2:CTN3:C3_04800C_A:PEX5:PEX4:C6_00850W_A:PEX7:POX1:PXA1:OPT3:CR_02570C_A:PEX19:ECI1:PEX13	5737:5622:5829:5758:5783:5739:5777:42645:5782:5779:16021:5886:5759:9277:138:1990429:5778:1990415:5576:62040:34657
5777	peroxisome	23 out of 698 genes, 3.3%	70 out of 6473 background genes, 1.1%	0.00013	0	C1_04560W_A:CAT1:ZWF1:C1_11010C_A:GND1:C2_00390C_A:PEX6:IDP1:FOX2:PXP2:CTN3:C3_04800C_A:PEX5:PEX4:C6_00850W_A:PEX7:POX1:PXA1:OPT3:CR_02570C_A:PEX19:ECI1:PEX13	5737:5622:5829:5758:5783:5739:5777:42645:5782:5779:16021:5886:5759:9277:138:1990429:5778:1990415:5576:62040:34657
30446	hyphal cell wall	19 out of 698 genes, 2.7%	69 out of 6473 background genes, 1.1%	0.02224	0.0025	CSH1:ENO1:HYR1:GPM1:CDC19:PST2:GLX3:TSA1:TSA1B:TDH3:TPI1:FBA1:AHP1:PDC11:ADH1:PGA4:PGK1:EBP1:XYL2	5737:5622:5628:9986:5829:5758:5739:46658:324:932:5886:5844:9277:16020:5634:15:5811:9897:30445:10494:5576:30446:62040
Downregulated gene set
Biological process
GOID	GO_term	Cluster frequency	Background frequency	Corrected P-value	False discovery rate	Gene(s) annotated to the term	Directly Annotated GOID List
34470	ncRNA processing	172 out of 848 genes, 20.3%	316 out of 6473 background genes, 4.9%	2.18e-70	0	HBR1:RRS1:C1_01150C_A:C1_01160C_A:TRM2:ABP140:TSR2:RPP1:C1_03830C_A:RRP6:C1_05360C_A:C1_06540C_A:C1_06760C_A:LHP1:MTO1:C1_07950C_A:C1_07960W_A:DIP2:C1_09390W_A:C1_09710C_A:C1_09790C_A:C1_10880W_A:C1_10950C_A:C1_11000C_A:C1_11160C_A:NEP1:KRR1:CSI2:C1_12350W_A:C1_12440W_A:DIM1:C1_14080W_A:MPP10:HMA1:C2_00820W_A:C2_01510C_A:REX2:C2_02120W_A:UTP21:UTP22:C2_02710C_A:C2_03000C_A:C2_04700C_A:C2_04820W_A…	398:61818:6397:34473:6363:45944:71050:43629:55:70507:30447:27:36261:463:42274:31119:42797:70525:1990180:6284:71047:42254:6468:71038:1905267:1990120:30541:6401:110064:30174:71040:294:17183:7114:8152:30010:43144:6450:34427:71036:43248:321:1300:36166:71027:30847:1901917:71035:1902626:2:51017:71033:70481:42780:973:1902375:34476:42779:31123:30490:6351:465:184:72670:915:30702:6386:140018:70899:34599:34…
34660	ncRNA metabolic process	182 out of 848 genes, 21.5%	373 out of 6473 background genes, 5.8%	9.87e-65	0	HBR1:RRS1:C1_01150C_A:C1_01160C_A:TRM2:ABP140:TSR2:RPP1:C1_03830C_A:RRP6:C1_05360C_A:C1_06540C_A:C1_06760C_A:LHP1:MTO1:C1_07950C_A:C1_07960W_A:DIP2:C1_09390W_A:C1_09710C_A:C1_09790C_A:C1_10880W_A:C1_10950C_A:C1_11000C_A:C1_11160C_A:NEP1:KRR1:GAR1:CSI2:C1_12350W_A:C1_12440W_A:DIM1:C1_14080W_A:MPP10:HMA1:C2_00820W_A:C2_01510C_A:REX2:C2_02120W_A:UTP21:UTP22:C2_02710C_A:C2_03000C_A:TBF1:C2_04700C_A:C…	398:61818:6397:34473:6363:16074:45944:71050:43629:55:70507:30447:27:36261:463:42274:31119:42797:70525:1990180:6284:71047:42254:6468:71038:1905267:1990120:30541:6401:110064:30174:71040:70681:294:17183:7114:8152:30010:43144:6450:34427:71036:43248:321:1300:36166:71027:30847:1901917:71035:1902626:2:51017:71033:70481:42780:973:1902375:42779:34476:31123:6355:30490:6351:465:184:72670:915:30702:6386:1400…
42254	ribosome biogenesis	161 out of 848 genes, 19.0%	305 out of 6473 background genes, 4.7%	7.73e-63	0	HBR1:RRS1:C1_01160C_A:C1_02450C_A:TSR2:ARX1:RLI1:RPP1:C1_03830C_A:C1_04710C_A:C1_04820C_A:RRP6:REI1:C1_06540C_A:C1_06760C_A:C1_07950C_A:C1_07960W_A:DIP2:JIP5:C1_09040C_A:YTM1:C1_09710C_A:C1_10880W_A:C1_10950C_A:C1_11000C_A:NEP1:KRR1:GAR1:CSI2:C1_12350W_A:C1_12440W_A:C1_12680W_A:DIM1:C1_14080W_A:MPP10:REX2:C2_02120W_A:UTP21:UTP22:C2_02710C_A:C2_03000C_A:C2_04700C_A:C2_04820W_A:C2_05160C_A:RPF2:LAS…	398:6397:34473:6363:43629:45944:55:70507:30447:6913:27:2000786:1902775:463:42274:42254:6468:71038:30476:1905267:1990120:30541:6401:110064:30174:71040:294:8152:30010:43144:6450:34427:71036:43248:2000200:321:17148:36166:71027:30847:1901917:71035:1902626:19933:2:110136:71033:70481:973:34476:30490:465:184:915:30702:34599:30163:9267:6267:1990417:2181:71044:6412:154:48025:494:42256:71042:6606:747:20002…
6396	RNA processing	199 out of 848 genes, 23.5%	451 out of 6473 background genes, 7.0%	5.06e-62	0	HBR1:RRS1:C1_01150C_A:C1_01160C_A:TRM2:C1_02090C_A:ABP140:TSR2:RPP1:C1_03830C_A:RRP6:C1_05360C_A:C1_06540C_A:C1_06760C_A:LHP1:MTO1:MRPL3:C1_07950C_A:C1_07960W_A:DIP2:C1_08630W_A:MSS116:C1_09390W_A:C1_09710C_A:C1_09790C_A:BUD31:C1_10880W_A:C1_10950C_A:C1_11000C_A:PET127:C1_11160C_A:C1_11280W_A:NEP1:KRR1:CSI2:C1_12350W_A:C1_12440W_A:DIM1:C1_14080W_A:NPL3:MPP10:HMA1:C2_00820W_A:C2_01510C_A:REX2:C2_0…	61818:398:6397:34473:6363:1410:959:45944:71050:43629:55:70507:30447:27:36261:463:42274:31119:42797:70525:45292:1990180:6284:71047:42254:6468:71038:1905267:1990120:30541:6401:110064:30174:71040:71467:294:17183:7114:964:8152:350:30010:43144:6450:34427:71036:43248:321:1300:17148:34337:36166:71027:30847:1901917:43161:71035:6264:389:1902626:44182:2:51017:71033:70481:42780:32543:973:1902375:957:42779:3…
6364	rRNA processing	125 out of 848 genes, 14.7%	218 out of 6473 background genes, 3.4%	4.27e-53	0	HBR1:RRS1:C1_01160C_A:TSR2:RPP1:C1_03830C_A:RRP6:C1_06540C_A:C1_06760C_A:C1_07950C_A:C1_07960W_A:DIP2:C1_09710C_A:C1_10880W_A:C1_10950C_A:C1_11000C_A:NEP1:KRR1:CSI2:C1_12350W_A:C1_12440W_A:DIM1:C1_14080W_A:MPP10:REX2:C2_02120W_A:UTP21:UTP22:C2_02710C_A:C2_03000C_A:C2_04700C_A:C2_04820W_A:RPF2:LAS1:MAK16:C2_06660W_A:C2_06850W_A:NOC4:RCL1:RRP8:UTP15:RRP15:UTP8:BUD21:SOF1:C3_01560W_A:C3_02040C_A:C3_…	398:6397:34473:6363:43629:45944:55:70507:30447:27:463:42274:42254:6468:71038:1905267:1990120:30541:6401:110064:30174:71040:294:8152:30010:43144:6450:34427:71036:43248:321:36166:71027:30847:1901917:71035:1902626:2:71033:70481:973:34476:30490:465:184:915:30702:34599:30163:9267:6267:1990417:2181:71044:6412:154:48025:494:42256:71042:2000234:42273:36170:956:448:51083:45943:16075:920:460:70475:31167:82…
16072	rRNA metabolic process	128 out of 848 genes, 15.1%	230 out of 6473 background genes, 3.6%	2.11e-52	0	HBR1:RRS1:C1_01160C_A:TSR2:RPP1:C1_03830C_A:RRP6:C1_05360C_A:C1_06540C_A:C1_06760C_A:C1_07950C_A:C1_07960W_A:DIP2:C1_09710C_A:C1_09790C_A:C1_10880W_A:C1_10950C_A:C1_11000C_A:NEP1:KRR1:CSI2:C1_12350W_A:C1_12440W_A:DIM1:C1_14080W_A:MPP10:REX2:C2_02120W_A:UTP21:UTP22:C2_02710C_A:C2_03000C_A:C2_04700C_A:C2_04820W_A:RPF2:LAS1:MAK16:C2_06660W_A:C2_06850W_A:NOC4:RCL1:RRP8:UTP15:RRP15:UTP8:BUD21:SOF1:C3_…	398:6397:34473:6363:45944:71050:43629:55:70507:30447:27:463:42274:6284:71047:42254:6468:71038:1905267:1990120:30541:6401:110064:30174:71040:294:8152:30010:43144:6450:34427:71036:43248:321:36166:71027:30847:1901917:71035:1902626:2:71033:70481:973:34476:31123:30490:465:184:915:30702:34599:30163:9267:6267:1990417:2181:71044:6412:154:48025:494:42256:71042:2000234:42273:36170:956:448:51083:45943:16075…
22613	ribonucleoprotein complex biogenesis	167 out of 848 genes, 19.7%	376 out of 6473 background genes, 5.8%	2.36e-51	0	HBR1:RRS1:C1_01160C_A:C1_02450C_A:TSR2:ARX1:RLI1:RPP1:C1_03830C_A:C1_04710C_A:C1_04820C_A:RRP6:REI1:C1_06540C_A:C1_06760C_A:C1_07950C_A:C1_07960W_A:DIP2:JIP5:C1_09040C_A:YTM1:C1_09710C_A:C1_10880W_A:C1_10950C_A:C1_11000C_A:NEP1:KRR1:GAR1:CSI2:C1_12350W_A:C1_12440W_A:C1_12680W_A:DIM1:C1_14080W_A:MPP10:REX2:C2_02120W_A:UTP21:UTP22:C2_02710C_A:C2_03000C_A:C2_04700C_A:C2_04820W_A:C2_05160C_A:RPF2:C2_…	398:6397:34473:6363:43629:45944:55:70507:30447:6913:27:2000786:1902775:463:42274:42254:6468:71038:30476:1905267:1990120:30541:6401:110064:30174:71040:294:8152:350:1731:30010:43144:6450:34427:71036:1732:43248:2000200:321:17148:36166:71027:30847:1901917:71035:389:1902626:19933:2:110136:71033:70481:973:34476:30490:465:184:915:30702:34599:30163:9267:6267:1990417:2181:71044:6412:154:48025:494:42256:71…
16070	RNA metabolic process	252 out of 848 genes, 29.7%	776 out of 6473 background genes, 12.0%	6.96e-49	0	HBR1:RPO41:RRS1:C1_01150C_A:C1_01160C_A:TRM2:C1_01860W_A:C1_02090C_A:ABP140:TSR2:RPP1:C1_03830C_A:ESS1:RRP6:C1_05230W_A:C1_05360C_A:C1_06540C_A:C1_06760C_A:LHP1:MTO1:MRPL3:C1_07950C_A:C1_07960W_A:DIP2:C1_08630W_A:MSS116:C1_09390W_A:C1_09710C_A:C1_09790C_A:BUD31:RPA34:TBP1:C1_10880W_A:C1_10950C_A:C1_11000C_A:PET127:C1_11160C_A:C1_11280W_A:NEP1:KRR1:GAR1:CSI2:C1_12350W_A:C1_12440W_A:C1_12820C_A:DIM…	61818:60261:6974:1410:959:35307:6279:70893:6361:7329:16074:71050:43629:45944:1193:55:70507:30447:1902775:6281:36261:463:70525:45292:71483:71047:42254:30174:71040:9113:45848:45899:7114:350:7121:100036:1990678:6038:43248:71027:1900239:6334:389:1902626:44182:1080:71033:70481:42780:1902375:957:34476:9299:2001040:465:6351:184:72670:6366:30702:6386:140018:2183:70899:34414:34599:70131:30163:10526:32210:…
10467	gene expression	310 out of 848 genes, 36.6%	1142 out of 6473 background genes, 17.6%	3.64e-43	0	HBR1:RPO41:RRS1:C1_00980W_A:HMT1:C1_01150C_A:C1_01160C_A:TRM2:C1_01580W_A:MRP20:C1_01860W_A:C1_02090C_A:ABP140:TSR2:RLI1:RPP1:C1_03830C_A:C1_04370C_A:ESS1:C1_04820C_A:RRP6:C1_05230W_A:C1_05360C_A:RSM22:C1_06070W_A:C1_06540C_A:C1_06760C_A:MRPL19:LHP1:MTO1:MRPL3:C1_07950C_A:C1_07960W_A:DRG1:C1_08110W_A:DIP2:C1_08630W_A:MSS116:C1_09390W_A:C1_09710C_A:C1_09790C_A:BUD31:RPA34:RPL42:C1_10470W_A:TBP1:C1…	61818:60261:6974:1410:959:35307:70893:44237:6361:71050:43629:45944:1193:55:70507:30447:60188:36261:463:70525:45292:71047:42254:55088:30174:71040:9113:45848:45899:7114:350:100036:226:1732:1990678:43248:71027:6627:1900239:6334:389:1902626:44182:1903833:1080:71033:70481:42780:1902375:957:34476:9299:465:6351:184:72670:6366:30702:6386:140018:2183:70899:34414:34599:70131:70126:30163:10526:32210:6267:19…
90304	nucleic acid metabolic process	267 out of 848 genes, 31.5%	1038 out of 6473 background genes, 16.0%	6.58e-31	0	HBR1:RPO41:RRS1:C1_01150C_A:C1_01160C_A:TRM2:C1_01860W_A:C1_02090C_A:ABP140:MGM101:TSR2:RPP1:C1_03830C_A:HTA2:ESS1:RRP6:C1_05230W_A:C1_05270C_A:C1_05360C_A:C1_06540C_A:C1_06760C_A:LHP1:MTO1:MRPL3:C1_07950C_A:C1_07960W_A:DIP2:C1_08630W_A:MSS116:C1_09390W_A:C1_09710C_A:C1_09790C_A:BUD31:RPA34:TBP1:C1_10880W_A:C1_10950C_A:C1_11000C_A:PET127:C1_11160C_A:C1_11280W_A:NEP1:KRR1:GAR1:CSI2:C1_12350W_A:C1_…	61818:60261:6974:1410:959:35307:6279:70893:6361:7329:16074:71050:43629:45944:1193:55:70507:31939:30447:1902775:36261:463:6281:43409:7004:70525:45292:71483:71047:42254:30174:71040:9113:45848:45899:7114:350:7121:100036:1990678:6038:43248:71027:1900239:389:1902626:44182:6334:6312:727:1080:71033:70481:42276:42780:1902375:957:34476:9299:7127:2001040:465:6351:184:72670:6366:30702:6386:30466:140018:2183…
6139	nucleobase-containing compound metabolic process	292 out of 848 genes, 34.4%	1205 out of 6473 background genes, 18.6%	2.09e-29	0	HBR1:RPO41:RRS1:C1_01150C_A:C1_01160C_A:TRM2:C1_01860W_A:C1_02090C_A:ABP140:MGM101:TSR2:RPP1:C1_03830C_A:HTA2:ESS1:RRP6:C1_05230W_A:C1_05270C_A:C1_05360C_A:C1_06540C_A:C1_06760C_A:LHP1:MTO1:ADE5,7:MRPL3:C1_07950C_A:C1_07960W_A:DIP2:C1_08630W_A:MSS116:C1_09390W_A:ERG12:GUA1:C1_09710C_A:C1_09790C_A:BUD31:RPA34:TBP1:C1_10880W_A:C1_10950C_A:C1_11000C_A:PET127:C1_11160C_A:C1_11280W_A:NEP1:KRR1:GAR1:CS…	61818:32:60261:6974:1410:959:35307:6279:70893:6361:7329:16074:71050:43629:45944:1193:9435:55:70507:31939:30447:1902775:36261:463:6281:55085:43409:7004:9272:43103:70525:45292:71483:71047:42254:30174:71040:9113:45848:45899:742:45984:7114:6807:6541:350:7121:100036:1990678:6038:43248:71027:1900239:389:1902626:44182:6334:6312:727:6177:1080:71033:70481:42276:42780:1902375:957:34476:9299:7127:2001040:46…
42274	ribosomal small subunit biogenesis	68 out of 848 genes, 8.0%	118 out of 6473 background genes, 1.8%	1.26e-27	0	HBR1:RRS1:TSR2:RPP1:DIP2:C1_09710C_A:C1_10880W_A:C1_10950C_A:NEP1:KRR1:DIM1:C1_14080W_A:MPP10:C2_02710C_A:C2_03000C_A:C2_04700C_A:C2_06850W_A:NOC4:RCL1:UTP15:UTP8:BUD21:SOF1:C3_01560W_A:C3_02040C_A:C3_02840W_A:HBR3:C3_04380C_A:NOP14:C3_06370C_A:C3_07550C_A:UTP9:C3_07800C_A:NAN1:C4_05650W_A:BUD23:FYV5:C5_01540W_A:UTP13:C5_03920C_A:HAS1:C5_04840C_A:C5_04910W_A:NOP5:C6_01040C_A:C7_01030C_A:C7_02930C…	55:30447:463:42254:43248:71027:34599:1990417:154:2000234:447:46777:480:70476:6970:10468:6396:32880:6409:472:398:42274:6468:1905267:294:8152:30010:321:36166:30490:9267:6412:42273:36170:1904669:45943:920:70475:8298:16479:462:71216:56:469:36180:42255:466:16973:28:1904812:8033:6364:46830:461:34965:390:35690:7096
34641	cellular nitrogen compound metabolic process	359 out of 848 genes, 42.3%	1662 out of 6473 background genes, 25.7%	4.82e-27	0	HBR1:RPO41:RRS1:C1_00980W_A:C1_01150C_A:C1_01160C_A:TRM2:C1_01580W_A:MRP20:C1_01860W_A:C1_02090C_A:ABP140:MGM101:TSR2:RLI1:RPP1:C1_03830C_A:HTA2:C1_04370C_A:ESS1:C1_04820C_A:RRP6:C1_05230W_A:C1_05270C_A:C1_05360C_A:RSM22:C1_06070W_A:C1_06540C_A:C1_06760C_A:MRPL19:YMC1:LHP1:MTO1:ADE5,7:MRPL3:C1_07950C_A:C1_07960W_A:DRG1:DIP2:C1_08630W_A:MSS116:C1_09390W_A:ERG12:GUA1:C1_09710C_A:C1_09790C_A:BUD31:R…	61818:32:60261:6974:1410:959:35307:6279:70893:44237:6361:7329:16074:71050:43629:45944:1193:9435:55:70507:31939:30447:1901300:1902775:36261:463:6281:55085:43409:7004:9272:43103:70525:45292:71483:71047:42254:30174:71040:9113:45848:45899:742:45984:7114:6807:6541:350:8295:7121:100036:1732:1990678:6038:43248:16226:71027:1900239:389:1902626:44182:6334:6312:727:6177:1903833:1080:43605:71033:32995:70481:…
30490	maturation of SSU-rRNA	61 out of 848 genes, 7.2%	102 out of 6473 background genes, 1.6%	8.67e-26	0	HBR1:RRS1:TSR2:RPP1:DIP2:C1_09710C_A:C1_10880W_A:C1_10950C_A:NEP1:KRR1:DIM1:C1_14080W_A:MPP10:C2_03000C_A:C2_04700C_A:C2_06850W_A:NOC4:RCL1:UTP15:UTP8:BUD21:SOF1:C3_01560W_A:C3_02040C_A:C3_02840W_A:HBR3:C3_04380C_A:NOP14:C3_06370C_A:C3_07550C_A:UTP9:C3_07800C_A:NAN1:C4_05650W_A:BUD23:FYV5:C5_01540W_A:UTP13:C5_03920C_A:HAS1:C5_04840C_A:C5_04910W_A:NOP5:C6_01040C_A:C7_01030C_A:C7_02930C_A:ENP2:ENP1…	55:30447:463:42254:43248:71027:34599:1990417:154:2000234:447:46777:480:70476:10468:6396:6409:472:398:42274:6468:1905267:294:8152:30010:321:36166:30490:9267:6412:42273:36170:45943:920:70475:8298:16479:462:71216:56:469:36180:42255:466:16973:28:1904812:8033:6364:46830:461:34965:390:35690:7096
6725	cellular aromatic compound metabolic process	296 out of 848 genes, 34.9%	1285 out of 6473 background genes, 19.9%	1.38e-25	0	HBR1:RPO41:RRS1:C1_01150C_A:C1_01160C_A:TRM2:C1_01860W_A:C1_02090C_A:ABP140:MGM101:TSR2:RPP1:C1_03830C_A:HTA2:ESS1:RRP6:C1_05230W_A:C1_05270C_A:C1_05360C_A:C1_06540C_A:C1_06760C_A:YMC1:LHP1:MTO1:ADE5,7:MRPL3:C1_07950C_A:C1_07960W_A:DIP2:C1_08630W_A:MSS116:C1_09390W_A:ERG12:GUA1:C1_09710C_A:C1_09790C_A:BUD31:RPA34:TBP1:C1_10880W_A:C1_10950C_A:C1_11000C_A:PET127:C1_11160C_A:C1_11280W_A:NEP1:KRR1:GA…	61818:32:60261:6974:1410:959:35307:6279:70893:6361:7329:16074:71050:43629:45944:1193:9435:55:70507:31939:30447:1902775:36261:463:6281:55085:43409:7004:9272:43103:70525:45292:71483:71047:42254:30174:71040:9113:45848:45899:742:45984:7114:6807:6541:350:7121:100036:1990678:6038:43248:71027:1900239:389:1902626:44182:6334:6312:727:6177:1080:71033:70481:42276:42780:1902375:957:34476:9299:7127:2001040:46…
46483	heterocycle metabolic process	297 out of 848 genes, 35.0%	1298 out of 6473 background genes, 20.1%	3.82e-25	0	HBR1:RPO41:RRS1:C1_01150C_A:C1_01160C_A:TRM2:C1_01860W_A:C1_02090C_A:ABP140:MGM101:TSR2:RPP1:C1_03830C_A:HTA2:ESS1:RRP6:C1_05230W_A:C1_05270C_A:C1_05360C_A:C1_06540C_A:C1_06760C_A:YMC1:LHP1:MTO1:ADE5,7:MRPL3:C1_07950C_A:C1_07960W_A:DIP2:C1_08630W_A:MSS116:C1_09390W_A:ERG12:GUA1:C1_09710C_A:C1_09790C_A:BUD31:RPA34:TBP1:C1_10880W_A:C1_10950C_A:C1_11000C_A:PET127:C1_11160C_A:C1_11280W_A:NEP1:KRR1:GA…	61818:32:60261:6974:1410:959:35307:6279:70893:6361:7329:16074:71050:43629:45944:1193:9435:55:70507:31939:30447:1902775:36261:463:6281:55085:43409:7004:9272:43103:70525:45292:71483:71047:42254:30174:71040:9113:45848:45899:742:45984:7114:6807:6541:350:7121:100036:1990678:6038:43248:71027:1900239:389:1902626:44182:6334:6312:727:6177:1080:71033:6561:70481:42276:42780:1902375:957:34476:9299:7127:20010…
460	maturation of 5.8S rRNA	54 out of 848 genes, 6.4%	84 out of 6473 background genes, 1.3%	7.75e-25	0	RRS1:C1_01160C_A:RPP1:C1_03830C_A:RRP6:C1_06540C_A:C1_07960W_A:DIP2:C1_09710C_A:C1_10880W_A:NEP1:KRR1:CSI2:C1_12350W_A:C1_14080W_A:MPP10:REX2:RPF2:LAS1:MAK16:C2_06660W_A:NOC4:RCL1:RRP15:BUD21:C3_01560W_A:C3_02040C_A:C3_02840W_A:NOP14:C3_05160C_A:C3_06370C_A:NSA2:C3_07800C_A:C4_02090C_A:RPF1:RRP42:C4_05330C_A:BUD23:UTP13:C5_03920C_A:C5_04840C_A:NOP5:CIC1:C7_03400C_A:ENP1:UTP18:PWP2:CR_02550C_A:CR_…	43629:55:70507:30447:463:42254:71040:43248:71027:1902626:71033:70481:34476:465:30702:30163:71042:460:447:43628:480:467:70476:71049:6396:34475:6139:33621:71046:32956:70651:464:472:34473:6363:27:42274:71038:1905267:6401:110064:294:8152:30010:34427:71036:30847:1901917:71035:2:973:30490:9267:71044:6412:42256:42273:36170:448:45943:16075:920:70475:8298:71028:70478:71039:462:71216:71051:56:71037:54:470:…
466	maturation of 5.8S rRNA from tricistronic rRNA transcript (SSU-rRNA, 5.8S rRNA, LSU-rRNA)	54 out of 848 genes, 6.4%	84 out of 6473 background genes, 1.3%	7.75e-25	0	RRS1:C1_01160C_A:RPP1:C1_03830C_A:RRP6:C1_06540C_A:C1_07960W_A:DIP2:C1_09710C_A:C1_10880W_A:NEP1:KRR1:CSI2:C1_12350W_A:C1_14080W_A:MPP10:REX2:RPF2:LAS1:MAK16:C2_06660W_A:NOC4:RCL1:RRP15:BUD21:C3_01560W_A:C3_02040C_A:C3_02840W_A:NOP14:C3_05160C_A:C3_06370C_A:NSA2:C3_07800C_A:C4_02090C_A:RPF1:RRP42:C4_05330C_A:BUD23:UTP13:C5_03920C_A:C5_04840C_A:NOP5:CIC1:C7_03400C_A:ENP1:UTP18:PWP2:CR_02550C_A:CR_…	43629:55:70507:30447:463:42254:71040:43248:71027:1902626:71033:70481:34476:465:30702:30163:71042:460:447:43628:480:467:70476:71049:6396:34475:6139:33621:71046:32956:70651:464:472:34473:6363:27:42274:71038:1905267:6401:110064:294:8152:30010:34427:71036:30847:1901917:71035:2:973:30490:9267:71044:6412:42256:42273:36170:448:45943:16075:920:70475:8298:71028:70478:71039:462:71216:71051:56:71037:54:470:…
462	maturation of SSU-rRNA from tricistronic rRNA transcript (SSU-rRNA, 5.8S rRNA, LSU-rRNA)	56 out of 848 genes, 6.6%	91 out of 6473 background genes, 1.4%	2.12e-24	0	HBR1:RRS1:TSR2:RPP1:DIP2:C1_09710C_A:C1_10880W_A:C1_10950C_A:NEP1:KRR1:DIM1:C1_14080W_A:MPP10:C2_04700C_A:C2_06850W_A:NOC4:RCL1:UTP15:UTP8:BUD21:SOF1:C3_01560W_A:C3_02040C_A:C3_02840W_A:HBR3:C3_04380C_A:NOP14:C3_06370C_A:UTP9:C3_07800C_A:NAN1:C4_05650W_A:BUD23:FYV5:C5_01540W_A:UTP13:C5_03920C_A:HAS1:C5_04840C_A:C5_04910W_A:NOP5:C6_01040C_A:C7_01030C_A:ENP2:ENP1:UTP18:PWP2:CR_03360W_A:DBP8:CR_0684…	55:30447:463:42254:43248:71027:34599:1990417:154:2000234:447:46777:480:70476:10468:6396:6409:472:398:42274:6468:1905267:294:8152:30010:321:36166:30490:9267:6412:42273:36170:45943:920:70475:8298:16479:462:71216:56:469:36180:42255:466:16973:28:8033:6364:46830:461:34965:390:35690:7096
9451	RNA modification	56 out of 848 genes, 6.6%	96 out of 6473 background genes, 1.5%	1.02e-22	0	C1_01150C_A:TRM2:ABP140:C1_05360C_A:MTO1:C1_09390W_A:C1_09790C_A:C1_11160C_A:NEP1:GAR1:DIM1:HMA1:C2_00820W_A:C2_01510C_A:C2_02120W_A:C2_04820W_A:KTI11:C2_06480W_A:C2_07360W_A:RRP8:C2_09500W_A:SMM1:C3_05140C_A:ELP3:C3_07400W_A:RIT1:C4_00810C_A:C4_01500W_A:C4_02850W_A:C4_03140C_A:C4_03830W_A:C4_04810C_A:FMT1:NOP1:BUD23:C5_01610W_A:C6_02290C_A:C6_02350C_A:C7_00330C_A:THG1:C7_02340C_A:C7_03990C_A:CR_…	45944:71050:43629:463:36261:70525:71047:42254:71040:7114:1902626:72670:140018:70899:34599:32210:9452:17126:154:71042:19988:2143:34227:723:2939:2926:447:480:70476:51321:6400:31118:6396:6391:1522:9058:34475:71046:106004:2940:1403:6448:6357:472:493:42274:31119:6284:71038:17183:8152:43144:6450:71036:1300:71035:51017:31123:30488:2181:71044:1990481:494:2949:42273:61504:6413:70475:32447:31167:71039:462:…
1901360	organic cyclic compound metabolic process	298 out of 848 genes, 35.1%	1353 out of 6473 background genes, 20.9%	3.85e-22	0	HBR1:RPO41:RRS1:C1_01150C_A:C1_01160C_A:TRM2:C1_01860W_A:C1_02090C_A:ABP140:MGM101:TSR2:RPP1:C1_03830C_A:HTA2:ESS1:RRP6:C1_05230W_A:C1_05270C_A:C1_05360C_A:C1_06540C_A:C1_06760C_A:YMC1:LHP1:MTO1:ADE5,7:MRPL3:C1_07950C_A:C1_07960W_A:DIP2:C1_08630W_A:MSS116:C1_09390W_A:ERG12:GUA1:C1_09710C_A:C1_09790C_A:BUD31:RPA34:TBP1:C1_10880W_A:C1_10950C_A:C1_11000C_A:PET127:C1_11160C_A:C1_11280W_A:NEP1:KRR1:GA…	61818:32:60261:6974:1410:959:35307:6279:70893:6361:7329:16074:71050:43629:45944:1193:9435:55:70507:31939:30447:1902775:36261:463:6281:55085:43409:7004:9272:43103:70525:45292:71483:71047:42254:30174:71040:9113:45848:45899:742:45984:7114:6807:6541:350:7121:100036:1990678:6038:43248:71027:1900239:389:1902626:44182:6334:6312:727:6177:1080:71033:6561:70481:42276:42780:1902375:957:34476:9299:7127:20010…
90501	RNA phosphodiester bond hydrolysis	54 out of 848 genes, 6.4%	97 out of 6473 background genes, 1.5%	1.82e-20	0	RRS1:C1_01160C_A:RPP1:C1_03830C_A:RRP6:C1_06540C_A:LHP1:C1_07960W_A:DIP2:C1_09710C_A:C1_10880W_A:NEP1:KRR1:CSI2:C1_12350W_A:C1_14080W_A:MPP10:REX2:LAS1:C2_06120C_A:C2_06660W_A:NOC4:RCL1:RPC11:BUD21:C3_00420W_A:C3_02040C_A:C3_02840W_A:NOP14:C3_06370C_A:C3_07800C_A:C4_02090C_A:SEN2:RRP42:BUD23:C5_02480W_A:UTP13:C5_03920C_A:C5_04840C_A:NOP5:POP4:C7_03400C_A:ENP1:UTP18:PWP2:CR_02550C_A:CR_03360W_A:NH…	61818:43629:55:30447:463:42254:71040:43248:71027:71033:70481:42780:1902375:34476:6351:465:30702:6386:34414:71042:98789:98787:460:447:43628:379:480:6388:467:70476:31118:71049:6396:34475:6139:33621:71046:70651:464:6379:472:34473:6363:27:42274:42797:1990180:71038:1905267:6401:110064:294:8152:30010:34427:71036:30847:1901917:43161:71035:2:973:42779:9267:71044:42273:36170:448:6378:45943:16075:920:70475…
[truncated: 182 more rows]

## Sheet: Part 7
Supplementary Table 2 Results of the gene set enrichment analysis
Part 7 – cappz1 strain BM+MSB treated vs. cappz1 strain untreated
Upregulated gene set
Biological process
GOID	GO_term	Cluster frequency	Background frequency	Corrected P-value	False discovery rate	Gene(s) annotated to the term	Directly Annotated GOID List
[truncated: 320 more rows]
