# Supplementary material for: The Negative Effect of Protein Phosphatase Z1 Deletion on the Oxidative Stress Tolerance of Candida albicans Is Synergistic with Betamethasone Exposure
Source: J Fungi (Basel). 2021 Jul 6;7(7):540. doi: 10.3390/jof7070540 (PMC8305657; doi:10.3390/jof7070540)
Supplement: Supplementary file 1 [file jof-07-00540-s001.zip › jof-1267055-supplementary/TableS3_ Transcription data.xlsx]

## Sheet: Overview
Supplementary Table S3 Transcription data of selected gene groups
Part 1: Genes involved in oxidative stress response .
Part 2: Genes involved in antioxidative defence.
Part 3: Genes involved in selected metabolic pathways.
Part 4: Genes of ergosterol and fatty acid metabolism.
Part 5: Genes involved in iron, zinc and copper metabolism.
Part 6: Selected genes involved in branched-chain amino acid biosynthetic process, glutamate degradation and drug resistance
The systematic names, gene names and the features (putative molecular function or biological process) of the genes are given according to the Candida Genome Database (http://www.candidagenome.org).
Up- and down-regulated gene were defined as differentially expressed genes with < 0.05 corrected p value. RNA-Seq data are presented as log2(FC) values, where FC is “fold change”.
Up- and down-regulated genes are marked with red and blue colour.
"The response of oxidative stress" genes (GOID: 0006979) collected from Gene Ontology Term Finder (http://www.candidagenome.org/cgi-bin/GO/goTermFinder).
Results of gene enrichment analysis (Fisher’s exact test) are also enclosed to the parts 1, 3, 4, 5 and 6.

## Sheet: Part1
Supplementary Table 3 Transcription data of selected gene groups
Part 1: Genes involved in oxidative stress response (GOID: 0006979).
Gene ID	Gene name	Feature	QMY23+MSB vs QMY23	QMY23+BM+MSB vs QMY23	cappz1+MSB vs cappz1	cappz1+BM+MSB vs cappz1	cappz1 vs QMY23	cappz1+MSB vs QMY23+MSB	cappz1+BM+MSB vs QMY23+BM+MSB
Catalases, SODs, peroxidases, reductases, glutaredoxin, thioredoxin
C1_06810W	CAT1	Catalase; resistance to oxidative stress, neutrophils, peroxide; role in virulence; regulated by iron, ciclopirox, fluconazole, carbon source, pH, Rim101, Ssn6, Hog1, Hap43, Sfu1, Sef1, farnesol, core stress response; Spider biofilm induced	1.1931	1.8255	2.90278	2.83421	-0.203322	1.50635	0.805386
C3_02480C	CCP1	Cytochrome-c peroxidase N terminus; Rim101, alkaline pH repressed; induced in low iron or by macrophage interaction; oxygen-induced activity; regulated by Sef1, Sfu1, and Hap43; Spider biofilm induced; rat catheter biofilm repressed	1.24717	2.0406	2.71245	2.78948	-0.0280247	1.43726	0.720859
C1_07180W	CCS1	Copper chaperone involved in activation and protection of superoxide dismutase Sod1p	0.328584	0.457478	0.728479	0.937114	0.130657	0.530552	0.610293
C4_02320C	SOD1	Cytosolic copper- and zinc-containing superoxide dismutase; role in protection from oxidative stress; required for full virulence; alkaline induced by Rim101; induced by human blood; rat catheter, flow model and Spider biofilm repressed	0.416349	0.664827	0.8131	1.12155	-0.335756	0.0609949	0.12097
C1_01520C	SOD2	Mitochondrial Mn-containing superoxide dismutase; protection against oxidative stress; homotetramer active; N-terminal 34 amino acids removed on mitochondrial import; H2O2-induced via Cap1p; Hap43p-, alkaline-downregulated, farnesol-induced	-0.00408722	0.0409574	-0.0599192	0.415304	0.346891	0.291059	0.721237
C7_00110W	SOD3	Cytosolic manganese-containing superoxide dismutase; protects against oxidative stress; repressed by ciclopirox olamine, induced during stationary phase when SOD1 expression is low; Hap43-repressed; Spider and flow model biofilm induced	-0.953583	-0.635789	-1.75269	-1.50959	1.03428	0.235171	0.160476
C2_00660C	SOD4	Cu-containing superoxide dismutase; role in response to host innate immune ROS; regulated on white-opaque switch; ciclopirox olamine induced; caspofungin repressed; SOD1,4,5,6 gene family; yeast-associated; Spider biofilm induced	-0.391526	-0.515072	-0.440912	-0.399569	0.555542	0.506156	0.671045
C2_00680C	SOD5	Cu-containing superoxide dismutase; protects against oxidative stress; induced by neutrophils, hyphal growth, caspofungin, osmotic/oxidative stress; oralpharyngeal candidiasis induced; rat catheter and Spider biofilm induced	-0.786237	-1.13062	-1.20134	-1.5588	-0.407189	-0.822295	-0.835378
C2_00240C	SOD6	Copper-containing superoxide dismutase; gene family includes SOD1, SOD4, SOD5, and SOD6; gene may contain an intron; Hap43-repressed; flow model and rat catheter biofilm induced	0.0803281	0.0995206	0.70655	1.26284	-0.00438785	0.621834	1.15893
C1_07880C	GCS1	Gamma-glutamylcysteine synthetase; glutathione synthesis, required for virulence;induced in low iron, H2O2, Cd, or presence of human neutrophils; possibly adherence-induced; Spider and F-12/CO2 biofilm induced	0.211732	0.264105	0.250694	0.174846	0.626211	0.665173	0.536952
C5_01520C	GLR1	Glutathione reductase; upregulated by human neutrophils; oxidative stress-induced regulation via Cap1p; overexpression correlates with multidrug resistance in a cap1 mutant, farnesol induced; stationary phase enriched protein	0.674064	1.09667	1.2284	1.09982	0.130651	0.68499	0.133795
C6_00850W		Putative glutathione peroxidase; induced by peroxide, exposure to neutrophils and macrophage blood fractions; repressed during infection of macrophages; Spider biofilm induced; flow model biofilm repressed	1.16899	2.16345	2.69955	2.88941	0.119379	1.64994	0.845335
C6_00840W	GPX2	Similar to glutathione peroxidase; induced in high iron; alkaline induced by Rim101; induced by alpha factor or interaction with macrophage; regulated by Efg1; caspofungin repressed; Spider biofilm induced	0.833475	1.40419	0.0909283	-0.170093	-0.211119	-0.953665	-1.7854
C1_07350C	GPX3	Putative glutathione peroxidase involved in Cap1p-dependent oxidative stress response, required for Cap1p oxidation in response to H2O2; planktonic growth-induced	0.467601	0.735522	0.393382	0.51971	-0.0955039	-0.169723	-0.311316
C1_07630W		Ortholog(s) have glutathione disulfide oxidoreductase activity and role in [2Fe-2S] cluster assembly, cellular response to oxidative stress, protein maturation by [2Fe-2S] cluster transfer, response to osmotic stress	0.2603	0.573914	-0.32622	-0.603574	0.387866	-0.198654	-0.789622
C4_02990C	GST2	Glutathione S transferase; induced by benomyl and in populations of cells exposed to fluconazole over multiple generations; regulated by Nrg1, Tup1; induced by nitric oxide; stationary phase enriched; Spider biofilm induced	1.38014	1.97476	1.64412	2.23014	0.68385	0.947833	0.939225
C3_00480C	DOT5	Putative nuclear thiol peroxidase; alkaline downregulated; sumoylation target; Spider and flow model biofilm induced	0.19984	0.161126	0.54638	1.12124	0.0876309	0.434172	1.04774
C4_02710C	GRX3	Putative glutaredoxin; flucytosine induced; regulated by Gcn4p; repressed in response to amino acid starvation (3-aminotriazole treatment)	-0.139596	0.093966	-0.331202	-0.455561	0.0262832	-0.165322	-0.523244
C5_01560C		Putative glutaredoxin; induced by nitric oxide; Spider biofilm induced	-0.0755532	-0.0522743	-0.376665	-0.24885	0.143597	-0.157516	-0.0529789
C1_00490C	TTR1	Putative glutaredoxin; described as a glutathione reductase; induced by human neutrophils and benomyl treatment; alkaline repressed; regulated by Gcn2 and Gcn4; required for virulence in mouse model; Spider biofilm induced	0.955516	1.37558	1.04072	1.32618	0.291085	0.376292	0.241679
C5_02710W	TRR1	Thioredoxin reductase; regulated by Tsa1/Tsa1B, Hap43; induced by nitric oxide, peroxide; oxidative stress-induce via Cap1; induced by human neutrophils; stationary phase enriched protein	1.99303	2.86413	2.9411	2.8613	0.192764	1.14084	0.189929
CR_10350C	TRX1	Thioredoxin; involved in response to reactive oxygen species; biofilm, benomyl, flucytosine, peroxide, Hap43 induced; amphotericin B, caspofungin repressed; induced by human neutrophils; macrophage-repressed gene	0.936411	1.39998	1.73485	1.7953	-0.0747103	0.723731	0.32061
C7_02810W	PRX1	Thioredoxin peroxidase; transcriptionally induced by interaction with macrophage; fluconazole induced; Fkh2p-downregulated; caspofungin repressed; protein present in exponential and stationary growth phase yeast cultures	-0.31695	-0.551968	-0.412176	0.117177	-0.258297	-0.353523	0.410849
C3_06180C	TSA1	TSA/alkyl hydroperoxide peroxidase C (AhPC) family protein; similar to thiol-dependent peroxidases of oxidative stress signaling; antigenic; hyphal surface, nucleus; yeast-form nucleus, cytoplasm; biofilm, phagocytosis, peroxide induced	1.10166	1.66375	1.84498	1.88617	-0.168542	0.574779	0.0538741
C3_06330W	TSA1B	Putative peroxidase; orf19.7398.1 is contig-truncated fragment of gene identical to TSA1; Tsa1p and Tsa1Bp role under oxidative/reductive stress, hyphal cell wall formation; in hyphal nucleus, cell wall; yeast-form nucleus, cytoplasm	1.10422	1.67215	1.84815	1.88953	-0.166867	0.577067	0.050514
C6_00860W	GPX1	Putative thiol peroxidase; rat catheter and Spider biofilm induced	-0.0802353	-0.0252078	-0.443943	-0.316333	0.328549	-0.0351592	0.0374234
C4_02410C	AHP1	Alkyl hydroperoxide reductase; immunogenic; fluconazole-induced; amphotericin B, caspofungin, alkaline repressed; core stress response induced; Ssk1/Nrg1/Tup1/Ssn6/Hog1 regulated; flow model biofilm induced; rat catheter biofilm repressed	0.600684	0.740697	1.42261	1.84679	-0.709754	0.112175	0.396341
C2_05060C		Putative sulfiredoxin; regulated by Tsa1, Tsa1B in minimal media at 37 degrees C; flow model biofilm induced; Spider biofilm induced	2.35321	3.60513	3.45869	3.27831	0.381346	1.48683	0.0545278
Quinone-dependent antioxidant system
CR_05380C	YCP4	Flavodoxin-like protein involved in oxidative stress protection and virulence; flow model, rat catheter and Spider biofilm repressed	0.648017	0.788628	0.882785	1.18773	0.19216	0.426928	0.59126
C2_06870C	PST1	Flavodoxin-like protein involved in oxidative stress protection and virulence; putative 1,4-benzoquinone reductase; hyphal-induced; regulated by Cyr1, Ras1, Efg1, Nrg1, Rfg1, Tup1; Hap43-induced; Spider biofilm induced	0.217763	0.0509772	0.236521	0.577971	0.573173	0.591932	1.10017
C2_08640C	PST2	Flavodoxin-like protein involved in oxidative stress protection and virulence; putative NADH:quinone oxidoreductase; similar to 1,4-benzoquinone reductase; induced by benomyl, oxidative stress via Cap1; fungal-specific	0.755125	0.838848	0.763576	1.64335	0.915545	0.923996	1.72005
CR_05390W	PST3	Flavodoxin-like protein involved in oxidative stress protection and virulence; YNB biofilm induced; stationary phase enriched protein; rat catheter and Spider biofilm repressed	1.02028	1.40237	1.60325	2.612	0.135032	0.718002	1.34466
C2_07070W		Protein similar to quinone oxidoreductases; induced by benomyl treatment, nitric oxide; oxidative stress-induced via Cap1; stationary-phase enriched protein; Spider biofilm induced	2.05165	2.59781	2.64483	3.35825	0.286099	0.879275	1.04654
Detoxification
C3_05220W	CDR1	Multidrug transporter of ABC superfamily; transports phospholipids in an in-to-out direction; induced by beta-estradiol, progesterone, corticosteroid, or cholesterol; Spider biofilm induced	0.288971	0.440907	0.4633	0.729094	-0.188819	-0.0144899	0.099368
C3_04890W	CDR2	Multidrug transporter, ATP-binding cassette (ABC) superfamily; transports phospholipids, in-to-out direction; overexpressed in azole-resistant isolates; repressed in young biofilms	0.235411	0.335254	0.426418	0.663064	-0.215296	-0.0242884	0.112514
C6_03170C	MDR1	Plasma membrane MDR/MFS multidrug efflux pump; methotrexate is preferred substrate; overexpression in drug-resistant clinical isolates confers fluconazole resistance; repressed in young biofilms; rat catheter biofilm induced	2.25696	2.85155	2.70121	2.65715	0.966182	1.41044	0.771786
C5_01840C	TAC1	Zn(2)-Cys(6) transcriptional activator of drug-responsive genes (CDR1 and CDR2); binds DRE element; gene in zinc cluster region near MTL locus; resequencing indicates that TAC1 spans orf19.3188 and orf19.3189; Spider biofilm induced	0.0268846	0.0947486	-0.163923	-0.159773	0.347975	0.157167	0.0934535
C5_01850C	ZNC1	Zn(2)-Cys(6) transcription factor; regulated by Gcn2 and Gcn4; gene located in zinc cluster region of Chromosome 5, near the MTL locus; required for yeast cell adherence to silicone substrate; Spider biofilm induced	0.04665	0.0902039	0.202335	0.372971	0.21208	0.367765	0.494847
Chaperon and related proteins
CR_06950C	ATX1	Putative cytosolic copper metallochaperone; flucytosine induced; Ssr1-repressed; rat catheter biofilm induced	0.709649	0.888539	1.23134	1.43703	0.236295	0.757988	0.784788
CR_04200W	YDJ1	Putative type I HSP40 co-chaperone; heavy metal (cadmium) stress-induced	-0.190008	-0.233344	-0.466672	-0.669966	-0.170675	-0.447339	-0.607297
C5_02110W		Putative heat shock protein; decreased expression in hyphae; transcription is increased in populations of cells exposed to fluconazole over multiple generations; overexpression increases resistance to farnesol and azoles	-0.520932	-0.823703	-0.802907	-0.571273	0.939563	0.657587	1.19199
C2_04010C	HSP21	Small heat shock protein; role in stress response and virulence; fluconazole-downregulated; induced in cyr1 or ras1 mutant; stationary phase enriched protein; detected in some, not all, biofilm extracts; Spider biofilm induced	0.476369	0.969766	0.0330661	0.49079	1.60435	1.16104	1.12537
CR_05720W	TPS1	Trehalose-6-phosphate synthase; role in hyphal growth and virulence in mouse systemic infection; induced in presence of human neutrophils; macrophage/pseudohyphal-repressed after 16h; stationary phase enriched protein; Hap43-repressed	0.646886	0.77811	0.977379	1.29323	-0.000990743	0.329502	0.514127
C1_03380W	TPS2	Trehalose-6-phosphate (Tre6P) phosphatase; mutant heat sensitive, accumulates Tre6P, decreased mouse virulence; possible drug target; 2 conserved phospohydrolase motifs; no mammalian homolog; Hap43-repressed; flow model biofilm induced	0.430556	0.313276	1.20786	1.58744	-0.378098	0.399201	0.896065
Regulation
C3_02220W	CAP1	AP-1 bZIP transcription factor; apoptotic, oxidative stress response/resistance, multidrug resistance; nuclear in oxidative stress; complements S. cerevisiae yap1 mutant; oralpharyngeal candidasis-, human neutrophil, Spider biofilm induced	0.447583	0.615195	0.747133	0.75885	-0.134595	0.164955	0.00906026
C6_03580W	CCZ1	Protein involved in oxidative stress response and autophagy; mutants have fragmented mitochondria and attenuated virulence	0.00336216	0.161202	0.459956	0.338745	0.132965	0.589558	0.310508
C6_01070C	CIP1	Possible oxidoreductase; transcript induced by cadmium but not other heavy metals, heat shock, yeast-hypha switch, oxidative stress (via Cap1), or macrophage interaction; stationary phase enriched protein; Spider biofilm induced	3.42384	4.24458	4.65811	5.1973	0.363258	1.59753	1.31598
C2_07170C	AFT2	Putative Aft domain transcription factor; role in regulation of iron metabolism, oxidative stress, adhesion, hyphal growth, colony morphology, virulence; complements S. cerevisiae aft1 mutation; Spider biofilm induced	0.18102	0.278595	-0.000914647	-0.0899284	0.293954	0.112019	-0.0745696
C3_04550C	CMK1	Putative calcium/calmodulin-dependent protein kinase II; expression regulated upon white-opaque switching; biochemically purified Ca2+/CaM-dependent kinase is soluble, cytosolic, monomeric, and serine-autophosphorylated; Hap43p-repressed	0.0743052	-0.0231226	0.512864	0.757032	-0.168742	0.269816	0.611413
C2_10260C	CMK2	Putative calmodulin-dependent protein kinase; involved in cell wall integrity and oxidative stress response	0.112875	0.474342	0.190399	0.238991	0.191182	0.268706	-0.0441694
C4_01390W	HAP3	Predicted CCAAT-binding transcription factor that regulates respiration; Cap2-dependent induction in low iron; opaque specific, alkaline, ciclopirox olamine induced; regulated by Sef1, Sfu1, Hap43; Bcr1-regulated in RPMI a/a biofilms	-0.176918	0.170532	-0.338008	-0.560485	0.160447	-0.000642687	-0.570571
CR_04290W	HAP31	Putative CCAAT-binding transcription factor; regulates CYC1; required for resistance to rapamycin, copper; induced in high iron; repressed in low iron; Sef1, Sfu1, and Hap43 regulated; rat catheter and Spider biofilm induced	-0.106749	0.0684592	-0.61252	-0.387928	0.352798	-0.152972	-0.103589
C4_05110C	HAP41	Putative Hap4-like transcription factor; Hap43-repressed; not required for response to low iron; induced by Mnl1 under weak acid stress; Spider biofilm induced	-0.177963	-0.00320667	-0.00486092	0.152361	-0.0190587	0.154043	0.136509
C2_01700C	HAP42	Predicted transcription factor; possibly an essential gene, disruptants not obtained by UAU1 method	-0.129925	-0.164543	0.303729	0.381004	-0.118106	0.315548	0.427441
C1_11210C	HAP43	CCAAT-binding factor-dependent transcription factor; repressor; also called CAP2; required for low iron response; similar to bZIP transcription factor AP-1; repressed by Sfu1; ciclopirox olamine induced; rat catheter, Spider biofilm induced	-0.256686	-0.22737	-0.315575	-0.316262	0.278002	0.219113	0.18911
C5_00940C	HAP5	Component of CCAAT-binding transcription factor; roles in filamentous growth, low-iron induction of FRP1; regulates genes involved in respiratory growth; functional homolog of S. cerevisiae Hap5p; Cap1p-dependent expression in low iron	-0.273418	-0.391142	-0.196612	-0.25373	-0.258126	-0.18132	-0.120714
C2_03330C	HOG1	MAP kinase of osmotic-, heavy metal-, and core stress response; role in regulation of glycerol, D-arabitol in response to stress; phosphorylated in response to H2O2 (Ssk1-dependent) or NaCl; mutant induces protective mouse immune response	-0.0622918	-0.217835	0.0613061	0.116339	-0.114277	0.00932111	0.219897
C1_08940C	MSN4	Zinc finger transcription factor; similar to S. cerevisiae Msn4, but not a significant stress response regulator in C. albicans; partly complements STRE-activation defect of S. cerevisiae msn2 msn4 double mutant; flow model biofilm induced	0.228912	0.344059	0.866335	0.972504	-0.211108	0.426315	0.417336
C7_00740W	RIM15	Ortholog(s) have protein kinase activity, protein serine/threonine kinase activity	0.209627	0.350371	0.559254	0.60071	0.167192	0.516819	0.417531
C1_13960W	YBP1	Protein involved in response to oxidative stress, binds and stabilizes Cap1p transcription factor in response to H2O2; essential for macrophage killing	0.315	0.689687	-0.0145597	-0.12393	-0.141995	-0.471554	-0.955612
C2_03770C	STE11	Protein similar to S. cerevisiae Ste11p; mutants are sensitive to growth on H2O2 medium	0.259166	0.274953	0.466305	0.715459	0.0549545	0.262094	0.495461
C2_03940C	SCH9	Protein kinase; involved in growth control, cell size, resistance to rapamycin, cations, chlamydospore formation, filamentous growth under some conditions, and virulence; prevents hyphal growth in hypoxia at high CO2; Spider biofilm induced	-0.113638	-0.16716	-0.601194	-0.627126	0.209469	-0.278086	-0.250496
C7_03220C	ZCF29	Zn(II)2Cys6 transcription factor; mutants sensitive to caffeine, menadione, beauvericin;resistant to fenpropimorph; Hap43-repressed; mutants have decreased CFU in mouse kidneys and defects in filamentous growth; Spider biofilm induced	-0.0456557	-0.119616	0.292299	0.330765	0.178371	0.516326	0.628752
CR_00120C	MKC1	MAP kinase; role in biofilm formation, contact-induced invasive filamentation, systemic virulence in mouse, cell wall structure/maintenance, caspofungin response; phosphorylated on surface contact, membrane perturbation, or cell wall stress	-0.264553	-0.424482	-0.0307655	0.2121	-0.447799	-0.214012	0.188783
C2_07130C	RCK2	Predicted MAP kinase-activated protein kinase, similar to S. cerevisiae serine/threonine protein kinase Rck2p; induced by osmotic stress via Hog1p; macrophage/pseudohyphal-repressed; mutants are sensitive to rapamycin	-0.14387	-0.282269	-0.0133123	0.0869919	0.0139144	0.144472	0.383176
C3_04860W	SFP1	C2H2 transcription factor involved in regulation of biofilm formation; regulates carbon source-dependent stress response; rat catheter biofilm induced	-0.147975	-0.340787	-0.136797	-0.13413	-0.0506083	-0.0394308	0.156049
C1_04380W	SIT4	Serine/threonine protein phosphatase catalytic subunit; has a role in cell wall maintenance, hyphal growth, and virulence in a mouse systemic infection model	-0.0322285	-0.082938	0.0373913	0.0573191	0.0877754	0.157395	0.228033
C4_05030C	SSK2	MAP kinase kinase kinase (MAPKKK); regulates Hog1 activation and signaling; repressed by ciclopirox olamine	-0.102572	-0.24724	-0.197835	-0.138785	-0.0146321	-0.109895	0.0938226
C1_01200W	STB5	Putative transcription factor with zinc cluster DNA-binding motif; has similarity to S. cerevisiae Stb5p; Hap43p-repressed gene	0.213294	0.524124	0.36773	0.412346	0.0598013	0.214238	-0.0519769
C1_13930W	SSK1	Response regulator of two-component system; role in oxidative stress response, cell wall biosynthesis, virulence, hyphal growth on solid media; expressed in hyphae and yeast; peroxisomal targeting sequence (PTS1); Spider biofilm induced	-0.150326	-0.156448	-0.261008	-0.117554	0.19119	0.0805074	0.230084
C5_00240W	SKN7	Putative homolog of S. cerevisiae Skn7p, which is predicted to be a response regulator protein in a phosphorelay signal transduction pathway; required for normal hydrogen peroxide resistance	-0.117158	-0.208047	-0.0878435	-0.0317265	0.134123	0.163437	0.310443
C2_04260W	SSN3	Putative cyclin-dependent protein kinase; mutants are sensitive to growth on H2O2 medium	-0.0981767	-0.13341	0.0459148	-0.007091	0.023608	0.167699	0.149927
C2_02100W	SNF2	Protein involved in transcriptional regulation; ortholog of S. cerevisiae Snf2p, which is the catalytic subunit of the SWI/SNF chromatin remodeling complex; interacts with Swi1p; SWI/SNF complex is essential for hyphal growth and virulence	-0.0591885	-0.0337011	0.1797	0.155692	-0.11285	0.126039	0.0765431
C1_09140C	SSU81	Predicted adaptor protein involved in activation of MAP kinase-dependent signaling pathways; links response to oxidative stress to morphogenesis and cell wall biosynthesis; caspofungin repressed	-0.0640133	-0.275132	-0.124909	-0.162054	-0.172225	-0.233121	-0.0591473
CR_06420W	PPZ1	Protein phosphatase Z; fungal-specific type 1 family serine/threonine protein phosphatase involved in cation homeostasis and cell wall integrity	0.0874348	0.0173429	-0.740974	0.19164	-10.8834	-11.7118	-10.7091
C2_04980C	CKA2	Catalytic alpha-subunit of protein kinase CK2; interaction with calcineurin pathway affects fluconazole sensitivity; synthetically lethal with CKA1; attenuated virulence in a mouse oropharyngeal candidiasis but not in a systemic mouse model	-0.185941	-0.196133	-0.451402	-0.690085	0.316237	0.0507754	-0.177715
C2_10190C	OCA1	Putative protein phosphatase of the PTP family (tyrosine-specific); ortholog of S. cerevisiae Oca1; mutant is viable; mutant shows virulence defect	0.00953191	0.230346	-0.175708	-0.361099	0.24591	0.0606698	-0.345535
C2_10210C	RAS1	RAS signal transduction GTPase; regulates cAMP and MAP kinase pathways; role in hyphal induction, virulence, apoptosis, heat-shock sensitivity; nonessential; plasma membrane-localized; complements viability of S. cerevisiae ras1 ras2 mutant	-0.058825	0.0212622	-0.0666854	-0.110501	0.156601	0.148741	0.0248381
Other functions
C3_07340W	GCY1	Aldo/keto reductase; mutation confers hypersensitivity to toxic ergosterol analog; farnesol-repressed; stationary phase enriched protein; flow model biofilm induced; Spider biofilm repressed	0.425302	0.507499	0.634309	0.865908	0.135819	0.344826	0.494228
CR_00860C	TMA19	Cell wall protein, ortholog of S. cerevisiae Tma19p (Ykl065cp)	-0.103801	-0.113884	-0.366265	-0.366945	-0.274419	-0.536882	-0.52748
C6_03710W	ALS9	ALS family cell-surface glycoprotein; expressed during infection of human epithelial cells; confers laminin adhesion to S. cerevisiae; highly variable; putative GPI-anchor; Hap43-repressed	0.338066	0.056371	0.175338	0.276181	-0.00505299	-0.167781	0.214757
C2_03320W	CHK1	Histidine kinase; 2-component signaling, cell wall synthesis; hyphal growth defect; avirulent in mouse, not rat vaginal infection; phagocytosis rate increased; Spider biofilm induced; required for RPMI biofilm; Bcr1-induced in a/a biofilm	0.0711398	0.106537	0.129091	0.246392	0.0493751	0.107326	0.189231
C1_03330C		Ortholog(s) have phosphatidylinositol-3,5-bisphosphate binding, phosphatidylinositol-3-phosphate binding, phosphatidylinositol-4-phosphate binding activity	0.0642726	-0.171764	0.241814	0.434647	0.0991899	0.276732	0.705601
CR_08990C	SLP3	Plasma membrane protein implicated in stress response; similar to stomatin mechanoreception proteins; overexpression induces apoptotic-like cell death; absent from hyphal cells; induced by Rgt1; rat catheter and Spider biofilm induced	-0.14092	-0.552057	0.24492	0.442412	-0.383468	0.00237238	0.611001
C3_01630W	TFP1	Subunit of vacuolar H+-ATPase; stationary phase enriched protein; sumoylation target; Spider biofilm repressed	0.0376516	-0.0222678	0.0782136	0.0491186	0.0511294	0.0916914	0.122516
C1_11480W	PHO84	High-affinity phosphate transporter; transcript regulated by white-opaque switch; Hog1, ciclopirox olamine or alkaline induced; caspofungin, stress repressed; required for normal TORC1 function	-0.397637	-0.0190694	0.0363132	-0.0796873	0.0147147	0.448665	-0.0459032
CR_09300C	SCO1	Putative copper transporter; Hap43p-repressed gene	0.0853813	0.00617587	-0.136924	0.155838	0.172608	-0.0496971	0.322271
C7_02490W	PEX1	Peroxisomal ATPase involved in import of peroxisomal matrix proteins; involved in oxidative stress tolerance	-0.0417364	-0.0277853	0.543715	0.574357	0.157261	0.742713	0.759403
C4_06430C		Ortholog(s) have role in cellular response to oxidative stress, protein import into peroxisome matrix, protein quality control for misfolded or incompletely synthesized proteins and mitochondrial inner membrane localization	-0.188301	-0.0776443	0.0952321	0.0343637	0.00122776	0.284761	0.113236
C1_04080W	MAD2	Protein required for the spindle assembly checkpoint of the cell cycle; necessary for survival in host cell macrophages and for virulence in a mouse model of systemic candidiasis	0.0483353	0.183209	-0.0834493	-0.0302798	-0.0462546	-0.178039	-0.259743
CR_08960C	MPS1	Monopolar spindle protein, putative spindle assembly checkpoint kinase; essential for growth; involved in oxidative stress response; periodic mRNA expression, peak at cell-cycle S/G2 phase	-0.332751	-0.419612	-0.274606	-0.36842	-0.473628	-0.415482	-0.422436
C2_05860C		Putative Xbp1 transcriptional repressor; binds to cyclin gene promoters in S. cerevisiae; Hap43-repressed; possibly essential, disruptants not obtained by UAU1 method	0.062318	-0.0541772	0.159684	0.386742	0.458715	0.556081	0.899634
C6_02730W	SAC6	Fimbrin; actin filament bundling protein; involved in hyphal growth, oxidative stress response and virulence; transcript regulated by Nrg1 and Mig1; protein level decreases in stationary phase	0.0971513	-0.0570306	0.15714	0.246938	-0.0106377	0.0493513	0.293331
C5_05280C	SDH4	Succinate dehydrogenase, membrane subunit; induced in high iron	-0.238001	-0.298314	-0.534854	-0.574729	-0.333004	-0.629857	-0.609418
C3_01300C	NCE103	Carbonic anhydrase; converts of CO2 to bicarbonate; essential for virulence in host niches with limited CO2, normal white-opaque switch; Mnl1-induced in weak acid stress; Hap43-induced gene; F-12/CO2, rat catheter, Spider biofilm induced	0.144056	0.279071	0.171102	0.147999	0.288789	0.315835	0.157718
C4_04640C	GOA1	Protein required for respiratory growth, resistance to oxidants, chlamydospore formation, hyphal growth under some conditions, and virulence; relocalizes from the cytoplasm to the mitochondrion during oxidative or osmotic stress	-0.0971106	0.0981876	-0.103901	-0.219788	0.105099	0.0983094	-0.212876
C2_00140W	NDT80	Ortholog of Ndt80; meiosis-specific transcription factor; activator of CDR1 induction by antifungal drugs; required for wild-type drug resistance and for Spider biofilm formation; transcript induced by antifungal drug treatment	-0.439073	-0.727231	-0.993895	-1.12291	-0.0773042	-0.632126	-0.472988
C2_08100W		Mitochondrial apoptosis-inducing factor; induced by nitric oxide; Spider biofilm induced; rat catheter biofilm repressed	0.495863	0.873409	0.891432	1.26515	0.297131	0.6927	0.688876
CR_03010C	ERV1	Predicted component of the mitochondrial intermembrane space (IMS), involved in protein import into mitochondrial intermembrane space	-0.0194061	0.266755	0.193811	0.481317	0.0332187	0.246435	0.24778
C3_07010W	POS5	Protein similar to S. cerevisiae Pos5p, a mitochondrial NADH kinase involved in the oxidative stress response; planktonic growth-induced gene; likely to be essential for growth, based on an insertional mutagenesis strategy	0.111563	0.143825	0.487683	0.534862	0.113267	0.489387	0.504304
CR_07770C	PTC6	Mitochondrial protein phosphatase of the Type 2C-related family (serine/threonine-specific), functional homolog of S. cerevisiae Ptc6p; mutant shows virulence defect	-0.00658008	-0.0835948	0.254826	0.37369	0.174192	0.435599	0.631477
C1_11880W		Ortholog(s) have structural constituent of ribosome activity and mitochondrial large ribosomal subunit localization	-0.147831	-0.247938	-0.706992	-0.861264	0.217342	-0.341819	-0.395984
C3_01850W		Ortholog(s) have structural constituent of ribosome activity and mitochondrial small ribosomal subunit localization	-0.0686399	0.160084	-0.678172	-1.05894	0.246782	-0.362751	-0.972242
C5_04530W		Putative mitochondrial ribosomal protein of the small subunit; mutation confers hypersensitivity to 5-fluorocytosine (5-FC), 5-fluorouracil (5-FU), and tubercidin (7-deazaadenosine)	-0.090635	-0.0593062	-0.711132	-1.04891	0.333325	-0.287172	-0.656276
CR_08700C	ARF1	Golgi-localized ADP-ribosylation factor involved in regulation of the ER-mitochondria encounter structure (ERMES); one of several C. albicans ADP-ribosylation factors; N-myristoylprotein; substrate of Nmt1; Spider biofilm induced	0.224552	-0.0707464	0.409435	0.74918	0.00610908	0.190992	0.826035
CR_09790W	ALO1	D-Arabinono-1,4-lactone oxidase involved in biosynthesis of dehydro-D-arabinono-1,4-lactone, which has a protective role against oxidative damage; plasma membrane-localized;required for full virulence in a mouse model of systemic infection	0.219403	0.213542	0.196969	0.292284	0.0466512	0.024217	0.125393
C3_02610C	GLX3	Glutathione-independent glyoxalase; binds human immunoglobulin E; alkaline, fluconazole, Hog1 repressed; hypoxia, oxidative stress via Cap1, Hap43 induced; stationary-phase enriched; rat catheter, Spider biofilm induced	1.34507	1.47255	1.1999	1.34949	1.06026	0.91509	0.937199
C1_13860C	GND1	6-phosphogluconate dehydrogenase; soluble in hyphae; farnesol, macrophage-induced protein; antigenic in mice; dual localization to cytosol and peroxisomes depends on alternative splicing; rat catheter and Spider biofilm repressed	0.118434	0.213196	0.431167	0.680894	-0.243161	0.0695724	0.224537
C1_08980C	ZWF1	Glucose-6-phosphate dehydrogenase; antigenic in mice; activity induced by O2 or oxidizing agents H2O2, menadione, macrophage; caspofungin repressed; induced in core stress response; regulated by Gcn2, Gcn4; rat catheter biofilm repressed	0.637071	0.996408	1.0025	0.727006	0.322158	0.687584	0.0527562
C3_03470W		Succinate semialdehyde dehydrogenase; for utilization of gamma-aminobutyrate (GABA) as a nitrogen source; part of 4-aminobutyrate and glutamate degradation pathways; rat catheter biofilm induced	-0.597664	-0.726796	-0.659342	-0.875184	0.207548	0.145871	0.0591606
C1_02150W	GAL10	UDP-glucose 4-epimerase; galactose utilization; mutant has cell wall defects and increased filamentation; GlcNAc-, fluconazole- and ketoconazole-induced; stationary phase enriched protein; rat catheter and flow model biofilm induced	-0.162302	0.197167	0.224699	0.429631	0.151802	0.538803	0.384266
C7_03350C		Putative aldose reductase; protein level decreases in stationary phase cultures; Spider biofilm repressed	0.379008	0.526201	0.532278	0.638138	0.385034	0.538303	0.496971
C3_06860C		Putative xylose and arabinose reductase; flow model biofilm induced; Spider biofilm repressed	0.481364	0.66251	0.525681	0.659269	-0.139037	-0.0947203	-0.142278
C5_02930C	GRE3	Putative D-xylose reductase; antigenic in murine systemic infection; soluble protein in hyphae; induced by farnesol, macrophage interaction and by Mnl1 under weak acid stress; stationary-phase enriched protein; Spider biofilm induced	0.125836	-0.139931	0.54375	0.565917	-0.152781	0.265133	0.553067
C6_02040W	MCR1	NADH-cytochrome-b5 reductase; soluble in hyphae; alkaline downregulated; farnesol, ketoconazole or flucytosine induced; protein present in exponential and stationary growth phase yeast; YNB biofilm induced; rat catheter biofilm repressed	0.512903	0.733586	0.346166	0.65554	0.180112	0.0133753	0.102066
C1_11660W	GAD1	Putative glutamate decarboxylase; alkaline, macrophage-downregulated gene; amphotericin B induced; induced by Mnl1 under weak acid stress; stationary phase enriched protein; rat catheter biofilm repressed	0.101552	0.0300215	0.176454	0.162048	0.0513371	0.126239	0.183364
CR_10250C	FDH3	Glutathione-dependent formaldehyde dehydrogenase; glycine catabolism; repressed by Efg1 in yeast, not hyphal growth conditions; induced by Mnl1 under weak acid stress; Spider biofilm repressed	-0.0809999	-0.247049	0.380571	0.267604	-0.491515	-0.0299439	0.0231387
C2_00960C	MXR1	Putative methionine sulfoxide reductase; Plc1-regulated; induced by human neutrophils, flucytosine; macrophage regulated (gene induced, protein decreased); possibly adherence-induced; Spider biofilm induced	0.245402	0.205655	0.0262872	0.244708	0.0823322	-0.136783	0.121385
C6_02800W		Ortholog(s) have methionine-R-sulfoxide reductase activity and role in cellular response to oxidative stress	0.133637	0.223155	0.113325	0.291267	-0.228323	-0.248635	-0.16021
C1_01040W		Ortholog(s) have peptide-methionine (R)-S-oxide reductase activity, role in cellular response to oxidative stress and mitochondrion localization	0.129836	0.0991371	0.221386	0.620871	-0.0331161	0.0584345	0.488618
C4_00180W	ECM7	Protein involved in control of calcium homeostasis and oxidative stress response; mutants show defects in hyphal growth	0.019636	-0.132214	-0.00960415	0.152835	0.0186492	-0.010591	0.303698
C4_04340C	YFH1	Frataxin; may be required for iron storage or delivery; role in oxidative stress resistance; transcript regulated by Nrg1, repressed if iron absent induced by macrophage interaction; Hap43-repressed gene	0.172701	0.2238	0.0261449	0.130354	-0.0991762	-0.245732	-0.192622
CR_07790C	YHB1	Nitric oxide dioxygenase; acts in nitric oxide scavenging/detoxification; role in virulence in mouse; transcript activated by NO, macrophage interaction; Hap43, hypha repressed; mRNA binds She3	0.0796626	0.524042	0.588926	0.589196	1.11699	1.62626	1.18215
C5_00810C		Has domain(s) with predicted heme binding, peroxidase activity and role in oxidation-reduction process, response to oxidative stress	0.349572	0.841585	0.727556	1.06899	0.4484	0.826383	0.675808
C1_00340W	HBR1	Essential protein involved in regulation of MTL gene expression; hemoglobin-regulated inhibitor of white-opaque switching, may affect survival in host; activator of MTLalpha1 and MTLalpha2; transcript activated by hemoglobin	-0.285192	-0.386292	-0.666196	-0.772719	0.038314	-0.34269	-0.348113
C1_00350C	HMX1	Heme oxygenase; utilization of hemin iron; transcript induced by heat, low iron, or hemin; repressed by Efg1; induced by low iron; upregulated by Rim101 at pH 8; Hap43-induced; Spider and flow model biofilm induced	-0.236478	-0.31023	-0.907333	-0.46832	0.0915771	-0.579277	-0.0665134
C1_04670W	HAT1	Hat1-Hat2 histone acetyltransferase complex subunit; involved in DNA damage repair and morphogenesis; mutations cause constitutive pseudohyphal growth, white to opaque switch, caspofungin sensitivity; rat catheter, Spider biofilm repressed	0.064931	0.0300424	-0.246147	-0.353326	-0.0213766	-0.332455	-0.404745
C6_04540C	HAT2	Putative Hat1-Hat2 histone acetyltransferase complex subunit; role in DNA damage repair and morphogenesis; mutations cause constitutive pseudohyphal growth, caspofungin sensitivity; rat catheter and Spider biofilm repressed	-0.113629	-0.330911	0.112574	0.167203	-0.402498	-0.176295	0.0956155
C1_05270C		Ortholog(s) have recombinase activity, single-stranded DNA binding, structural constituent of ribosome activity	-0.183744	-0.388582	-0.625192	-0.684513	0.172333	-0.269115	-0.123598
C1_11160C		Ortholog(s) have protein tag activity, role in cell budding, cellular response to oxidative stress, invasive growth in response to glucose limitation, protein urmylation, tRNA wobble position uridine thiolation and cytosol localization	0.0836558	-0.0281138	-0.75022	-0.808566	0.0389514	-0.794924	-0.741501
C4_05740C		Ortholog(s) have DNA binding, ubiquitin-protein transferase activity and role in histone catabolic process, histone ubiquitination, regulation of transcription from RNA polymerase II promoter in response to oxidative stress	-0.112675	-0.218151	-0.112579	-0.0646943	0.0790725	0.0791685	0.232529
CR_01550C		Ortholog(s) have 3'-5'-exodeoxyribonuclease activity, endonuclease activity and role in apoptotic DNA fragmentation, cellular response to oxidative stress	-0.0944522	0.0483145	-0.448404	-0.574999	-0.0972976	-0.45125	-0.720611
CR_04300W		Ortholog(s) have tRNA (cytosine-5-)-methyltransferase activity, tRNA binding activity, role in cellular response to hydrogen peroxide, tRNA wobble base cytosine methylation and nucleus localization	-0.340094	-0.39635	-0.602044	-0.585202	0.0990321	-0.162917	-0.0898198
C3_02000W	RAD50	Putative DNA double-strand break repair factor; involved in response to oxidative stress and drug resistance; flow model biofilm repressed	-0.0544994	0.0364199	0.151846	0.315488	-0.0200917	0.186254	0.258976
C6_00510C	RAD52	Required for homologous DNA recombination, repair of UV- or MMS-damaged DNA, telomere length, UV-induced LOH; constitutive expression, MMS-induced; weakly complements S. cerevisiae rad52 mutant; slow growth, increased white-to-opaque switch	-0.075292	-0.140111	-0.0492389	-0.0816817	-0.347081	-0.321028	-0.288653
C7_01340W	MRE11	Putative DNA double-strand break repair factor; involved in response to oxidative stress and drug resistance	-0.25078	-0.00323314	-0.216518	-0.183082	0.192587	0.226848	0.0127382
C5_00500W	NAM7	Putative role in nonsense-mediated mRNA decay; similar to S. cerevisiae Nam7p; gene induced by ciclopirox olamine treatment	-0.020462	0.0526458	-0.351435	-0.542806	-0.135762	-0.466735	-0.731214
C7_04140C		Ortholog(s) have unfolded protein binding activity	-0.228454	-0.137815	-0.829795	-0.981373	0.111714	-0.489626	-0.731844
C7_02480W		Ortholog(s) have unfolded protein binding activity, role in aerobic respiration, mitochondrial respiratory chain complex IV assembly, protein processing and mitochondrial inner membrane localization	0.00783956	0.151226	-0.156795	-0.106867	0.173554	0.00891914	-0.0845389
C1_10930C	UBA4	Putative ubiquitin activating protein; Hap43-repressed; induced by prostaglandins; clade-associated gene expression	0.223176	0.158096	0.046206	0.240069	0.00561358	-0.171357	0.0875864
CR_06530W		Ortholog(s) have role in hydrogen peroxide-mediated programmed cell death	-0.0651185	0.0573675	-0.137583	-0.288681	-0.180149	-0.252613	-0.526197
C2_00840W		Ortholog(s) have oxidoreductase activity, acting on NAD(P)H activity	-0.209779	-0.365987	-0.381992	-0.42751	-0.165208	-0.33742	-0.226732
C5_04420W		Ortholog(s) have role in cellular response to heat, cellular response to oxidative stress, chronological cell aging, negative regulation of autophagy of mitochondrion	0.148452	0.385738	0.376905	0.371369	0.107028	0.335481	0.0926586
C3_02540C	OXR1	Ortholog(s) have role in cellular response to oxidative stress and mitochondrion localization	0.28266	0.251918	0.100022	0.230819	0.302977	0.120339	0.281878
CR_05610C	SRR1	Two-component system response regulator; involved in stress response; Plc1-regulated; upregulated in cyr1 null mutant; flow model biofilm induced; Spider biofilm induced	-0.61274	-1.12922	-1.93146	-2.01677	0.266971	-1.05175	-0.620575
C1_00400W	SVF1	Putative survival factor; stationary phase enriched protein; fluconazole-induced; regulated by Gcn4p; repressed in response to amino acid starvation (3-AT treatment); fungal-specific (no human or murine homolog)	-0.0673192	-0.233625	-0.388208	-0.467175	-0.0734922	-0.394381	-0.307042
C1_09870W	HCM1	Protein with forkhead domain; similar to S. cerevisiae Hcm1p; Hap43p-induced gene	-0.236952	-0.440861	-0.899818	-1.03756	-0.534524	-1.19739	-1.13122
CR_02650C	DRE2	Putative cytosolic Fe-S protein assembly protein; a-specific transcript; regulated by Sef1, Sfu1, and Hap43; rat catheter and Spider biofilm induced	0.065764	0.902006	0.570747	0.375872	0.589711	1.09469	0.0635772
C2_06720W	GRE2	Putative reductase; Nrg1 and Tup1-regulated; benomyl- and hyphal-induced; macrophage/pseudohyphal-repressed; repressed by low iron; possibly involved in osmotic stress response; stationary phase enriched protein; Spider biofilm induced	0.850466	1.25093	1.41133	1.34207	0.362952	0.923815	0.454091
C2_09220W	DDR48	Immunogenic stress-associated protein; filamentation regulated; induced by benomyl/caspofungin/ketoconazole or in azole-resistant strain; Hog1, farnesol, alkaline repressed; stationary phase enriched; Spider, flow model biofilm induced	-0.181302	-0.193488	-0.218586	0.386834	0.937784	0.900501	1.51811
CR_10650W	LTV1	Putative GSE complex component; repressed by prostaglandins	-0.756718	-0.927875	-1.50324	-1.75456	-0.224328	-0.970848	-1.05102
C1_06730W	RAC1	G-protein of RAC subfamily; required for embedded filamentous growth, not for serum-induced hyphal growth; dynamic localization at plasma membrane and nucleus; similar to, but not interchangeable with, Cdc42p; lacks S. cerevisiae homolog	-0.008025	-0.122332	-0.0383204	-0.00138662	-0.0923135	-0.122609	0.0286314
C4_02030W	RFX2	Transcriptional repressor; regulator of filamentation, response to DNA damage, adhesion, virulence in murine mucosal, systemic infections; RFX domain; regulated by Nrg1, UV-induced; partially complements S. cerevisiae rfx1 mutant defects	-0.0410112	0.0963657	-0.0138309	0.202413	-0.018531	0.00864939	0.0875165

## Sheet: Part2
Supplementary Table 3 Transcription data of selected gene groups
Part 2: Genes involved in antioxidative defence.
Gene ID	Gene name	Feature	QMY23+MSB vs QMY23	QMY23+BM+MSB vs QMY23	cappz1+MSB vs cappz1	cappz1+BM+MSB vs cappz1	cappz1 vs QMY23	cappz1+MSB vs QMY23+MSB	cappz1+BM+MSB vs QMY23+BM+MSB
C1_06810W	CAT1	Catalase	1.1931	1.8255	2.90278	2.83421	-0.203322	1.50635	0.805386
C4_02320C	SOD1	Cytosolic copper- and zinc-containing superoxide dismutase	0.416349	0.664827	0.8131	1.12155	-0.335756	0.0609949	0.12097
C1_01520C	SOD2	Mitochondrial Mn-containing superoxide dismutase	-0.00408722	0.0409574	-0.0599192	0.415304	0.346891	0.291059	0.721237
C7_00110W	SOD3	Cytosolic manganese-containing superoxide dismutase	-0.953583	-0.635789	-1.75269	-1.50959	1.03428	0.235171	0.160476
C2_00660C	SOD4	Cu-containing superoxide dismutase	-0.391526	-0.515072	-0.440912	-0.399569	0.555542	0.506156	0.671045
C2_00680C	SOD5	Cu-containing superoxide dismutase	-0.786237	-1.13062	-1.20134	-1.5588	-0.407189	-0.822295	-0.835378
C2_00240C	SOD6	Copper-containing superoxide dismutase	0.0803281	0.0995206	0.70655	1.26284	-0.00438785	0.621834	1.15893
C7_03020C	DUG3	Putative glutamine amidotransferase	0.516016	0.591994	0.605874	0.797624	0.0327519	0.12261	0.238382
C1_05930C		Glutathione hydrolase complex	0.0218054	0.261672	0.0176944	-0.242704	0.155686	0.151575	-0.348691
CR_08370W	GSH2	Putative glutathione synthase	0.00888977	-0.288568	0.0150876	0.141554	-0.260185	-0.253987	0.169936
CR_10250C	FDH3	Glutathione-dependent formaldehyde dehydrogenase	-0.0809999	-0.247049	0.380571	0.267604	-0.491515	-0.0299439	0.0231387
C7_02330W	YCF1	Putative glutathione S-conjugate transporter;	0.313095	0.423876	0.740957	0.747695	0.376278	0.80414	0.700097
C4_02710C	GRX3	Putative glutaredoxin	-0.139596	0.093966	-0.331202	-0.455561	0.0262832	-0.165322	-0.523244
C1_00490C	TTR1	Putative glutaredoxin	0.955516	1.37558	1.04072	1.32618	0.291085	0.376292	0.241679
C1_07630W		Glutathione disulfide oxidoreductase activity	0.2603	0.573914	-0.32622	-0.603574	0.387866	-0.198654	-0.789622
C7_02080W		Glutathione disulfide oxidoreductase activity	0.378448	0.50674	-0.135997	-0.270713	0.38363	-0.130814	-0.393824
C1_00550W	CIS2	Glutathione hydrolase activity	0.0184667	-0.260495	-0.0684703	0.0832962	0.26207	0.175133	0.605862
C4_03540C	ECM38	Putative gamma-glutamyltransferas	-0.03489	-0.207899	0.674119	1.01457	-0.0181519	0.690858	1.20432
C6_00860W	GPX1	Glutathione peroxidase	-0.0802353	-0.0252078	-0.443943	-0.316333	0.328549	-0.0351592	0.0374234
C6_00840W	GPX2	Glutathione peroxidase	0.833475	1.40419	0.0909283	-0.170093	-0.211119	-0.953665	-1.7854
C1_07350C	GPX3	Glutathione peroxidase	0.467601	0.735522	0.393382	0.51971	-0.0955039	-0.169723	-0.311316
C3_03600C	GTT12	Glutathione peroxidas	0.459423	1.17704	1.42048	1.70059	0.226709	1.18777	0.750265
C3_03580C	GTT13	Glutathione peroxidase activity	-0.377756	-0.112688	-0.0232224	0.891514	0.366644	0.721177	1.37085
C2_04710C	URE2	Glutathione peroxidase activity	-0.0298907	0.113976	-0.191171	-0.309461	-0.00571761	-0.166998	-0.429155
C6_00850W			1.16899	2.16345	2.69955	2.88941	0.119379	1.64994	0.845335
CR_02130W	ECM4	Cytoplasmic glutathione S-transferase	0.307639	0.28864	0.295863	0.658614	0.523385	0.511608	0.893359
C4_02990C	GST2	Glutathione S transferase	1.38014	1.97476	1.64412	2.23014	0.68385	0.947833	0.939225
C3_03720W	GTT11	Glutathione S-transferase	0.87233	1.65564	1.50473	1.61386	0.501783	1.13419	0.460005
C5_01520C	GLR1	Glutathione reductase	0.674064	1.09667	1.2284	1.09982	0.130651	0.68499	0.133795
C5_01560C		Putative glutaredoxin	-0.0755532	-0.0522743	-0.376665	-0.24885	0.143597	-0.157516	-0.0529789
C2_09620W		Protein-disulfide reductase (glutathione) activity	0.237073	0.203593	0.454731	0.505915	0.0648636	0.282522	0.367185
C5_04340W	MPD1	Protein-disulfide reductase (glutathione) activity	0.0417316	0.0678666	-0.297281	-0.37366	-0.160884	-0.499897	-0.602411
C1_07880C	GCS1	Gamma-glutamylcysteine synthetase	0.211732	0.264105	0.250694	0.174846	0.626211	0.665173	0.536952
C4_00060W		Glutathione catabolic process	0.0212935	0.0660731	0.366007	0.682782	-0.392398	-0.0476848	0.224311
C5_04300C		Putative metallodipeptidase	0.098705	-0.180586	-0.111745	-0.192121	-0.0926476	-0.303098	-0.104183
C2_02990C	HYU1	Putative hydantoin utilization protein A	0.16379	0.0495054	0.541286	0.695788	-0.193567	0.183929	0.452715
C4_04340C	YFH1	Frataxin, oxidized glutathione reduction; glutathione metabolism	0.172701	0.2238	0.0261449	0.130354	-0.0991762	-0.245732	-0.192622
C4_00440C	OPT7	Putative oligopeptide transporter	-0.182566	-1.15481	-0.87177	-1.46728	0.130381	-0.558824	-0.182085
C4_07030W	MET16	Putative 3'-phosphoadenylsulfate reductase	-0.0430473	-0.0308082	-0.257311	-0.301111	-0.10897	-0.323234	-0.379273
C1_10040W	ERO1	Protein disulfide oxidoreductase activity	0.34738	0.52732	0.223608	0.258041	0.289513	0.165741	0.0202339
C7_03250C	PDI1	Putative protein disulfide-isomerase	-0.0950517	0.00859054	-0.151007	-0.0524503	0.0584307	0.00247557	-0.00261007
CR_10350C	TRX1	Thioredoxin	0.936411	1.39998	1.73485	1.7953	-0.0747103	0.723731	0.32061
C1_01300W		Putative thioredoxin	0.0781017	0.289007	0.0457877	0.0476947	-0.0983858	-0.1307	-0.339698
C4_02410C	AHP1	Thiol peroxidase activity;	0.600684	0.740697	1.42261	1.84679	-0.709754	0.112175	0.396341
C3_00480C	DOT5	Putative nuclear thiol peroxidase	0.19984	0.161126	0.54638	1.12124	0.0876309	0.434172	1.04774
C7_02810W	PRX1	Thioredoxin peroxidase	-0.31695	-0.551968	-0.412176	0.117177	-0.258297	-0.353523	0.410849
C1_05410C	TRP99	Thioredoxin peroxidase	0.068581	-0.0813462	-0.105363	0.237456	-0.0131708	-0.187115	0.305631
C3_06180C	TSA1	Hydroperoxide peroxidase C	1.10166	1.66375	1.84498	1.88617	-0.168542	0.574779	0.0538741
C3_06330W	TSA1B	Putative peroxidase	1.10422	1.67215	1.84815	1.88953	-0.166867	0.577067	0.050514
C6_00910C	AIP5	Protein with a predicted thioredoxin-like domain	0.0859445	0.291335	0.454753	0.752752	0.0312449	0.400053	0.492662
C4_05890W		Protein with a selenoprotein domain and a thioredoxin-like fold domain	0.295368	0.542281	0.479964	-0.0354614	0.311981	0.496577	-0.265762
C5_00910C	TRX2	Similar to thioredoxins	-0.0968313	-0.374562	-0.335097	-0.0705318	0.229343	-0.00892331	0.533372
C5_02710W	TRR1	Thioredoxin reductase	1.99303	2.86413	2.9411	2.8613	0.192764	1.14084	0.189929
C1_11890W	CMD2	PRDX activity	0.0929406	0.101631	0.208699	0.404514	0.404293	0.520052	0.707176
C2_05060C		PRDX activity	2.35321	3.60513	3.45869	3.27831	0.381346	1.48683	0.0545278
C7_02390W	AHP2	Putative thiol-specific peroxiredoxin	0.296775	0.549952	0.0808164	-0.0501983	0.197691	-0.018267	-0.402459
C3_02480C	CCP1	Cytochrome-c peroxidase	1.24717	2.0406	2.71245	2.78948	-0.0280247	1.43726	0.720859
C5_00810C		Peroxidase activity	0.349572	0.841585	0.727556	1.06899	0.4484	0.826383	0.675808
		Number of up-regulated antioxidative defence related genes:	6	16	23	26	2	13	17
		Number of antioxidative defence related genes:	58	58	58	58	58	58	58
		Total number of up-regulated genes:	45	253	698	1185	150	444	1090
		Total number of genes:	6473	6473	6473	6473	6473	6473	6473
		p-value (Fisher's exact test):	2.47e-06	3.399e-10	8.934e-09	2.766e-06	0.3906	0.0001137	0.01251
		Number of down-regulated antioxidative defence related genes:	1	3	6	6	1	4	7
		Number of antioxidative defence related genes:	58	58	58	58	58	58	58
		Total number of down-regulated genes:	19	129	848	1203	75	421	1035
		Total number of genes:	6473	6473	6473	6473	6473	6473	6473
		p-value (Fisher's exact test):	0.1574	0.1085	0.7895	0.971	0.4929	0.5269	0.8414

## Sheet: Part3
Supplementary Table 3 Transcription data of selected gene groups
Part 3: Genes involved in selected metabolic pathways.
Gene ID	Gene name	Feature	QMY23+MSB vs QMY23	QMY23+BM+MSB vs QMY23	cappz1+MSB vs cappz1	cappz1+BM+MSB vs cappz1	cappz1 vs QMY23	cappz1+MSB vs QMY23+MSB	cappz1+BM+MSB vs QMY23+BM+MSB
TCA pathway
C4_03940C	PYC2	Putative pyruvate carboxylase; binds biotin cofactor; repressed by Ssk1 response regulator, by benomyl treatment, or in an azole-resistant strain overexpressing MDR1; stationary phase enriched protein; flow model biofilm repressed	0.692953	1.16133	1.89685	2.35744	-1.09013	0.113771	0.105992
CR_03500W	CIT1	Citrate synthase; induced by phagocytosis; induced in high iron; Hog1-repressed; Efg1-regulated under yeast, not hyphal growth conditions; present in exponential and stationary phase; Spider biofilm repressed; rat catheter biofilm induced	-0.160169	0.091584	0.0885169	0.264463	-0.0151161	0.233569	0.157763
CR_08210C	ACO1	Aconitase; induced in high iron; 2 upstream CCAAT motifs; amino acid starvation (3-AT), amphotericin B, phagocytosis, farnesol induced; Hap43, fluconazole-repressed; Gcn4-regulated; antigenic in infection; flow and Spider biofilm repressed	-0.350707	-0.522698	-0.224969	-0.0752438	0.10381	0.229547	0.551264
CR_05790C	ACO2	Putative aconitate hydratase 2; induced in high iron; regulated by Gcn4; repressed by amino acid starvation (3-AT); protein levels decrease in stationary phase yeast; flow model and Spider biofilm repressed	0.0537221	0.156063	0.509966	0.960586	-0.336461	0.119783	0.468062
C1_09630W	IDH1	Putative mitochondrial NAD-isocitrate dehydrogenase subunit 1; soluble protein in hyphae; protein level decrease in stationary phase cultures	-0.216267	0.0196838	-0.289222	-0.181243	0.104597	0.0316421	-0.0963298
C2_03080W	IDH2	Putative mitochondrial NAD-isocitrate dehydrogenase subunit; induced by ciclopirox; induced in high iron; present in exponential and stationary growth phases; Spider biofilm repressed	-0.319348	-0.325636	-0.290019	-0.342469	-0.0703432	-0.0410145	-0.0871761
C3_00880W	KGD1	Putative 2-oxoglutarate dehydrogenase; regulated by Efg1 under yeast but not hyphal growth conditions; transcript induced in an RHE model of oral candidiasis; stationary phase enriched protein; Hap43-repressed; rat catheter biofilm induced	-0.286369	-0.536956	-0.391592	-0.43425	0.215789	0.110566	0.318495
CR_07420W	KGD2	Putative dihydrolipoamide S-succinyltransferase; induced in high iron; Hap43-repressed; Spider biofilm repressed	-0.302942	-0.428188	-0.378509	-0.398932	0.384025	0.308458	0.413281
CR_06760C	LSC2	Putative succinate-CoA ligase beta subunit; regulated by Mig1, Tup1; induced in high iron; protein present in exponential and stationary growth phase yeast cells; Spider biofilm repressed	-0.328827	-0.337701	-0.297371	-0.319166	-0.178859	-0.147403	-0.160323
C1_01690C	LSC1	Putative succinate-CoA ligase subunit; induced by high iron; fluconazole-induced; protein present in exponential and stationary growth phase yeast cultures; Spider biofilm repressed	-0.349954	-0.475399	-0.305076	-0.467524	-0.331478	-0.2866	-0.323603
C1_05260C	SDH1	Putative mitochondrial succinate dehydrogenase; macrophage/pseudohyphal-induced; repressed by nitric oxide	-0.0619391	-0.262629	0.182706	0.324675	-0.165913	0.0787321	0.421392
CR_05180C	SDH2	Succinate dehydrogenase, Fe-S subunit; localizes to surface of yeast cells, but not hyphae; induced in high iron and during log phase aerobic growth; repressed by nitric oxide, Hap43	-0.0468942	0.199558	-0.1654	-0.171467	0.0690584	-0.0494472	-0.301966
CR_04530W	FUM11	Fumarate hydratase; induced in high iron; protein in exponential and stationary-phase yeast cells, but higher in stationary phase; rat catheter biofilm repressed	0.0474591	-0.158351	-0.0405334	0.0645639	0.105848	0.0178557	0.328763
C3_07640C	FUM12	Putative fumarate hydratase; enzyme of citric acid cycle; fluconazole, Efg1 repressed; induced in high iron; protein present in exponential and stationary growth phase	-0.276282	-0.283453	-0.229003	-0.298113	0.219738	0.267018	0.205078
C4_01900C	MDH1-1	Predicted malate dehydrogenase precursor; macrophage-induced transcript; protein present in exponential and stationary growth phase yeast cultures; Spider biofilm repressed	-0.166033	-0.0267438	0.0127808	0.152149	0.119477	0.298291	0.29837
Fermentation/ oxidative ethanol degradation pathway
C4_01850C	PDC12	Putative pyruvate decarboxylase; fungal-specific (no human or murine homolog)	0.199511	0.146778	0.672369	1.16079	0.501811	0.974669	1.51582
C4_06570C	PDC11	Pyruvate decarboxylase; antigenic; on hyphal not yeast cell surface; Hap43, Gcn4, Efg1, Efh1, Hsf1 regulated; fluconazole, farnesol induced; amino acid starvation repressed; flow model biofilm induced; Spider biofilm repressed	0.591316	0.596815	0.697279	0.964658	-0.484304	-0.37834	-0.11646
C3_02800W	ADH4	Predicted 3-hydroxyacyl-CoA dehydrogenase; transcript is increased in azole-resistant strain overexpressing MDR1; transcript is increased in populations of cells exposed to fluconazole over multiple generations; mutant is viable	0.0756052	0.0797197	0.828428	1.5611	-0.30309	0.449733	1.17829
CR_02070C	ADH5	Putative alcohol dehydrogenase; regulated by white-opaque switch; fluconazole-induced; antigenic in murine infection; regulated by Nrg1, Tup1; Hap43, macrophage repressed, flow model biofilm induced; Spider biofilm induced	0.038348	-0.0781607	0.659164	1.2984	0.266076	0.886891	1.64264
C5_05050W	ADH1	Alcohol dehydrogenase; oxidizes ethanol to acetaldehyde; at yeast cell surface; immunogenic in humans/mice; complements S. cerevisiae adh1 adh2 adh3 mutant; fluconazole, farnesol-induced; flow model biofilm induced; Spider biofilm repressed	0.505665	0.598774	0.84984	1.27458	-0.56827	-0.224095	0.107538
C2_04470W	ADH3	Putative NAD-dependent (R,R)-butanediol dehydrogenase; regulated by white-opaque switch; induced by nitric oxide independent of Yhb1; Spider biofilm induced	0.058476	0.329565	0.42175	0.887616	-0.018153	0.345121	0.539898
C4_05130C	ALD6	Putative aldehyde dehydrogenase; stationary phase enriched protein; expression regulated upon white-opaque switch; rat catheter biofilm induced; rat catheter and Spider biofilm induced	0.14871	0.246414	0.618549	0.836839	0.0149815	0.484821	0.605406
C2_02970C	ALD5	NAD-aldehyde dehydrogenase; decreased expression in fluconazole-resistant isolate, or in hyphae; biofilm induced; fluconazole-downregulated; protein abundance is affected by URA3 expression in the CAI-4 strain; stationary phase enriched	-0.43763	-0.68126	-0.0209465	0.177374	-0.207894	0.208789	0.65074
Pentose phosphate pathway (oxidative branch)
C1_08980C_A	ZWF1	glucose-6-phosphate 1-dehydrogenase	0.637071	0.996408	1.0025	0.727006	0.322158	0.687584	0.0527562
CR_06700C_A	SOL3	6-phosphogluconolactonase	0.0321467	-0.084008	0.158241	0.49445	-0.0259202	0.100174	0.552538
C1_13860C_A	GND1	phosphogluconate dehydrogenase	0.118434	0.213196	0.431167	0.680894	-0.243161	0.0695724	0.224537
Glycogen metabolism
Glycogen catabolic process (GO term)
C7_00930W	GPH1	Putative glycogen phosphorylase; role in glycogen metabolism; regulated by Ssk1, Mig1, Tup1, Hap43; fluconazole-induced; localizes to cell surface of hyphae, not yeast; stationary phase enriched protein; Spider biofilm induced	0.363497	0.200499	0.476455	0.947648	0.382898	0.495857	1.13005
C4_05140C	GDB1	Putative glycogen debranching enzyme; expression is regulated upon white-opaque switch; regulated by Nrg1, Tup1; rat catheter biofilm repressed	0.387206	0.0996373	0.218137	0.444253	0.754668	0.585599	1.09928
C3_01320C	SGA1	Putative glucoamylase; induced in oralpharyngeal candidasis; rat catheter and Spider biofilm induced	-0.212278	-0.0982105	0.856819	0.716536	-0.396016	0.673081	0.41873
Glycogen biosynthetic process (GO term)
C1_01360C		Putative glycogen synthesis initiator; regulated by Efg1 and Efh1; Hog1-repressed; colony morphology-related gene regulation by Ssn6; induced by prostaglandins; flow model biofilm induced	0.259841	0.172238	0.851406	1.20022	-0.28588	0.305684	0.7421
CR_00780C	GSY1	UDP glucose/starch glucosyltransferase; transcript repressed by yeast-hyphal switch, Efg1-regulated; strong oxidative stress induced; colony morphology-related regulation by Ssn6; stationary phase enriched; flow model biofilm induced	0.506545	0.319378	0.889363	1.30694	0.0545297	0.437347	1.04209
C3_06450W	GLG2	Putative self-glucosylating initiator of glycogen synthesis; expression regulated upon white-opaque switch; hypha-induced; Spider biofilm induced (	-8.01e-05	0.333662	0.370582	1.01727	0.304116	0.674778	0.987726
C6_03340C	GLC3	Putative 1,4-glucan branching enzyme; fluconazole-induced; colony morphology-related gene regulation by Ssn6; stationary phase enriched protein	0.359854	0.326136	0.750854	0.878215	0.220169	0.611169	0.772248
CR_04660C	UGP1	UTP-glucose-1-phosphaturidyl transferase; localizes to yeast, not hyphal cell surface; Hog1-repressed; stationary phase enriched; induced in oralpharyngeal candidasis; rat catheter biofilm repressed; Bcr1-repressed in RPMI a/a biofilms	0.168616	0.198423	0.041073	0.266269	0.261294	0.133751	0.32914
C4_05140C	GDB1	Putative glycogen debranching enzyme; expression is regulated upon white-opaque switch; regulated by Nrg1, Tup1; rat catheter biofilm repressed	0.387206	0.0996373	0.218137	0.444253	0.754668	0.585599	1.09928
CR_02820W	PGM2	Ortholog of S. cerevisiae Pgm2; induced in planktonic culture; Tye7p-regulated; flow model biofilm induced; rat catheter biofilm repressed	0.357901	0.346795	0.470936	0.467075	0.26135	0.374385	0.381631
		Number of up-regulated TCA cycle related genes:	0	1	1	2	0	0	2
		Number of TCA cycle related genes:	15	15	15	15	15	15	15
		Total number of up-regulated genes:	45	253	698	1185	150	444	1090
		Total number of genes:	6473	6473	6473	6473	6473	6473	6473
		p-value (Fisher's exact test):	1	0.4505	0.8198	0.7902	1	1	0.7463
		Number of down-regulated TCA cycle erelated genes:	0	1	0	1	1	0	1
		Number of TCA cycle related genes:	15	15	15	15	15	15	15
		Total number of down-regulated genes:	19	129	848	1203	75	421	1035
		Total number of genes:	6473	6473	6473	6473	6473	6473	6473
		p-value (Fisher's exact test):	1	0.2609	1	0.9544	0.1605	1	0.9269
		Number of up-regulated ethanol fermentation related genes:	0	1	4	7	0	2	4
		Number of ethanol fermentation related genes:	8	8	8	8	8	8	8
		Total number of up-regulated genes:	45	253	698	1185	150	444	1090
		Total number of genes:	6473	6473	6473	6473	6473	6473	6473
		p-value (Fisher's exact test):	1	0.2732	0.006574	4.567e-05	1	0.09982	0.03166
		Number of down-regulated ethanol fermentation related genes:	0	1	0	0	0	0	0
		Number of ethanol fermentation related genes:	8	8	8	8	8	8	8
		Total number of down-regulated genes:	19	129	848	1203	75	421	1035
		Total number of genes:	6473	6473	6473	6473	6473	6473	6473
		p-value (Fisher's exact test):	1	0.1488	1	1	1	1	1
		Number of up-regulated glycogen metabolism related genes:	0	0	1	2	0	1	2
		Number of glycogen metabolism related genes:	3	3	3	3	3	3	3
		Total number of up-regulated genes:	45	253	698	1185	150	444	1090
		Total number of genes:	6473	6473	6473	6473	6473	6473	6473
		p-value (Fisher's exact test):	1	1	0.2899	0.08823	1	0.192	0.07547
		Number of down-regulated glycogen metabolism related genes:	0	0	0	0	0	0	0
		Number of glycogen metabolism related genes:	3	3	3	3	3	3	3
		Total number of down-regulated genes:	19	129	848	1203	75	421	1035
		Total number of genes:	6473	6473	6473	6473	6473	6473	6473
		p-value (Fisher's exact test):	1	1	1	1	1	1	1
		Number of up-regulated glycogen biosynthesis related genes:	0	0	3	4	0	0	6
		Number of glycogen metabolism related genes:	7	7	7	7	7	7	7
		Total number of up-regulated genes:	45	253	698	1185	150	444	1090
		Total number of genes:	6473	6473	6473	6473	6473	6473	6473
		p-value (Fisher's exact test):	1	1	0.03134	0.02447	1	1	0.0001351
		Number of down-regulated glycogen biosynthesis related genes:	0	0	0	0	0	0	0
		Number of glycogen metabolism related genes:	7	7	7	7	7	7	7
		Total number of down-regulated genes:	19	129	848	1203	75	421	1035
		Total number of genes:	6473	6473	6473	6473	6473	6473	6473
		p-value (Fisher's exact test):	1	1	1	1	1	1	1

## Sheet: Part4
Supplementary Table 3 Transcription data of selected gene groups
Part 4: Genes of ergosterol and fatty acid metabolism pathways.
Gene ID	Gene name	Feature	QMY23+MSB vs QMY23	QMY23+BM+MSB vs QMY23	cappz1+MSB vs cappz1	cappz1+BM+MSB vs cappz1	cappz1 vs QMY23	cappz1+MSB vs QMY23+MSB	cappz1+BM+MSB vs QMY23+BM+MSB
Ergosterol biosynthesis pathway
C7_00700W	CYB5	Cytochrome b(5); ortholog of S. cerevisiae Cyb5; induced in high iron; fluconazole-induced; shows colony morphology-related gene regulation by Ssn6; mutants are viable	0.296951	0.440485	0.191029	0.0147753	-0.367554	-0.473475	-0.793264
C1_08590C	ERG1	Squalene epoxidase, epoxidation of squalene to 2,3(S)-oxidosqualene; ergosterol biosynthesis; allylamine antifungal drug target; NADH reducing cofactor but S. cerevisiae Erg1 uses NADPH; flow model biofilm induced; Spider biofilm repressed	0.389323	0.0883623	0.480822	0.634801	-0.321072	-0.229573	0.225367
C1_00800C	ERG2	C-8 sterol isomerase; enzyme of ergosterol biosynthesis; converts fecosterol to episterol; mutant is hypersensitive to multiple drugs; ketoconazole-induced; flow model and Spider biofilm repressed	-0.160755	-0.128021	-0.469297	-0.667356	-0.224858	-0.5334	-0.764193
C1_04770C	ERG3	C-5 sterol desaturase; introduces C-5(6) double bond into episterol; some clinical isolates show increased azole resistance and defects in hyphal growth and virulence; Efg1p-repressed; fluconazole-induced	-0.112536	-0.324463	-0.5319	-0.652902	-0.437769	-0.857133	-0.766208
C3_00760W	ERG4	Protein similar to sterol C-24 reductase; shows Mob2p-dependent hyphal regulation; fluconazole-induced; caspofungin repressed; rat catheter biofilm repressed	0.271716	0.115962	0.188479	0.393187	-0.325055	-0.408292	-0.0478297
C7_02840C	ERG5	Putative C-22 sterol desaturase; fungal C-22 sterol desaturases are cytochrome P450 enzymes of ergosterol biosynthesis, catalyze formation of the C-22(23) double bond in the sterol side chain; transposon mutation affects filamentous growth	0.0373773	0.0953509	-0.20677	-0.152099	-0.221528	-0.465675	-0.468978
C3_02150C	ERG6	Delta(24)-sterol C-methyltransferase, converts zymosterol to fecosterol, ergosterol biosynthesis; mutation confers nystatin resistance; Hap43, GlcNAc-, fluconazole-induced; upregulated in azole-resistant strain; Spider biofilm repressed	0.235721	0.24697	-0.257243	-0.531507	0.115453	-0.37751	-0.663023
C2_02460W	ERG7	2,3-epoxysqualene-lanosterol cyclase (lanosterol synthase), conversion of 2,3-oxidosqualene to lanosterol in sterol biosynthesis; fluconazole-induced; possibly essential, disruptants not obtained by UAU1 method; rat catheter biofilm induced	0.122438	-0.18002	0.140078	0.311787	-0.128529	-0.110889	0.363278
C2_08610W	ERG9	Putative farnesyl-diphosphate farnesyl transferase (squalene synthase); sterol biosynthesis pathway; likely essential for growth; regulated by fluconazole, lovastatin; amphotericin B, caspofungin repressed; Spider biofilm repressed	0.22138	0.282408	0.23454	-0.353547	0.250454	0.263615	-0.385501
C2_04310W	ERG10	Acetyl-CoA acetyltransferase; role in ergosterol biosynthesis; soluble in hyphae; changes in protein abundance associated with azole resistance; fluconazole or ketoconazole induced; macrophage-downregulated protein; GlcNAc-induced protein	0.000687405	-0.126406	-0.057327	0.0306922	-0.306909	-0.364924	-0.149811
C5_00660C	ERG11	Lanosterol 14-alpha-demethylase; cytochrome P450 family; role in ergosterol biosynthesis; target of azole antifungals; may contribute to drug resistance; azole or flow model biofilm induced; drug treated biofilm induced; hypoxia regulated	0.418056	0.242669	0.257099	0.0892332	-0.0251571	-0.186114	-0.178593
C1_09460W	ERG12	Ortholog(s) have mevalonate kinase activity and role in ergosterol biosynthetic process, farnesyl diphosphate biosynthetic process, mevalonate pathway, isopentenyl diphosphate biosynthetic process, mevalonate pathway	-0.176608	-0.240258	-0.399614	-0.451354	-0.331354	-0.55436	-0.542449
CR_09160C	ERG13	3-hydroxy-3-methylglutaryl coenzyme A synthase; ergosterol biosynthesis; sumoylation target; Tn mutation affects filamentation; amphotericin B, caspofungin repressed; exponential, stationary growth phase expressed; Spider biofilm repressed	0.0638884	0.226277	-0.192325	-0.289084	-0.281275	-0.537488	-0.796636
C2_04580W	ERG20	Putative farnesyl pyrophosphate synthetase involved in isoprenoid and sterol biosynthesis, based on similarity to S. cerevisiae Erg20p; likely to be essential for growth, based on an insertional mutagenesis strategy	0.338036	0.27187	0.435175	0.0139063	0.175146	0.272285	-0.0828178
C2_09400C	ERG24	C-14 sterol reductase, has a role in ergosterol biosynthesis; mutation confers increased sensitivity to dyclonine; rat catheter and Spider biofilm repressed	0.0350013	-0.124147	-0.121489	-0.04634	-0.162124	-0.318614	-0.0843166
CR_02370W	ERG25	Putative C-4 methyl sterol oxidase; C4-demethylation of ergosterol biosynthesis intermediates, based on similarity to S. cerevisiae Erg25; fluconazole-induced; induced in azole-resistant strain; rat catheter and Spider biofilm induced	-0.19964	-0.510223	-0.622957	-0.755598	-0.0248069	-0.448123	-0.270182
C4_06270C	ERG26	C-3 sterol dehydrogenase, catalyzes the 2nd of 3 steps required to remove 2 C-4 methyl groups from an intermediate in ergosterol biosynthesis; amphotericin B, caspofungin repressed; Spider biofilm repressed	0.124144	0.290046	0.000986461	-0.027086	0.0583121	-0.0648455	-0.25882
CR_01140C	ERG27	3-Keto sterol reductase of ergosterol biosynthesis; acts in C-4 sterol demethylation with Erg25p and Erg26p; possible drug target, essential for viability; functional homolog of S. cerevisiae Erg27p	0.0388786	0.08202	-0.0200916	-0.003301	0.10387	0.0449	0.0185492
C1_03780C	HMG1	HMG-CoA reductase; enzyme of sterol pathway; inhibited by lovastatin; gene not transcriptionally regulated in response to lovastatin and fluconazole	-0.0258736	-0.170832	-0.0904561	-0.158225	-0.275896	-0.340479	-0.263289
C1_00070W	MVD	Mevalonate diphosphate decarboxylase; functional homolog of S. cerevisiae Erg19; possible drug target; regulated by carbon source, yeast-hypha switch, growth phase, antifungals; gene has intron; rat catheter, Spider biofilm repressed	-0.124795	-0.208769	0.0831242	0.274383	-0.203413	0.00450655	0.279739
Very long chain fatty acid biosynthesis
C1_01050C		Putative enoyl reductase involved in very long chain fatty acid elongation; possibly an essential gene, disruptants not obtained by UAU1 method	0.352976	0.257713	0.0184746	-0.0343489	0.121291	-0.213211	-0.170771
C2_03230C	FEN12	Putative protein with a predicted role in the elongation of fatty acids; amphotericin B, caspofungin repressed	-0.024721	0.0764484	-0.100044	-0.111873	-0.0882413	-0.163564	-0.276563
C3_05280C		Predicted fatty acid acyl transferase-related protein domain; repressed by prostaglandins	-0.25519	-0.326968	-0.216196	-0.360637	0.155976	0.194971	0.122307
C1_12790C	FEN1	Putative fatty acid elongase; predicted role in sphingolipid biosynthesis; possibly an essential gene, disruptants not obtained by UAU1 method; Spider and flow model biofilm induced	-0.374465	-0.533333	-0.539293	-0.62224	-0.343215	-0.508043	-0.432121
CR_06070W		Putative microsomal beta-keto-reductase; transcript upregulated by treatment with ciclopirox olamine; induced by alpha pheromone in SpiderM medium; regulated by Sef1, Sfu1, and Hap43	0.125851	0.0541418	0.291012	0.435951	0.0045936	0.169755	0.386403
Unsaturated fatty acid biosynthetic process
C6_01110W	FAD2	Delta-12 fatty acid desaturase, involved in production of linoleic acid, which is a major component of membranes	0.0473001	-0.0719201	-0.256977	-0.265251	0.332994	0.0287171	0.139664
C1_13070C	FAD3	Omega-3 fatty acid desaturase; production of alpha-linolenic acid, a major component of membranes; caspofungin induced; Plc1-regulated; colony morphology-related gene regulation by Ssn6; Spider biofilm induced, flow model biofilm repressed	-0.526012	-0.744289	-1.53973	-1.80715	0.676387	-0.337336	-0.386478
C1_08360C	OLE1	Fatty acid desaturase, essential protein involved in oleic acid synthesis; required for aerobic hyphal growth and chlamydospore formation; subject to hypoxic regulation; fluconazole-induced; caspofungin repressed; Hap43p-induced	-0.0378572	-0.350082	0.0871441	0.300563	-0.0176291	0.107372	0.633017
C2_07090C	OLE2	Protein with similarity to fatty acid desaturase (stearoyl-CoA desaturase); homozygous null mutant shows decreased production of prostaglandin E2	-0.0104317	-0.0908598	-0.194295	-0.0633984	0.208368	0.0245043	0.235829
Carnitine acetyltransferase activity
C4_02020W	CAT2	Major carnitine acetyl transferase; intracellular acetyl-CoA transport; localized in peroxisomes and mitochondria; induced in macrophages; Hog1-repressed; stationary phase enriched; farnesol-upregulated in biofilm; Spider biofilm induced	-0.316019	-0.471691	0.272665	0.445956	-0.368901	0.219783	0.548747
C1_01740W	CTN1	Carnitine acetyl transferase; required for growth on nonfermentable carbon sources, not for hyphal growth or virulence in mice; induced in macrophage; macrophage/pseudohyphal-repressed after 16 hr; rat catheter, Spider biofilm induced	0.0315757	0.856194	1.66325	2.0646	-0.642491	0.989183	0.565913
C3_04000C	CTN3	Peroxisomal carnitine acetyl transferase; no obvious metabolic, hyphal, virulence defects in Ura+ strain; induced by macrophage engulfment, hyphal growth, starvation, nonfermentable carbon sources; rat catheter, Spider biofilm induced	0.189032	0.600834	0.883414	1.30311	0.111671	0.806053	0.813949
		Number of up-regulated ergosterol biosynthetic related genes:	0	0	1	3	0	0	1
		Number of ergosterol biosynthetic related genes:	20	20	20	20	20	20	20
		Total number of up-regulated genes:	45	253	698	1185	150	444	1090
		Total number of genes:	6473	6473	6473	6473	6473	6473	6473
		p-value (Fisher's exact test):	1	1	0.8983	0.7371	1	1	0.9751
		Number of down-regulated ergosterol biosynthetic related genes:	0	1	2	5	0	8	7
		Number of ergosterol biosynthetic related genes:	20	20	20	20	20	20	20
		Total number of down-regulated genes:	19	129	848	1203	75	421	1035
		Total number of genes:	6473	6473	6473	6473	6473	6473	6473
		p-value (Fisher's exact test):	1	0.3318	0.7583	0.3092	1	1.883e-05	0.03006

## Sheet: Part5
Supplementary Table 3 Transcription data of selected gene groups
Part 5: Genes involved in iron, copper and zinc metabolism.
Gene ID	Gene name	Feature	QMY23+MSB vs QMY23	QMY23+BM+MSB vs QMY23	cappz1+MSB vs cappz1	cappz1+BM+MSB vs cappz1	cappz1 vs QMY23	cappz1+MSB vs QMY23+MSB	cappz1+BM+MSB vs QMY23+BM+MSB
Ferric reductases
C4_05770C	CFL1	Protein similar to ferric reductase Fre10p; possible functional homolog of S. cerevisiae Fre1p (reports differ); transcription is negatively regulated by Sfu1p, copper, amphotericin B, caspofungin; induced by ciclopirox olamine	-0.134062	-0.286177	-0.747625	-0.92391	0.396783	-0.21678	-0.240951
C4_05780C	CFL2	Oxidoreductase; iron utilization; Sfu1/Sef1/Hap43/Nrg1/Tup1/Rim101 regulated; alkaline/low iron/fluphenazine/ciclopirox olamine, flucytosine, fluconazole, Spider/flow model/rat catheter biofilm induced; caspofungin/amphotericin B repressed	-1.09952	-1.42448	-2.3065	-3.21227	2.32097	1.11399	0.533178
C4_05840W	FRE3	Protein with similarity to ferric reductase Fre10p; possibly an essential gene, disruptants not obtained by UAU1 method	-0.0597799	-0.240404	-0.0411222	0.00814692	0.0496822	0.0683399	0.298233
C5_01380W	CFL5	Ferric reductase; induced in low iron; ciclopirox olamine, flucytosine induced; amphotericin B, Sfu1 repressed; Tbf1, Hap43 induced	-1.21887	-1.0411	-4.29838	-4.42665	3.07415	-0.00535957	-0.311401
C5_01360W	CFL4	C-terminus similar to ferric reductases; induced in low iron; Sfu1-repressed; ciclopirox olamine induced; colony morphology-related gene regulation by Ssn6; Hap43-repressed; Sef1-regulated	-1.32483	-1.37982	-3.92394	-4.48087	4.41032	1.81121	1.30927
CR_07300W		Protein similar to ferric reductase Fre10p; possibly an essential gene, disruptants not obtained by UAU1 method	-0.206296	-0.314998	-0.688035	-0.192188	0.107594	-0.374146	0.230404
C7_00430W		Putative ferric reductase; induced by Mac1 under copper starvation; Plc1-regulated; Rim101-repressed	-0.284048	0.011134	-0.699949	0.0729339	0.625772	0.209871	0.687572
CR_06670W	CFL11	Superoxide-generating NADPH oxidase, produces extracellular burst of reactive oxygen species at growing cell tips during hyphal morphogenesis, flucytosine repressed; possibly adherence-induced; rat catheter biofilm repressed	-0.338219	0.175487	-1.18213	-1.09726	1.55914	0.715228	0.286391
C2_05070W	FRE9	Ferric reductase; alkaline induced; ciclopirox olamine; Hap43-induced	-0.530928	-0.530944	-0.551248	-0.382941	0.311983	0.291663	0.459986
C4_04320W	FRE10	Major cell-surface ferric reductase under low-iron conditions; 7 transmembrane regions and a secretion signal predicted; Tup1, Rim101, Ssn6, Hog1, caspofungin repressed; ciclopirox olamine induced; rat catheter biofilm induced	-1.4116	-2.10174	-2.54588	-3.65909	1.59531	0.461023	0.0379518
C1_11020W		Protein similar to ferric reductase Fre10p; possibly an essential gene, disruptants not obtained by UAU1 method	-0.178835	-0.421674	-0.0621772	-0.0865919	-0.233477	-0.11682	0.101605
C4_00110C	FRP1	Ferric reductase; alkaline-induced by Rim101; iron-chelation-induced by CCAAT-binding factor; fluconazole-repressed; ciclopirox-, hypoxia-, Hap43-induced; colony morphology-related regulation by Ssn6; Spider and flow model biofilm induced	-0.164506	-0.506455	-0.792893	-0.424198	1.11626	0.487874	1.19852
C7_00100W	FRP2	Putative ferric reductase; alkaline induced by Rim101; fluconazole-downregulated; upregulated in the presence of human neutrophils; possibly adherence-induced; regulated by Sef1, Sfu1, and Hap43	0.171461	0.248424	0.269233	0.61912	-0.0229791	0.0747931	0.347717
CR_06870C		Protein similar to ferric reductase Fre10p	0.494494	0.0864645	0.621426	0.92074	0.239881	0.366814	1.07416
CR_07290W	FRE7	Copper-regulated cupric reductase; repressed by ciclopirox olamine or 17-beta-estradiol; induced by alkaline conditions or interaction with macrophage; Spider biofilm induced	-0.235931	-0.283071	-0.591928	-0.308733	0.268113	-0.0878841	0.242452
C2_03530W		Ortholog(s) have superoxide-generating NADPH oxidase activity, role in apoptotic process, regulation of actin cytoskeleton organization and perinuclear endoplasmic reticulum localization	0.0817649	0.152387	0.0912744	-0.00142428	0.0624821	0.0719916	-0.091329
C1_09780C		Putative iron/copper reductas; involved in iron homeostasis; rat catheter and Spider biofilm induced	0.141285	0.143766	0.425711	0.580318	0.200807	0.485233	0.637359
Multicopper oxidases
C6_00480C	FET31	Putative multicopper oxidase; ketoconazole/caspofungin/amphotericin B repressed; Sef1/Sfu1/Hap43 regulated; reports differ if functional homolog of ScFet3; rat catheter and Spider biofilm induced	-1.36618	-1.8349	-2.35319	-3.4199	1.54083	0.55383	-0.0441654
C6_00460C	FET3	Multicopper oxidase; required for growth in low iron and prostaglandin E2 synthesis	0.109859	-0.0710876	0.123348	0.229272	-0.117748	-0.104259	0.182612
C5_00460C	FET33	Putative multicopper ferro-O2-oxidoreductase; repressed in core caspofungin response; fails to complement S. cerevisiae fet3 iron-related phenotypes; rat catheter and Spider biofilm induced	0.117465	0.022966	-0.322782	-0.291099	0.239647	-0.2006	-0.0744182
C6_00440C	FET34	Multicopper ferroxidase; induced by low iron, ciclopirox olamine, ketoconazole, hypoxia; alkaline induced by Rim101; repressed in fluconazole-resistant isolate; Sfu1, Hog1 repressed; complements S. cerevisiae fet3; Spider biofilm induced	-0.67425	-1.06529	-1.51893	-2.29735	0.456538	-0.388145	-0.775524
C6_00470C	FET99	Multicopper oxidase family protein; similar to S. cerevisiae Fet3; does not complement S. cerevisiae fet3 mutant growth under low-iron; iron-repressed; regulated by Tup1, Rim101; flow model biofilm induced; Spider biofilm repressed	-0.845789	-1.59559	-1.60211	-2.46558	1.98144	1.22511	1.11144
C5_03020W	CCC2	Copper-transporting P-type ATPase of Golgi; required for wild-type iron assimilation (indirect effect via Fet3p); induced by iron starvation, ciclopirox olamine; caspofungin repressed; not required for virulence in mouse systemic infection	-0.497816	-0.693019	-1.40838	-1.78003	0.673816	-0.236752	-0.413199
Iron permeases
C1_14130W	FTR1	High-affinity iron permease; required for mouse virulence, low-iron growth; iron, amphotericin B, caspofungin, ciclopirox, Hog1p, Sef1p, Sfu1p, and Hap43p regulated; complements S. cerevisiae ftr1 iron transport; Hap43p-repressed	-1.41881	-2.34578	-2.44407	-3.6947	0.849629	-0.175626	-0.499284
C1_14220C	FTR2	High-affinity iron permease; probably interacts with ferrous oxidase; regulated by iron level, ciclopirox olamine, amphotericin B, caspofungin; complements S. cerevisiae ftr1 iron transport defect; Hap43-repressed; Spider biofilm induced	-0.0361307	-0.11861	-0.45502	-0.588849	-0.340419	-0.759308	-0.810658
C1_09400C	FTH1	Protein similar to S. cerevisiae Fth1p, a high affinity iron transporter for intravacuolar stores of iron; repressed by Sfu1p, amphotericin B, caspofungin; induced by alkaline pH, ciclopirox olamine; regulated by Sef1p, Sfu1p, and Hap43p	-0.286566	-0.710021	-1.44535	-1.10636	1.4503	0.291509	1.05396
CR_01270C	FTH2	Putative iron transporter; similar to S. cerevisiae Fth1p	-0.26487	-0.0765034	-0.311439	-0.455605	0.272173	0.225604	-0.106928
Ferritin uptake
CR_07070C	ALS3	Cell wall adhesin; epithelial adhesion, endothelial invasion; alleles vary in adhesiveness; immunoprotective in mice; binds SspB adhesin of S. gordonii in mixed biofilm; induced in/required for Spider biofilm; flow model biofilm repressed	0.130682	0.0645675	0.105831	0.266724	-0.0322636	-0.057114	0.169893
Siderophore uptake
C2_08050C	SIT1	Transporter of ferrichrome siderophores, not ferrioxamine B; required for human epithelial cell invasion in vitro, not for mouse systemic infection; regulated by iron, Sfu1, Rfg1, Tup1, Hap43; rat catheter and Spider biofilm induced	-0.804816	-1.55082	-2.55262	-2.41011	1.14184	-0.605969	0.282547
Hemoglobin/ Hem uptake
C4_00130W	RBT5	GPI-linked cell wall protein; hemoglobin utilization; Rfg1, Rim101, Tbf1, Fe regulated; Sfu1, Hog1, Tup1, serum, alkaline pH, antifungal drugs, geldamycin repressed; Hap43 induced; required for RPMI biofilms; Spider biofilm induced	-0.546977	-0.842621	-1.72027	-2.21318	2.26778	1.09449	0.897222
C7_00090C	CSA1	Surface antigen on elongating hyphae and buds; strain variation in repeat number; ciclopirox, filament induced, alkaline induced by Rim101; Efg1-, Cph1, Hap43-regulated; required for WT RPMI biofilm formation; Bcr1-induced in a/a biofilms	-0.0561333	-0.23059	0.177401	0.151966	-0.0488749	0.18466	0.333681
C4_06920C	CSA2	Extracellular heme-binding protein involved in heme-iron acquisition; regulated by Tsa1, Tsa1B in minimal media at 37 deg; induced by ketoconazole, nitric oxide, Hap43; required for normal RPMI biofilm formation	-0.250635	-0.147139	0.674434	0.925253	-1.12122	-0.196148	-0.0488254
C4_00120W	PGA7	GPI-linked hyphal surface antigen; induced by ciclopirox olamine, ketoconazole, Rim101 at pH 8; Hap43, fluconazole; flow model biofilm induced; Spider biofilm induced; required for RPMI biofilm; Bcr1-induced in a/a biofilm	-0.0195489	-0.0848403	-0.411274	-0.046554	1.30995	0.918228	1.34824
C4_00450C	PGA10	GPI anchored membrane protein; utilization of hemin and hemoglobin for Fe in host; Rim101 at ph8/hypoxia/ketoconazole/ciclopirox/hypha-induced; required for RPMI biofilm formation, Bcr1-induced in a/a biofilm; rat catheter biofilm repressed	0.852969	0.805356	1.11256	1.44382	-0.573323	-0.313735	0.0651364
C1_00350C	HMX1	Heme oxygenase; utilization of hemin iron; transcript induced by heat, low iron, or hemin; repressed by Efg1; induced by low iron; upregulated by Rim101 at pH 8; Hap43-induced; Spider and flow model biofilm induced	-0.236478	-0.31023	-0.907333	-0.46832	0.0915771	-0.579277	-0.0665134
Regulation
CR_02190C	SEF1	Zn2-Cys6 transcription factor; regulates iron uptake; negatively regulated by Sfu1p, positively regulated by Tbf1; promotes virulence in mice; mutants display decreased colonization of mouse kidneys; Spider biofilm induced	-0.182823	-0.174649	-0.6676	-0.581513	0.623045	0.138268	0.216181
C1_10020W	SFU1	GATA-type transcription factor; regulator of iron-responsive genes; represses iron utilization genes if iron is present; Hap43-repressed; promotes gastrointestinal commensalism in mice; Spider biofilm induced	0.093746	0.105878	0.314441	0.411032	-0.512835	-0.292139	-0.207681
C2_07170C	AFT2	Putative Aft domain transcription factor; role in regulation of iron metabolism, oxidative stress, adhesion, hyphal growth, colony morphology, virulence; complements S. cerevisiae aft1 mutation; Spider biofilm induced	0.18102	0.278595	-0.000914647	-0.0899284	0.293954	0.112019	-0.0745696
C1_11210C	HAP43	CCAAT-binding factor-dependent transcription factor; repressor; also called CAP2; required for low iron response; similar to bZIP transcription factor AP-1; repressed by Sfu1; ciclopirox olamine induced; rat catheter, Spider biofilm induced	-0.256686	-0.22737	-0.315575	-0.316262	0.278002	0.219113	0.18911
Intracellular homeostasis
C2_08070C	MRS4	Mitochondrial carrier family member, involved in iron homeostasis; putative membrane transporter localized to the mitochondrial membrane; transcription under control of Atf2p; regulated by Sef1p, Sfu1p, and Hap43p	-0.0954141	-0.35879	-0.253063	-0.208856	0.17109	0.0134411	0.321023
C3_03710W	CCC1	Manganese transporter; required for normal filamentous growth; mRNA binds She3, localized to hyphal tips; repressed by NO, alkaline pH; colony morphology-related regulation by Ssn6; regulated by Sef1, Sfu1, Hap43; Spider biofilm induced	-0.0407525	-0.0787287	0.0852289	-0.15355	-0.561604	-0.435622	-0.636425
C2_00580C	SMF3	Putative vacuolar iron transporter; alkaline upregulated; caspofungin repressed; induced by Mnl1 under weak acid stress; Hap43-repressed	0.0856207	-0.194208	0.127872	0.106537	-0.15059	-0.108339	0.150155
C6_04210C	ATM1	Member of MDR subfamily of ABC family; ortholog of S. cerevisiae ABC transporter, Atm1; induced in low iron; induced by nitric oxide independent of Yhb1	0.453283	0.949756	0.92922	1.01085	-0.00619994	0.469737	0.0548991
C1_10720C	MNN2	Alpha-1,2-mannosyltransferase; similar to S. cerevisiae Mnn2; role in cell wall integrity, temperature sensitivity; iron utilization in low iron; Tn mutation affects filamentous growth; filament induced; increased chitin exposes beta-glucan	-0.0176384	-0.114668	-0.17737	-0.265625	-0.0554314	-0.215163	-0.206389
C2_07160W	SMF12	Ortholog of S. cerevisiae Smf1; manganese transporter; Gcn4-regulated; Hap43, alkaline induced; caspofungin repressed; mutants are viable	-0.213202	-0.35213	-0.491679	-0.636789	0.193198	-0.0852794	-0.0914612
Chaperon
CR_06950C	ATX1	Putative cytosolic copper metallochaperone; flucytosine induced; Ssr1-repressed; rat catheter biofilm induced	0.709649	0.888539	1.23134	1.43703	0.236295	0.757988	0.784788
Copper homeostasis and uptake
C1_09250W	CRP1	Copper transporter; CPx P1-type ATPase; mediates Cu resistance; similar to Menkes and Wilson disease proteins; copper-induced; Tbf1-activated; suppresses Cu sensitivity of S. cerevisiae cup1 mutant; flow model biofilm induced	0.708068	0.666578	1.6165	1.78904	-0.475763	0.432669	0.646699
C1_07180W	CCS1	Copper chaperone involved in activation and protection of superoxide dismutase Sod1p	0.328584	0.457478	0.728479	0.937114	0.130657	0.530552	0.610293
C7_00510W	MAC1	Copper fist transcription factor; regulator of CTR1 copper transporter; induces CTR1 in low-copper conditions; required for copper regulation of SOD1 and SOD3; Spider biofilm induced	-0.567884	-0.862912	-0.953108	-1.14988	-0.0664784	-0.451702	-0.353449
C6_00790C	CTR1	Copper transporter; transcribed in low copper; induced Mac1, Tye7, macrophage interaction, alkaline pH via Rim101; 17-beta-estradiol repressed; complements S. cerevisiae ctr1 ctr3 copper transport mutant; flow model/Spider biofilm induced	-0.757907	-0.417033	-1.50586	-1.14993	0.590823	-0.157134	-0.142069
C5_03020W	CCC2	Copper-transporting P-type ATPase of Golgi; required for wild-type iron assimilation (indirect effect via Fet3p); induced by iron starvation, ciclopirox olamine; caspofungin repressed; not required for virulence in mouse systemic infection	-0.497816	-0.693019	-1.40838	-1.78003	0.673816	-0.236752	-0.413199
Zinc homeostasis and uptake
C4_06970C	ZRT1	Putative zinc transporter; acts with Pra1 in sequestration of zinc from host tissues during infection; hyphal, macrophage-induced; alkaline induced upon adherence to polystyrene; induced in oralpharyngeal candidasis; Spider biofilm induced	-0.101483	-0.370762	-0.505798	-0.224795	-0.0337364	-0.438051	0.11223
C2_02590W	ZRT2	Zinc transporter, essential for zinc uptake and acidic conditions tolerance; transcript induced by amphotericin B, interaction with macrophages; induced in oralpharyngeal candidiasis; Spider biofilm induced	0.0805585	-0.252824	-0.282773	-0.341754	-0.3709	-0.734231	-0.459829
C4_06980W	PRA1	Cell surface protein that sequesters zinc from host tissue; enriched at hyphal tips; released extracellularly; binds to host complement regulators; mediates leukocyte adhesion and migration; immunogenic in mouse; produced at ambient pH	-0.0830946	-0.139048	-0.564649	-0.422634	0.314253	-0.167302	0.0306658
C2_02200W	ZRC1	Putative zinc transporter essential for tolerance to zinc; plays a role in zincosome formation; Hap43-induced; required for normal filamentous growth; mRNA binds She3 and is localized to hyphal tips	-0.188902	-0.209918	-0.39244	-0.549686	-0.0804893	-0.284028	-0.420257
C2_02180W		Ortholog of S. cerevisiae Zrt3, vacuolar membrane zinc transporter; predicted Kex2 substrate; induced in oralpharyngeal candidasis; flow model biofilm induced; Spider biofilm induced	0.0614117	0.050018	0.299157	0.0898595	-0.0154958	0.222249	0.0243457
C4_04850C	CSR1	Transcription factor; role in zinc homeostasis and regulation of Spider biofilm matrix; mutation affects filamentous growth; can suppress S. cerevisiae rok1 mutant inviability; Spider biofilm induced; mutants for abnormal Spider biofilms	-0.526538	-0.700572	-0.704124	-0.823798	0.492968	0.315382	0.369742
		Number of up-regulated iron metabolism related genes:	0	1	4	6	11	7	8
		Number of iron metabolism related genes:	48	48	48	48	48	48	48
		Total number of up-regulated genes:	45	253	698	1185	150	444	1090
		Total number of genes:	6473	6473	6473	6473	6473	6473	6473
		p-value (Fisher's exact test):	1	0.8535	0.7759	0.896	7.753e-09	0.04358	0.573
		Number of down-regulated iron metabolism related genes:	5	9	19	18	0	1	1
		Number of iron metabolism related genes:	48	48	48	48	48	48	48
		Total number of down-regulated genes:	19	129	848	1203	75	421	1035
		Total number of genes:	6473	6473	6473	6473	6473	6473	6473
		p-value (Fisher's exact test):	1.948e-07	2.396e-08	8.015e-07	0.004225	1	0.9608	0.9998

## Sheet: Part6
Supplementary Table 3 Transcription data of selected gene groups
Part 6: Selected genes involved in branched-chain amino acid biosynthetic process, glutamate degradation and drug resistance
Gene ID	Gene name	Feature	QMY23+MSB vs QMY23	QMY23+BM+MSB vs QMY23	cappz1+MSB vs cappz1	cappz1+BM+MSB vs cappz1	cappz1 vs QMY23	cappz1+MSB vs QMY23+MSB	cappz1+BM+MSB vs QMY23+BM+MSB
Selected genes in branched-chain amino acid biosynthetic process
C2_09940W	GCN4	bZIP transcription factor; amino acid control response; required for Efg1-dependent pseudohyphal induction by amino acid starvation, not by serum; human whole blood and PMN induced; required for biofilm formation; Spider biofilm induced	0.312632	0.647538	0.260825	0.352854	-0.618778	-0.670584	-0.913461
C2_06190W	ILV1	Putative threonine dehydratase; regulated by Gcn4 and Gcn2; induced by amino acid starvation (3-AT); protein present in yeast exponential and stationary phase cultures; early-stage flow model biofilm induced	0.22379	0.410042	0.303678	0.532479	-0.217554	-0.137666	-0.0951164
C3_02320W	ILV2	Putative acetolactate synthase; regulated by Gcn4p; induced by amino acid starvation (3-AT treatment); stationary phase enriched protein	0.393332	0.504244	0.585904	0.550868	-0.304912	-0.11234	-0.258288
C4_01370W	ILV6	Putative regulatory subunit of acetolacetate synthase; alkaline induced; regulated by Gcn2 and Gcn4; protein present in exponential and stationary growth phase yeast; Spider biofilm repressed	0.240242	0.448119	0.368348	0.384202	-0.224375	-0.0962692	-0.288292
C5_05410C	ILV3	Dihydroxyacid dehydratase; repressed by nitric oxide; macrophage-induced protein; protein in exponential and stationary growth phase; Sef1, Sfu1p, Hap43-regulated; farnesol-repressed; flow model biofilm induced; Spider biofilm repressed	0.203416	0.0757914	0.565857	0.670592	-0.432819	-0.0703774	0.161982
C6_00870C	ILV5	Ketol-acid reductoisomerase; antigenic; regulated by Gcn4; GlcNAc, amino acid starvation (3-AT)-induced; macrophage-repressed protein; protein present in exponential and stationary phase; flow model and Spider biofilm repressed	0.353803	0.498507	0.982845	1.20116	-0.555498	0.0735432	0.147159
Glutamate degradation to succinate
C1_11660W	GAD1	Putative glutamate decarboxylase; alkaline, macrophage-downregulated gene; amphotericin B induced; induced by Mnl1 under weak acid stress; stationary phase enriched protein; rat catheter biofilm repressed	0.101552	0.0300215	0.176454	0.162048	0.0513371	0.126239	0.183364
C2_04190C	UGA1	Putative GABA transaminase; transcription regulated by Mig1 and Tup1; stationary phase enriched protein; rat catheter and Spider biofilm induced	-1.00074	-1.10715	-1.06204	-1.31982	-0.129357	-0.190657	-0.342034
C1_01810C	UGA22	Predicted succinate semialdehyde dehydrogenase; predicted role in glutamate catabolism; transcription regulated by Mig1, Tup1, Gcn4; mutants are viable	0.0759678	-0.115137	0.456868	0.908498	-0.0222352	0.358665	1.0014
C2_03640W	UGA11	Putative gamma-aminobutyrate (GABA) transaminase; macrophage-induced; overlaps orf19.854.1, which is a region annotated as a blocked reading frame; Spider biofilm induced	-0.134676	-0.110956	0.0735053	0.37153	-0.200633	0.00754751	0.281853
C3_03470W	UGA2	Succinate semialdehyde dehydrogenase; for utilization of gamma-aminobutyrate (GABA) as a nitrogen source; part of 4-aminobutyrate and glutamate degradation pathways; rat catheter biofilm induced	-0.597664	-0.726796	-0.659342	-0.875184	0.207548	0.145871	0.0591606
Putative ABC transporters
C7_02330W	YCF1	Putative glutathione S-conjugate transporter; MRP/CFTR-subfamily, ABC type transporter; human neutrophil-induced; oxidative stress-induced via Cap1; possible association with multidrug resistance; possibly essential; Spider biofilm induced	0.313095	0.423876	0.740957	0.747695	0.376278	0.80414	0.700097
C6_03840C	SNQ2	Protein similar to S. cerevisiae Snq2p transporter; member of PDR subfamily of ABC family; transposon mutation affects filamentation; benomyl-induced transcription; detected at yeast-form cell plasma membrane by mass spec	0.767551	1.19564	0.909787	1.10025	0.497054	0.63929	0.401669
C1_03820W	PDR16	Phosphatidylinositol transfer protein; induction correlates with CDR1, CDR2 overexpression/azole resistance; fluphenazine, 17-beta-estradiol, ethynyl estradiol, NO induced; farnesol-downregulated in biofilm; rat catheter biofilm induced	0.58575	1.049	1.19333	1.37024	0.391107	0.998683	0.712349
C6_04210C	ATM1	Member of MDR subfamily of ABC family; ortholog of S. cerevisiae ABC transporter, Atm1; induced in low iron; induced by nitric oxide independent of Yhb1	0.453283	0.949756	0.92922	1.01085	-0.00619994	0.469737	0.0548991
C3_05220W	CDR1	Multidrug transporter of ABC superfamily; transports phospholipids in an in-to-out direction; induced by beta-estradiol, progesterone, corticosteroid, or cholesterol; Spider biofilm induced	0.288971	0.440907	0.4633	0.729094	-0.188819	-0.0144899	0.099368
C3_04890W	CDR2	Multidrug transporter, ATP-binding cassette (ABC) superfamily; transports phospholipids, in-to-out direction; overexpressed in azole-resistant isolates; repressed in young biofilms	0.235411	0.335254	0.426418	0.663064	-0.215296	-0.0242884	0.112514
C6_03170C	MDR1	Plasma membrane MDR/MFS multidrug efflux pump; methotrexate is preferred substrate; overexpression in drug-resistant clinical isolates confers fluconazole resistance; repressed in young biofilms; rat catheter biofilm induced	2.25696	2.85155	2.70121	2.65715	0.966182	1.41044	0.771786
