# Supplementary material for: The Negative Effect of Protein Phosphatase Z1 Deletion on the Oxidative Stress Tolerance of Candida albicans Is Synergistic with Betamethasone Exposure
Source: J Fungi (Basel). 2021 Jul 6;7(7):540. doi: 10.3390/jof7070540 (PMC8305657; doi:10.3390/jof7070540)
Supplement: Supplementary file 1 [file jof-07-00540-s001.zip › jof-1267055-supplementary/TableS4_RT-PCR vs RNAseq.xlsx]

## Sheet: TableS5_RT-PCR vs RNAseq
Supplementary Table S4. Results of RT-qPCR experiments
RNAseq data are presented as log2FC values, whereby FC is short for “fold-change”.
Relative transcription levels (ΔΔCP) were quantified with ΔΔCP = ΔCPcontrol –ΔCPtreated. CP values stand for the qRT-PCR cycle numbers of crossing points. The act1 (C1_13700W) was used as reference gene.
RT-qPCR data are presented as mean ± SD calculated from three independent measurements.
Significantly higher or lower than zero ΔΔCP values (upregulated or downregulated gene) are marked with red and blue colors, respectively (Student’s t-test, p<0.05, n = 3).
Diagrams demonstrate the correlation between RT-qPCR and RNAseq data. Numbers in parentheses represent the Pearson’s correlation coefficient between the RT-qPCR and RNA-seq values.
Gene ID	Gene name	Function	cappz1 vs QMY23				cappz1+BM vs QMY23+BM				cappz1+MSB vs QMY23+MSB				cappz1+BM+MSB vs QMY23+BM+MSB
			RT-qPCR (ΔΔCP)			RNAseq (log2FC)	RT-qPCR (ΔΔCP)			RNAseq (log2FC)	RT-qPCR (ΔΔCP)			RNAseq (log2FC)	RT-qPCR (ΔΔCP)			RNAseq (log2FC)
Control
C3_04430W	RIP1	Ubiquinol cytochrome c-reductase	-0.0233333	±	0.080829	-0.0211264	0.01	±	0.043589	0.0825147	-0.113333	±	0.0521455	-0.0532812	-0.0466667	±	0.107858	-0.102824
CR_07890W	EFG1	Transcription factor	-0.0166667	±	0.0493288	-0.0152365	0.0233333	±	0.0907377	0.266404	0.01	±	0.0360555	-0.095002	0.0566667	±	0.0702377	0.129706
Oxidatíve stress response
C1_06810W	CAT1	Catalase	0.065	±	0.0212132	-0.203322	0.145	±	0.190919	-0.0505082	1.025	±	0.335355	1.50635	0.94	±	0.113137	0.805386
C4_02320C	SOD1	Superoxide dismutase	-0.00166667	±	0.0375278	-0.335756	0.03	±	0.0458258	-0.341986	0.445	±	0.241402	0.0609949	0.668333	±	0.379353	0.12097
C7_00110W	SOD3	Superoxide dismutase	0.735	±	0.120208	1.03428	0.45	±	0.144853	0.736378	0.175	±	0.17435	0.235171	0.185	±	0.106066	0.160476
C5_01520C	GLR1	Glutathione reductase	0.165	±	0.120208	0.130651	0.115	±	0.0753553	0.0606974	0.62	±	0.240416	0.68499	0.13	±	0.169706	0.133795
C5_02710W	TRR1	Thioredoxin reductase	0.116667	±	0.0929157	0.192764	0.18	±	0.150997	0.202649	1.10333	±	0.170392	1.14084	0.346667	±	0.136137	0.189929
Membrane transport
C3_05220W	CDR1	Drug transmembrane transporter	-0.33	±	0.137477	-0.188819	-0.193333	±	0.178979	-0.22794	0.02	±	0.19	-0.0144899	0.586667	±	0.255408	0.099368
C6_03170C	MDR1	Drug transmembrane transporter	0.08	±	0.06245	0.966182	-0.259667	±	0.191103	0.670994	1.08667	±	0.158219	1.41044	1.46333	±	0.673523	0.771786
C3_00720W	PMA1	Plasma membrane H(+)-ATPase	-0.0366667	±	0.0288675	-0.58781	0.0933333	±	0.0650641	-0.295343	-0.243333	±	0.156862	-0.71716	-0.459	±	0.255445	-0.904137
C4_01070W	HGT17	Hexose transmembrane transporter	0.12	±	0.0719615	0.405681	0.206667	±	0.145016	0.284414	0.516667	±	0.245092	2.13264	0.943333	±	0.458522	2.44987
Metabolism
CR_00200W	PCK1	Gluconeogenesis	0.11	±	0.06245	0.394917	0.318333	±	0.14852	0.740036	0.193333	±	0.10116	0.173835	0.24	±	0.16245	0.0477289
C3_01930W	PXP2	Fatty acid beta-oxidation	-0.37	±	0.25865	-0.424786	-0.163333	±	0.37899	-0.27646	0.3	±	0.548361	0.654866	0.633333	±	0.580115	1.12458
C5_01360W	CFL4	Ferric reductase	0.683333	±	0.135769	4.41032	0.763333	±	0.46504	3.74957	0.599333	±	0.48771	1.81121	1.07333	±	0.266083	1.30927
C1_14130W	FTR1	Iron permease	0.343333	±	0.18037	0.849629	0.326667	±	0.26727	0.830333	-0.126667	±	0.163122	-0.175626	-0.766667	±	0.374738	-0.499284
Pearson’s correlation coefficients:						0.74162				0.757107				0.793725				0.754983
Gene ID	Gene name	Function	QMY23+BM vs QMY23				QMY23+MSB vs QMY23				QMY23+BM+MSB vs QMY23				cappz1+BM vs cappz1				cappz1+MSB vs cappz1				cappz1+BM+MSB vs cappz1
			RT-qPCR (ΔΔCP)			RNAseq (log2FC)	RT-qPCR (ΔΔCP)			RNAseq (log2FC)	RT-qPCR (ΔΔCP)			RNAseq (log2FC)	RT-qPCR (ΔΔCP)			RNAseq (log2FC)	RT-qPCR (ΔΔCP)			RNAseq (log2FC)	RT-qPCR (ΔΔCP)			RNAseq (log2FC)
Control
C3_04430W	RIP1	Ubiquinol cytochrome c-reductase	-0.0433333	±	0.0305505	-0.0758251	-0.0233333	±	0.130128	-0.1181	-0.0966667	±	0.070946	-0.0690635	-0.02	±	0.06245	0.0278159	-0.256667	±	0.155033	-0.150254	-0.166667	±	0.0999157	-0.150761
CR_07890W	EFG1	Transcription factor	-0.0466667	±	0.0251661	-0.080125	-0.01	±	0.06	0.125833	-0.0733333	±	0.0602771	-0.0353768	-0.00666667	±	0.0288675	0.201516	-0.0266667	±	0.0680686	0.0460679	-0.02	±	0.069282	0.109566
Oxidatíve stress response
C1_06810W	CAT1	Catalase	0.02	±	0.0989949	-0.436562	1.315	±	0.205061	1.1931	1.6	±	0.298995	1.8255	0.1	±	0.0707107	-0.283748	2.375	±	0.319203	2.90278	2.805	±	0.333345	2.83421
C4_02320C	SOD1	Superoxide dismutase	0.015	±	0.0736546	-0.10084	0.88	±	0.171572	0.416349	1.18167	±	0.242092	0.664827	0.0466667	±	0.0404145	-0.10707	1.32667	±	0.255044	0.8131	1.65167	±	0.36484	1.12155
C7_00110W	SOD3	Superoxide dismutase	0.31	±	0.282843	0.290542	-0.54	±	0.114142	-0.953583	-1.01	±	0.198995	-0.635789	-0.015	±	0.0494975	-0.00735844	-1.1	±	0.240416	-1.75269	-1.03	±	0.127279	-1.50959
C5_01520C	GLR1	Glutathione reductase	0.13	±	0.155563	0.183842	0.855	±	0.162635	0.674064	1.115	±	0.262635	1.09667	0.08	±	0.0989949	0.113888	1.31	±	0.148995	1.2284	1.08	±	0.127279	1.09982
C5_02710W	TRR1	Thioredoxin reductase	0.06	±	0.0781025	-0.118712	1.25	±	0.187178	1.99303	1.56667	±	0.111505	2.86413	0.123333	±	0.122202	-0.108826	2.53667	±	0.467432	2.9411	2.10333	±	0.306159	2.8613
Membrane transport
C3_05220W	CDR1	Drug transmembrane transporter	0.0633333	±	0.0763763	0.148222	0.503333	±	0.171561	0.288971	0.83	±	0.310483	0.440907	8.14164e-15	±	0.052915	0.1091	0.653333	±	0.39425	0.4633	1.54667	±	0.170119	0.729094
C6_03170C	MDR1	Drug transmembrane transporter	0.226667	±	0.159478	0.110982	1.42333	±	0.155006	2.25696	1.55333	±	0.129182	2.85155	-0.113	±	0.110666	-0.184206	2.53	±	0.62857	2.70121	2.93667	±	0.515978	2.65715
C3_00720W	PMA1	Plasma membrane H(+)-ATPase	-0.08	±	0.0556776	-0.21771	-0.87	±	0.274044	-0.423659	-1.2	±	0.2249	-0.724483	0.05	±	0.034641	0.0747579	-0.976667	±	0.189033	-0.553009	-1.42233	±	0.234894	-1.04081
C4_01070W	HGT17	Hexose transmembrane transporter	-0.0433333	±	0.0404145	-0.0938505	0.876667	±	0.389629	-0.0678633	0.923333	±	0.180738	0.113643	0.0433333	±	0.0550757	-0.215118	0.373333	±	0.170392	1.65909	0.846667	±	0.325167	2.15783
Metabolism
CR_00200W	PCK1	Gluconeogenesis	-0.178333	±	0.106105	-0.359869	-0.966667	±	0.183394	-1.26723	-1.23333	±	0.159478	-1.6429	0.03	±	0.0556776	-0.0147507	-0.853333	±	0.115902	-1.48831	-1.30333	±	0.159478	-1.99009
C3_01930W	PXP2	Fatty acid beta-oxidation	-0.193333	±	0.110604	-0.415494	0.33	±	0.181934	-0.0577464	0.54	±	0.185203	-0.119148	0.0133333	±	0.046188	-0.267168	0.54	±	0.230651	1.02191	0.963333	±	0.301443	1.43022
C5_01360W	CFL4	Ferric reductase	0.09	±	0.06245	-0.0800365	-0.630667	±	0.314613	-1.32483	-0.85	±	0.112838	-1.37982	-0.37	±	0.182882	-0.740783	-1.14667	±	0.235018	-3.92394	-1.84	±	0.276495	-4.48087
C1_14130W	FTR1	Iron permease	-0.0933333	±	0.0723418	-0.163972	-1.03	±	0.234307	-1.41881	-1.32667	±	0.265016	-2.34578	-0.11	±	0.0781025	-0.183268	-1.3	±	0.235797	-2.44407	-1.73667	±	0.225033	-3.6947
Pearson’s correlation coefficients:						0.812404				0.9				0.905539				0.74162				0.909945				0.916515
